# Supplementary material for: Machine learning and radiomics for predicting therapeutic efficacy in newly diagnosed sputum-negative pulmonary tuberculosis: a retrospective study
Source: PeerJ journal article supplement (doi:10.7717/peerj.20557), 2026-01-16
Supplement: Supplementary_material_1.docx [file Supplementary_material_1.docx]

**Supplementary table 1** Code and optimal hyperparameters of three machine learning models

| **SVM Hyperparameters** | | **RF Hyperparameters** | | **LR Hyperparameters** | |
| --- | --- | --- | --- | --- | --- |
| kernel | linear | n_estimators | 174 | penalty | l2 |
| degree | 3 | criterion | entropy | dual | false |
| gamma | auto | max_depth | 13 | tol | 0.0001 |
| C | 0.1 | min_samples_split | 2 | C | 0.6 |
| coef0 | 0 | min_samples_leaf | 1 | fit_intercept | true |
| shrinking | true | min_weight_fraction_leaf | 0 | intercept_scaling | 1 |
| probability | false | max_features | auto | warm_start | false |
| tol | 0.001 | min_impurity_decrease | 0 | solver | liblinear |
| max_iter | 1500 | bootstrap | true | max_iter | 2000 |
| cache_size | 200 | warm_start | false | multi_class | auto |
| verbose | false | verbose | 0 | verbose | 0 |
| class_weight | balanced | class_weight | balanced | class_weight | balanced |
| decision_function_shape | ovr | ccp_alpha | 0.015 |  |  |
| break_ties | false |  |  |  |  |

Note: All models were optimized by grid search combined with ten-fold cross-validation on the training set. Parameters shown here correspond to the best-performing configurations used for model training.
