# Supplementary material for: Machine learning and radiomics for predicting therapeutic efficacy in newly diagnosed sputum-negative pulmonary tuberculosis: a retrospective study
Source: PeerJ journal article supplement (doi:10.7717/peerj.20557), 2026-01-16
Supplement: Supplementary_material_2.docx [file Supplementary_material_2.docx]

**Supplementary table 2** Distribution and proportion of key CT signs in the three cohorts

| **CT signs** | **Train cohorts (n=178)** | **Test cohorts (n=77)** | **Internal validation cohorts (n=37)** | **P value** |
| --- | --- | --- | --- | --- |
| Nodules, % | 97.2 | 100 | 100 | 0.20 |
| Tree-bud sign, % | 86.5 | 71.4 | 75.7 | 0.01* |
| Consolidation, % | 28.7 | 22.1 | 37.8 | 0.21 |
| Cavity, % | 37.6 | 31.2 | 43.2 | 0.41 |
| Fibrostripe, % | 58.4 | 61.0 | 40.5 | 0.09 |

Note: Statistical comparisons of CT signs among cohorts were performed using chi-square or Fisher’s exact tests. P-values were corrected for multiple comparisons using the Bonferroni method. Statistical significance was defined as P < 0.05.
