# Supplementary material for: Machine learning and radiomics for predicting therapeutic efficacy in newly diagnosed sputum-negative pulmonary tuberculosis: a retrospective study
Source: PeerJ journal article supplement (doi:10.7717/peerj.20557), 2026-01-16
Supplement: Supplementary_material_3.docx [file Supplementary_material_3.docx]

**Supplementary table 3** Radiomic features selected by the LASSO regression for model construction and RF importance score generated by the RF model

| **Features classes** | **Radiomic Features** | **LASSO coefficient** | **RF importance score** | |
| --- | --- | --- | --- | --- |
| **First Order Features (n=43)** | auto__exponential_firstorder_Energy | 0.048 | 0.005 | |
| auto__exponential_firstorder_InterquartileRange | 0.225 | 0.0136 | |
| auto__exponential_firstorder_Kurtosis | -0.120 | 0.006 | |
| auto__exponential_firstorder_Maximum | -0.236 | 0.011 | |
| auto__exponential_firstorder_Median | 0.199 | 0.013 | |
| auto__exponential_firstorder_Minimum | 0.014 | 0.008 | |
| auto_gradient_firstorder_90Percentile· | -0.282 | 0.008 | |
| auto_gradient_firstorder_Kurtosis | 0.058 | 0.008 | |
| auto__gradient_firstorder_Uniformity | -0.486 | 0.007 | |
| auto__lbp-2D_firstorder_10Percentile | -0.065 | 0.001 | |
| auto__lbp-2D_firstorder_InterquartileRange | -0.146 | 0.001 | |
| auto__lbp-3D-k_firstorder_Maximum | 0.081 | 0.009 | |
| auto__lbp-3D-k_firstorder_Minimum | 0.004 | 0.008 | |
| auto__lbp-3D-k_firstorder_RootMeanSquared | -0.150 | 0.007 | |
| auto__lbp-3D-m1_firstorder_10Percentile | 0.389 | 0.002 | |
| auto__lbp-3D-m1_firstorder_InterquartileRange | 0.091 | 0.003 | |
| auto__lbp-3D-m2_firstorder_Maximum | 0.080 | 0.005 | |
| auto_lbp-3D-m2_firstorder_Skewness | -0.158 | 0.007 | |
| auto__lbp-3D-m2_firstorder_Variance | -0.144 | 0.006 | |
| auto__log-sigma-1-0-mm-3D_firstorder_90Percentile | 0.083 | 0.006 | |
| auto__log-sigma-3-0-mm-3D_firstorder_Energy | -0.336 | 0.007 | |
| auto__log-sigma-3-0-mm-3D_firstorder_Minimum | 0.205 | 0.011 | |
| auto__logarithm_firstorder_90Percentile | -0.149 | 0.005 | |
| auto_original_firstorder_Maximum | -0.054 | 0.009 | |
| auto_square_firstorder_Minimum | 0.175 | 0.001 | |
| auto__wavelet-HHH_firstorder_Maximum | 0.023 | 0.007 | |
| auto__wavelet-HHH_firstorder_Median | 0.038 | 0.008 | |
| auto_wavelet-HHL_firstorder_Maximum | -0.029 | 0.006 | |
| auto__wavelet-HHL_firstorder_Mean | 0.134 | 0.011 | |
| auto__wavelet-HHL_firstorder_Skewness | -0.149 | 0.007 | |
| auto__wavelet-HLH_firstorder_Kurtosis | -0.067 | 0.008 | |
| auto__wavelet-HLH_firstorder_Maximum | 0.252 | 0.009 | |
| auto__wavelet-HLH_firstorder_Mean | -0.036 | 0.009 | |
| auto__wavelet-HLL_firstorder_Minimum | 0.017 | 0.006 | |
| auto__wavelet-LHH_firstorder_Maximum | 0.037 | 0.005 | |
| auto__wavelet-LHH_firstorder_Mean | -0.022 | 0.011 | |
| auto__wavelet-LHH_firstorder_Skewness | 0.094 | 0.007 | |
| auto__wavelet-LHL_firstorder_Mean | 0.133 | 0.012 | |
| auto__wavelet-LHL_firstorder_Skewness | 0.084 | 0.010 | |
| auto__wavelet-LLH_firstorder_10Percentile | -0.022 | 0.008 | |
| auto__wavelet-LLH_firstorder_Maximum | 0.293 | 0.010 | |
| auto__wavelet-LLH_firstorder_Minimum | -0.482 | 0.010 | |
| auto__wavelet-LLL_firstorder_Minimum | 0.363 | 0.007 | |
| **Gray Level Co-occurrence Matrix (GLCM) Features (n=22)** | auto__exponential_glcm_Imc1 | -0.021 | 0.003 | |
| auto__gradient_glcm_Idmn | -0.008 | 0.007 | |
| auto__lbp-3D-k_glcm_Correlation | -0.097 | 0.009 | |
| auto__log-sigma-1-0-mm-3D_glcm_Correlation | 0.132 | 0.010 | |
| auto__log-sigma-3-0-mm-3D_glcm_Imc1 | -0.380 | 0.007 | |
| auto__square_glcm_Idmn | 0.044 | 0.009 | |
| auto__square_glcm_InverseVariance | -0.118 | 0.009 | |
| auto__squareroot_glcm_Imc2 | -0.280 | 0.008 | |
| auto__wavelet-HHH_glcm_ClusterShade | 0.119 | 0.009 | |
| auto__wavelet-HHH_glcm_Correlation | -0.507 | 0.013 | |
| auto__wavelet-HHL_glcm_ClusterProminence | 0.203 | 0.008 | |
| auto_wavelet-HHL_glcm_ClusterShade | 0.114 | 0.005 | |
| auto__wavelet-HHL_glcm_Correlation | 0.370 | 0.007 | |
| auto__wavelet-HHL_glcm_Imc2 | -0.008 | 0.006 | |
| auto__wavelet-HLH_glcm_Correlation | -0.249 | 0.011 | |
| auto__wavelet-HLH_glcm_Idmn | 0.068 | 0.009 | |
| auto__wavelet-HLL_glcm_Correlation | -0.282 | 0.007 | |
| auto__wavelet-LHH_glcm_Correlation | 0.023 | 0.006 | |
| auto__wavelet-LHL_glcm_Idmn | -0.032 | 0.007 | |
| auto__wavelet-LHL_glcm_MCC | 0.090 | 0.009 | |
| auto__wavelet-LLH_glcm_Correlation | 0.177 | 0.009 | |
| auto__wavelet-LLH_glcm_SumEntropy | 0.176 | 0.008 | |
| **Gray Level Dependence Matrix (GLDM)Features (n=17)** | auto__exponential_gldm_DependenceNonUniformity | 0.629 | 0.004 | |
| auto__exponential_gldm_DependenceVariance | 0.626 | 0.047 | |
| auto__gradient_gldm_SmallDependenceLowGrayLevelEmphasis | 0.116 | 0.012 | |
| auto__lbp-3D-k_gldm_DependenceNonUniformityNormalized | 0.183 | 0.011 | |
| auto__lbp-3D-k_gldm_LargeDependenceLowGrayLevelEmphasis | -0.017 | 0.008 | |
| auto__log-sigma-1-0-mm-3D_gldm_LargeDependenceHighGrayLevelEmphasis | -0.102 | 0.010 | |
| auto__log-sigma-1-0-mm-3D_gldm_LowGrayLevelEmphasis | 0.058 | 0.009 | |
| auto__logarithm_gldm_DependenceNonUniformityNormalized | 0.840 | 0.023 | |
| auto__logarithm_gldm_LargeDependenceLowGrayLevelEmphasis | 0.161 | 0.012 | |
| auto__logarithm_gldm_SmallDependenceLowGrayLevelEmphasis | -0.218 | | 0.008 |
| auto_square_gldm_GrayLevelNonUniformity | 0.117 | | 0.006 |
| auto__wavelet-HHH_gldm_LowGrayLevelEmphasis | 0.145 | 0.006 | |
| auto__wavelet-HHH_gldm_SmallDependenceHighGrayLevelEmphasis | -0.096 | 0.006 | |
| auto__wavelet-HHL_gldm_LargeDependenceHighGrayLevelEmphasis | -0.126 | 0.007 | |
| auto__wavelet-HLL_gldm_LargeDependenceLowGrayLevelEmphasis | 0.188 | 0.008 | |
| auto__wavelet-LLH_gldm_LargeDependenceHighGrayLevelEmphasis | -0.109 | 0.008 | |
| auto__wavelet-LLH_gldm_LargeDependenceLowGrayLevelEmphasis | 0.344 | 0.011 | |
| **Gray Level Size Zone Matrix (GLSZM)Features (n=18)** | auto__exponential_glszm_GrayLevelNonUniformity | 0.845 | 0.021 | |
| auto__exponential_glszm_SizeZoneNonUniformityNormalized | 0.065 | 0.025 | |
| auto__exponential_glszm_ZoneVariance | -0.056 | 0.008 | |
| auto__lbp-2D_glszm_SizeZoneNonUniformity | 0.060 | 0.004 | |
| auto__lbp-3D-k_glszm_ZoneEntropy | 0.381 | 0.022 | |
| auto__log-sigma-3-0-mm-3D_glszm_SizeZoneNonUniformityNormalized | 0.343 | 0.013 | |
| auto__log-sigma-3-0-mm-3D_glszm_SmallAreaLowGrayLevelEmphasis | -0.400 | 0.010 | |
| auto__logarithm_glszm_LargeAreaEmphasis | 0.031 | 0.008 | |
| auto__original_glszm_LargeAreaLowGrayLevelEmphasis | -0.165 | 0.007 | |
| auto__square_glszm_LargeAreaHighGrayLevelEmphasis | 0.116 | 0.008 | |
| auto__square_glszm_LowGrayLevelZoneEmphasis | 0.152 | 0.014 | |
| auto__square_glszm_SizeZoneNonUniformityNormalized | -0.001 | 0.014 | |
| auto__squareroot_glszm_LargeAreaHighGrayLevelEmphasis | -0.019 | 0.006 | |
| auto__wavelet-HHH_glszm_LargeAreaHighGrayLevelEmphasis | 0.145 | 0.007 | |
| auto__wavelet-HHL_glszm_LargeAreaHighGrayLevelEmphasis | 0.292 | 0.004 | |
| auto__wavelet-HLH_glszm_GrayLevelNonUniformityNormalized | 0.056 | 0.008 | |
| auto__wavelet-HLL_glszm_LargeAreaLowGrayLevelEmphasis | 0.062 | 0.008 | |
| auto__wavelet-LLL_glszm_LargeAreaLowGrayLevelEmphasis | 0.261 | 0.010 | |
| **Neighbouring Gray Tone Difference Matrix (NGTDM) Features (n=4)** | auto__lbp-3D-k_ngtdm_Busyness | 0.064 | 0.006 | |
| auto__log-sigma-1-0-mm-3D_ngtdm_Contrast | 0.111 | 0.006 | |
| auto__original_ngtdm_Busyness | -0.068 | 0.005 | |
| auto_wavelet-HLH_ngtdm_Busyness | -0.160 | 0.005 | |
| **Gray Level Run Length Matrix (GLRLM) Features (n=3)** | auto__exponential_glrlm_GrayLevelNonUniformity | 0.113 | 0.008 | |
| auto__lbp-3D-k_glrlm_ShortRunHighGrayLevelEmphasis | 0.623 | 0.019 | |
| auto__log-sigma-3-0-mm-3D_glrlm_RunEntropy | -0.441 | 0.015 | |
| **Shape Features (3D) (n=4)** | auto__original_shape_Elongation | -0.258 | 0.010 | |
| auto__original_shape_Flatness | 0.355 | 0.008 | |
| auto__original_shape_Maximum2DDiameterColumn | -0.210 | 0.010 | |
| auto__original_shape_Maximum2DDiameterRow | -0.320 | 0.009 | |
| **Shape Features (2D) (n=2)** | auto__original_shape_LeastAxisLength | -0.018 | 0.007 | |
|  | auto__original_shape_MajorAxisLength | 0.184 | 0.008 | |

Note: Features were extracted from manually segmented lesions and normalized before selection. Feature classes include first-order features, shape features, and texture features (GLCM, GLRLM, GLSZM, NGTDM, GLDM).
