# Supplementary material for: Machine learning and radiomics for predicting therapeutic efficacy in newly diagnosed sputum-negative pulmonary tuberculosis: a retrospective study
Source: PeerJ journal article supplement (doi:10.7717/peerj.20557), 2026-01-16
Supplement: Supplementary_Material_5.xlsx [file Supplementary_Material_5.xlsx]

## Sheet: Supplementary Material 4
roi_id	auto__exponential_firstorder_10Percentile	auto__exponential_firstorder_90Percentile	auto__exponential_firstorder_Energy	auto__exponential_firstorder_Entropy	auto__exponential_firstorder_InterquartileRange	auto__exponential_firstorder_Kurtosis	auto__exponential_firstorder_Maximum	auto__exponential_firstorder_Mean	auto__exponential_firstorder_MeanAbsoluteDeviation	auto__exponential_firstorder_Median	auto__exponential_firstorder_Minimum	auto__exponential_firstorder_Range	auto__exponential_firstorder_RobustMeanAbsoluteDeviation	auto__exponential_firstorder_RootMeanSquared	auto__exponential_firstorder_Skewness	auto__exponential_firstorder_TotalEnergy	auto__exponential_firstorder_Uniformity	auto__exponential_firstorder_Variance	auto__exponential_glcm_Autocorrelation	auto__exponential_glcm_ClusterProminence	auto__exponential_glcm_ClusterShade	auto__exponential_glcm_ClusterTendency	auto__exponential_glcm_Contrast	auto__exponential_glcm_Correlation	auto__exponential_glcm_DifferenceAverage	auto__exponential_glcm_DifferenceEntropy	auto__exponential_glcm_DifferenceVariance	auto__exponential_glcm_Id	auto__exponential_glcm_Idm	auto__exponential_glcm_Idmn	auto__exponential_glcm_Idn	auto__exponential_glcm_Imc1	auto__exponential_glcm_Imc2	auto__exponential_glcm_InverseVariance	auto__exponential_glcm_JointAverage	auto__exponential_glcm_JointEnergy	auto__exponential_glcm_JointEntropy	auto__exponential_glcm_MCC	auto__exponential_glcm_MaximumProbability	auto__exponential_glcm_SumAverage	auto__exponential_glcm_SumEntropy	auto__exponential_glcm_SumSquares	auto__exponential_gldm_DependenceEntropy	auto__exponential_gldm_DependenceNonUniformity	auto__exponential_gldm_DependenceNonUniformityNormalized	auto__exponential_gldm_DependenceVariance	auto__exponential_gldm_GrayLevelNonUniformity	auto__exponential_gldm_GrayLevelVariance	auto__exponential_gldm_HighGrayLevelEmphasis
6d294a7534084d7eac0f48b9de188f93	0.0419090374172321	1.4909479099558138	55517.942287195845	0	1.0520921935131415	3.1066102200500927	6.590874011963208	0.760161977300504	0.5069175047102448	0.818971454825694	0.0089497008906901	6.581924311072518	0.4134122556445596	0.9644354535108464	0.4851020326531016	55517.942287195845	1	0.3522895122552599	1	0	0	0	0	1	0	0	0	1	1	1	1	0	0	0	1	1	0	1	1	2	0	0	2.318947479978469	25837.283708618143	0.4328723312662201	22.25318229874649	59688	0	1
926f04f3c27d4253bd9de4992f9d8b8a	0.024976822652657337	0.1179055975046288	1662.112919873997	0	0.028324706725553	167.253635532058	6.768008208737984	0.074844520505212	0.0619940805043876	0.0372558640869524	0.0173521848703259	6.750656023867658	0.0147704368480245	0.1833542713775789	10.12326129218099	1662.112919873997	1	0.0280170865827477	1	0	0	0	0	1	0	0	0	1	1	1	1	0	0	0	1	1	0	1	1	2	0	0	3.532492346980364	8122.2628236245955	0.1642852512869052	31.36592219754453	49440	0	1
b15ae85176e84cd3adea1da50f134873	0.022191011569040544	0.1581319298071298	5630.655996917047	0	0.0478948891124926	98.0461604249434	7.514364674410353	0.1104563734849519	0.1092995965328175	0.0460375074304701	0.0051559381099077	7.509208736300446	0.0230482554319334	0.3197554947425061	8.38976846691902	5630.655996917047	1	0.0900429659745776	1	0	0	0	0	1	0	0	0	1	1	1	1	0	0	0	1	1	0	1	1	2	0	0	2.036374062002708	24491.9902126346	0.4447348007596484	23.90865862564812	55071	0	1
c2e0499af9c9486e8e5e57e0816b73fb	0.034078995018237385	1.3853539931718548	19726.392649673297	0.0005936579042768	0.5684429647012043	232.64412050503503	35.68204014357194	0.4603157321420349	0.4879311073591183	0.1320536425708313	0.0133868767378762	35.66865326683406	0.2848864623114506	0.8508412799636397	6.995232852837028	19726.392649673297	0.9999266055046858	0.512040310432707	1.0000877046399472	8.767380035032134e-05	8.768150855087425e-05	8.769692902891892e-05	8.77046399474911e-05	-4.38542e-05	8.77046399474911e-05	0.0013083638475061	8.769692902891892e-05	0.9999561476800264	0.9999561476800264	0.9999824590720104	0.9999707651200176	-3.97475e-06	7.449109610827561e-05	8.77046399474911e-05	1.0000438523199735	0.9998246022864828	0.0013960684874533	4.385424778808605e-05	0.9999122953600524	2.0000877046399475	0.0013083638475061	4.385039224410251e-05	3.1017535159365366	6931.882381004808	0.2543903402328455	29.28605391553215	27247.00007339719	3.6697247656998646e-05	1.0001100957833315
cf58444995634b0398bce17fd38cf7da	0.02196386160980511	0.4834990275248114	9217.358833110298	0	0.0653796613110999	160.9977236435403	19.98609467965493	0.1766269656326198	0.2152008068491345	0.0417663993320755	0.013549206741347	19.972545472913577	0.0498502087938927	0.4331988859343104	6.605798513629448	9217.358833110298	1	0.1564641897861409	1	0	0	0	0	1	0	0	0	1	1	1	1	0	0	0	1	1	0	1	1	2	0	0	3.130335873720989	12278.873607915792	0.2499923368266749	28.55487430053965	49117	0	1
ac943fa327ed4adf844453ced772955d	0.04109770483218916	0.2251829367753978	40347.022578207085	0.0010294529361647	0.040215989948343	21793.433549550224	160.16440268080515	0.1524249924664209	0.1531109941674448	0.0609167345039912	0.0328677756445775	160.13153490516058	0.0240585786414225	0.9013231498643351	127.565887086578	40347.022578207085	0.9998791954418372	0.7891500421529785	1.0001428490008384	0.0213896194740925	0.0033371165142388	0.0005618621881122	0.0004819917445209	0.0236503484288967	0.0001162164682009	0.0008235147919941	0.0004819686242973	0.9999696575918762	0.9999673829444504	0.9999938149544172	0.9999890728693066	-0.0286168	0.0020566407385775	3.3240250444819465e-05	1.0000614373006802	0.9999003034053272	0.0008733650489606	0.0544145221343391	0.999950149743033	2.0001228746013604	0.0008235147919941	0.0002609634831583	3.398818415673855	9299.253095741467	0.1872395670138219	38.31066497531853	49659.00024161884	0.0008254982195265	1.0011879593274942
b475899ab6134818ab3784b0301f8494	0.049360096666504094	1.4005508766743944	1616.2207685643325	0	0.6238594978943683	25.892043091171047	9.08978279442018	0.5106303402181501	0.5312292016870311	0.1431057634217985	0.0274866228694076	9.062296171550772	0.300389347563901	0.9488949058645392	3.739770776163608	1616.2207685643325	1	0.639658198024369	1	0	0	0	0	1	0	0	0	1	1	1	1	0	0	0	1	1	0	1	1	2	0	0	3.949636806366532	182.61782729805012	0.101736951140975	46.5082673163616	1795	0	1
68827bf622a44ecda568f9e57e60596a	0.12477203676747836	1.390524108031196	77373.77722794047	0	0.854642352990576	2.618110541918442	4.5266768652868485	0.8263812589863605	0.4241097723904703	0.9509127784903156	0.0494203528372285	4.47725651244962	0.3382643696785916	0.9648790369803092	0.1067456501425068	77373.77722794047	1	0.2480855708001659	1	0	0	0	0	1	0	0	0	1	1	1	1	0	0	0	1	1	0	1	1	2	0	0	2.502484426795007	31511.14012922788	0.379154365101588	25.304701378733647	83109	0	1
92c9334c8d1a4852a0cb994039154ecd	0.02353038006439992	1.650808382619459	83686.99038612947	0.000282319194143	1.0790357450606731	385.8454420858258	51.10735803298255	0.9132549715474704	0.5330017509146969	0.98408748033946	0.0075339393195234	51.09982409366303	0.4015620699638847	1.1669449350451546	6.685801645460672	83686.99038612947	0.9999674563915733	0.527725838371369	1.000071232007968	0.0005697747958332	0.000284897555499	0.0001424589364197	0.0001424640159361	-1.78083e-05	7.123200796807784e-05	0.0005776557084068	0.0001424589364197	0.999976255997344	0.9999715071968128	0.9999890412295436	0.9999857535984062	-1.49208e-06	3.024970571312513e-05	8.90400099600973e-06	1.000035616003984	0.9999287698968508	0.0006132717123905	1.7808319467230206e-05	0.999964383996016	2.000071232007968	0.0005776557084068	7.123073808897562e-05	1.9088261798917032	32905.659083882514	0.5354431548919131	19.2446522402615	61453.000032544136	6.50872168533728e-05	1.0001301765519486
e7b0aba3d7684fdbab9489527163d1aa	0.07729430290589355	0.887576158897772	11801.129688163011	0.0003461060469061	0.125744764728715	657.3978477969891	30.77690546285495	0.2741858040207517	0.2561799405182078	0.1073667368031366	0.0662811895953236	30.710624273259626	0.1030576370523361	0.4897454537723983	10.835072327261525	11801.129688163011	0.9999593520720452	0.1646727543642262	1.000032489974737	3.248532240061575e-05	3.248648537033268e-05	3.248881158421728e-05	3.248997473690333e-05	-1.62453e-05	3.248997473690333e-05	0.0005290583275387	3.248881158421728e-05	0.9999837550126316	0.9999837550126316	0.9999935020050528	0.9999891700084212	-1.35695e-06	2.7594677769509818e-05	3.248997473690333e-05	1.0000162449873686	0.9999350217952552	0.0005615483022752	1.6245278162110917e-05	0.999967510025263	2.0000324899747364	0.0005290583275387	1.624469658028015e-05	3.5583574805337475	7921.416080647128	0.1609978472551345	29.988085214190257	49200.00004064875	2.0323963977540388e-05	1.0000609731311736
55ac05ef92fb49738c02875fc73f35cf	0.09230697601665204	0.5557874163196742	18020.279174302308	0.0006326554666315	0.0948811496523011	529.6554225075173	32.66556991437577	0.2788358770433973	0.2441057024860076	0.1270851195812714	0.0543037082292586	32.61126620614652	0.0603624230931258	0.5954748546535295	13.65489551606189	18020.279174302308	0.9999212939279484	0.2768408561980814	1.0000556569022108	5.5644213215071945e-05	5.56473850003831e-05	5.5653729683662645e-05	5.565690221075639e-05	-2.78292e-05	5.565690221075639e-05	0.0008659619651457	5.565372968366264e-05	0.9999721715488946	0.9999721715488946	0.999988868619558	0.9999814476992632	-2.42506e-06	4.727128702305173e-05	5.565690221075639e-05	1.0000278284511055	0.999888690954369	0.0009216188673562	2.7829244260125527e-05	0.9999443430977892	2.000055656902211	0.0008659619651457	2.782765797360476e-05	2.8748538154198213	14448.439472648564	0.2843061682929666	28.80537639384693	50816.00015741834	3.935303602578476e-05	1.0001180637544274
6f52de6531be4123a0b3a6b1ac641958	0.05434650605913454	0.1338091448858757	2367.095495247603	0	0.0254038572720378	520.4766507741406	12.573800876721368	0.1121250662030111	0.0731804873307263	0.069982919473246	0.0354497335448733	12.538351143176495	0.0125035370379955	0.2961244504013383	18.100553611900416	2367.095495247603	1	0.075117659654465	1	0	0	0	0	1	0	0	0	1	1	1	1	0	0	0	1	1	0	1	1	2	0	0	2.467947501645951	9810.451285470845	0.3634308100122562	26.82958050784588	26994	0	1
75a409ce2bba48a2ba1eda0255af6531	0.07900673603525625	1.7660027380645884	117001.4099321924	0.0017944231223537	0.934478117698578	2138.93518056949	90.2083987908011	0.9971546009483372	0.5260450657431295	1.0429190347825623	0.0256900474581787	90.18270874334291	0.3669172932969959	1.3718010887543688	28.476164921964298	117001.4099321924	0.9997748435981688	0.887520928915234	1.0003935442307772	0.005234109961936	0.0018073932058552	0.0007292405621034	0.0005825226830297	0.1156483475685908	0.0003228122940083	0.0031572684188627	0.0005824159814818	0.9998771245421356	0.999864564891898	0.9999715252550992	0.9999435511969432	-0.101547	0.0149751365918281	0.0001404681407559	1.000178416288732	0.9995673704252452	0.0034873649434311	0.1968705519325095	0.9997836568466358	2.000356832577464	0.003250496315098	0.0003279408112833	3.005163876285037	17199.106507543347	0.2766285988925169	27.215772923688203	62160.00112587255	0.0003377304636805	1.0006916074243253
99719fa2fe5042208c70390ade41d5d1	0.06577986276870981	1.3801338917782695	884.9472451402589	0	0.4674653663961713	11.141418173402942	5.0354642520077535	0.488860297736859	0.4598221598904348	0.2059575250434973	0.0364630665561847	4.999001185451569	0.2355441088167987	0.8334393028521422	2.6240688689199496	884.9472451402589	1	0.4556366808352944	1	0	0	0	0	1	0	0	0	1	1	1	1	0	0	0	1	1	0	1	1	2	0	0	4.563691099757849	58.69073783359497	0.0460680830718955	45.29430291619123	1274	0	1
abc74db7c00247b99a1ca444ac85b4be	0.057706981151693745	1.1339059375326648	6442.023315862923	0	0.2197025098993618	22.459206564784576	7.803168217529355	0.3647516679674688	0.3930240930376494	0.1066024869068074	0.0258338547737288	7.777334362755626	0.1561454696136138	0.730774664563216	3.6783115461909097	6442.023315862923	1	0.4009878310824303	1	0	0	0	0	1	0	0	0	1	1	1	1	0	0	0	1	1	0	1	1	2	0	0	3.5581984352538267	1804.300008289812	0.1495730753784143	34.29521726237483	12063	0	1
cbb9255c60ef4e8993020485219e1657	0.11301914076381837	1.5961632917694106	115147.06384802036	0.0012815478839486	0.5859811985541563	1215.3798660231105	58.96310875169857	1.0043091366152448	0.4295262969233749	1.0509376842127016	0.0217422483698236	58.94136650332874	0.2827265920520453	1.24114848258394	19.20358619970651	115147.06384802036	0.9998394727578148	0.5318127139315586	1.0002425387084388	0.0014340567994405	0.000675787153942	0.0003681273484247	0.0003331902449025	0.0512080032233457	0.0002250428125784	0.002538671496957	0.0003331391703314	0.9999055031657648	0.9998982933369434	0.9999716723954633	0.9999491466684718	-0.0286169	0.0043498194175858	0.0001304138092948	1.0001168953802542	0.999655960154252	0.0027381593643996	0.0657251794456441	0.999827961175498	2.0002337907605083	0.002567190267984	0.0001753293983318	2.023724956531691	38161.36883436568	0.5105268141963862	18.168330245469896	74737.00074917391	0.0001605258103955	1.000374586950996
c047c3205ac940439f23dde58c46f9dc	0.07958080559906802	0.3614276387117442	4349.5040643192015	0	0.084882424317718	62.64168817533309	8.266770373446263	0.1888735729129753	0.1241388076061786	0.1129115810228388	0.0662811895953236	8.200489183850939	0.0454840738264149	0.2969249593990922	5.376677105831501	4349.5040643192015	1	0.0524912049692395	1	0	0	0	0	1	0	0	0	1	1	1	1	0	0	0	1	1	0	1	1	2	0	0	3.9497808105588144	5201.454737098147	0.1054334685429551	35.759523103875296	49334	0	1
d19cb9102cac4acb896838ee669dbd4d	0.0443036976664115	1.4405837856071582	2173.4787974727305	0	0.6232124031246546	23.860271151576494	10.436027706439877	0.5199055929957407	0.5098946333960596	0.1998876373313874	0.0167175269940096	10.419310179445867	0.3006899861854586	0.8982121145775323	3.2633495816668843	2173.4787974727305	1	0.5364831771455894	1	0	0	0	0	1	0	0	0	1	1	1	1	0	0	0	1	1	0	1	1	2	0	0	4.390493123704849	150.47809948032665	0.055856755560626	33.60110647599301	2694	0	1
e7c83992b0ce4c599a771c406372bffa	0.04807460815084451	1.4498453147391388	10415.917974004991	0	0.8889528985839923	5.8012455382147285	5.610395341760679	0.5918962032101721	0.5051977963510588	0.3237975090658753	0.019706046097896	5.590689295662783	0.3718545809754348	0.8588778985501474	1.4648088168736777	10415.917974004991	1	0.3873301292432997	1	0	0	0	0	1	0	0	0	1	1	1	1	0	0	0	1	1	0	1	1	2	0	0	3.0432826140682074	3772.478895184136	0.2671727262878283	31.651860620019427	14120	0	1
e8c1f33e02ce4066974223c5ce240a54	0.14509686437515934	1.353415021456695	48097.18161320326	0.0002692649973721	0.8533416676701877	373.59957243028526	36.88460931231477	0.6822851927222581	0.431857919562148	0.5812500543714867	0.0710978392679005	36.81351147304687	0.3474048927224724	0.8621260315437194	6.522637003601166	48097.18161320326	0.999969093831136	0.2777482100572733	1.0000101371117225	1.0136342691182303e-05	1.0136534939792469e-05	1.0136919459048008e-05	1.0137111722348385e-05	0.4615333929345342	1.0137111722348385e-05	0.0001736910668747	1.0136919459048008e-05	0.9999949314441388	0.9999949314441388	0.9999979725776555	0.9999966209627592	0	8.609697771774258e-06	1.0137111722348385e-05	1.0000050685558617	0.9999797260649504	0.0001838281785969	5.068603927352426e-06	0.9999898628882776	2.000010137111723	0.0001736910668747	5.068507795349099e-06	3.1910177345598143	15120.05790360217	0.2336551421489726	35.622735903280685	64709.000030906645	1.545308443196308e-05	1.0000463599697116
49af9e9285014233b8c6c5e312785b7c	0.05285099977113499	1.34640218351824	47859.29615839329	0.0002726481354506	0.4741197688812127	124.02085161230104	36.26742183829695	0.4573707388639689	0.4837540004725403	0.1270134680677566	0.0205425370947182	36.24687930120223	0.261817086165005	0.8658652705869385	5.603262769843233	47859.29615839329	0.999968670206941	0.5405346740396194	1.000006915311145	6.914810806278127e-06	6.914935885291036e-06	6.915186056975611e-06	6.9153111450944e-06	0.6153811576977706	6.9153111450944e-06	0.0001189545418851	6.915186056975611e-06	0.9999965423444274	0.9999965423444274	0.999998616937771	0.9999976948962848	0	5.873345739033196e-06	6.9153111450944e-06	1.0000034576555723	0.999986169565342	0.00012586985303	3.457686844770783e-06	0.999993084688855	2.000006915311145	0.0001189545418851	3.457624300517503e-06	2.918970742409562	17774.997806880132	0.2784478633824195	28.669959453520224	63834.00003133028	1.5664896529514284e-05	1.0000469954257785
cf697119e9a9496fb0dbf10a7d13016b	0.04714132970264435	0.2886862275971318	9649.29360176293	0	0.0659289633298637	168.54699680901817	15.711315082704267	0.1898284595061023	0.1863046128234675	0.0776075547440362	0.022824616581469	15.6884904661228	0.0360872810691223	0.552486631490342	10.446739753419951	9649.29360176293	1	0.2692066339370851	1	0	0	0	0	1	0	0	0	1	1	1	1	0	0	0	1	1	0	1	1	2	0	0	2.9245316424293124	7998.732506643047	0.2530283596938835	30.23905637039794	31612	0	1
d23170e10324421b8e73057a9ebac131	0.05771424950664836	2.0415726131943304	3107.964006152388	0	1.0951736375926686	37.58876971301669	15.931296607763406	0.8608942099262598	0.7268885326381467	0.5071484374981938	0.0184681015777409	15.912828506185663	0.4641406237585546	1.3703736245225029	3.948330144212172	3107.964006152388	1	1.1367850301023823	1	0	0	0	0	1	0	0	0	1	1	1	1	0	0	0	1	1	0	1	1	2	0	0	3.574830740409052	252.94199395770391	0.1528350416662863	33.200300836976666	1655	0	1
e4d4058666f244589cb7dc8425766d35	0.05171710555876052	2.116548185109397	31179.88672080045	0	1.182694282316008	21.905175204449986	15.662712180321524	0.8661467182906325	0.7819345216010102	0.4252285632603895	0.0214531995584718	15.641258980763052	0.5128567367744579	1.4149372540690224	3.178104015586066	31179.88672080045	1	1.2518372953467531	1	0	0	0	0	1	0	0	0	1	1	1	1	0	0	0	1	1	0	1	1	2	0	0	4.029069067329482	1440.032490047515	0.0924638814721661	37.501130581704494	15574	0	1
202ed8f259d74df3a4dc3b66f4a0c4ee	0.051965905500808846	1.5374626775757694	9135.621367532374	0	0.912547091199207	10.273214659831208	7.871875720861958	0.6064715694625201	0.5462880773712218	0.2798229354471431	0.0166892818862058	7.855186438975752	0.3833879155516186	0.9242269993277284	1.9964095204477983	9135.621367532374	1	0.4863877817200046	1	0	0	0	0	1	0	0	0	1	1	1	1	0	0	0	1	1	0	1	1	2	0	0	3.5851784188935585	1799.6326320710612	0.1682685957990707	41.63750168348844	10695	0	1
565acd9760d44c42805ef365344e93cb	0.10221446873195385	1.2085747416467654	29063.513909378416	0	0.4721188092619814	9.99648584553135	7.354329948184494	0.4495793992294584	0.3845414944072961	0.1981232436416816	0.0440645923792307	7.310265355805264	0.2403020320700251	0.6793983015010859	2.172371493355822	29063.513909378416	1	0.2594604158710397	1	0	0	0	0	1	0	0	0	1	1	1	1	0	0	0	1	1	0	1	1	2	0	0	3.363885299389166	12412.123481299135	0.1971273482299552	39.07147172934582	62965	0	1
d2b71da4cd3e4e57bf0996c7f0899c9e	0.10942385899821772	0.4134659539444946	3887.1713929171074	0	0.1016875264320159	74.43912864093882	8.244653355220047	0.2401338228562979	0.1434147136328194	0.1549356271883699	0.0681428655127814	8.176510489707265	0.0513059704247286	0.3721043072547846	6.344684337780738	3887.1713929171074	1	0.0807973625979832	1	0	0	0	0	1	0	0	0	1	1	1	1	0	0	0	1	1	0	1	1	2	0	0	3.7139312813145953	3725.085132150744	0.1326880790820953	38.025194073719085	28074	0	1
e9d4ba60799044a3916a4715030f304d	0.04752909388859532	0.9958880046232292	28636.987546563047	0.0082223107093511	0.2753225661533865	1375.3825228050775	166.33273815920165	0.5069309259982803	0.590105919250504	0.1327226334892434	0.0201401173506327	166.312598041851	0.146591309431745	4.439467266714001	36.595179645969495	28636.987546563047	0.998624484833098	19.45189064849161	1.0007973925676197	0.1716422289993988	0.0286317581694483	0.0047802211196356	0.0047843554057173	0.8460873680504771	0.0007973925676195	0.0015441213749594	0.0047802211196356	0.9998860867760544	0.9998706930971428	0.9999437134658152	0.9999386621101832	-7.60023e-06	0.0001128981938663	3.691632257497968e-06	1.0003986962838098	0.9997343747393802	0.0016770201362293	6.647810336905193e-05	0.99986710123873	2.00079739256762	0.0015441213749594	0.0023911441313382	4.292379285365806	93.68547832071576	0.0644772734485311	29.822503598648925	1451.0013764624914	0.0247592730042359	1.0330350997935307
614832a04cb44908a00a1c117a770e92	0.04793959242151469	1.593620237916055	24881.30258711961	0	1.015747887568443	35.8412031314964	20.78662456284212	0.6846454234995989	0.5645892175850128	0.4313147201489854	0.0156226023180954	20.77100196052402	0.4236658486406318	0.989736753895996	2.6313579259847906	24881.30258711961	1	0.5108394860936383	1	0	0	0	0	1	0	0	0	1	1	1	1	0	0	0	1	1	0	1	1	2	0	0	3.6789650016446895	3532.8341732283466	0.1390879595759191	37.18740677661355	25400	0	1
7108d4dc647e41679fc180e281ec27eb	0.06668594167134106	1.7142164872227774	16921.459689199903	0.0012885170948587	0.9615953933841266	374.9244177168975	34.487179041202474	0.9446649148198304	0.5231029258503895	0.9576491030520224	0.0090139531530786	34.478165088049394	0.3812591986812265	1.2078899272381969	9.48482497913298	16921.459689199903	0.9998275713436388	0.5666062750319381	1.0002015428116322	0.0002013797703085	0.0002014205099484	0.0002015020388855	0.0002015428116319	-0.000100782	0.0002015428116319	0.0027644441649168	0.0002015020388855	0.999899228594184	0.999899228594184	0.9999596914376734	0.9999328190627892	-9.88024e-06	0.0001711833583507	0.0002015428116319	1.000100771405816	0.9995969755358558	0.0029659869765485	0.0001007816000372	0.999798457188368	2.000201542811632	0.0027644441649168	0.0001007612126293	2.6839632658915127	3828.235557854802	0.3300772165765479	26.13288336248875	11596.000172443524	8.621432818051621e-05	1.0002586652871184
8b1810c1ca624c94a8e6df710e26d20d	0.04760105647347304	1.8590489244175847	56081.66089723555	0.0030323232038953	1.0704409032939923	2067.814796803831	90.6249537043233	0.7755299104430254	0.6695475347979662	0.4384787184142302	0.0139170826764484	90.61103662164686	0.4520100847825475	1.4928355413095584	32.90785205096922	56081.66089723555	0.9996026763792112	1.6271113114052345	1.0002084066847352	0.0036173036692721	0.0012010718635096	0.0004420820869454	0.0003962679682263	0.0191813351282872	0.0001892868107733	0.0017450735986747	0.0003962012328996	0.9999324680780756	0.9999260547103588	0.9999822194825776	0.999968197966776	-0.0245966	0.0028216819294643	7.792907240424785e-05	1.0000984673801792	0.9997693484570443	0.0018680592847585	0.0385115617611458	0.9998846622635004	2.000196934760358	0.0017527215482594	0.0002095875137929	3.754022228174518	3245.6335783826744	0.128974113983019	35.102617571633026	25155.00135108285	0.0009535476346871	1.0017484601629247
8b219576536a4eb4b09540dd115c68eb	0.08302791037693685	0.4029134712271598	9361.160421626571	0.0003443193852022	0.1182272230852143	21442.40799637531	69.25110043470355	0.2069332875789343	0.1320617398073669	0.1265408910666412	0.0662811895953236	69.18481924510822	0.058305464662362	0.4349562842085885	119.68623085444052	9361.160421626571	0.9999595812618892	0.1463655836643164	1.0000201961107795	0.00016155187037	8.077806202793837e-05	4.039115802534481e-05	4.039222155911301e-05	0.6153795662904488	2.0196110779556506e-05	0.0001682097720141	4.039115802534482e-05	0.9999932679630734	0.9999919215556882	0.999996892906034	0.9999959607778444	0	8.576548046608806e-06	2.524513847444563e-06	1.00001009805539	0.9999798042880456	0.0001783078274037	5.049094166534763e-06	0.9999899019446102	2.00002019611078	0.0001682097720141	2.0195844896114452e-05	3.896718126015315	5183.045350740688	0.1047481932608615	31.235717258267066	49479.00004041955	8.083747622097448e-05	1.0001616782199227
9e1997390e0849a193757ef3107e0141	0.08343730134026803	1.5222337561589971	50379.389580719086	0	0.973096407914702	10.462775288422536	13.879800877688366	0.7873522437414621	0.4939473430337786	0.7829983715416884	0.0303847095730333	13.849416168115331	0.3885108770963048	0.9874129410153158	1.066115000409377	50379.389580719086	1	0.3550607603598005	1	0	0	0	0	1	0	0	0	1	1	1	1	0	0	0	1	1	0	1	1	2	0	0	2.6893085876415137	17626.66747948599	0.3411260930385119	26.38021718016445	51672	0	1
4c18fdde40c84dab8261a5da8ef3612f	0.03102451520234215	2.1631632814876385	1442.3991778362888	0	1.1837803145352923	9.791465872557575	7.57239338807972	0.7500326180465117	0.807302660112114	0.1789825382470472	0.015352752655417	7.557040635424303	0.5191931818006267	1.3166825198111762	2.27178711842363	1442.3991778362888	1	1.1711039298426038	1	0	0	0	0	1	0	0	0	1	1	1	1	0	0	0	1	1	0	1	1	2	0	0	3.9404801359836776	81.5889423076923	0.0980636325813609	36.83408260909764	832	0	1
80b056a2a4794589a13bd249dc28d557	0.04697609664735309	0.3126044234318758	14928.814113528637	0	0.0417640776490496	100.67746882680174	12.17759911703416	0.1968824941535175	0.2194307902799776	0.0639366109813253	0.0219032669039907	12.15569585013017	0.0308593150343464	0.5866010747279014	8.262832983491633	14928.814113528637	1	0.3053381043678191	1	0	0	0	0	1	0	0	0	1	1	1	1	0	0	0	1	1	0	1	1	2	0	0	2.8392476331403307	13077.598132995276	0.3014313272558551	28.08112572014395	43385	0	1
59b717110348417b97c7c6bea58f085b	0.048066918678044857	1.3632061142168874	319112.43905560154	0.0048810696971238	0.4426159131109797	5885.690274136468	268.5176511710219	0.4939755717712981	0.5399316330317463	0.1280855351734158	0.017532134227153	268.5001190367948	0.2447578823680739	2.850561118901904	71.2605352125674	319112.43905560154	0.9993889852039656	7.881686827088489	1.001754354208387	0.9601529021160388	0.0836161658729304	0.0082687274011641	0.0053311612900427	0.1010349340019149	0.0008291348527746	0.0029429127034252	0.0053301855007489	0.9998598834764856	0.9998404650553052	0.9999705358285448	0.9999509454191432	-0.0943914	0.0124019886169486	4.348480048117397e-05	1.0005097780684382	0.9996194415065438	0.0032242760897722	0.1654791999776735	0.9998096926569426	2.0010195561368764	0.0030340352435998	0.0033999721728017	2.5993296481394683	12342.905683438585	0.3142927705092326	26.74608770849672	39248.00422693013	0.0101831926310428	1.013139132206152
812f420f92bf40288d0c2f3d2bb334c0	0.056466310207548276	1.4594966564224974	972135.3723223236	0.0028404439291334	0.8662449859868393	14304.51452369737	527.2706241134617	0.5799015188474216	0.5726760022470209	0.1855361094180151	0.0209213347090305	527.2497027787527	0.3666572717882952	3.339890041146768	112.42928427906098	972135.3723223236	0.9996557983108224	10.818579715389804	1.003719704215397	9.994860332957511	0.4345840659417367	0.0213344352197202	0.0116365798524157	0.2644167278044871	0.0009635669354348	0.0025108315506607	0.0116355713950281	0.9998903196016368	0.9998816255139176	0.9999832832031326	0.9999708771738682	-0.271819	0.0247432024688556	6.146855922499887e-05	1.000647398028296	0.999690499805841	0.0027436902685659	0.4719461041320572	0.9998452362977238	2.0012947960565923	0.0025869919131601	0.008242753768034	1.9531030299520868	42504.74273944624	0.4877249622995815	20.937478413225055	87119.00316698987	0.0152024494366923	1.0175676140862202
3d0199ab1ff541909ce3a0991a41ec66	0.0946170144109354	1.5621960997415634	23041.593082615247	0	0.9466515769833276	4.425117130902289	5.532172518435325	0.8612263273341434	0.4823387808223587	0.904274433148467	0.0167061707997375	5.515466347635588	0.3691903941034755	1.046734684117986	0.6838612012691936	23041.593082615247	1	0.3539427120421228	1	0	0	0	0	1	0	0	0	1	1	1	1	0	0	0	1	1	0	1	1	2	0	0	3.1431189573805183	5248.861531145982	0.2495892311529235	35.89466035998208	21030	0	1
a517ef3f1d9845e7934dda7b1589a513	0.0875475160778315	1.2460395903882453	26524.39762247729	0	0.8891294822097331	8.988564456889081	12.302228249964106	0.5232211845325486	0.450997055624959	0.214994869563299	0.0662811895953236	12.23594706036878	0.3696748754066327	0.7316089751451322	1.2005629897557464	26524.39762247729	1	0.2614912845692674	1	0	0	0	0	1	0	0	0	1	1	1	1	0	0	0	1	1	0	1	1	2	0	0	3.413542520968893	9376.85281000908	0.1892211242056115	33.399510644636365	49555	0	1
a63c74a39e104ed8a319140925b06350	0.1360602421801332	1.2227270706496831	30516.20371193422	0.0022797426891038	0.5180064572373303	9449.419350048958	150.04159472741847	0.5487113019114924	0.3859025423266048	0.3413805178337438	0.0647911065415588	149.97680362087692	0.2325825455661821	1.5157707240256184	89.97811897552677	30516.20371193422	0.9996988745474474	1.996476794967744	1.001430114617826	0.2687082488963227	0.0443782280753037	0.0074598588919099	0.0072279777338357	0.012512391546224	0.0013520894351982	0.0049822010455903	0.0072258427013358	0.9997459837675008	0.9997227996753536	0.9999131619578906	0.9998876440469944	-0.0466548	0.0047727493245244	0.0001728087770203	1.0006857978654276	0.9992676509926524	0.0053484736657961	0.0545669633751238	0.9996337273797936	2.001371595730855	0.0049822010455903	0.0036719591564364	4.352469835800322	809.3982833910555	0.0609394882842234	34.865320022970835	13278.000451739195	0.0027854472817773	1.003839783165186
c1fbf9db9782495ba54c8d29843fb4bc	0.10605634849449784	0.3713833298037828	2047.1608788347655	0	0.0824806356486996	61.10337254283555	5.346511794311406	0.2240564683094857	0.1287069584436188	0.1503168458457388	0.0677086265594375	5.278803167751969	0.0417156723635751	0.3475700815290406	6.269957102533112	2047.1608788347655	1	0.0706036605827843	1	0	0	0	0	1	0	0	0	1	1	1	1	0	0	0	1	1	0	1	1	2	0	0	3.042868381720716	3845.4707895668594	0.2269249846315861	30.6043651769412	16946	0	1
093c5bc73d5d458b8fedba2f386f69a6	0.04775974282698408	0.804724612184151	16070.972444455045	0.000413482576325	0.1109799182056242	180.3602243655049	27.00632485670021	0.2739617534130122	0.3041712128252888	0.0809476582040411	0.0223268510192844	26.983998005680927	0.0864522613709441	0.6298851926023903	7.688803304860381	16070.972444455045	0.99995062581779	0.321700313526618	1.000058915824008	5.890187582630251e-05	5.8905362353402864e-05	5.891233665149413e-05	5.8915824007867217e-05	-2.94588e-05	5.8915824007867217e-05	0.0009126172106324	5.891233665149413e-05	0.9999705420879962	0.9999705420879962	0.9999882168351985	0.9999803613919974	-2.57738e-06	5.003922673380105e-05	5.8915824007867217e-05	1.000029457912004	0.9998821735830188	0.00097153303464	2.9458783868701165e-05	0.999941084175992	2.000058915824008	0.0009126172106324	2.9457040164840332e-05	2.7667557953178785	13016.248901397325	0.3213412556509486	31.86286277922648	40504.0000493754	2.468709110500697e-05	1.0000740631017626
2cf99d2eb6cd411facafdf232668ee63	0.05515481484896471	0.174751365534903	239.6695589455526	0	0.043153741492131	153.65995095527074	3.6437173454220417	0.110655236723393	0.056002482970303	0.0796050656946748	0.0351195295117147	3.608597815910327	0.0207239450799619	0.1697960363693604	9.56967559642282	239.6695589455526	1	0.016586112552435	1	0	0	0	0	1	0	0	0	1	1	1	1	0	0	0	1	1	0	1	1	2	0	0	3.752042241470831	977.3909539275832	0.1175737945299631	46.235492942729735	8313	0	1
2515b907ae4942afb5e8be0f5c0f15e9	0.04471085948747894	1.3179480798957453	18064.97135999543	0	0.7638678634983064	101.23611182126535	24.742991950128324	0.4574951368924345	0.4730738887059	0.1227623919612514	0.0180754077033794	24.724916542424943	0.3280911645427305	0.7654641102474479	4.298416910103438	18064.97135999543	1	0.3766335037966898	1	0	0	0	0	1	0	0	0	1	1	1	1	0	0	0	1	1	0	1	1	2	0	0	3.014254313261917	8481.027310174824	0.2750811621476703	32.72580365559323	30831	0	1
897c2bfa0b764b79a0af0a36e666ad9f	0.04195058826099924	1.3450818815163683	160.72205548998892	0	0.4832980200898445	7.740783381141601	3.1635016307749573	0.4479025085672763	0.4486345504824987	0.169699059088718	0.0174458903162533	3.146055740458704	0.2418271221575574	0.7729681495287063	2.2121478965806576	160.72205548998892	1	0.3968631030049733	1	0	0	0	0	1	0	0	0	1	1	1	1	0	0	0	1	1	0	1	1	2	0	0	4.4508914760636165	13.869888475836431	0.0515609237019941	36.28946531971642	269	0	1
d9ceccd43cc7476bb8c0eb7be09c8b3d	0.039209221229156876	0.2212818857435009	416.3863355700177	0	0.0571780582300653	162.59884088779958	6.457205734561421	0.1219578697340056	0.0958842834480687	0.0643173074325971	0.0199964699218773	6.437209264639543	0.0297842807389737	0.2570245342919416	9.6950355814787	416.3863355700177	1	0.0511878892379327	1	0	0	0	0	1	0	0	0	1	1	1	1	0	0	0	1	1	0	1	1	2	0	0	3.8322353095897608	706.753450737744	0.1121296923271051	44.28383186195846	6303	0	1
2dc45a0a29194e47bbf6ad525177fe35	0.1051998805297569	1.4324345478458225	31765.99296794148	0	0.910720387317082	13.24908514327014	9.505714217205211	0.7866148313372767	0.4755578318102657	0.7999863780494573	0.0174438085732035	9.48827040863201	0.3682778114241889	0.9869893746314088	1.6188276852083154	31765.99296794148	1	0.3553851327555273	1	0	0	0	0	1	0	0	0	1	1	1	1	0	0	0	1	1	0	1	1	2	0	0	2.344454891108116	13633.837314851728	0.4181004420513272	24.246553664363454	32609	0	1
5b64270a54c24d298204c1fe6c234967	0.0547614969511543	1.5929422293512217	77259.45774020045	0.0002688344492508	1.1118401854327424	59.626036412030665	29.95309452348293	0.7679971451038344	0.6016045824093209	0.7161869391565651	0.020897126852031	29.932197396630897	0.4701473664087314	1.091711574707519	3.267552721108938	77259.45774020045	0.9999691477053678	0.6020145474627308	1.0000089122648466	8.911674304531952e-06	8.911821933984683e-06	8.912117207577245e-06	8.912264846821419e-06	0.4615340053691281	8.912264846821419e-06	0.0001544026807082	8.912117207577245e-06	0.9999955438675764	0.9999955438675764	0.9999982175470308	0.9999970292450509	0	7.569401094136011e-06	8.912264846821419e-06	1.0000044561324233	0.9999821756917652	0.0001633149455548	4.45616933338129e-06	0.9999910877351532	2.0000089122648466	0.0001544026807082	4.456095513599666e-06	1.7942420888262558	36429.30911390843	0.5619725582177655	17.650014665251284	64822.00003085277	1.542614731603589e-05	1.0000462791558682
6c83c42cc485404181e6200cc02d3437	0.06392944351545952	1.1534325922172064	21427.03278899361	0	0.304847533519058	14.184460135968502	8.074406928210365	0.3751550996392762	0.3782108511502906	0.1213481992041866	0.0506394684049408	8.023767459805425	0.1993317035497868	0.6590006540174692	2.76640169480086	21427.03278899361	1	0.2935405132100966	1	0	0	0	0	1	0	0	0	1	1	1	1	0	0	0	1	1	0	1	1	2	0	0	3.2273034482326683	11158.382638480714	0.2261574543156674	33.36692168750128	49339	0	1
8c323d632cfd45d6aac4ac50b5c6c38b	0.07326566891930246	1.860649272872493	9193.407450843366	0.0052390683227955	1.0061889500897292	1030.5618496146503	70.18773943373036	0.8550740273230513	0.7040541584204915	0.5029069648956923	0.0288254845196063	70.15891394921076	0.4327302705710964	1.948681488047784	27.045198208105983	9193.407450843366	0.9991742363093414	3.066207949657664	1.000397469936685	0.0031711825829613	0.001586661507666	0.0007944032470049	0.0007949398733701	0.6922082912725008	0.000397469936685	0.002386398141469	0.0007944032470049	0.999867510021105	0.9998410120253258	0.9999388507789716	0.999920506012663	-1.10304e-05	0.0001688184211681	4.968374208563724e-05	1.0001987349683428	0.9996027312982018	0.0025851331098114	9.940103519152338e-05	0.9998012650316574	2.000397469936685	0.002386398141469	0.0003973357800937	4.306162510571648	146.97521685254029	0.0607084745363652	41.04162139041885	2419.000826104915	0.0016515273813173	1.003304419661297
f9d6ebed169f4f528cb741698ed46ad3	0.07408918311606824	0.5019743055638994	16389.096536206453	0	0.1294073091768723	101.46729517420744	15.295429633447013	0.2531278047163389	0.2093286192836795	0.1241523010563484	0.034155044552755	15.261274588894258	0.0685484488608655	0.5013031432095574	7.331255997558177	16389.096536206453	1	0.1872311558712689	1	0	0	0	0	1	0	0	0	1	1	1	1	0	0	0	1	1	0	1	1	2	0	0	3.394746232637588	11380.29928238469	0.1745016450316592	37.65306054501848	65216	0	1
5c05695838b146468156e5d6ea991443	0.055228276917333854	0.2346581818987835	4854.247798836616	0	0.0542063643021412	79.839747944781	5.769704322439616	0.1445226457629556	0.1070162501029976	0.0805384045862748	0.025970387920482	5.743733934519134	0.0281239255100168	0.2901758834654498	7.41199716010928	4854.247798836616	1	0.0633152482066295	1	0	0	0	0	1	0	0	0	1	1	1	1	0	0	0	1	1	0	1	1	2	0	0	3.306664625939862	11080.03916738942	0.192194955201898	38.09882683086996	57650	0	1
6f085ae1adf54dc888a3a2f83b015371	0.04682087019790047	0.5683691041457593	186.7302840568341	0	0.2021893879791398	41.755986447870896	5.270392296086506	0.2641396779330195	0.2312449247172326	0.1246110257691151	0.0278638986893632	5.242528397397143	0.0957709844803539	0.495353288568051	5.057873779881281	186.7302840568341	1	0.1756051110366235	1	0	0	0	0	1	0	0	0	1	1	1	1	0	0	0	1	1	0	1	1	2	0	0	4.1226004372102025	49.45466491458607	0.0649864190730434	22.12253397821872	761	0	1
72679afb438c42cbb384ac26ae326355	0.056556460237372506	1.1443808485263849	3569.968448520533	0	0.2956792909083572	14.022545343016183	6.998572372853291	0.3680843834323964	0.3841229337493154	0.1087181842900257	0.0327420236035213	6.965830349249769	0.184407460464188	0.6775262707570593	2.857954794488012	3569.968448520533	1	0.3235557342391605	1	0	0	0	0	1	0	0	0	1	1	1	1	0	0	0	1	1	0	1	1	2	0	0	3.982700512619535	711.7681625305388	0.0915222016883809	46.01382493546109	7777	0	1
bba150e4547b4a22a7c195e4d33a8933	0.04022179944167574	1.5369764240448067	11626.278043313072	0	0.9053464831501804	12.009227826123698	9.122618263321934	0.5705886160161606	0.5911485128185742	0.152310868966243	0.0212325457825316	9.101385717539404	0.390041509264639	0.9749259184058144	2.420878101173972	11626.278043313072	1	0.6249091776521829	1	0	0	0	0	1	0	0	0	1	1	1	1	0	0	0	1	1	0	1	1	2	0	0	2.7452540494414244	4297.662524525834	0.3513458571391296	33.38479766160316	12232	0	1
c576a0ca2ab84b01a34bdf5d3925ae3c	0.05764571922776469	1.8373103053059197	24832.00975288305	0	1.1165930355854798	9.765248682778124	9.838249748485898	0.8175182353194457	0.6431714603984506	0.6032343026688773	0.0181636516608752	9.820086096825024	0.4677010544501455	1.1698748819709988	1.8901514985283647	24832.00975288305	1	0.7002711743868382	1	0	0	0	0	1	0	0	0	1	1	1	1	0	0	0	1	1	0	1	1	2	0	0	3.72340088338185	2457.3903218694886	0.1354381791153818	34.710664466260894	18144	0	1
d9877046c0e74574901da7db874189bd	0.04893589428323719	0.1645876568723553	662.0393581902154	0	0.0362727557932408	249.13328596238804	6.551821385471731	0.1114596238999214	0.073674437860963	0.0681975073144479	0.0299251831134048	6.521896202358327	0.0188324785923301	0.2395392233811967	12.657614066208373	662.0393581902154	1	0.0449557917781549	1	0	0	0	0	1	0	0	0	1	1	1	1	0	0	0	1	1	0	1	1	2	0	0	3.6061262323112535	1635.894262437164	0.141783174071517	31.721611204541784	11538	0	1
ecf160b28b7e44eb828f00141514131f	0.053248634310475745	0.7979666848524573	6067.760507112422	0	0.1305081762868509	33.60051885407522	8.493870638600292	0.2844027832945994	0.3081859402853683	0.0847139686682038	0.0310996727480018	8.46277096585229	0.0962028166065466	0.6166111562987537	4.557246985502464	6067.760507112422	1	0.2993243749263712	1	0	0	0	0	1	0	0	0	1	1	1	1	0	0	0	1	1	0	1	1	2	0	0	3.9134614909552616	1717.2458800676734	0.1076036017336721	44.390373467859504	15959	0	1
0835f49d4eac4edd883f5820888c2646	0.12321440496328287	1.1611345074881143	32940.162040027164	0	0.5923554907581209	26.85507055742123	16.29760039591164	0.473566289753161	0.3607780443999092	0.246867298470158	0.0730419942650938	16.224558401646547	0.2602587745919494	0.6498494868702545	2.054786696043608	32940.162040027164	1	0.1980393247949581	1	0	0	0	0	1	0	0	0	1	1	1	1	0	0	0	1	1	0	1	1	2	0	0	3.156773742808888	17439.85134805964	0.2235849713216451	32.19371616240713	78001	0	1
e505753606804a1e85764fe595244cd3	0.04179511624189182	1.180745119245319	637.8602125666607	0	0.4183454498271026	9.958502618101242	4.849561468130579	0.399342312992059	0.3888810900482125	0.1590407204503655	0.0221945829117541	4.827366885218825	0.2218771213817117	0.6706943397984669	2.316476102178381	637.8602125666607	1	0.2903566144918539	1	0	0	0	0	1	0	0	0	1	1	1	1	0	0	0	1	1	0	1	1	2	0	0	4.284939308392922	89.49929478138223	0.0631165689572512	28.10475828607009	1418	0	1
ec25ddde70004a8e8773b3f9b5b2ffa2	0.057343264325880834	1.429518231353265	15555.446370698182	0.0011356217679209	0.6027792835285386	738.9585713275762	33.5275008994135	0.90927514647851	0.400102928842518	1.0175839050449282	0.0081044618979949	33.51939643751551	0.2860929983278107	1.0799711731917938	13.095322515033509	15555.446370698182	0.9998500524824744	0.3395564429217436	1.0000584762133673	5.845642223674428e-05	5.8461368970657096e-05	5.8471264955371374e-05	5.847621336724556e-05	0.3076630683484688	5.847621336724556e-05	0.0008755389476867	5.8471264955371374e-05	0.9999707618933164	0.9999707618933164	0.9999883047573266	0.9999805079288776	-2.64103e-06	4.966617006335872e-05	5.847621336724556e-05	1.0000292381066835	0.9998830549958831	0.0009340151610537	2.923934383887157e-05	0.9999415237866328	2.000058476213367	0.0008755389476867	2.9236869580654228e-05	2.5165445419317667	5244.688235735172	0.3932434757243138	26.33202234759963	13335.000149958762	7.497375876278996e-05	1.000224938142011
f5c9f7fc0a4b44f2b03da785dcaaabb6	0.0559896143365848	1.5058257313146062	52781.76127260125	0	1.0215293798026777	5.446795002516491	9.258841262540637	0.7317973191094641	0.521973070612239	0.6873284767661717	0.01419185996626	9.244649402574376	0.4169101866171368	0.9591452370450362	0.9737747246609478	52781.76127260125	1	0.3844322694903795	1	0	0	0	0	1	0	0	0	1	1	1	1	0	0	0	1	1	0	1	1	2	0	0	3.03182806350864	15475.794785094293	0.2697353293320021	31.202266413352863	57374	0	1
fe5ceee5f05b4863bdcd1730017fb8f8	0.08571087729381992	0.3913370272575105	4840.130157342976	0	0.0907333709071979	30.359961889116708	4.063231956635493	0.2016754386967253	0.1344121101959609	0.1181150535702416	0.0662811895953236	3.996950767040169	0.0495295026872864	0.3140304915075001	4.43662740082027	4840.130157342976	1	0.0579421670229255	1	0	0	0	0	1	0	0	0	1	1	1	1	0	0	0	1	1	0	1	1	2	0	0	3.7309130544484255	6373.169026710947	0.1298500239748772	31.37486680333777	49081	0	1
80b5f531a67a4bf39e74210ccd025b04	0.059803886510339146	1.3868594944853554	38621.71715588986	0	0.7053130432079848	13.719456883212173	10.93987247735604	0.4974933383951012	0.4923188166451597	0.1599949859404539	0.0244917134121819	10.915380763943858	0.3208368559315215	0.8174819458024793	2.387438755979329	38621.71715588986	1	0.4207771099655051	1	0	0	0	0	1	0	0	0	1	1	1	1	0	0	0	1	1	0	1	1	2	0	0	2.873253398455448	17144.06258543422	0.2966460053195754	29.333509197178078	57793	0	1
99a69eb62d6d49c3ada28d18df1f4d9f	0.049204677909386464	0.4475944097818093	1948.9357027263811	0	0.1132595826506894	40.55679571143899	6.100151123633395	0.2047565609807398	0.1884025949943887	0.0851519533831066	0.0268731645554685	6.0732779590779264	0.0618582725382313	0.4140901785110656	5.1503560637539705	1948.9357027263811	1	0.1295454266746667	1	0	0	0	0	1	0	0	0	1	1	1	1	0	0	0	1	1	0	1	1	2	0	0	3.381853807593778	2001.0679218722505	0.1760573571944616	37.26268152553672	11366	0	1
54d2ea1d29474747a4f4c7a9758a8276	0.05610005591514154	0.9093737349467954	5603.149217562954	0	0.1755620534160185	23.845274876944156	7.108364218446298	0.3079639645874767	0.3196785212384921	0.099809213947876	0.0267231646100221	7.081641053836276	0.1182907656074758	0.6109375462537275	3.805282190739088	5603.149217562954	1	0.2784028819380888	1	0	0	0	0	1	0	0	0	1	1	1	1	0	0	0	1	1	0	1	1	2	0	0	3.678289516745661	2102.337330135891	0.1400437869794758	43.56322951231341	15012	0	1
6e8f8dfffd16459db315750a74d4585a	0.04558937108571069	0.200808187385658	815.6056388053763	0	0.0409108824459039	550.5747244541373	15.118877180471486	0.1360871985996023	0.1179828943398574	0.0654979014923948	0.0211002862577886	15.097776894213698	0.0227141710465292	0.4388472714954786	19.455419130730814	815.6056388053763	1	0.1740672020763386	1	0	0	0	0	1	0	0	0	1	1	1	1	0	0	0	1	1	0	1	1	2	0	0	3.3326035148312863	697.3093270365997	0.1646539142943565	38.57228387154329	4235	0	1
8960959da87d45f58ef4f59459d16dd1	0.05033937941353429	1.522019724768884	10793.607199686769	0	1.0371281880270098	5.6711816027502735	6.267542877446029	0.6945839311574981	0.5522153173976707	0.5134603893129985	0.0256123332968118	6.241930544149217	0.4321784611705537	0.961100816566712	1.2481210722525913	10793.607199686769	1	0.4412679421829965	1	0	0	0	0	1	0	0	0	1	1	1	1	0	0	0	1	1	0	1	1	2	0	0	2.549070722733509	4466.2587077449725	0.3822215410992702	26.20761648529937	11685	0	1
341bdd0908014d049efa357712a3673c	0.06416453537850739	1.1390984620214364	65229.332942465306	0.0008663671480167	0.302040661167074	3126.669658917683	86.90959618805394	0.3754978023860126	0.3784202406566466	0.1237543765846482	0.0252789508986666	86.88431723715527	0.1990405121254478	0.7603558172133548	30.75012728820699	65229.332942465306	0.9998936464070226	0.4371423691734636	1.0001652907903378	0.0018656129963641	0.0006932723443827	0.0002960933098003	0.0002768747644986	0.0337375899154251	0.0001508575461583	0.0016660845498788	0.0002768518586875	0.9999403233792136	0.9999371729487548	0.9999872713823708	0.9999734289827208	-0.0555507	0.0070422319716397	9.018258917964656e-05	1.0000802398544724	0.9997726913728904	0.0018614876275632	0.0991597505681654	0.9998863371118952	2.0001604797089447	0.0017526358208523	0.0001432420185747	2.8111630084461723	35037.94471132541	0.3105484969007622	29.47367601084153	112814.00054951872	0.0001240798464437	1.0002658961586868
4eb15d9468be48de8490424dfc9eb81f	0.0554462698469801	0.1972498771434507	2472.9178448606	0	0.0383436430790362	72.32223345671274	3.6687802422253206	0.1233255870721692	0.0806782076324408	0.0759137957262708	0.0426741969333115	3.626106045292009	0.0207494243552065	0.2228921879568636	7.136265984850522	2472.9178448606	1	0.0344717270255026	1	0	0	0	0	1	0	0	0	1	1	1	1	0	0	0	1	1	0	1	1	2	0	0	2.798034704430296	15658.08923979428	0.3145710631588371	28.421602330352545	49776	0	1
b9823ae587ac4866b2f4fa7da39a7c3b	0.03797254897906628	1.2023169351917589	2211.7260603263258	0.0359255807831667	0.3739060093854167	195.71837773881384	31.789733496062052	0.5435582726803089	0.6293446665782078	0.1313395488696579	0.01959462753373	31.770138868528324	0.2030185399642222	2.046674159277535	13.064272935268898	2211.7260603263258	0.9924529384756656	3.893419518455204	1.0063180525702025	0.0096240110865287	0.0075172780999402	0.0065389073158012	0.0054879474235507	0.2792947739047938	0.0054879474235507	0.0462023852128959	0.005440063092895	0.9972560262882246	0.9972560262882246	0.9989024105152898	0.9981706841921498	-0.0393003	0.021250444687205	0.0054879474235507	1.003020675427326	0.9885465095374288	0.0543338937667316	0.0537603566184945	0.9942353508608988	2.006041350854652	0.048845946343181	0.0030067136848379	3.985045250078828	38.71212121212121	0.0733184113865932	16.59089474288338	524.0151515151515	0.0037735307621671	1.0113636363636365
c0379e9101e54a01b83a540c6d49b261	0.2100293004180261	1.5202988433299804	596337.1979201719	0.0036382036547478	0.4564084689702824	12362.624396132824	492.9767500397337	1.0588451369121594	0.3862310277552036	1.062641184636958	0.0378354389429493	492.9389146007907	0.2161203328205645	3.478084345448995	101.9950515289444	596337.1979201719	0.99955377393677	10.975917690094832	1.0022925194524617	5.609453106947246	0.2974136039864963	0.0185237281774001	0.0153444956610923	0.0621395808634015	0.0013830358859167	0.0032475048418771	0.0153424556908363	0.999842969050414	0.9998264621544082	0.9999739195777556	0.9999540632030732	-0.0659325	0.0046404149050747	4.587817562027624e-05	1.0007485644032257	0.9995970836161756	0.0034782738372377	0.0770189189003992	0.99979851845084	2.001497128806451	0.0032784221869442	0.0084670559596231	2.450798564744494	19521.87183544304	0.3960133040295975	20.79577049860412	49274.00283998702	0.0154960816159095	1.0184193443687115
36c8b5c98b6a4f3ab6642b29210a3023	0.056919031114068507	0.5561338358963055	10881.394856457557	0	0.0896795375525021	120.91502590719372	23.36567984864621	0.2811638392034016	0.3095177039062283	0.0897717393950022	0.0264270998868674	23.339252748759343	0.0622602338901835	0.7413829488822529	7.821004635538832	10881.394856457557	1	0.4705955724177489	1	0	0	0	0	1	0	0	0	1	1	1	1	0	0	0	1	1	0	1	1	2	0	0	3.2921715787439734	3929.946810122746	0.1985122397394931	37.17305090268795	19797	0	1
76b8036ef7b64302a31ff25449f15ffc	0.003121051902025448	0.2967068877876883	60.80872028727132	0	0.0528233556265265	55.78054572106224	4.989030426113271	0.1428440951677756	0.2012859780959437	0.015662965060751	0.0013291065888963	4.987701319524375	0.0398220558537589	0.4808449482007241	6.446309077203246	60.80872028727132	1	0.2108074286858565	1	0	0	0	0	1	0	0	0	1	1	1	1	0	0	0	1	1	0	1	1	2	0	0	3.406894495424872	27.67680608365019	0.1052350041203429	7.451199236652258	263	0	1
c40347e659a241d3ba8837d217a9b299	0.06806100368745668	1.0173012660945029	8351.05541400373	0	0.2199497326057633	58.34078561076367	16.146350219251758	0.3769462112386801	0.394810102780998	0.1175015165531014	0.0343681809774872	16.11198203827427	0.1415263704510505	0.8072246834723481	5.539635640007126	8351.05541400373	1	0.5095232434398369	1	0	0	0	0	1	0	0	0	1	1	1	1	0	0	0	1	1	0	1	1	2	0	0	3.8083983473678793	1539.3222534332083	0.1201094142816174	38.45970412296739	12816	0	1
b46f4709c35b47149b0eaf0b0ffdcc89	0.030833240868512024	0.1226417720163468	5947.818495087043	0	0.0247526920063058	531.8885034601121	22.00042837531184	0.1086758023996967	0.1103614189847722	0.0443739134321646	0.0155131911982015	21.98491518411364	0.0131016872962431	0.4445539407573889	18.152461328738077	5947.818495087043	1	0.1858177762157061	1	0	0	0	0	1	0	0	0	1	1	1	1	0	0	0	1	1	0	1	1	2	0	0	3.00560064829888	8008.645534290271	0.2661033205173535	40.81788134429157	30096	0	1
599602fa75e448d591854f6d7212404c	0.16259567529380733	1.1337488277091012	490.0345429783503	0	0.3785003814312634	6.84811746844402	2.663483159067209	0.4901937725389548	0.3104200484896421	0.327110469839605	0.0984502003217267	2.5650329587454817	0.1808017952991711	0.6471730392379914	1.9331285497134305	490.0345429783503	1	0.178543008080566	1	0	0	0	0	1	0	0	0	1	1	1	1	0	0	0	1	1	0	1	1	2	0	0	4.216687070096296	75.29230769230769	0.0643523997370151	25.051673606545403	1170	0	1
ce322a409375489388c5ce9baf14c7cb	0.15229591134823126	1.330508951220256	40378.04768282502	0.0010616548785603	0.8983681732257278	3983.1595782444138	70.78352613678591	0.6101264024123971	0.4590114192182157	0.3184692921014804	0.0895111913187177	70.69401494546719	0.3670252950610049	0.967885418215856	45.45444052981461	40378.04768282502	0.999860805011694	0.564547955874188	1.000074109302975	0.0009572861144501	0.0003571504375804	0.0001482113142356	0.0001178367439214	0.3589596289958596	5.891837196073401e-05	0.0004671166762517	0.0001178309521757	0.9999803605426798	0.9999764326512158	0.9999909356350832	0.9999882163256076	-0.0443988	0.0020449517812764	7.364796495091751e-06	1.000033256918734	0.9999372862546866	0.000528379276554	0.0512948781713615	0.9999686419476428	2.000066513837468	0.0004989200905738	6.651201453928247e-05	3.094617893892978	10474.066632638856	0.2430065108959875	31.15360514955119	43096.00041761403	0.0002783899766121	1.0005568187091087
ec3787b19fd648fe8776e1fbce6cc55b	0.06438543213616668	0.1755679454848495	1277.0935641642463	0	0.0367918950183745	292.5769228995463	5.895105821547985	0.1213990447846318	0.0618104338080993	0.0869931182926157	0.0374569580293323	5.857648863518653	0.0180270355666046	0.2110301462838701	13.598240951353851	1277.0935641642463	1	0.0297959945659706	1	0	0	0	0	1	0	0	0	1	1	1	1	0	0	0	1	1	0	1	1	2	0	0	2.6922315966108736	8531.175541374621	0.2974919113357262	29.56546307740147	28677	0	1
000bfa34971c41538dbc268a02df1db7	0.05461642101560717	1.355778133189506	79219.12491175949	0.0013239888520192	0.7408786398399989	10448.530309563032	173.3583788481283	0.5013490613842232	0.5191029667727727	0.1396062403740567	0.0389034394801438	173.31947540864817	0.3238286940925032	1.2586218803076543	75.7101436088246	79219.12491175949	0.9998400343930892	1.3327781562383334	1.0002497193756648	0.0131902713468999	0.0026393008783269	0.0006780375830786	0.0006781044777828	-5.23673e-05	0.0002497193756647	0.0019778622236871	0.0006780375830786	0.9999202279209152	0.9999090192319948	0.9999895123980328	0.9999735542983198	-5.58048e-06	0.00010838672844	6.160967696458412e-05	1.0001248596878325	0.999744797540949	0.0021054737272444	6.380988997609081e-05	0.999872388496442	2.0002497193756645	0.0019778622236871	0.0003390355152153	3.4081413044969864	9681.605143177092	0.1936011266832725	32.49024392219465	50000.00043992961	0.0008998076385205	1.0013397856342985
118ce1c53e7641bf9a5473d263be66f8	0.05252833026650626	1.627795030196006	77965.96561015108	0.005095937951678	0.6888254574298721	4207.166978614716	258.19679199006566	0.6666177698855097	0.6657871924917522	0.2443860942467302	0.0232178015700604	258.1735741884956	0.3268960836831093	3.787152617294389	61.75283538116029	77965.96561015108	0.9992643678721044	13.898145695552603	1.0022279813599304	1.4513715457047465	0.1380841288885161	0.0138862129274665	0.0118794879234826	0.5668244015991342	0.001623477808472	0.0045344785769812	0.01187199284245	0.9997285740805586	0.9996857101526933	0.9999413935949808	0.999907204257268	-0.046179	0.0070783963242612	6.307599442508826e-05	1.0008621142001908	0.9992704168879402	0.0048994782771036	0.0545520591183062	0.9996350002998776	2.0017242284003816	0.0045344785769812	0.0064414252127372	4.499877445978296	264.5448859455482	0.0486653579737947	35.53478432015923	5432.001103752759	0.0191268414153375	1.0235467255334805
17ca013a53b44e32a263cf1e887b73d8	0.07852862494797606	1.6129060806414868	37218.22563213098	0	0.959363666550312	6.904779102186049	8.276575211182179	0.9025358152300484	0.4996470558527387	0.9539206755686556	0.0190120961223735	8.257563115059805	0.3704707878508804	1.108590655316788	1.0142661945258336	37218.22563213098	1	0.4144023432827373	1	0	0	0	0	1	0	0	0	1	1	1	1	0	0	0	1	1	0	1	1	2	0	0	2.2432473278338545	13739.618412362965	0.4536923263889501	20.59859140278703	30284	0	1
b4f60252365a4326a5d9c6472b5077a4	0.05036733384334306	2.1165362368499725	5567100.126975922	0.0234042550303482	1.1171958317011512	14214.29683252141	2148.9999999999995	1.418080842853337	1.0938716190945743	1.0512557410584953	0.0086328311872358	2148.9913671688123	0.4353120785659499	16.580667199752078	112.3629238347612	5567100.126975922	0.996350127114769	272.90757151206685	1.0392758590288749	4581.242231508274	53.57909494850987	0.7300416005688727	0.6554299714815789	0.0612483387514301	0.0195722592038036	0.0449238196357479	0.6550413989119629	0.997553486383262	0.9973629002615888	0.9999460132615278	0.9998237365531976	-0.0456673	0.0374040127218947	0.0022527947022814	1.0102585318342423	0.9922873385922196	0.0494936039980064	0.265898581919108	0.9961349785816112	2.0205170636684846	0.0454601671912069	0.3463678930126128	3.088657327746455	5217.727111111111	0.2576655363511659	30.251411392165824	20176.090074074076	0.4210766139308031	1.4420246913580248
cf3cc287ffff4c6b967d5615334bdae5	0.05487170863287166	0.2548830659091872	2592.264378650302	0	0.0555791202222233	223.64283143890543	13.891490825835264	0.1751404448899486	0.1525855460606062	0.0850759145754172	0.0322645564176063	13.859226269417656	0.0294614838060928	0.5088122256979529	12.526070239923406	2592.264378650302	1	0.2282157055834554	1	0	0	0	0	1	0	0	0	1	1	1	1	0	0	0	1	1	0	1	1	2	0	0	3.17540733484492	2034.6826126036156	0.2032040959356452	31.355708506735112	10013	0	1
7356c3db8aab452eb2ecec405d84bd5a	0.045599099935843886	1.7085029607916011	1453748.3088345611	0.0272360558194879	1.10422769119427	12509.486650215127	896.4752098825303	1.1058226656677266	0.8829289932316862	0.8676464956200556	0.0200274137026457	896.4551824688276	0.4452319529385636	6.259084825182895	94.57272144510016	1453748.3088345611	0.9955335892265282	37.9532990809303	1.013748423715101	96.83902357775074	2.9748404967000286	0.117615376741787	0.1097919091032128	0.0347067833878075	0.0111221885683681	0.0499456601384896	0.1096676911292086	0.9973200001935086	0.997097500922733	0.9999432544289236	0.999743875646678	-0.0462699	0.0460356462689582	0.0029749056852909	1.0058789883922954	0.9909134413563618	0.0562068954717106	0.1740728881143302	0.9954442973177176	2.011757976784591	0.0511629555341823	0.0568518214612499	2.2211658471208184	17433.462811253637	0.4698033526801131	22.200683532821746	36942.260429018	0.0520879194988111	1.063113075347634
c98765ba7b064836ad448ce38d749a1b	0.05126432726019076	1.6068928890802792	16962.96401561954	0.0125725244290655	0.6949134846750279	936.817809506056	86.98213460982775	0.6619607467099756	0.660732618221873	0.245980063531656	0.027446619303112	86.95468799052465	0.3184226690180464	2.3343249398981216	27.286252416898243	16962.96401561954	0.9980738370711346	5.010880894845539	1.0030577333170072	0.0615389437166771	0.0188314260720495	0.0066676374397807	0.0056800744462651	0.2242358320331773	0.0026419329012067	0.0169093280680245	0.0056702558586154	0.9991023547994422	0.9989828477039024	0.9997405930664413	0.9995633950132644	-0.0770041	0.010390333995346	0.0007677848605161	1.0014041265337634	0.9970935287402536	0.0183643328932248	0.0776305041488274	0.9985449951747992	2.002808253067527	0.0169093280680245	0.0030869279715114	4.36106874592478	171.73755220044973	0.0551678612915032	26.63597986908985	3107.0038548024413	0.0044935546394718	1.0083520719563122
d1b231fc73ec404c873f76acc0cde7b1	0.060380112186002415	1.513630980409753	1836864.350569792	0.0121373678723615	0.7214964148907345	28085.503971224312	1071.2616991032671	0.7069091267254857	0.7777506932334808	0.1717572055021068	0.0251000782197993	1071.2365990250476	0.3298966083994056	5.294582429006643	149.29291516504497	1836864.350569792	0.998169878825216	27.532882584098097	1.0073439896315035	136.91406510781113	3.329854551491888	0.0953106568276368	0.0894869362100674	0.0317171773439883	0.0056826592028098	0.0243766099316359	0.0894544086421365	0.9988123042776202	0.9987225763200396	0.9999696902729938	0.999896150295825	-0.0281213	0.0225374644318856	0.0013874444480744	1.0029397006093703	0.995947123043642	0.0269106865944188	0.0908777531221923	0.9979710589673096	2.0058794012187406	0.0247348096995361	0.046199398259426	3.095516801601586	16701.369532704575	0.2548815665950092	30.173542452093344	65406.07947990111	0.0386805926818355	1.043723102280011
f86e272089a2417ba00d119c020ef7ca	0.049026941957451435	0.2405523924648681	1233.09457129387	0	0.0562023708531321	97.73986375693616	6.412946548573598	0.1460558676255521	0.1168165009612855	0.0761150860351831	0.0250232448376278	6.38792330373597	0.0297625436565715	0.3270269464476143	8.332825094350682	1233.09457129387	1	0.085614307234998	1	0	0	0	0	1	0	0	0	1	1	1	1	0	0	0	1	1	0	1	1	2	0	0	3.1815685889747174	2310.766001734605	0.2004133566118478	32.694858692847724	11530	0	1
17a5f76475174e02967f82e75676b292	0.08666832701272277	1.7384657116133873	776.2757933589335	0	0.7073717414736005	13.249873937295854	6.8252143291394525	0.6937066301684798	0.6552354845430011	0.2822392797444958	0.0458560813468849	6.779358247792567	0.3455321836988792	1.1956611194780709	2.8833194182225137	776.2757933589335	1	0.9483766238918452	1	0	0	0	0	1	0	0	0	1	1	1	1	0	0	0	1	1	0	1	1	2	0	0	4.303191447202639	31.968692449355437	0.0588742034058111	28.430233780680958	543	0	1
2d733048b58845a19e49ffe35c0950d5	0.09079424888931528	1.3520750975059308	11689.96634501187	0	0.9132786411793516	21.77965411747589	10.952561961903347	0.6513164925450016	0.479085256828395	0.46390933577341	0.0330341410706301	10.919527820832718	0.3754094845339966	0.8792580916211289	2.2493751820786385	11689.96634501187	1	0.3488816182201062	1	0	0	0	0	1	0	0	0	1	1	1	1	0	0	0	1	1	0	1	1	2	0	0	3.020221466355749	4137.851266450632	0.2736493133027334	34.07421225324061	15121	0	1
83345cbe07c4416db3951d533509f4db	0.0716311516791256	1.9600705906030709	14325.273780565552	0	0.9404890390374324	39.69967691350402	17.909067531509738	1.125435302686708	0.6416571966148442	1.0475063632135715	0.0076185083158008	17.901449023193937	0.3883392098096331	1.550995659767912	4.16994572657974	14325.273780565552	1	1.1389829160853786	1	0	0	0	0	1	0	0	0	1	1	1	1	0	0	0	1	1	0	1	1	2	0	0	3.4171979858394463	1129.7768261964736	0.1897190304276194	31.723219584893982	5955	0	1
e749e50b0866450da28e5b352ce8d2f4	0.0730176647942661	0.4745454484762654	10527.62498940436	0	0.104512019557522	61.67750248086691	9.827272171219567	0.2424560407259219	0.2074620870230683	0.1143852782127875	0.0341820742015562	9.793090097018013	0.059631563862268	0.4900717308217739	6.19988487575428	10527.62498940436	1	0.1813853696661593	1	0	0	0	0	1	0	0	0	1	1	1	1	0	0	0	1	1	0	1	1	2	0	0	2.888952065149468	12349.768125199616	0.2817394744992384	31.25253592661987	43834	0	1
571f95a2dd694a1dba083e18a9b5d5de	0.1127419481715723	1.5636917882126335	9563165.790191744	0.0018713579629003	0.885765551897993	107539.23529494648	3051.000000000001	0.9567536033991036	0.5015905635666049	1	0.0284212483817873	3050.9715787516197	0.347085140017401	9.272476271548092	325.476108607206	9563165.790191744	0.9997662643388584	85.06343874880523	1.0038523377994304	4166.428432348877	33.99030385385884	0.2794919017313061	0.2746342434978116	0.0082057183138663	0.0026088581084595	0.0026910368818761	0.2746272251086276	0.9998919456104024	0.999887131879211	0.9999907364961405	0.9999879883460168	-0.0486318	0.008060361688988	0.0001176822109958	1.0013180657659786	0.9996504077020382	0.0028952350238595	0.1182129266512655	0.9998251850062152	2.0026361315319567	0.0027177791846072	0.1385315363072794	2.183851539283246	51155.48655452363	0.4599196827615923	20.639778477094403	111201.0022836182	0.135163252352384	1.1378262472241452
824d96fc1c5849a9bc1db5bfc6004bbf	0.08397967423654698	1.3007881204319724	9688.011289961722	0.0012903264576366	0.4744048606430999	447.7208304376525	33.470145718787464	0.5047917345335661	0.4382668979164827	0.2385471525531129	0.036200384812512	33.433945333974954	0.2379824366933706	0.914667058633184	13.395542080884637	9688.011289961722	0.9998273033429684	0.5818011328952744	1.000206910028257	0.0002067356989997	0.0002067792579191	0.0002068664319045	0.0002069100282569	-0.000103466	0.0002069100282569	0.0028281126711304	0.0002068664319045	0.9998965449858712	0.9998965449858712	0.9999586179943486	0.9999310299905808	-1.01781e-05	0.0001757424525519	0.0002069100282569	1.0001034550141286	0.9995862453380148	0.0030350226993871	0.0001034659143865	0.9997930899717432	2.000206910028257	0.0028281126711304	0.0001034441150403	4.456135292953655	619.0699481865284	0.0534602718641216	38.89574661213873	11578.000172711572	8.634832851590348e-05	1.000259067357513
be902c9d849e4870a0b9c6d4468ca02a	0.080519512296292	0.3962715573130259	1942.553297120225	0	0.0998245859265593	65.031936324182	7.69560771546235	0.2244678175085681	0.1663196124972876	0.123286568900409	0.0457464109844481	7.649861304477901	0.0523596495955042	0.4202329761973194	6.517754375130957	1942.553297120225	1	0.1262099531865969	1	0	0	0	0	1	0	0	0	1	1	1	1	0	0	0	1	1	0	1	1	2	0	0	3.92587708599706	1097.2183636363636	0.0997471239669421	43.75085077685951	11000	0	1
ef7b3ec91c3d407da43aeafa7548ddb8	0.08331975587092527	1.3818919002975034	15975.852430857354	0.0013933147122317	0.5767538610919825	543.8498392553033	38.3747019500246	0.502994864887543	0.465561881957607	0.1979190409638471	0.0387620639094537	38.33593988611515	0.2839234929029862	0.8666183047594268	12.433421381713629	15975.852430857354	0.9998119770628636	0.4980234520408653	1.0001816830723242	0.0001815440400774	0.0001815787808869	0.0001816483039103	0.0001816830723242	-9.08502e-05	0.0001816830723242	0.0025120749430323	0.0001816483039103	0.9999091584638378	0.9999091584638378	0.9999636633855352	0.999939438975892	-8.84418e-06	0.0001543147739419	0.0001816830723242	1.0000908415361622	0.9996366860079722	0.0026937580153562	9.085022912820648e-05	0.9998183169276758	2.000181683072324	0.0025120749430323	9.083284405865476e-05	3.836737805882243	2448.7689921022943	0.1151170079025147	42.65024104947173	21268.000376081232	9.40114685682224e-05	1.00028206092516
3b572e4af8e44371955e7a5eb83d2624	0.11258848175942981	1.5472760797584857	116383.03416257843	0	0.5691750234282664	9.603720303455551	9.875600624886657	0.9885620530098422	0.4110543042352612	1.05364603697746	0.0186721770965056	9.856928447790152	0.2778804516072751	1.136748526605294	0.8016927584001947	116383.03416257843	1	0.3149422800882732	1	0	0	0	0	1	0	0	0	1	1	1	1	0	0	0	1	1	0	1	1	2	0	0	1.9756731686633724	47695.72102680257	0.5295641088402123	18.68363821285225	90066	0	1
7375543a4e6e4f1797aa7d6a2985d46b	0.044995304861458515	0.4000979360201639	9276.083725777193	0	0.0845422719331228	63.8124	9.658610520652228	0.1945736191557011	0.1933690547182475	0.0727367030829852	0.0196169017983962	9.63899361885383	0.0510131018383535	0.4506094221888903	6.389098239287098	9276.083725777193	1	0.1651899580940578	1	0	0	0	0	1	0	0	0	1	1	1	1	0	0	0	1	1	0	1	1	2	0	0	3.537684384182817	7513.816259521934	0.1644736944996483	42.283771296246655	45684	0	1
f56f0449d8af4560af443608558667c9	0.025910738499050345	1.2905144192371607	829.4389560810248	0	0.3977174814479244	26.794834287913293	8.771961265876147	0.4187685211204148	0.4656359224907702	0.1135519995514185	0.0134114167337467	8.7585498491424	0.2218444874890241	0.8331213456855134	3.735464261423441	829.4389560810248	1	0.5187241023554614	1	0	0	0	0	1	0	0	0	1	1	1	1	0	0	0	1	1	0	1	1	2	0	0	4.349132101025641	69.26108786610878	0.057959069344024	38.96156859998949	1195	0	1
f8741a9c570c43c4bd1024b8dce5d9a4	0.050032085738444566	1.0624028224313624	1555.103272714438	0	0.3022287123487386	17.475288617323756	5.900194809425071	0.3656983703610335	0.3773649129938313	0.1153691746936436	0.0216290885382357	5.878565720886835	0.1762609774479764	0.6865757498596741	3.2517232856093288	1555.103272714438	1	0.3376509622106581	1	0	0	0	0	1	0	0	0	1	1	1	1	0	0	0	1	1	0	1	1	2	0	0	4.118997219593947	270.2737193088815	0.0819259531096942	35.819366023543566	3299	0	1
7fc2952ed13848d590fc481540e83509	0.10608476127369074	1.5797669304283222	80025.23958007697	0	0.7251550656726627	7.052472003765601	8.078334887186571	0.96188875542955	0.4403499494434229	1.023127247854415	0.0257048246934072	8.052630062493163	0.3054254640729927	1.1314044960980936	0.8760409871605555	80025.23958007697	1	0.3548461559691723	1	0	0	0	0	1	0	0	0	1	1	1	1	0	0	0	1	1	0	1	1	2	0	0	2.2283228187233237	28943.765755966477	0.4629817287728977	21.103056846828487	62516	0	1
9a074661db134a1aadec37c0f249a4ee	0.05047725588560941	1.2170245960926644	176854.38853512373	0.0069221728182334	0.3281005265436186	3566.7310620562994	411.32619720605743	0.5832128106132809	0.6689477580130196	0.1636806784332402	0.0223560243805706	411.3038411816769	0.1842688467497107	6.769717270235365	58.77011591904996	176854.38853512373	0.9989638649409032	45.48893473645955	1.0029118557682868	8.107076282716234	0.4834647647035636	0.0291402410435464	0.0249502082441633	0.7111700753108064	0.0017294344321506	0.0021196667606265	0.0249378714101548	0.9998593467228368	0.9998448299819072	0.999952352460462	0.9999438213731108	-0.0769303	0.0083919146915197	1.6527216232943937e-05	1.0009304072903051	0.9996631764175472	0.0022881458432448	0.0769909144467142	0.9998315209173816	2.0018608145806103	0.0021196667606265	0.0135226123219274	4.521015557160154	181.3871469292563	0.0470036659573092	34.026018607051725	3855.001554806945	0.0673532107864681	1.0767038092770147
c9ce59f966284bcb9eb2a1284f7ec8da	0.15163651653254087	1.6209285648809786	24662.448252320224	0	0.7050996951597287	6.099501530136323	5.337611126601803	0.988321870489104	0.4430789149216237	1.026055510885708	0.0252677986872345	5.312343327914568	0.2969753004253914	1.1604184681173018	0.9711225056777352	24662.448252320224	1	0.369790901460624	1	0	0	0	0	1	0	0	0	1	1	1	1	0	0	0	1	1	0	1	1	2	0	0	2.3087279492955908	7903.254217854218	0.4315181118129521	21.036137810060826	18315	0	1
de3dc890d3c74c60b68a5fa03934cc52	0.06041368815448081	0.5727495528559522	21813.792408501	0	0.0956590898193355	58.04081812577343	14.806676989515235	0.2603845046795782	0.2650334104148601	0.0959866380361739	0.028900416875123	14.777776572640112	0.0639501759162461	0.5869651037207239	5.792810155919102	21813.792408501	1	0.2767279427086509	1	0	0	0	0	1	0	0	0	1	1	1	1	0	0	0	1	1	0	1	1	2	0	0	2.9651979307907923	16938.438268972597	0.2675264671716433	29.11318209452631	63315	0	1
7b6c59315d9d42b68b19c7ceb099a1fb	0.06112271700634345	1.388319456823332	3059.0519421282115	0	0.4445502596673426	18.473810268352743	7.436717979000092	0.4969451479139781	0.5057110587562483	0.1681028978264601	0.0323638877338179	7.404354091266274	0.2452423242334555	0.9269758645222652	3.366707333581177	3059.0519421282115	1	0.6123297733715554	1	0	0	0	0	1	0	0	0	1	1	1	1	0	0	0	1	1	0	1	1	2	0	0	4.457925162144594	182.09213483146067	0.0511494760762529	42.8131725792198	3560	0	1
9ba35ca2c11c4365a1f2b1272959572b	0.040944864889133986	1.6498063074849003	2925.844285737347	0	0.8375724176574069	9.716272925492396	7.359236036171104	0.5956337941929534	0.5803989723603882	0.2212086039454672	0.0180379701373303	7.341198066033773	0.377614374521225	0.9748117606675358	2.163447165212842	2925.844285737347	1	0.5954783519510476	1	0	0	0	0	1	0	0	0	1	1	1	1	0	0	0	1	1	0	1	1	2	0	0	3.4285614452162463	606.5654433257552	0.1970007935452273	36.239982717738926	3079	0	1
b5cfbd8da23a4f749d4f9bcec04d55fb	0.08041331941120261	0.1992344757842263	2028.9230820363816	0	0.0463848338931009	167.16708663487296	5.006105025806605	0.1382016522384239	0.0589394080405502	0.1052664151533446	0.0687376811505388	4.9373673446560655	0.0216559412367338	0.2020764826572913	10.337826897885828	2028.9230820363816	1	0.0217352081617122	1	0	0	0	0	1	0	0	0	1	1	1	1	0	0	0	1	1	0	1	1	2	0	0	3.3703986891584554	9489.519140200458	0.190989798740097	28.564178665737774	49686	0	1
bcb192b831d3461dbf919052f58f4139	0.07635045812991353	1.419816631250721	8808.923090167857	0	0.9753366535894512	4.823085197754153	4.70726199334466	0.6479380818055642	0.5126060902168862	0.4093108672193988	0.0323293577266309	4.6749326356180285	0.4086030246750964	0.8840176153596339	1.13269091086124	8808.923090167857	1	0.3616633864122594	1	0	0	0	0	1	0	0	0	1	1	1	1	0	0	0	1	1	0	1	1	2	0	0	3.316227255541195	2306.304116394606	0.2046046944991666	34.66727389598752	11272	0	1
760236043b2c4513bfc5125570135925	0.11724372520784718	1.525320607153356	646804.3902939506	0.0041658195236965	0.7132974760161968	28845.8953165772	507.320036843805	0.9805494412053484	0.4507597928939663	1.033010421463109	0.0160650392781774	507.3039718045268	0.3025629620833626	2.463650994732033	149.53679495557114	646804.3902939506	0.999455833391593	5.108099017196017	1.000710684150142	1.221641414788422	0.0643658121620665	0.0040699069016184	0.0032053255958283	0.0828135830044403	0.00042517853542	0.0027135970148234	0.0032050914080564	0.9998951700146148	0.9998864735104556	0.9999951781774684	0.999984193829667	-0.128355	0.0148899001266342	0.0001165548350865	1.0002472277318175	0.9996350010631592	0.0030533700377186	0.2088246785310267	0.999817478248506	2.0004944554636355	0.0028540725151402	0.0018188081243616	1.683835533636716	63412.58113827241	0.5950601148432639	16.009193111290376	106507.01088537512	0.0068121220559342	1.0083892460000938
bfe41e51b07248be951d3c001dfdfd68	0.05576266307020132	1.05916150202469	12493.345542992398	0	0.3224105935517821	27.607266212559967	10.157999843705232	0.381811976777071	0.3767356436009053	0.1363465615502558	0.020071105610541	10.137928738094692	0.1774280734581393	0.7099780373475879	3.8513942893052833	12493.345542992398	1	0.3582884279055184	1	0	0	0	0	1	0	0	0	1	1	1	1	0	0	0	1	1	0	1	1	2	0	0	3.0124050051731373	5707.1248335686905	0.2302652747052124	32.908423619240054	24785	0	1
fffa236a1c7c4f87a682c84c40ef8b9c	0.11146845752562223	0.5328444727427595	16113.81442219906	0	0.1484655683000037	39.27534785991193	8.443463802495707	0.275470081100705	0.1702701768638898	0.1760434220127841	0.0603726991451754	8.383091103350532	0.0736048672356636	0.4043194163070174	4.644170812060436	16113.81442219906	1	0.0875904248212183	1	0	0	0	0	1	0	0	0	1	1	1	1	0	0	0	1	1	0	1	1	2	0	0	3.2507708667270125	20231.516541376262	0.2052481616436504	34.7764773343608	98571	0	1
13cd243cf1ec46eb8d1d1764c25f656c	0.033858495655183694	0.4037704565334474	95732.87084293646	0.000655083987738	0.0939647570591481	52001.758270367085	275.5427713933194	0.1921328084139684	0.206287460828736	0.0598334568124086	0.0147862564194113	275.528	0.0555055072428319	1.10803339469386	207.03880875479	95732.87084293646	0.9999230545629336	1.190822987687761	1.000408153606778	0.4446451715340662	0.0401381546987761	0.0036738920100917	0.0035734046076945	0.0143640310526707	0.0003762969062475	0.0013380744259736	0.0035732624199786	0.999945807875948	0.9999435814592468	0.9999862747165374	0.9999817765918256	-0.0609646	0.004599298709419	5.465244451720015e-05	1.000191497495558	0.9998299404088388	0.0014423233524038	0.0928875793116307	0.999914965582946	2.000382994991116	0.0013584570204617	0.0018118241544465	2.569347902576235	28849.864789996795	0.3699886475151881	26.03057127594825	77969.00017954473	0.0015774008674404	1.001910868868227
966f987b04834a59b809ab41b4dec9d2	0.0375049486351829	2.2206655231425265	33160.113521706124	0.0044760942899486	1.1813832009189835	197.7824468413568	57.81355754678956	0.9204442434448808	0.9264764429145734	0.3042542612279559	0.0173560544040392	57.79620149238552	0.5349862036464228	1.8820176236105384	8.813412906471957	33160.113521706124	0.9993592710325748	2.694772730289839	1.001172536889913	0.0063607282053661	0.0031963405432512	0.0017804611350814	0.0015982398994893	0.063747263657691	0.0010717301122676	0.0101768371346708	0.0015970493360483	0.9995518865750698	0.9995167859225884	0.9998644764617688	0.9997583929612942	-0.05749	0.0120056127014571	0.0006110340484487	1.0005633305256163	0.9983658096696604	0.0111763036737158	0.0931877029505218	0.999182469681058	2.001126661051233	0.0103428826724531	0.0008446752586426	3.547777280062869	1488.9248023926511	0.1590391799180358	36.0727274270653	9356.001495406965	0.0006407061486294	1.0014954069643238
aa086b1bc9494993abd9febea720e091	0.14745256201558765	1.3049485593243475	27856.433643912067	0	0.7323625512865627	6.5136788271632895	9.098352988915702	0.6036859743618224	0.4026485817883687	0.4080200031671742	0.0736520358533214	9.02470095306238	0.2990642253077678	0.7775615884197927	1.3460106526043816	27856.433643912067	1	0.2401652681447283	1	0	0	0	0	1	0	0	0	1	1	1	1	0	0	0	1	1	0	1	1	2	0	0	4.144887164792456	3382.719494725876	0.0734192710579909	33.88891341859939	46074	0	1
3fe92ff98b144a6d9279fe52f97e6622	0.056156563474950356	0.8113919284594449	1697.252600448367	0	0.1339900575320883	36.02393513495503	8.445073681811214	0.3136496417406879	0.3491336291205453	0.0885784469023138	0.034283415365964	8.41079026644525	0.1013076986907846	0.7201123160793262	4.908720910868439	1697.252600448367	1	0.4201856500050696	1	0	0	0	0	1	0	0	0	1	1	1	1	0	0	0	1	1	0	1	1	2	0	0	3.7455559204348248	405.41063244729605	0.1238651489298185	36.97922255332985	3273	0	1
9c99c84cc01640af84acea2e09cb2d58	0.07139223528574733	0.6465993958988396	4389.903929860793	0	0.097215572024619	329.0051781049498	24.49398200396221	0.298785066340451	0.3130219714120841	0.1010835843814903	0.0455283364434076	24.4484536675188	0.0741625397410756	0.7534483791793818	12.339417867463752	4389.903929860793	1	0.4784119442199696	1	0	0	0	0	1	0	0	0	1	1	1	1	0	0	0	1	1	0	1	1	2	0	0	3.581291845731504	1286.851286693392	0.1664103564843388	39.54588751046856	7733	0	1
685740741cf049eb9642f8cf5ba3ace4	0.08137584255287682	1.567628185527054	32326.67470520879	0.0013148000125828	1.0131811046687529	1483.9671671340618	59.93438316052424	0.8314678314650585	0.5209755853428942	0.8632253447387158	0.0345213231248922	59.89986183739934	0.3991716968578211	1.1519482269572494	22.49734278174774	32326.67470520879	0.9998358132381804	0.6356459628287436	1.0000856478211024	0.0006849737997732	0.000302611300337	0.0001453955139796	0.0001152074695931	0.2922858308158412	7.054932227072582e-05	0.0007609064383512	0.0001151999980865	0.9999721683634184	0.999969191153597	0.9999905403983018	0.9999845955767984	-0.076925	0.0031559618118786	3.147344336360789e-05	1.0000390492858433	0.999903563944655	0.0008091266869604	0.0769452863203685	0.9999517797513904	2.0000780985716866	0.0007609064383512	6.515074589320932e-05	3.120198426203091	6257.778539468824	0.2568769155399542	31.36828523464245	24357.00024629531	0.0002052309247172	1.0004515413981363
75db44b9489047a199b3016d70df6046	0.0603302027715561	1.9601020003001208	14526.05497493384	0	0.910286303991776	24.930662826664594	15.664047162732905	0.7243064555531756	0.7121234846134468	0.2662362266493768	0.0300906535156441	15.63395650921726	0.411775595734243	1.273552343297328	3.4479903720539915	14526.05497493384	1	1.0973157295621103	1	0	0	0	0	1	0	0	0	1	1	1	1	0	0	0	1	1	0	1	1	2	0	0	4.211026213253056	618.6625725770433	0.0690780005110588	36.56176496637524	8956	0	1
ca38a1d6f9e8485b94cb6202e5b1996d	0.06321525957513321	0.2510778266713317	5766.825489971775	0	0.0678558794828155	492.7123275430193	13.846125951599207	0.1545382416433888	0.1002562484978022	0.0955866707883645	0.0332058479985744	13.812920103600634	0.0328558289502817	0.3229748279512192	16.718731771546555	5766.825489971775	1	0.0804306713598892	1	0	0	0	0	1	0	0	0	1	1	1	1	0	0	0	1	1	0	1	1	2	0	0	3.281757342825249	11763.167969032633	0.2127770777988682	35.34552876967501	55284	0	1
1d298f0ac94d4cd6b8b8a0dcb2229419	0.07557253530171751	1.4025272958708146	35796.68607961092	0	0.9713167098910098	5.4946965416717966	7.9314536365673955	0.7248765563328639	0.4780270392882481	0.756203134066468	0.0269924668517429	7.904461169715653	0.388983986162649	0.9182308384125978	0.822287150885265	35796.68607961092	1	0.3177018506909108	1	0	0	0	0	1	0	0	0	1	1	1	1	0	0	0	1	1	0	1	1	2	0	0	2.881206296269241	13040.761776898436	0.3071594539499349	29.361310856806448	42456	0	1
6845f7a92d474a1f986336d884cb41b4	0.05445089926903325	0.7503939025260964	3230.829862584796	0	0.1691454085160393	28.089003155403503	6.3507520074999	0.296097682097891	0.3033831636833143	0.1002340553362754	0.0280292550000903	6.32272275249981	0.1014362006045992	0.6181956182324471	4.340026141287654	3230.829862584796	1	0.2944919850580537	1	0	0	0	0	1	0	0	0	1	1	1	1	0	0	0	1	1	0	1	1	2	0	0	3.927111742582933	863.735273243435	0.1021688281574917	40.28004868496366	8454	0	1
27d104fc9cbe440aa9908989f932520a	0.028021876825058977	0.7103265821276801	12628.615585134425	0.0027231548398541	0.113822249729098	379.0152439925529	35.817890576708834	0.2874373110352656	0.3629543312194222	0.0561529737181514	0.0103430642466732	35.80754751246216	0.0839326919575539	0.9132729446578683	13.96002762699782	12628.615585134425	0.9996038035020832	0.7514472636688702	1.0002785496711608	0.0002782073029981	0.0002782928231463	0.0002784640359785	0.000278549671161	-0.000139296	0.000278549671161	0.003671282027057	0.0002784640359785	0.9998607251644196	0.9998607251644196	0.9999442900657678	0.9999071501096132	-1.41867e-05	0.0002365964877903	0.000278549671161	1.0001392748355804	0.9994430291104516	0.0039498316982177	0.0001392962479723	0.9997214503288392	2.0002785496711613	0.003671282027057	0.0001392534267848	2.5227855036364617	5508.821808334985	0.3638347406601271	28.41619104700866	15135.001188825045	0.0001980982489583	1.0005944125222903
7f052033c69d4ff19d2fd335b58ea2e7	0.09024084214969787	1.2256642951120793	39666.08442258136	0.0010277861099958	0.5965135606130453	8000.145870197891	106.38501497777064	0.4596615029633297	0.4173141016870899	0.1732388285746658	0.0691576716419329	106.3158573061287	0.2809717933753176	0.8928942566790666	63.17645050010348	39666.08442258136	0.9998794091048075	0.5859714563039558	1.0001127292123675	0.0041776737898186	0.0011305099356646	0.0003312748884956	0.0003312912146925	0.0769031332918459	0.0001127292123676	0.0008169341726399	0.0003312748884956	0.9999679876507526	0.9999633607569692	0.9999909541134434	0.9999854573421646	-1.97872e-06	4.138678232807759e-05	2.053809020613352e-05	1.000056364606184	0.9999025466054524	0.0008656626717863	2.4365001618319104e-05	0.999951271500853	2.000112729212368	0.0008169341726399	0.000165641525797	3.283417066116748	10954.299941712055	0.2201736566983309	31.412694644250173	49747.00024119148	0.0004220653053035	1.0007034751673265
064c861a64344f68a313e70c57496775	0.0689280740266502	1.6383552194752689	16148.667842082328	0	1.0381220338016286	13.777467150631724	12.819296015313636	0.8490638840028357	0.537822321644569	0.8697022972435863	0.0225611421316294	12.796734873182007	0.4115875529498159	1.087881473578664	1.5113890500639862	16148.667842082328	1	0.4625766214377044	1	0	0	0	0	1	0	0	0	1	1	1	1	0	0	0	1	1	0	1	1	2	0	0	2.6412085601676125	4830.769732502748	0.3540322266399962	23.640678402151824	13645	0	1
1cd92639ef57485ea8b80b66618212ad	0.05147846826929606	1.202044512065424	6268.971544317104	0	0.2527107531703341	35.22591760320323	13.024284632162566	0.3938086641506482	0.4425532039817066	0.0999114321447197	0.0235111736021824	13.000773458560383	0.1792225627144002	0.8245350813988068	4.268414467131047	6268.971544317104	1	0.524772836497219	1	0	0	0	0	1	0	0	0	1	1	1	1	0	0	0	1	1	0	1	1	2	0	0	3.4299183755437275	1587.674764125366	0.1721803236227487	31.56173185359197	9221	0	1
7076858f57dc41a6a22947128bc4fc90	0.06378608658024243	0.5316234827245191	529.3802181887258	0	0.2715322176151943	185.4043983964617	8.78747773143315	0.2800971653397223	0.1873121302209801	0.1964170990377925	0.0229513414805491	8.7645263899526	0.112657647769326	0.4676128742459559	10.468644411150455	529.3802181887258	1	0.1402073781292163	1	0	0	0	0	1	0	0	0	1	1	1	1	0	0	0	1	1	0	1	1	2	0	0	3.0273000017246945	583.876497315159	0.2411716221871784	29.0011934332678	2421	0	1
87c3a7da73b340bba83381f0127bb5bd	0.08824635719853254	1.08591492760474	40271.47392072169	0.0024996808578781	0.31293261895524	4198.908429461157	90.02731482438871	0.3841854397537347	0.3393329438194326	0.1645047741726034	0.0662811895953236	89.96103363479338	0.1886236258620056	0.9061989021508547	50.12491918838235	40271.47392072169	0.9996737748124512	0.6735979981406441	1.0002673985611357	0.0031433967911543	0.0012028981995757	0.0005144291063815	0.0005011015646025	0.0089815358101724	0.0002606975068925	0.0025773754836905	0.0005010294788479	0.9999023073049024	0.9998936916523248	0.9999766492001292	0.9999550269632572	-0.00952734	0.0018563506731929	0.0001203394220911	1.000132024017007	0.9996597568079426	0.0027548010097763	0.0193076784505828	0.9998298593835506	2.0002640480340146	0.0025800452306812	0.000253882667746	2.285711961767175	21335.19482055465	0.4350569906312123	19.99718395975985	49024.00191680261	0.0004485534996234	1.000938009787928
899e58c3c4854885ad3e8fbbf62f027c	0.4676818473739892	1.3629019270822773	114549.4779639744	0.0036834071152344	0.2801583291800231	5194.942124371707	106.95304143716297	1.0544806302212817	0.2659773073368973	1.0949357146831016	0.0406606372113016	106.91238079995163	0.1317367012013408	1.5184072915136948	63.452508764514896	114549.4779639744	0.9995170248857412	1.1936313034100838	1.0005384881183352	0.024325659741092	0.00535430366531	0.001377322254065	0.0010307903090616	0.1423649941189352	0.0004016735672876	0.0032213017014244	0.0010306150655568	0.9998712691466236	0.9998575526368018	0.9999704734354218	0.9999454909322824	-0.135351	0.0116708268691723	0.0001286621367236	1.000225901211611	0.9995766639371624	0.0034699875559832	0.2037652654838897	0.9997883038896072	2.000451802423222	0.0032515617122325	0.0006020281407816	1.9377178806982704	26067.929635295062	0.5246745357719802	16.46820845186227	49660.00386442315	0.0012879077113464	1.002254246840029
9fa4d86d37064f3bae4326750764cbed	0.052052417748493694	1.2876074868609406	16477.73256481951	0.0027419728421593	0.2083106669769852	573.8118445853293	51.25260898031805	0.4317824744558363	0.5263017022304304	0.0824445957105175	0.024519330648316	51.22808964966973	0.1870647581858805	1.2336006837373292	16.822505587203914	16477.73256481951	0.9996306385407232	1.3353345416700015	1.0004464937481603	0.0029571014340713	0.001436333366802	0.00074939532373	0.0006843172139325	0.0306460367148012	0.0004138542756141	0.003955498018934	0.0006841336903343	0.9998381500185792	0.9998201191560248	0.999944051183452	0.9999100595780124	-0.0305955	0.0040370063342159	0.0001771992045855	1.0002150870059434	0.9994428577391982	0.0042504405616613	0.0385886285388086	0.999721377193545	2.0004301740118877	0.003971817755207	0.0003584281344156	3.109783383081298	2646.0476542297747	0.2443708583514753	29.5070904504173	10824.000554118951	0.0004616890304371	1.0010158847432582
a955efe0cafe4b25a4dfc93f6f8c013d	0.08643125793887843	0.3144472179268383	68871.12834420962	0.0020349486698514	0.0499851386157616	12387.210632196851	153.5130423257241	0.2062648529929227	0.1589892809340166	0.1103818132016167	0.0510838299492939	153.46195849577478	0.0306613979007439	1.0243792666244658	99.5278306082222	68871.12834420962	0.9997562345874672	1.0068076923098863	1.0006723048095576	0.0748259859304976	0.0125324468742808	0.0024143779005309	0.0020382998275155	0.0860738795650497	0.0005352460921384	0.0029658434280225	0.0020380075724523	0.9998702694154536	0.9998508209108524	0.999970953448182	0.9999491439666296	-0.0750884	0.0097583858495777	6.393593105634144e-05	1.0002891007354686	0.9996198039822222	0.0032148370128117	0.1890150826361251	0.9998098813426872	2.000578201470937	0.0030194261183298	0.0011131694320116	2.728546547408999	21174.504235738663	0.3226246988624248	27.49061381352635	65616.00118844466	0.0012188052405612	1.0018893222818137
66081fd8cade4e85acbbae9c0e43689c	0.06631985420686132	1.563389944090971	132072.24447400114	0.0027847911151707	0.8635217923691196	15595.675605259295	283.8653113766002	0.5933266550330093	0.5742538312809938	0.2047629117687413	0.021669109810499	283.8436422667897	0.3729687679516841	1.9762334250426548	109.6706308054796	132072.24447400114	0.9996451908627152	3.553462030683161	1.0008041004015222	0.575779371086396	0.0490279968192673	0.0046003037593266	0.0037783251214604	0.0892037918500436	0.0005522053901959	0.0027158518622364	0.0037779870107414	0.9998868299586836	0.9998768870245788	0.999983814240164	0.9999690011669984	-0.105145	0.0106999297785828	0.0001028013813563	1.000299253872237	0.9996446529712296	0.0029016665321094	0.1983209954714446	0.99982230635421	2.000598507744474	0.0027239728863204	0.0020946572201967	3.684391887729511	4545.177070704084	0.1344050942042192	41.818620494508586	33805.00141940444	0.0042578635487965	1.0054410503592868
792b614656754d21a0f0da9262158b99	0.1456203508172849	1.472779128216863	61627.214089011024	0	0.4747353907308128	7.941712210921269	9.993140148977297	0.988200989940976	0.3727598275837744	1.081155601254102	0.0462728418437285	9.946867307133566	0.244535146205553	1.1118468617459802	0.4046998698381656	61627.214089011024	1	0.2596622474540597	1	0	0	0	0	1	0	0	0	1	1	1	1	0	0	0	1	1	0	1	1	2	0	0	2.886781789892327	15092.323637968386	0.3027425908282192	25.561814518756957	49852	0	1
9d1d6af7ecaa469aa71dc385db2fe34d	0.060226261682078785	1.2632028750691615	102095.4445451452	0.0009038707924826	0.3670151370151003	652.6422143991233	69.8672567845358	0.4436777552781538	0.4569626180614685	0.1400739901990582	0.0232425086927063	69.8440142758431	0.2079788161616595	0.9031971323735531	12.119835426469404	102095.4445451452	0.9998881424109602	0.6189151093991487	1.0000654945589564	0.0001126984543741	8.528705842290998e-05	7.158731241127924e-05	6.856000113305018e-05	0.0307398610382344	6.322067924012544e-05	0.0009446513582333	6.855559228620096e-05	0.999969279547362	0.9999689235925692	0.999993390430128	0.9999844617962844	-0.0242828	0.0012909657797747	5.854877258381631e-05	1.0000323682995254	0.999877387826161	0.0010189014260424	0.0307972277111107	0.9999386910218008	2.0000647365990507	0.0009583504077492	3.5036828386082354e-05	3.063528801707033	32357.23206794883	0.2585414018677046	32.211935103813786	125139.00068715891	7.989811371618636e-05	1.0002077457192398
52127c818a18426bb628b91225f6a932	0.05281534809336255	1.4959705692931726	33254.911706873805	0.0005045160608155	1.063349932877447	186.1034344634177	33.34547416492733	0.7304327394019074	0.5554560466120063	0.6754618456773749	0.0130786013487456	33.33239556357859	0.4452431836238877	1.0103977106585262	5.227050327233832	33254.911706873805	0.9999386032233886	0.4873715469138163	1.0000628225891373	6.280619861360716e-05	6.281029556203102e-05	6.281849109689872e-05	6.282258913735431e-05	-3.14123e-05	6.282258913735431e-05	0.0009655126511983	6.281849109689872e-05	0.9999685887054311	0.9999685887054311	0.9999874354821724	0.9999790591369544	-2.76932e-06	5.335745974964467e-05	6.282258913735431e-05	1.0000314112945687	0.999874360968786	0.0010283352403353	3.1412319112652844e-05	0.9999371774108629	2.000062822589137	0.0009655126511983	3.1410270058563266e-05	2.2919193061875154	14522.83925830417	0.4458414458864176	20.47516314063921	32572.000061398663	3.069838830568077e-05	1.0000920979922638
0fef74b7fc8e4a8bb56075c6170e512e	0.09326345636639297	1.1573573223235116	2223.724561213605	0	0.3712287944822268	17.672122650727037	6.668363053565088	0.4501799505256407	0.3884329408384779	0.2078379095495981	0.0584272738022051	6.609935779762883	0.1962964015903333	0.7435658975246325	3.176905026776609	2223.724561213605	1	0.3502282561063439	1	0	0	0	0	1	0	0	0	1	1	1	1	0	0	0	1	1	0	1	1	2	0	0	4.473374692989891	207.30283441074093	0.0515422263577177	42.14590463539543	4022	0	1
109f7ab6605648008695682edcd70ac9	0.08690315940279598	0.3136833409855749	1567.2605394700013	0	0.0688632397987675	174.6468639258266	10.212514174033286	0.1963636313393068	0.1294495110552426	0.118695108432009	0.0559210585382819	10.156593115495005	0.0355991536332218	0.3752857214254058	9.984662827164804	1567.2605394700013	1	0.1022806969930281	1	0	0	0	0	1	0	0	0	1	1	1	1	0	0	0	1	1	0	1	1	2	0	0	3.8121124993828337	1311.337347232207	0.117841242562204	39.61790657280732	11128	0	1
f4783c4729c74c3d82ff040896ce6767	0.09079790013681371	1.1377921320185866	9842.505730145149	0	0.2350154824173365	21.08864925727852	10.696229249218849	0.3847665934450401	0.3683575751710513	0.1407596556772099	0.0537837062987482	10.6424455429201	0.1712212861267603	0.6765553157693608	3.293882791478416	9842.505730145149	1	0.3096817638644787	1	0	0	0	0	1	0	0	0	1	1	1	1	0	0	0	1	1	0	1	1	2	0	0	3.36112218656944	4267.697019020602	0.1984698423020323	34.77734383915339	21503	0	1
f4c08fd7c5174a57bc0c08d77bf69145	0.033341841008444076	1.8346948927435711	4163226.263064082	0.0068095098541444	1.16712564569197	6019.456191619212	2025.7110129454209	1.1750375906630404	1.1490737929811687	0.5523104353358265	0.0139824452429725	2025.6970305001776	0.494406554965213	25.946588657843147	77.15705360353046	4163226.263064082	0.9990300679966998	671.8447496398436	1.0313685281718117	10405.456277012709	127.58031234438704	1.5783864320119052	1.538981240782868	0.0094439053965614	0.0211209118621135	0.0105935124644539	1.5385053705199885	0.9993950102837568	0.9993694494942872	0.9998824265121662	0.9998588145112024	-0.0889937	0.0161189197998568	0.0003305840838682	1.010697273316541	0.9984054164261666	0.0113911922072235	0.1475700140042216	0.9992023202572292	2.021394546633082	0.0105935124644539	0.7793419181986934	3.0343643898076653	1703.9262613195342	0.2755378818433917	33.09077164037227	6178.001940491591	1.071262963805941	2.1005821474773607
212f3d5f71aa4658ae7ad694a3375090	0.02757369388471334	2.519244160237038	500.30520209939306	0	0.3235984757266782	17.659137891028774	10.484669512072514	0.7248819723102983	0.948816120935911	0.1091995022043202	0.0127332270410539	10.47193628503146	0.2881560081234539	1.7519580668767265	3.5849297926703936	500.30520209939306	1	2.543903194313968	1	0	0	0	0	1	0	0	0	1	1	1	1	0	0	0	1	1	0	1	1	2	0	0	3.8095736021821	13.319018404907975	0.0817117693552636	15.742105461251835	163	0	1
5d08a70e12a74d57b2cee128fcacce48	0.07761238346919105	1.557305999098886	66325.91286830418	0.0003454762765743	0.7660724800574888	893.4499204184095	54.04936570932665	0.954018416460194	0.4508822545757469	1.0435779627553492	0.0347382482432348	54.01462746108341	0.3215174330287785	1.1598936167583815	12.520153327201498	66325.91286830418	0.9999594328715607	0.4352020632516232	1.0000209902331192	0.0001679065569064	8.395519184994895e-05	4.197950945281774e-05	4.198046623859615e-05	0.5384562908434589	2.0990233119298077e-05	0.000177005309083	4.197950945281774e-05	0.9999930032556268	0.9999916039067523	0.9999967707333663	0.999995801953376	0	8.913774248857467e-06	2.623779139912259e-06	1.0000104951165596	0.9999790101256756	0.0001875004256425	5.247618079522189e-06	0.9999895048834404	2.000020990233119	0.000177005309083	2.098999392285347e-05	2.710874005486044	17209.371115618662	0.3490744648198511	26.191422369974777	49298.00004056795	8.113425687824266e-05	1.0001622718052738
64b6bc92951b4c798cf2a747db5c0c7b	0.04515118962338225	1.1356104225388215	91443.73790273386	0.0013673115916009	0.2729000845369316	14080.699836770717	198.78859578141277	0.3593857801002499	0.3979433736731972	0.0904287493969835	0.0353556536541423	198.7532401277586	0.1795568381711559	1.3540525854134466	103.12407813582767	91443.73790273386	0.9998396070376444	1.7043002651265744	1.000228486278254	0.0606052064276799	0.0068943331939994	0.0009274864740124	0.0006775730829036	0.2989120901714082	0.0001481404698946	0.0008090107388799	0.0006775300253726	0.9999668092175876	0.999962341584236	0.999992923932749	0.9999878126030952	-0.0384634	0.0022496750221471	1.82662551003107e-05	1.0000829975469874	0.9999031086093432	0.0008610295124587	0.076944560082785	0.9999515521512364	2.0001659950939747	0.0008125816636959	0.000401264889229	3.422609210979279	10058.149754385964	0.2016671629952073	35.201324661428	49867.00040100251	0.0015838694480562	1.0021854636591478
b78510276d574884974a998256e3ccec	0.03184368781555325	1.893774838875249	14573.854632104863	0	1.2548746158635695	7.9125451077544255	9.475742442697888	0.8215231535941215	0.6803486148392623	0.6831209464956257	0.0107982751898992	9.464944167507989	0.523572085670038	1.1812825404848388	1.5311803660027492	14573.854632104863	1	0.7205281485630842	1	0	0	0	0	1	0	0	0	1	1	1	1	0	0	0	1	1	0	1	1	2	0	0	2.666633405391769	3726.748755266181	0.3568315545065283	26.244194163660477	10444	0	1
cc11408aa6f9461483d8e584a74edd02	0.046857054133242794	0.5492406788386736	359.4328163127258	0	0.1351978251711967	50.06665865117257	7.225013686546734	0.2738529543746791	0.2933014904683424	0.0886928473126103	0.032331233130287	7.192682453416447	0.0733771500005365	0.6908939263113973	6.087314984081033	359.4328163127258	1	0.4023389767942383	1	0	0	0	0	1	0	0	0	1	1	1	1	0	0	0	1	1	0	1	1	2	0	0	3.258378349947141	135.03452855245683	0.1793287231772335	20.632088732277616	753	0	1
460ec189a25246a298eb04a2c9e1c4f7	0.05681241658646684	0.2653792576248591	14891.759234963229	0	0.0665333048279313	212.3920756181284	13.282208589115234	0.1629227912960664	0.1264901746966932	0.0865451194393196	0.0270214042083501	13.255187184906884	0.0339938990355612	0.3740544719071896	11.29529882236952	14891.759234963229	1	0.1133729120300648	1	0	0	0	0	1	0	0	0	1	1	1	1	0	0	0	1	1	0	1	1	2	0	0	3.631428455683903	15180.16565350972	0.1426264941654347	41.67377900721797	106433	0	1
4cdbea36d5c3471eab87174ade2928ed	0.06474020734119874	1.55461950903211	6628.374798574339	0	0.5806648814980433	17.915705491069925	9.45736512499496	0.5557195854943692	0.5327766877675324	0.2178413891604539	0.0287198586511074	9.428645266343851	0.2927955478389147	0.9573578881009246	3.053330755760035	6628.374798574339	1	0.607709868207029	1	0	0	0	0	1	0	0	0	1	1	1	1	0	0	0	1	1	0	1	1	2	0	0	4.566124120487079	326.97151548672565	0.0452117692874344	41.45208855431122	7232	0	1
f3095900ca314f7d994d6c58d4788964	0.06684079711909294	1.563671365589533	252068.20121324924	0.0034302535009807	1.0854549497447945	16550.57575336726	308.9248106793468	0.7604384298371395	0.5948303077406848	0.598217016713078	0.0278981527977585	308.896912526549	0.4545279381936602	1.853492755494808	104.6136192698084	252068.20121324924	0.9995639343093944	2.8571687890985618	1.0007279170134409	0.4359479329276127	0.0343821291397414	0.003273662530074	0.0024519415177598	0.1610114531151901	0.0004644495590957	0.0030465686310279	0.0024516996934486	0.9998792440561888	0.9998713226916028	0.9999900371191962	0.9999732869375252	-0.113328	0.0124896702556998	0.0001459358260703	1.0002612061672715	0.9995831181103744	0.0033485550984893	0.3137050189635679	0.9997915307213304	2.000522412334543	0.003135712100726	0.0014314010119584	3.2609143405456127	16865.324124678016	0.2298573606732451	37.86589705234238	73341.00455208319	0.0032024695732019	1.0043749063006828
05110d4711e44d9c8813b46fe1b8c2c8	0.05167562198674216	1.5100648624113997	22483.73034494855	0	1.039015633313055	4.47321864634899	6.219318425225753	0.6922840772685328	0.5369288179901663	0.5316647763543033	0.0129343055266343	6.206384119699118	0.4281227772120604	0.937747262865009	1.0044254165613624	22483.73034494855	1	0.4001126853712724	1	0	0	0	0	1	0	0	0	1	1	1	1	0	0	0	1	1	0	1	1	2	0	0	3.650123551693708	3769.06046620776	0.147413190949928	40.678220565913904	25568	0	1
10fc4e8cbf5c4a579e9ec1034e286ae9	0.037679870340246106	1.659298338395726	1484.665892703771	0	0.8895615075159173	5.92852110000671	4.705607942221451	0.6284199466356133	0.5507936363728905	0.3513204658498254	0.0144123392834154	4.691195602938035	0.381368006840683	0.9428793627166672	1.6105992816916828	1484.665892703771	1	0.4941098633074814	1	0	0	0	0	1	0	0	0	1	1	1	1	0	0	0	1	1	0	1	1	2	0	0	4.2303917569209055	103.00718562874252	0.0616809494782889	32.3525705475277	1670	0	1
83701eedb5ab445fb45e6f4ca27084da	0.08107094464760134	0.4226000428957795	5686.516904204672	0	0.0881809576254302	22.65114760927193	3.568398100330044	0.2069435464211692	0.1513884982527173	0.1123146780364308	0.0662811895953236	3.50211691073472	0.0512167544883236	0.3374789842584755	3.960123616022389	5686.516904204672	1	0.0710664334107617	1	0	0	0	0	1	0	0	0	1	1	1	1	0	0	0	1	1	0	1	1	2	0	0	4.19030218277281	3716.2915540066897	0.0744315238439922	38.86972621914643	49929	0	1
e5cda343f233430ba3ab9f6d67386d23	0.06393107149444338	1.52094120845936	39663.66424082639	0	1.0655428169063532	9.082168760235804	10.79667613333795	0.7300705218776534	0.5609105073877647	0.6554927881748782	0.023741292914935	10.772934840423016	0.4491605830047184	0.996909082307424	1.4541677191310298	39663.66424082639	1	0.4608247514723211	1	0	0	0	0	1	0	0	0	1	1	1	1	0	0	0	1	1	0	1	1	2	0	0	2.571692883771041	15277.931295414684	0.3828096039943544	27.0712252806851	39910	0	1
ebd55cec418343d3b5a2e7755e09bd49	0.045847233126852016	0.6408034113712787	519.7486454329728	0	0.1545562005256068	80.52543492191292	10.164904487681696	0.2759420196213829	0.2951699928787065	0.083491049232958	0.0313423428527461	10.13356214482895	0.0900481392878016	0.6911657920154648	7.284217124907262	519.7486454329728	1	0.4015661538596369	1	0	0	0	0	1	0	0	0	1	1	1	1	0	0	0	1	1	0	1	1	2	0	0	3.9892899073191286	93.58272058823528	0.0860135299524221	33.641111591695505	1088	0	1
1a7bafdfe8934d899fc8e2e862e43527	0.07147302097131641	2.047338576612509	12360460.189820368	0.1396056590551968	1.082981168841283	2122.522504453386	2358.800861342824	3.0472434907491497	4.471039338467488	0.5072110822424231	0.0328945939430798	2358.767966748881	0.4652597963263799	37.31716762166955	40.39705152075469	12360460.189820368	0.974508886240163	1383.285306411869	1.366371694137187	27533.33995174388	347.93605973324105	5.6788210779580215	5.045430656280673	0.0587066801081466	0.1828066706148315	0.3014895342450343	5.011261476481287	0.9781281626529316	0.9758353755892986	0.9996002119309372	0.9984357094039796	-0.0789517	0.1568113587419096	0.013365331184878	1.0990244084344327	0.9374177769898254	0.3475949229776655	0.3420866500736481	0.9681505649047616	2.198048816868865	0.3081668948398423	2.681062933559674	4.172936461140676	738.8312302839116	0.0832392102618197	43.485386714070245	8649.740874267689	2.129982751691169	3.2861649391617846
910f564df01a4d1991d138856086679d	0.06485385492298415	0.8624744980180834	16460.482549045384	0.0004828935470945	0.2263416989695629	3109.453727183971	62.42018005426563	0.3213587815484032	0.3041888453208862	0.1238478331162717	0.0322333459475579	62.38794670831807	0.1305978666873576	0.6940019102026002	34.24358555030837	16460.482549045384	0.9999414811130792	0.3783671848865835	1.000142108471589	0.0011365430676113	0.0005683121146628	0.0002841966469248	0.0002842169431777	-3.55284e-05	0.0001421084715888	0.0010814218374329	0.0002841966469248	0.9999526305094706	0.9999431566113646	0.999978137158217	0.9999715783056824	-3.16027e-06	6.034898404294125e-05	1.7763558948608924e-05	1.0000710542357942	0.999857899139506	0.001152476073227	3.5528386458317376e-05	0.9999289457642055	2.000142108471589	0.0010814218374329	0.0001421033975256	3.0496761603354248	9087.04207631086	0.2658895738620921	32.8289281650877	34174.0000585206	0.0001170377738413	1.0002340823970035
fd905d2187984f21ac35c3394370d6bb	0.05857437078286323	1.0689974724991167	126.75321574412952	0	0.5479414948097525	9.485118668321288	3.554869876250032	0.4330040383522233	0.4034866233056783	0.1631993676044019	0.0289050654113208	3.525964810838711	0.2424748452575637	0.6995674773620766	2.3007123338323416	126.75321574412952	1	0.3019021581534057	1	0	0	0	0	1	0	0	0	1	1	1	1	0	0	0	1	1	0	1	1	2	0	0	4.391696656647281	13.903474903474905	0.0536813702836868	36.34743071808709	259	0	1
3cb29ce80be04f579b87d9c82c149194	0.0067021078153545605	2.319048628711185	2308.8261078670707	0	1.3070731647981753	39.718617747392095	16.44710443145153	0.8581845992488037	0.9229120649867836	0.245223563142104	0.0021115589477808	16.444992872503747	0.5844005219688914	1.6253238043403715	4.399120259584023	2308.8261078670707	1	1.9051966625676289	1	0	0	0	0	1	0	0	0	1	1	1	1	0	0	0	1	1	0	1	1	2	0	0	3.9326097310138968	87.37757437070938	0.099974341385251	39.806031345401614	874	0	1
4076c3ded46d4e9a9b8f46b94555e505	0.05055224649045029	0.4093158369621834	5240.643245278099	0	0.0678507967919646	63.31072484861805	9.800704506726492	0.2053040790847231	0.2109562434329859	0.0733847275711218	0.0285930555770229	9.772111451149469	0.0469706585687356	0.5004486992796183	6.470409002500936	5240.643245278099	1	0.2082991357218356	1	0	0	0	0	1	0	0	0	1	1	1	1	0	0	0	1	1	0	1	1	2	0	0	2.982214131242516	5730.608793309439	0.2738642195129959	30.282236762403137	20925	0	1
6c3778e0003646ff998d12694ed3c2fb	0.047947289576156835	1.4278428424467369	13223.818970079732	0.0123807219849218	0.3032645707628351	695.3775537699454	73.98493915393145	0.5497389887427883	0.6809499874901791	0.0988545929246293	0.0219177863757923	73.96302136755565	0.2047411213296401	2.104777923494398	22.13267557779817	13223.818970079732	0.997991520977304	4.127877151485447	1.003161988274974	0.0136798429116894	0.0072771792734402	0.0044148224369249	0.0041292221777554	0.037383555307129	0.0030144140266804	0.0266346711867009	0.0041200278354174	0.998678594345172	0.9986042738017672	0.99963853046612	0.9993021369008837	-0.02665	0.0095620674558378	0.0020389568944897	1.0015441005754135	0.995094015456432	0.0292114048972173	0.0396315664890197	0.9975429900488568	2.003088201150827	0.026754394946075	0.00213601115367	3.8210598756785936	338.19061976549415	0.1132966900386915	34.78090912406813	2979.0046901172527	0.0020082545614729	1.0046901172529312
8571268bc2aa4fd6b1dfdf69b3b36439	0.04957154603823608	1.958324383119088	4773.968075378685	0.0057071621831074	0.9715741922134088	318.4196368497166	37.58588973248375	0.723669608301433	0.7292353531038474	0.2462320393252063	0.0226782106990953	37.56321152178465	0.4297468993541947	1.4737571027470882	12.399576912904925	4773.968075378685	0.9990904958681106	1.6482622959183415	1.0009242387368045	0.0009206677867665	0.0009215582602769	0.0009233446403188	0.0009242387368043	-0.000462343	0.0009242387368043	0.0106188078934302	0.0009233446403188	0.999537880631598	0.999537880631598	0.9998151522526392	0.9996919204210654	-5.34392e-05	0.0007851659006148	0.0009242387368043	1.0004621193684022	0.9981528636711196	0.0115430466302342	0.0004623430058915	0.9990757612631956	2.0009242387368045	0.0106188078934302	0.0004618958442808	4.322618594659927	130.62966333030027	0.0594311480119655	37.5487551343309	2196.0009099181075	0.0004547520659446	1.0013648771610557
a5ac7ad1d75d493ea63479195505e11f	0.05372965652976379	0.2098495920113574	13992.538377204528	0.0007848790693266	0.0500056963754218	985.217560813826	29.69544746748846	0.1488352289021595	0.1178021626224423	0.0787887822014074	0.022757923310866	29.672689544177597	0.0252102727631928	0.4823627505935139	24.235201238626875	13992.538377204528	0.9999002344492932	0.2105218977977822	1.0000952230309914	0.0001339649232391	0.000110111936403	9.819766759282496e-05	8.627293671710246e-05	0.0614953230323166	8.627293671710246e-05	0.0012828886403485	8.626490279668165e-05	0.9999568635316416	0.9999568635316416	0.9999827454126566	0.9999712423544276	-0.0557576	0.0026324991775226	8.627293671710246e-05	1.0000461198331163	0.9998214997950484	0.0014171842851241	0.0615801053828178	0.9999107436985248	2.000092239666233	0.0013309113484073	4.611765107748184e-05	2.5810783169493106	21530.337922777613	0.3580155296614056	24.655734653977607	60132.00029931159	4.988277535349232e-05	1.0001496557916791
0440da0199ff4cf39f4270dec310a3f4	0.045755092502311086	1.1167071168297065	600802.564164171	0.0058516846795534	0.1955906547295282	9108.051528946147	458.4744148243778	0.4154486602738984	0.5009785335432092	0.0912856233878715	0.0216681583541383	458.4527466660237	0.1511426447047105	3.651450991377059	88.09131475913767	600802.564164171	0.9992456406123502	13.160496753105123	1.0058738833922254	11.58697114840978	0.6668184892841994	0.0447760083690519	0.0374765324190621	0.0895589004820177	0.0037304387615714	0.0113715717132011	0.0374624973611999	0.999458262072169	0.9994086300036112	0.9999295579049268	0.999866358892436	-0.115287	0.0346514532632638	0.0003575296531256	1.002022458417596	0.998423910585732	0.012356367378292	0.335492380967498	0.9992116119540432	2.0040449168351926	0.0114753031676182	0.0205631351970285	2.707021037105097	15414.142895186524	0.3420728100838092	25.90854893562116	45027.00781163312	0.0179280968089238	1.0214819910787598
8ea3560fe3774856b45d08057b66d969	0.06701505690446752	2.0077162572443217	7570.931949923239	0	0.7998337104491315	20.45765094390468	13.703953489459886	0.7504300830819226	0.7473953290447582	0.2709859384866738	0.0264309462724276	13.67752254318746	0.3929053893788926	1.3653945862801355	3.407774032754653	7570.931949923239	1	1.3011570666487609	1	0	0	0	0	1	0	0	0	1	1	1	1	0	0	0	1	1	0	1	1	2	0	0	4.410884647984905	210.25092341787737	0.0517731897113709	29.719630959073346	4061	0	1
04057de135af43b08177e1812f4f69c4	0.0758735810987172	0.3976095965967411	8335.893880637781	0	0.0912749952093136	601.7692852021755	22.631355661670398	0.2086927127562948	0.1596995195905378	0.1090876710731295	0.0662811895953236	22.56507447207507	0.0502834956305823	0.4097393887889749	14.977091604677309	8335.893880637781	1	0.1243337183675814	1	0	0	0	0	1	0	0	0	1	1	1	1	0	0	0	1	1	0	1	1	2	0	0	3.410267924422297	9159.074720051558	0.1844653733998944	31.594503356833307	49652	0	1
6770e28d10fd47e8b84bb19146bf6dae	0.08858637763922296	1.558529644127784	26113.486126838277	0	0.5969994123027272	37.64459983861682	15.22543574099701	0.9808026668937144	0.4303657597660402	1.02381087515144	0.0151156420802143	15.210320098916796	0.2796260673676813	1.1675926398069507	2.5954163814814986	26113.486126838277	1	0.4012987011455418	1	0	0	0	0	1	0	0	0	1	1	1	1	0	0	0	1	1	0	1	1	2	0	0	2.523976201436793	7307.10180109632	0.3814722944973281	23.311778463633274	19155	0	1
c15aff41adc944ca99980b05d0751318	0.07937017633495304	1.3420214287986458	33840.997762284445	0.0009295401436732	0.6289449214392682	246.8075305693775	29.499127696470328	0.4876018711364492	0.4663925928711046	0.1671415489492287	0.0662811895953236	29.43284650687501	0.2990483023470381	0.8234238538117995	7.706996295325406	33840.997762284445	0.9998797932448148	0.4402712582905093	1.0000681959480244	9.076643367490591e-05	7.687000749423035e-05	6.992893434553056e-05	6.29815312049261e-05	0.0307377388134908	6.29815312049261e-05	0.0009623698156403	6.297700698044403e-05	0.9999685092343972	0.9999685092343972	0.9999874036937588	0.9999790061562652	-0.0237834	0.0018417630179338	6.29815312049261e-05	1.0000332289045426	0.9998705677602444	0.0010546844687883	0.030795506943003	0.999935280329855	2.0000664578090843	0.0009917029375837	3.322761638761417e-05	2.989523340726258	14178.841277473904	0.284082492385925	29.0534755816386	49905.00036064194	6.010337759268841e-05	1.000180320971329
adf72ea153db46aabdf50006d3e7c0e4	0.10777421139542401	1.52135929156741	72822.47309115992	0.0003292609306702	0.8561837943671444	7032.659448457488	104.71569877315233	0.9152630781897868	0.4544448453755356	1.0076583436289963	0.0410043107639346	104.67469446238836	0.3334919829354598	1.1838767703857949	51.43172033103094	72822.47309115992	0.9999615081121797	0.5638577051616568	1.0001115856890668	0.0071406026782027	0.0017852057537511	0.0004463289833456	0.0004463427562676	-1.39484e-05	0.0001115856890669	0.0004603113896081	0.0004463289833456	0.9999776828621866	0.999973744543749	0.9999891135913104	0.9999876015901036	-1.15066e-06	2.369320699104066e-05	1.7435263916703275e-06	1.0000557928445335	0.999944208446678	0.0004882078118745	1.394842633871461e-05	0.9999721035777333	2.0001115856890666	0.0004603113896081	0.0002231679349033	2.3527576328407767	22159.90165133377	0.4264964327213089	21.499775134683787	51956.00003849263	0.000307935102563	1.0004619115439393
b66162187d5a4d5eac8ab7cfbba0e1c2	0.08890156613168608	0.9227860694660408	282.9522570100743	0	0.2392784702517005	14.582326112718906	3.6768064632249846	0.3798208659938756	0.3221916098699958	0.1890579787585006	0.0546550986377996	3.622151364587185	0.1276319036886541	0.6479278280343858	3.2006223075263405	282.9522570100743	1	0.2755465800970189	1	0	0	0	0	1	0	0	0	1	1	1	1	0	0	0	1	1	0	1	1	2	0	0	3.686769022699489	62.99109792284867	0.0934586022594193	10.54101031091231	674	0	1
d4fb3f5fbe144e5b817edb15d3b337f4	0.08362491680181189	1.149610274806618	821884.0520184065	0.0011923719512399	0.315247324915675	12464.194777134067	902.3594791872024	0.4767299505548696	0.4957481079015211	0.1491824852855768	0.0473505930474594	902.312128594155	0.1860623562625676	8.064608402291729	111.2651445881246	821884.0520184065	0.9998417471128758	64.81063723655829	1.005260697315672	245.2961848545028	6.814802723235494	0.1893567578907829	0.189385103364199	-7.30707e-05	0.0052606973156721	0.0020701134555213	0.189356757890783	0.9998578189914684	0.9998539821870748	0.9999289361713454	0.9999279356532098	-6.9524e-06	0.0001241164443026	0	1.002630348657836	0.999707771845279	0.0022162439365119	7.307070879168785e-05	0.9998538695190092	2.005260697315672	0.0020701134555213	0.0946854653137455	3.7625617585701714	1549.7250138482234	0.122633933199986	40.406816849566624	12635.000158265411	0.1025478708565016	1.1082535411885732
ec822936dd6d42659af69c227f40d91b	0.08341472701930026	0.4893253397539578	1130.6552466744902	0	0.1152059392955304	43.75211925834631	5.895775052515717	0.246027070411879	0.1947002112598717	0.1247720367674783	0.0453675162808053	5.850407536234911	0.0635935342512014	0.4473036556682493	5.307192116889012	1130.6552466744902	1	0.1395512409987281	1	0	0	0	0	1	0	0	0	1	1	1	1	0	0	0	1	1	0	1	1	2	0	0	3.763802692393692	653.6083878959477	0.1156624292861347	47.38986956172239	5651	0	1
08b7461e4a644c65a44b5e5ce4862934	0.08097120242237743	0.44872553036495	19481.064950451368	0.0003427346797114	0.1048370639524161	21150.475783998845	105.01036066233488	0.2303245033972628	0.1770061342180717	0.1207183782090985	0.0690526245284763	104.9413080378064	0.0569164103089004	0.6258824170343605	118.94756451164538	19481.064950451368	0.9999597844446396	0.3386794230875775	1.0000408153915428	0.0026119008511121	0.0006529929745169	0.0001632571252415	0.0001632615661715	0.615379513391282	4.081539154288197e-05	0.0001696565082074	0.0001632571252415	0.9999918369216916	0.9999903963784604	0.9999960180105814	0.9999954649564952	0	8.666404942487072e-06	0	1.0000204076957713	0.9999795927205656	0.000179860356093	5.1019933332669e-06	0.9999897961521144	2.0000408153915425	0.0001696565082074	8.16296728532724e-05	4.043787747602287	4708.538879169934	0.0946801568271286	42.40949235401875	49729.00004021637	0.0003217244428844	1.0004825963684625
7d079c9ce6e64e26b9e2e293e5dc1b8f	0.23504873267949697	1.3166547914646023	69134.9943575367	0	0.61820784541908	96.73702565483018	20.23572346724875	0.8874492024264741	0.3416263293649079	1	0.0983017102910954	20.137421756957654	0.254483436294588	0.987432625888189	2.416270087487104	69134.9943575367	1	0.1874571037810593	1	0	0	0	0	1	0	0	0	1	1	1	1	0	0	0	1	1	0	1	1	2	0	0	2.4258373018373804	28503.569401743152	0.4019909373218508	24.98697046158505	70906	0	1
d99a8e4b93394cc0b18b40d9b2d1a651	0.0720199461109726	1.400777192666396	364.7250546601728	0	0.5084787239830066	11.449062169995534	5.097169494773677	0.502564344797551	0.4745824759323852	0.2081799178015686	0.0343860922649288	5.062783402508749	0.2698389491366959	0.8319121964372039	2.536956876079213	364.7250546601728	1	0.4395069819191813	1	0	0	0	0	1	0	0	0	1	1	1	1	0	0	0	1	1	0	1	1	2	0	0	4.3093492845774	34.191650853889946	0.0648797928916317	38.917059435636894	527	0	1
e25c1b5e9c7f4c5b89b6be6e954a8762	0.06189834954612013	1.558031193045568	38193.13075196061	0	0.9326500100587454	6.169226714688471	7.538611149855692	0.9167996695372912	0.4785635376357587	1.0175412072272148	0.0269427212282178	7.511668428627474	0.3597262230674038	1.1055756530536949	0.7156273685196702	38193.13075196061	1	0.3817758905614176	1	0	0	0	0	1	0	0	0	1	1	1	1	0	0	0	1	1	0	1	1	2	0	0	2.0936577576633786	14951.089864627003	0.4784808098258074	20.54089147421019	31247	0	1
fdb67665d4fc485d81ea4d1ca15df936	0.1700974014601081	1.3468536429918112	18897.58438324781	0	0.7628588084263885	32.71469404186648	15.774231500254112	0.6454919675055083	0.4178903072552991	0.4530171018222235	0.0947144451247019	15.679517055129413	0.3119692069687961	0.8277780177616645	2.2545467291459014	18897.58438324781	1	0.2685565665752984	1	0	0	0	0	1	0	0	0	1	1	1	1	0	0	0	1	1	0	1	1	2	0	0	3.927869934169233	2852.446390369484	0.1034282022687365	40.730264064872856	27579	0	1
734809f617514040918ab5156e3eb959	0.01783748894220735	3.8838679874383	3761.801735481001	0	1.9297308551377867	23.569851185972016	22.208589695826173	1.6474688193737683	1.3532444342936352	1.1813152510922973	0.0012898421124251	22.20729985371375	0.8005003667568026	2.651679677685184	3.342187336718886	3761.801735481001	1	4.317251602239801	1	0	0	0	0	1	0	0	0	1	1	1	1	0	0	0	1	1	0	1	1	2	0	0	3.922234174850311	51.94953271028037	0.0971019302995894	33.41984103415145	535	0	1
7be20b0bb280419eac6dfff630fae625	0.035431716330466496	2.004124232068888	8910.788788502136	0.0046521180038684	1.2254114201240025	536.1312441353375	52.556610292888266	0.970780218092236	0.727928574077189	0.8640267862675883	0.0089477903569481	52.54766250253132	0.4941798840865945	1.7942172674407533	17.72936312369968	8910.788788502136	0.999277717681847	2.2768013709433537	1.0019344553780476	0.0154155198062391	0.0077152569197628	0.0038651475371027	0.0038689107560947	-0.000483849	0.0019344553780473	0.0110764514060508	0.0038651475371027	0.999355181540651	0.9992262178487812	0.9997023914803004	0.9996131089243906	-5.60628e-05	0.0008216872718378	0.0002418069222559	1.0009672276890238	0.9980669558290748	0.0120436790950742	0.0004838491607671	0.9990327723109764	2.001934455378048	0.0110764514060508	0.0019335145732993	3.9218439501458304	308.40823699421964	0.1114191607638076	37.76417469260584	2766.000722543353	0.0014445646363059	1.0028901734104043
b724c4c1d4ec4a99b5602059b018ca2d	0.06152031259474806	0.7744917211153153	64.93820816738162	0	0.264875870005965	19.249370760828583	3.2777835876901875	0.3283857799466165	0.2793001060019406	0.1516952323857587	0.0214307388268286	3.256352848863359	0.1263430006753251	0.5830871450112673	3.7526037741203138	64.93820816738162	1	0.2321533982062429	1	0	0	0	0	1	0	0	0	1	1	1	1	0	0	0	1	1	0	1	1	2	0	0	4.054487278443158	12.434554973821989	0.0651023820618952	18.86033825827143	191	0	1
48e281991068442a9bb048bedea3e3e4	0.06795258836354441	1.45635356533034	2037148.2477769589	0.005400533307449	1.0009338910079122	12691.547463390729	792.3569072739392	0.711388989752725	0.6368633328196011	0.3173038550509741	0.0253934152943477	792.3315138586448	0.4241129188451452	5.499213833521687	106.76623308463698	2037148.2477769589	0.9992876079406856	29.73527849205489	1.0090624141235318	80.79568644576165	2.7650620531586414	0.1071963074486357	0.092263342480119	0.0754733578862531	0.0049443236279052	0.0103809489794587	0.0922385884177305	0.999507482229168	0.9994772385172424	0.9999411993450126	0.999898338337609	-0.0877125	0.0267036333503302	0.0003977988574753	1.0026610400318403	0.998528170553101	0.0112502455747633	0.2648018464916717	0.9992637735391642	2.005322080063681	0.0104983980322207	0.0498649124821887	2.5824775564241595	24316.2152071612	0.3609728665166516	27.17455199913471	67315.01113370841	0.0437572550126837	1.0485132788029037
8bbc386b4212436283326f31db2adb7d	0.059378518462637586	0.3362413570123001	29397.83651203412	0.0012866679281111	0.0771923570518874	8460.682307202645	102.6944488895238	0.2095253833901545	0.1920584296941582	0.0926419440313598	0.0304255717377423	102.66402331778606	0.0419499580505468	0.7548089527855506	68.27338950423263	29397.83651203412	0.9998449664986696	0.5258356689204282	1.0002983562015453	0.0107286303611798	0.0027060199079748	0.0007816708803344	0.0007194692437196	0.0472862715828799	0.0002750001739386	0.0021922340964152	0.0007193912918505	0.9999134632157128	0.999902867724312	0.999979611049596	0.9999629147206388	-0.028592	0.0022805151389572	7.57039519070206e-05	1.0001413927582372	0.999721130627266	0.0023355731902852	0.0544587882908474	0.9998605535773968	2.0002827855164744	0.002196126767683	0.0003752850310135	2.869625880198945	13205.642841915542	0.2559282707400442	30.201758798789992	51591.00042636485	0.0004263408140833	1.0007364483807826
8d2f4452d4bc47a1b367c5be5bc7b017	0.069730504708486	1.652359474539829	233989.530350519	0.0013434806261093	1.0696339533343593	20579.01481787084	452.7829665916272	0.7756778221815042	0.6270960456640865	0.5094678315184891	0.0251757362712476	452.7577908553559	0.4530025240717802	3.1361800789530005	138.43001650857673	233989.530350519	0.9998318727283232	9.233949403797409	1.0014448166533014	7.456913522250241	0.4128475736456823	0.022957510021172	0.0226649962377381	0.0084536154245314	0.0013630097013466	0.0026128463085851	0.0226630215243069	0.999880700313364	0.9998772176360744	0.9999666815989602	0.999960677746534	-0.0470096	0.0031767089350378	0.0001060791129031	1.0006855951982712	0.9996481796004651	0.0027887764489336	0.0544770069658934	0.9998240698596508	2.0013711903965423	0.0026128463085851	0.0114056265647275	3.5527215749156085	4025.3491382934008	0.1692034106050189	39.683603783349504	23786.00025220681	0.0136605643361478	1.0152585119798234
0cf987c39160443c926bab65f2ff6ad6	0.09205706134100601	1.2022246492827522	37266.79767002508	0	0.6263689028752116	10.252283140042382	8.388899573863275	0.4849091511136593	0.3855549855083029	0.2588264746663465	0.0234058953862752	8.36549	0.2676038905011396	0.6865969342211689	1.8839704527926933	37266.79767002508	1	0.2362784652481381	1	0	0	0	0	1	0	0	0	1	1	1	1	0	0	0	1	1	0	1	1	2	0	0	2.604799155625245	28352.25996483372	0.3586487541881234	25.32203036758829	79053	0	1
3da5e92ab1984aba8a0479595f915d9d	0.056148318971764345	0.4582314377606865	13506.0840894384	0	0.1077679318241112	65.63340993406077	13.034584569160474	0.2197639952548316	0.1996710899832924	0.0956305131974091	0.02354389714539	13.011040672015085	0.0607915012745474	0.448943486731046	5.891337631593546	13506.0840894384	1	0.1532540406678632	1	0	0	0	0	1	0	0	0	1	1	1	1	0	0	0	1	1	0	1	1	2	0	0	2.9613143979108387	16886.12450194744	0.2519903374363528	30.22172235162069	67011	0	1
8371a615b5aa41159cf31cb6e9ed5faa	0.08670935620717454	1.5825660124015783	107512.99597353344	0	0.7898471283609091	12.760800744868575	16.04998234804521	0.9329352734547078	0.4554049500319665	0.9878333505262236	0.0182626923620257	16.031719655683183	0.3244981504826077	1.1114399679976603	1.142195453771348	107512.99597353344	1	0.36493057800663	1	0	0	0	0	1	0	0	0	1	1	1	1	0	0	0	1	1	0	1	1	2	0	0	1.7494811575665676	50910.93650757175	0.5849545753104736	15.745236951869312	87034	0	1
c35408b2bc864e989ece709448db6f30	0.06483409701836132	1.165343464314766	9549.353656164809	0	0.3668019902397917	11.052332215486764	5.618242718655964	0.3961476803407226	0.372268685717911	0.1589364773818144	0.0288136023972662	5.589429116258697	0.2021114163095154	0.6593881802211107	2.5020250370970447	9549.353656164809	1	0.2778597875759727	1	0	0	0	0	1	0	0	0	1	1	1	1	0	0	0	1	1	0	1	1	2	0	0	3.4061010685384043	3745.2449574284014	0.1705251995368757	34.17777250468403	21963	0	1
e4ffaf575cab4e5e923fc29075c3cbdd	0.06816274147503024	2.2199637640452274	3349.645653433694	0	1.2290849810785338	13.087188317661004	10.05615582082105	1.042830880468639	0.7208053737517454	0.8783823403877804	0.0209783417403994	10.035177479080652	0.498839327951475	1.4352883603612536	2.168258948257772	3349.645653433694	1	0.9725564321294988	1	0	0	0	0	1	0	0	0	1	1	1	1	0	0	0	1	1	0	1	1	2	0	0	4.163198416845983	131.12423124231242	0.0806422086361085	44.793633286886376	1626	0	1
04e83e82986a49bc929bd622f9ffe53b	0.025705873532416906	1.537985490169332	59708.15522332015	0.0003423377283772	0.6458479606139486	127.42146859607858	29.4720026818883	0.9295761093105832	0.4365116397472838	1.0162226460155936	0.0162498594167985	29.4557528224715	0.3155476638754209	1.0950358033040457	2.7102092929341857	59708.15522332015	0.999959835324848	0.334991667516735	1.0000437283220842	4.372066997950242e-05	4.372258279636729e-05	4.372640893254252e-05	4.372832208437471e-05	-2.18646e-05	4.372832208437471e-05	0.0006963019238766	4.372640893254252e-05	0.9999781358389578	0.9999781358389578	0.9999912543355832	0.9999854238926388	-1.86394e-06	3.713981577759181e-05	4.372832208437471e-05	1.000021864161042	0.9999125462255593	0.0007400302459607	2.186463934040044e-05	0.9999562716779156	2.000043728322084	0.0006963019238766	2.1863682754229303e-05	1.9729066764060457	25904.793268265254	0.5202392510797537	17.244132373960866	49792.00004016548	2.008233757599525e-05	1.0000602482226777
5926a3fd4e024285a954d0b6752c1ed7	0.04511819204305788	0.604875972773484	3307.435328562869	0	0.1627987486995725	53.55647627215017	9.888404755654332	0.2521482394632309	0.2497664655192301	0.0918938400507909	0.0214074208213007	9.866997334833032	0.09004239976606	0.5303700025089974	5.539135537702832	3307.435328562869	1	0.217713604896987	1	0	0	0	0	1	0	0	0	1	1	1	1	0	0	0	1	1	0	1	1	2	0	0	3.829581045559188	1368.1758802517436	0.1163612757485748	41.35193988792697	11758	0	1
c649376932d24d278e84207f335af5b7	0.1646246275516014	1.4863082268384291	60183.93470399804	0	0.4734795207499866	21.140096739194867	14.802681515507649	0.986075234386214	0.3598523899385549	1.046332190121272	0.02096662949724	14.781714886010407	0.2333942627166185	1.1024161980844416	0.7809694789903282	60183.93470399804	1	0.242977105929128	1	0	0	0	0	1	0	0	0	1	1	1	1	0	0	0	1	1	0	1	1	2	0	0	2.3158903659325545	21616.531552270757	0.4365124200292957	19.68133657699704	49521	0	1
d3e2b6f8dd9c478ab6078a70517f4c4c	0.05734015727332836	1.3484580584906576	9787.029090874414	0	0.598934571126786	11.197584406575425	7.191810539970209	0.4903894816042512	0.4596523601989287	0.1984384372463641	0.0166245220872325	7.175186017882977	0.2829679569459759	0.7948766339463994	2.361357453280715	9787.029090874414	1	0.3913470195258722	1	0	0	0	0	1	0	0	0	1	1	1	1	0	0	0	1	1	0	1	1	2	0	0	3.903270904913808	1673.8743705616528	0.1080616120440059	44.06825588553143	15490	0	1
41f88cf86c2d46c7814ffc139f7f24b5	0.0470515580596869	1.416469872564546	8586.286548115993	0	0.9720420773561732	5.462426931037041	4.970798083704068	0.6058959983326658	0.5210829731367935	0.3402818671786596	0.0183049895915538	4.952493094112514	0.409118556136419	0.8673667712857145	1.2915970726623711	8586.286548115993	1	0.3852151551350671	1	0	0	0	0	1	0	0	0	1	1	1	1	0	0	0	1	1	0	1	1	2	0	0	3.5693506350915687	1975.147200560764	0.1730611759012323	43.54994896265079	11413	0	1
f64cef8b8d1f4deab802a10054269bc1	0.03725948350716727	0.2429898062513644	12850.84832291049	0	0.0419418907618205	197.3374399063092	15.729570091861325	0.1415032505789734	0.141181755928808	0.055953278279745	0.0190263144947084	15.710543777366617	0.0264951498264185	0.3757652109031896	10.01956525307653	12850.84832291049	1	0.1211763238007028	1	0	0	0	0	1	0	0	0	1	1	1	1	0	0	0	1	1	0	1	1	2	0	0	2.718937778339921	29374.312684041663	0.3227520841651833	30.949367197359265	91012	0	1
fc5f5cd51e3341559c4c0ef3c71ab9a6	0.04029516746336707	1.7133254716746569	8318.106050834824	0	1.1383555952224438	6.103857476687261	7.173885212729639	0.8225894959385326	0.5849749564355637	0.8074719169018012	0.0093340667584979	7.16455114597114	0.4547899922145805	1.0949519939059469	1.1446320432973265	8318.106050834824	1	0.5222663901301989	1	0	0	0	0	1	0	0	0	1	1	1	1	0	0	0	1	1	0	1	1	2	0	0	2.952813989735449	1977.17670798501	0.2849779054460954	27.952513391060517	6938	0	1
0f0a0d3844dc46759992835efe7138b9	0.09596621762454506	1.7273355160396973	30996.607193236687	0	0.9743200753782996	6.766014875396703	7.90502376397133	0.9530766606666788	0.5213678507473439	0.98233463215673	0.0289015879277501	7.87612217604358	0.3827424684027075	1.1672310573807063	1.0543952276787256	30996.607193236687	1	0.4540732202065349	1	0	0	0	0	1	0	0	0	1	1	1	1	0	0	0	1	1	0	1	1	2	0	0	2.5723857898449505	8608.254714078503	0.3783681910280208	25.131432680461984	22751	0	1
42553b875bae4742beba9f03d6d90497	0.06142743938999782	2.916798232354604	126.28214012013385	0	0.9795853065942532	8.42922799914074	6.464935797393033	0.9663439443054492	0.9071172528927204	0.5290439339167989	0.0328348982070597	6.432100899185973	0.4440007796251047	1.63916260484103	2.320224296996445	126.28214012013385	1	1.7530334264134166	1	0	0	0	0	1	0	0	0	1	1	1	1	0	0	0	1	1	0	1	1	2	0	0	3.9241805435267656	3.5106382978723403	0.0746944318696242	21.935717519239475	47	0	1
a197ede594bb482784792aca273ef4f1	0.06426227899857745	0.6454214135685105	728.1986840002603	0	0.1713154110479396	29.437674402057	5.06278591849294	0.2900402847632432	0.2675398933652759	0.1217098255887491	0.0252852714153942	5.037500647077546	0.0908863459951691	0.5817063590027276	4.631848515869374	728.1986840002603	1	0.2542589213186669	1	0	0	0	0	1	0	0	0	1	1	1	1	0	0	0	1	1	0	1	1	2	0	0	3.392689397354228	359.65520446096656	0.1671260243777725	33.35270034963585	2152	0	1
ae1ff6adea4a4ab296843853ed47bcab	0.06874613879318472	1.1053282307626455	41511.955834434906	0.0002269540880761	0.2574853183282483	257.3544088015617	40.78081119455459	0.3803221811977226	0.3775554144447746	0.1349505794768078	0.02128848277721	40.75952271177738	0.1637389356558186	0.7297153264502501	7.290336981560435	41511.955834434906	0.9999743458183727	0.3878394961454017	1.000007949771187	7.949299826333342e-06	7.949417662116573e-06	7.949653344204951e-06	7.94977118700282e-06	0.4615344866234073	7.94977118700282e-06	0.0001390202416452	7.949653344204951e-06	0.9999960251144066	0.9999960251144066	0.9999984100457626	0.9999973500762712	0	6.751924546023162e-06	7.94977118700282e-06	1.0000039748855936	0.9999841006343902	0.000146970012832	3.974915054285848e-06	0.9999920502288132	2.000007949771187	0.0001390202416452	3.974856132801942e-06	2.7998082502486645	24274.65233007093	0.311377164023024	27.912711801678995	77957.00002565452	1.2827090813692428e-05	1.0000384817660566
939848b832fa4d34969f26d8c2bf98b9	0.06378815381128272	0.2515216258928303	9866.209066992924	0	0.0504169158863194	135.3686271315228	11.388617898127936	0.161000952547228	0.1223011159277922	0.0873244914372492	0.0330207510905882	11.355597147037347	0.027673744881945	0.3486186634320339	9.12726583738254	9866.209066992924	1	0.095613665772023	1	0	0	0	0	1	0	0	0	1	1	1	1	0	0	0	1	1	0	1	1	2	0	0	2.496079204047281	28274.329908844546	0.3482918195225984	32.35001554066919	81180	0	1
a924ba0fdab44ee38843ef75a928f827	0.04692174443402066	0.3155475751147951	26654.755657534697	0.0006839331155688	0.0492603858803676	16405.36669464798	117.82897173379124	0.17996764580383	0.1877627056119721	0.0640320051664691	0.0414347734695476	117.78753696032167	0.0332672252111396	0.7312092957774361	106.02002973230368	26654.755657534697	0.9999197665206474	0.5022786806951612	1.0001229407504704	0.0065637564009961	0.00150441196041	0.0003781881660344	0.0003156653730149	0.0615225677505605	9.94897844860408e-05	0.0005899675119961	0.0003156538454808	0.9999746157921074	0.999969813505362	0.9999914702935268	0.9999876393292646	-0.0769244	0.0023350035225695	6.054968152160682e-06	1.0000536533865738	0.9999296834371983	0.0006251266787333	0.0769396267791121	0.9999648408332624	2.000107306773148	0.0005899675119961	0.0001734633847623	2.966054915616063	14056.453794154815	0.2819580324986423	35.61173609704851	49849.00012035384	0.0004011649825879	1.0006418871482157
094fb27aa96041d481e4f3da1d3265cf	0.05563612089413128	1.6610676701496467	54216.69479057843	0	1.041514084774278	7.58809918822964	9.326189426171384	0.9152544429428228	0.5373356154220109	0.9902262590292812	0.0165897236384427	9.30959970253294	0.4073846274293401	1.1446877083923397	1.1103603290412305	54216.69479057843	1	0.4726192544179294	1	0	0	0	0	1	0	0	0	1	1	1	1	0	0	0	1	1	0	1	1	2	0	0	2.2036159852701247	19141.46291417937	0.4626111828837125	20.897662203924156	41377	0	1
1f07e2c89528491198d8da4c68dcb164	0.045824325082187846	1.652072733111722	13712.925850200589	0	1.0176138525411853	16.77824167107037	13.707898250095148	0.6380123823260406	0.6013592669623559	0.2598285141130497	0.0140437714392037	13.693854478655943	0.43054377750566	0.9988325615484812	2.3168347004959355	13712.925850200589	1	0.5906066860081511	1	0	0	0	0	1	0	0	0	1	1	1	1	0	0	0	1	1	0	1	1	2	0	0	3.6609394693692874	1908.2066933430335	0.1388291519347423	44.818036064835766	13745	0	1
5d3251c6afcf4b4c888152f793707770	0.037862572146040684	2.2998454933878034	31177.453340883025	0.0016322376741146	0.9384270715710498	63.48447477404336	31.4609842771147	1.3029113825807177	0.7527571126345934	1.1759740162185417	0.00078125	31.4602030271147	0.4260004292642668	1.869134433342399	5.305712364402282	31177.453340883025	0.9997759103669596	1.796085459047814	1.0002904855049854	0.000290144145059	0.0002902294216709	0.0002904001269774	0.0002904855049855	-0.000145264	0.0002904855049855	0.0038294516353492	0.0002904001269774	0.9998547572475072	0.9998547572475072	0.9999419028990032	0.999903171498338	-1.4778e-05	0.0002467337976023	0.0002904855049855	1.0001452427524928	0.9994191570570408	0.0041199371403345	0.0001452641001643	0.9997095144950146	2.0002904855049857	0.0038294516353492	0.0001452214079907	3.086070227333758	2044.7364410578216	0.2291277948294287	36.71504693953281	8922.000224114747	0.0001120448165202	1.0003361721201256
7c7cb050eb6d4dc7a2b809005f4c63bc	0.060599236735885735	1.1778573209965613	718.917852576534	0	0.3721222597001065	34.975164277541595	9.235037666476128	0.4685651401138934	0.4437223880799078	0.1945687745113094	0.0260648340223655	9.208972832453762	0.1881282116535474	0.9100804216859624	4.641814081808381	718.917852576534	1	0.6086930834061465	1	0	0	0	0	1	0	0	0	1	1	1	1	0	0	0	1	1	0	1	1	2	0	0	4.024942828552538	65.86405529953917	0.0758802480409437	24.632631824842324	868	0	1
bad205d63f2346c49ea469e65d0a4b07	0.04253928788181456	0.6840115749637291	36491.087738697264	0.0005827448835518	0.1264838087538108	1654.4996102643445	71.58751591710954	0.2849000258023504	0.3241284654135912	0.0784090179871271	0.0171088985573319	71.57040701855222	0.085645546922049	0.7839558283872056	22.35866556369256	36491.087738697264	0.9999326332808866	0.5334187161600898	1.000036095134108	0.0001896455886692	0.0001019027721271	5.803213950778258e-05	5.803378260587991e-05	0.0769111008132809	3.609513410808488e-05	0.0004275593184999	5.803213950778258e-05	0.9999856088743624	0.9999841462977958	0.9999952091747468	0.999992073148898	-1.00604e-06	2.1340034485077035e-05	1.689881667251422e-05	1.000018047567054	0.9999497493810912	0.0004526851283587	1.2563090491818886e-05	0.9999748741901408	2.000036095134108	0.0004275593184999	2.9016480528415627e-05	3.223865156324924	13427.985397894738	0.2261555435434903	34.788697288261496	59371.00010105263	8.420797340720222e-05	1.000185263157895
66980d6d66e24f8e8740d986b747e051	0.06276130713112191	1.8446725237938408	4401.064937616242	0	0.811590701726382	48.48741164723133	15.522636639019291	0.6648013518329412	0.6561496113462231	0.2419483243681616	0.0332422532282223	15.48939438579107	0.3768319877104501	1.2049968736043752	4.7312383062408925	4401.064937616242	1	1.0100566279974126	1	0	0	0	0	1	0	0	0	1	1	1	1	0	0	0	1	1	0	1	1	2	0	0	4.3087018647566095	188.39359947212145	0.0621555920396309	37.142830801175705	3031	0	1
ea4bc4257fbe4f4e8befcb7fe3e4cdc7	0.0626885280605134	1.332642377818399	23430.881900367614	0.001057612195117	0.4081223945044504	5908.384871258552	114.72998154528142	0.4573108357110567	0.4835309359165881	0.1302623961490376	0.0321101175689151	114.6978714277125	0.242924085153519	1.2743574162126348	62.30581227160997	23430.881900367614	0.9998613902564008	1.4148536237973963	1.00007049972578	0.0045106037777187	0.0011277370949787	0.0002819773588972	0.0002819989031199	0.7692219564284053	7.049972577998168e-05	0.000266470703463	0.0002819773588972	0.999985900054844	0.9999834118292282	0.9999931219779726	0.9999921666971356	0	1.49695233240891e-05	1.1015582153122135e-06	1.00003524986289	0.999964752156881	0.0002840956349079	8.812802363789816e-06	0.999982375068555	2.00007049972578	0.000266470703463	0.0001409940655042	3.3958582634361867	2481.3416967008598	0.1719809881273121	33.50777200310304	14426.00013861935	0.0011088779487933	1.0016634322151372
eabcaf2242004294859b0dcc6aa29051	0.04951717000361535	0.1924651482220398	6497.122680946329	0	0.0363206811018109	140.36693782049386	10.51881675945308	0.1391861468614688	0.1196924436920659	0.0678657393888585	0.0409333036430269	10.477883455810051	0.0202109571385788	0.3618420418912902	9.66880241611919	6497.122680946329	1	0.1115568798019158	1	0	0	0	0	1	0	0	0	1	1	1	1	0	0	0	1	1	0	1	1	2	0	0	3.1189661164870808	12471.514761300205	0.2513252878967455	28.39808326801089	49623	0	1
1cc3526ce168494f96704348a44d30fc	0.04902163192238277	1.754246720527709	14996.9338117801	0.0017301564409276	0.861557405424235	95.2311365108139	30.44704227550328	0.7236538841009348	0.6738773552477205	0.3315800389050082	0.0166981788862865	30.43034409661699	0.3788470951370033	1.338962039755708	6.3488219857968495	14996.9338117801	0.9997609371298808	1.2691443999323968	1.0001410567437965	0.0001409668423827	0.0001409893082427	0.0001410342627465	0.0001410567437964	0.0768525429304416	0.0001410567437964	0.0019877591699995	0.0001410342627465	0.9999294716281016	0.9999294716281016	0.9999717886512408	0.9999529810854012	-6.74527e-06	0.000119807338022	0.0001410567437964	1.000070528371898	0.999717920233982	0.0021288159137957	7.053399263529182e-05	0.9998589432562036	2.000141056743796	0.0019877591699995	7.052275163575707e-05	3.043821355611177	2222.5191870890617	0.2656926703035339	29.529550538795377	8363.000239091452	0.0001195314350596	1.0003586371787208
22844ab1df664da999cccefe52af2261	0.07796918337582645	1.2384536280344172	10112.534251870517	0.0010796538578365	0.5314929935080175	690.0560820343424	38.88263751149368	0.4342868687786226	0.4393118385448752	0.1186977519496394	0.0433554474106964	38.83928206408299	0.2686022738477562	0.8467871322071086	16.362453961060258	10112.534251870517	0.9998581962570944	0.5284433628779985	1.0000366727517078	3.666106325431527e-05	3.666398478375546e-05	3.666982924406544e-05	3.6672751707810734e-05	0.5384432013550395	3.6672751707810734e-05	0.0005522916725025	3.666982924406544e-05	0.999981663624146	0.999981663624146	0.9999926654496586	0.9999877757494308	-1.64729e-06	3.1147586055514866e-05	3.6672751707810734e-05	1.000018336375854	0.99992665888028	0.0005889644242102	1.8337106498941567e-05	0.9999633272482922	2.000036672751708	0.0005522916725025	1.8335645237969035e-05	2.5477728667877058	5311.233425512302	0.3766030933498052	24.912028349647223	14101.000141813798	7.090187145293616e-05	1.0002127206977238
4dc30d1c56ae4181beaaad24b495d5d5	0.11110136201962517	1.568300279652982	5388.67974354359	0	0.7847648005287559	76.46882852389334	18.717343972403324	0.6484109067475278	0.5209303326270407	0.3536376549746339	0.0473140243542572	18.670029948049063	0.3402660776457326	0.979639541860018	4.664493225343515	5388.67974354359	1	0.5392569279865551	1	0	0	0	0	1	0	0	0	1	1	1	1	0	0	0	1	1	0	1	1	2	0	0	4.303704636044103	350.46322350845946	0.062415534017535	38.60166292266692	5615	0	1
a3a58453c4334aa08c7b37809bcecb70	0.07887552712007917	0.48164688662186	21897.771213739827	0.0003448808416762	0.1215102198062894	19791.19830347588	109.95763197669176	0.2405293246569265	0.1894548918861368	0.1224580456125594	0.0684754566769278	109.88915652001484	0.0650150696049573	0.6658359723198369	114.18206755211516	21897.771213739827	0.9999595092521524	0.3854831860151856	1.0000211664685417	0.0013545296405657	0.0003386401813265	8.466393119190544e-05	8.466587416666958e-05	0.7692281233918423	2.11664685416674e-05	8.918748817807493e-05	8.466393119190544e-05	0.9999957667062916	0.9999950196544608	0.9999979349786788	0.999997648170162	0	4.494308975490792e-06	0	1.0000105832342707	0.999989416947883	9.447910531341789e-05	2.645838926996379e-06	0.9999947083828646	2.000021166468541	8.918748817807493e-05	4.233245133964376e-05	3.711967761725128	6935.942117304072	0.1404235846639012	36.22490537114784	49391.00004049157	0.0003239259827801	1.0004858988115726
afa0b0c054b743689e52e68e62e886e8	0.12185023642380059	1.247700901587668	1425109.797550572	0.0041717272945528	0.5304741276918519	33194.32290822429	1063.9215018590935	0.5566934194850675	0.4619576657947023	0.267589004790959	0.0611533757556148	1063.860348483338	0.2452377308066507	5.365261053204975	174.9196360319872	1425109.797550572	0.9994345368405988	28.47611860574019	1.003147041157028	65.78626956488598	1.4272325883396095	0.0339617699305865	0.0267182569384183	0.0812561844357865	0.0012082204005473	0.0052502950333634	0.0267151965658904	0.9997845979467392	0.9997726269609928	0.9999914951492328	0.9999799051443924	-0.0778916	0.0154049183084793	0.0002908278638345	1.0006676143182305	0.9992189138688522	0.005837072536976	0.1689471138064137	0.9996093543454744	2.001335228636461	0.0054311562144412	0.0151700067172512	3.491174126867687	8369.056961641789	0.1690479520399496	37.13000640513863	49479.005615367525	0.0434055838398226	1.0465186741268913
0a78ef54dc804ca48c5ac3f73a4aa118	0.02637149267498389	0.4890807771863141	9.834648571997404	0	0.1355825087744507	12.291028716770851	1.4218157092637236	0.1700488959662175	0.1557393133579209	0.0700436043241876	0.0146514396356697	1.4071642696280535	0.0810623648854126	0.2874788786103024	2.780892411087219	9.834648571997404	1	0.0537274786277075	1	0	0	0	0	1	0	0	0	1	1	1	1	0	0	0	1	1	0	1	1	2	0	0	4.123188377134511	8.025210084033613	0.0674387402019631	22.174987642115667	119	0	1
230c651296574bafaf69c75cdae79ff6	0.05415016012038852	1.695010192398278	47281.96255597821	0	1.0964052778480882	8.04940736237902	8.54221651855815	0.8474495615439905	0.5696406105738596	0.8454375565950997	0.0145263696698528	8.527690148888297	0.4307625088710518	1.1209802231982082	1.4422665917655046	47281.96255597821	1	0.5384259014404025	1	0	0	0	0	1	0	0	0	1	1	1	1	0	0	0	1	1	0	1	1	2	0	0	2.6526186001007326	13628.688096313816	0.3622050149178467	26.34576128213613	37627	0	1
c4be0903b4b24b40ad5da9acef26e6ca	0.0499282047884666	0.2136337357189144	1286.100419286714	0	0.0565867276232968	113.23798881185384	4.336132976631748	0.1306824909721184	0.0866520408295065	0.0819601672244269	0.0252456844445828	4.310887292187165	0.0273516369443094	0.2435161044082599	8.674221251746342	1286.100419286714	1	0.0422221796594967	1	0	0	0	0	1	0	0	0	1	1	1	1	0	0	0	1	1	0	1	1	2	0	0	3.071564484169065	4948.23727406861	0.2281555364288366	32.572595708958445	21688	0	1
0381d97f40034fbe9954f73406bfc917	0.07168827530672063	0.7346428754097438	6452.080172461378	0	0.2080072834737615	35.73458415303836	7.81312655564259	0.3058610529145985	0.2749433447008866	0.1283557047338107	0.0329730211364179	7.780153534506172	0.1126410300042584	0.5651216501396709	4.580360715624487	6452.080172461378	1	0.2258114957665577	1	0	0	0	0	1	0	0	0	1	1	1	1	0	0	0	1	1	0	1	1	2	0	0	3.630572136418985	2843.4293421769044	0.140742926405826	41.213892053127466	20203	0	1
4d6f90ece4f04d0e8c29be3160904657	0.1192891531728669	1.4898320775702534	32411.539761323613	0	0.8590913446376095	7.565997812644713	8.583393715348757	0.8765089873392532	0.4586066768373932	0.9651837821906027	0.0259148763927627	8.557478838955994	0.3452471420152752	1.0518841373114098	1.009966727064758	32411.539761323613	1	0.3381922334408858	1	0	0	0	0	1	0	0	0	1	1	1	1	0	0	0	1	1	0	1	1	2	0	0	2.9256207080936667	8467.166934079814	0.2890508631440895	28.64447781246055	29293	0	1
b48a2e1192674090a5445e22fdc06cb2	0.03491755417722736	1.8110795299326896	34103.14994139006	0	1.121706175478267	18.417200211540194	14.50442368809386	0.9390999061810472	0.6062673077373328	0.975118051089611	0.0082151257729002	14.49620856232096	0.4451463340902309	1.2559124303171891	2.282923258745664	34103.14994139006	1	0.6954073988359771	1	0	0	0	0	1	0	0	0	1	1	1	1	0	0	0	1	1	0	1	1	2	0	0	2.2571200990632496	9915.884047916375	0.4586228226222829	21.282664585547217	21621	0	1
b79a5da37a334a20a59faae57f6f9b76	0.0792226454582225	1.420771532593791	620101.3093260023	0.0082258270255261	0.7923257517379823	4718.732581499441	429.1343702893223	0.6625677338693088	0.6024433978028182	0.2896176435077146	0.0314107389907299	429.1029595503316	0.3332158719024167	4.559139281858524	63.45883507764449	620101.3093260023	0.998927688156706	20.34675498942074	1.0083898076403837	11.267683634365524	0.6656595337461086	0.046507848591521	0.0298238228415616	0.1774776218745451	0.0034246936347	0.0087258846083119	0.0298113355097829	0.9995362926364804	0.9994739211172076	0.999932933517102	0.9998682001234808	-0.266824	0.0416429114929633	8.383109030077016e-05	1.00210705815007	0.9988176675121814	0.0095140838713055	0.5258562747924453	0.999408635290063	2.00421411630014	0.0088915305821655	0.0190829178582706	3.6750289843142623	4245.933194784299	0.1423233732706834	40.17909432935375	29801.009720779	0.0294871813209287	1.0359333623839373
3798e54e80124db5b7f527651c841c12	0.10751097924158914	1.6186895364101157	51202.94344144886	0	0.7514499217306094	17.125733725698666	15.382839387069923	0.9647343558296853	0.4575098735015158	1	0.0208944173614827	15.361944969708444	0.3167424331741822	1.1497295234361724	1.5079838387121984	51202.94344144886	1	0.3911655997426507	1	0	0	0	0	1	0	0	0	1	1	1	1	0	0	0	1	1	0	1	1	2	0	0	1.947910623880352	20172.16344391377	0.5207735496040732	19.21612010555384	38735	0	1
41ec07e5230f48bcbb385353bb1808bd	0.07014678230690737	0.8948998621021231	752.567757812045	0	0.2992836496044171	273.04226150899075	24.74774092946762	0.4237170119983067	0.3995861037864795	0.1839064293395368	0.0282222060612151	24.71951872340641	0.1417225563508919	1.431989296586014	15.525066694303078	752.567757812045	1	1.871057239280134	1	0	0	0	0	1	0	0	0	1	1	1	1	0	0	0	1	1	0	1	1	2	0	0	4.175242780205501	25.637602179836517	0.0698572266480559	34.62524779306402	367	0	1
63ea3fa23eed48c5b4e68eb9eee2cb02	0.06252292316168741	1.5138386730537534	18595.25140303666	0	0.8867735051968365	8.566289358523758	7.317825670770892	0.5923405037872956	0.5368917302455398	0.256041227087369	0.027936393916523	7.289889276854369	0.3761984082352307	0.9060207927579554	1.9128778771735409	18595.25140303666	1	0.4700064044827668	1	0	0	0	0	1	0	0	0	1	1	1	1	0	0	0	1	1	0	1	1	2	0	0	3.442085511267162	4100.106343530658	0.1809961746139874	37.83864173606478	22653	0	1
b831e201a13c4866afc255e71657e019	0.052158326635490276	1.6421442178860657	6472.366309045881	0	1.0754022436302293	6.97413719837806	5.936389375794019	0.7224190717272445	0.5962262843870226	0.475207248868397	0.0195297814251353	5.916859594368884	0.451680216799595	1.0330376300514763	1.5433540940739894	6472.366309045881	1	0.5452774299071177	1	0	0	0	0	1	0	0	0	1	1	1	1	0	0	0	1	1	0	1	1	2	0	0	2.6516835244628854	1700.9004122011545	0.2804452452104128	33.27358360819074	6065	0	1
c8dd9b053fae41a1b6b27e9003e55a48	0.05086081754259676	0.4341376629884635	5724.832329654114	0	0.1010855351015324	63.703971577396096	8.74786642601092	0.2108000530046803	0.1997977272823654	0.0854149556616226	0.0253490763531963	8.722517349657723	0.0575816171746539	0.468178458067479	6.390218928133385	5724.832329654114	1	0.1747544062516662	1	0	0	0	0	1	0	0	0	1	1	1	1	0	0	0	1	1	0	1	1	2	0	0	3.253803443946241	5584.414273680986	0.2138147742430885	34.57034270958887	26118	0	1
19fb024f8c2b466fa0b8f17d48985d1a	0.06299773157245998	0.2030631014524731	131846.55787071437	0.0006815076438246	0.0419013434895612	83778.37755765149	322.5660165600382	0.1493620145508945	0.1094997169945224	0.0841158306791462	0.0348437156737646	322.5311728443644	0.0218807821955235	1.014569660472893	266.3627847376481	131846.55787071437	0.9999219302588004	1.0070425845613808	1.0003647676232337	0.4174673577513053	0.034576660358105	0.0030073635200567	0.0028797430136337	0.0251295331671649	0.0003265529827485	0.001396206977503	0.0028796351051556	0.9999449942903992	0.9999409216535956	0.9999902195090002	0.9999841680380394	-0.0373542	0.0035612615836837	5.004348917953445e-05	1.0001664173260534	0.9998300096874446	0.0014812065124527	0.0829074311656253	0.9999150004650492	2.0003328346521068	0.001396206977503	0.0014717766334226	2.7461563004444045	40246.33026770867	0.3142108900021756	33.8708113985815	128077.00028105896	0.0012179024449732	1.001498981161242
45fbda9070af4b8c8cc647c6134678d0	0.05438632235749685	0.4628437581388835	191.662299945534	0	0.1295227753455037	45.56388538098928	4.755299669249531	0.2256442301461601	0.1898767573217639	0.1151695255010664	0.0312937948692297	4.7240058743803015	0.0652448894336008	0.4364850339204254	5.538584795980349	191.662299945534	1	0.1396038662382616	1	0	0	0	0	1	0	0	0	1	1	1	1	0	0	0	1	1	0	1	1	2	0	0	4.076200193905351	77.29025844930418	0.0768292827527874	26.67095241671245	1006	0	1
9b2fa72cf0f049a9aa62437728bf2487	0.05723042675749312	0.7807481908860902	43271.035944799885	0.014167214188496	0.1675977178874589	1519.1418083061712	201.14746104326423	0.4621413717562422	0.5787825942677252	0.0941574923148724	0.0333158579382247	201.114145185326	0.1098393259525395	5.014275724077347	38.06739022692678	43271.035944799885	0.9976777956683024	24.929386389582664	1.0184753491690297	8.171720126535977	1.0124369980583006	0.1272358906505482	0.1230389130915632	0.0177540155570561	0.017066501606336	0.0387370406972617	0.1227358354319807	0.997395196777701	0.9972093692599648	0.9991364954270682	0.9989188923921336	-0.0771492	0.0186837718226649	0.0018174933246444	1.0086741355594373	0.992589741873382	0.0424513273007416	0.0787133708671825	0.9962857133965196	2.017348271118875	0.0387370406972617	0.0625687009355278	3.808937738442904	214.59442184776293	0.1246917035722039	36.22756859669374	1717.003486345148	0.037741391249564	1.0482277745496804
67b8acac8a394f41b7b6bd81bd80cdf9	0.04630021632881237	0.2369797637633365	713.5742703796966	0	0.0560047238122917	131.51870101133477	6.914155937649921	0.13756904392942	0.1097602281157347	0.070834488771779	0.0296132453567013	6.88454269229322	0.0293729928328977	0.297176121726191	8.992733423252831	713.5742703796966	1	0.0693884054765651	1	0	0	0	0	1	0	0	0	1	1	1	1	0	0	0	1	1	0	1	1	2	0	0	3.9614107453179046	826.4081683168317	0.1022782386530732	34.82283379080482	8080	0	1
d613feb6eef24b9eb110f69b9d1a8137	0.043244397954948596	1.4191498893064176	3294.947514131114	0	0.5625715747179449	227.019749023757	24.897142439191583	0.4831808585317081	0.5093987906977324	0.1376383641322984	0.0236437284293555	24.873498710762227	0.2846925460590582	0.9588269889771812	9.382603897790176	3294.947514131114	1	0.6858854527396089	1	0	0	0	0	1	0	0	0	1	1	1	1	0	0	0	1	1	0	1	1	2	0	0	4.113994431628353	296.6997767857143	0.082784535933514	37.66970140106824	3584	0	1
01d3c0a609e648f6b6ff5de4a599faf6	0.06521029447703296	0.3908149320527619	10658.424002294058	0	0.0869822806107504	130.10021896407204	14.917051531929191	0.2182907627442621	0.1912984331326851	0.1009089224914349	0.0352125306743709	14.88183900125482	0.0487286128978876	0.5088413973425885	8.914746954423391	10658.424002294058	1	0.2112687105500863	1	0	0	0	0	1	0	0	0	1	1	1	1	0	0	0	1	1	0	1	1	2	0	0	2.7549821710567546	13115.852763269768	0.3186166103065654	28.70793881274797	41165	0	1
b9f0bf6f17c24da5bfbf73ce2422c77f	0.05921230661873969	1.612690264894388	8233.088044500024	0	0.8818803358967379	19.193362025673743	10.71917826721885	0.5959126749907967	0.5855123251902768	0.1961349300113193	0.020203299857016	10.698974967361831	0.3847418028007646	0.9907818868987784	2.829620133861441	8233.088044500024	1	0.6265368311920168	1	0	0	0	0	1	0	0	0	1	1	1	1	0	0	0	1	1	0	1	1	2	0	0	3.8613617195047527	925.4137355431023	0.1103390646885778	42.54745981722467	8387	0	1
5a9d2f3cb08e40a0a73e23fa1365b530	0.09404061396775726	1.362610719866156	11408561.012370888	0.0009891246257711	0.9429603724832466	84186.01399096001	3359.0000000000027	0.8223698710909215	0.489707911290699	0.910036039679882	0.0468790608838746	3358.953120939119	0.3734641973415309	11.565823531127377	289.2782551470795	11408561.012370888	0.9998827524108196	133.09198174830163	1.0052787270950605	8545.698823477802	63.56314319063464	0.4743969389984581	0.4684678812047279	0.00635703826041	0.0037608416173102	0.00189720869583	0.4684537139484052	0.9999179573823036	0.9999153377447644	0.9999869701214468	0.9999851009397354	-0.107687	0.0118571992114966	6.790651670037924e-05	1.001896430776832	0.9997563730957478	0.0020692202521222	0.2101790670588061	0.9998781775852296	2.003792861553664	0.0019504089853254	0.2357162050507965	2.2075410353193847	39629.15383533054	0.4646618886491397	22.53583831744977	85276.00042210914	0.211321359619841	1.2147245737870225
762e35b0c15a4813a143520a8f391ab9	0.06557840122801807	0.8973615984677024	2015696.535370269	0.0010307067575451	0.1874057220447589	48771.315258808056	1412.3460197534057	0.3179666246136211	0.3209076380311253	0.1061528764052027	0.0540253225638974	1412.291994430842	0.1247015322106204	6.37494018825938	219.9603369691223	2015696.535370269	0.999879034697078	40.53875962951636	1.001851693358215	262.8455840006643	4.675839250598744	0.0833833078062355	0.0822563671175469	0.0040988897233362	0.0015592357393576	0.0012785547413405	0.0822538665535515	0.9999439280428244	0.9999405864335916	0.9999870465393536	0.9999854641151734	-0.0286161	0.0020886833078382	3.367518855356753e-05	1.0007846602424175	0.9998457859402132	0.0013556653389493	0.0544281221883941	0.9999228894023904	2.0015693204848355	0.0012785547413405	0.0414099187309456	3.234713508377832	11062.98395128934	0.2230485282221282	30.970294774433903	49593.00024194036	0.0634272347807715	1.0658481017762456
bf7dc2b9c1084fb8acd6eddc143a0e5f	0.06756119643598908	0.2635459701334674	4183.467812427436	0	0.0550854614330064	1430.0400635856463	22.476859351056103	0.1544623307764529	0.1035705576196886	0.0915940025736741	0.0588328914126564	22.41802645964345	0.0300526047382563	0.2912231294250472	20.841915481031386	4183.467812427436	1	0.0609522994832234	1	0	0	0	0	1	0	0	0	1	1	1	1	0	0	0	1	1	0	1	1	2	0	0	3.04846004221172	12995.585277839722	0.2634578481934786	28.552014680208373	49327	0	1
6886a7a378e64de4b12203700e49b89d	0.09294975024733566	1.0593844039727482	39449.78794441775	0.001613477991081	0.3993980301272627	10500.92734461726	116.96575840100397	0.4010361793395671	0.330685934086638	0.1896712554302236	0.0682134414808131	116.89754495952316	0.1970488382181104	0.8892686771201374	80.94761437168556	39449.78794441775	0.9997995574238332	0.6299687629677215	1.0001615518191636	0.0064300958336468	0.0016311705999623	0.0004520169527289	0.0004248771378505	0.1845882706426672	0.0001513624324288	0.0012246238823371	0.0004248463045415	0.9999533825431738	0.9999488295248452	0.9999885011117188	0.9999799772805124	-0.0276688	0.002016428407084	4.8096312099618144e-05	1.0000773794473368	0.9998466721889484	0.0013012926946819	0.0384971063832408	0.9999233311876544	2.000154758894673	0.0012246238823371	0.0002192235226448	3.757747353793505	6874.624744417271	0.1378066941510097	52.97999057463734	49876.00072164535	0.0004610186484777	1.000821873872429
c39f4ea6638445718e8adb47ba66fa65	0.08215238264673641	0.5073966243692702	27644.409901416424	0.0003447466844841	0.1130150592369006	30721.42714462135	140.14866517810202	0.2388142819686509	0.1881328661801349	0.1200082678891585	0.0662811895953236	140.0823839885067	0.0654714493184862	0.7479604883712082	156.0599169854214	27644.409901416424	0.9999595264595936	0.5024126308922943	1.0000185259955487	0.0023155260507523	0.0004631163791186	9.262774373472872e-05	9.26299777441802e-05	0.8461519935319509	1.852599554883604e-05	6.218525967770772e-05	9.262774373472872e-05	0.9999969123340752	0.9999964373085484	0.9999984814757746	0.9999983158185864	0	3.1469235034745296e-06	0	1.0000092629977744	0.999992589735821	6.589045878742566e-05	1.8526218952005632e-06	0.9999962948008904	2.0000185259955487	6.218525967770772e-05	4.6314430369727226e-05	4.168621967849305	3930.441899056948	0.0795410591949032	42.14198480338595	49412.00004047436	0.0005059192550796	1.000708301291132
e2adb3a2565242e991c113aa38750a18	0.07007466032358962	1.3817208050254022	32063.8240967556	0	0.911685625816598	4.612046933420251	7.634951685470863	0.5594278365962795	0.4845281330053755	0.2750868296985609	0.0659307964854785	7.569020888985385	0.373712188091807	0.8018485142840536	1.2231930564608573	32063.8240967556	1	0.3300015355007504	1	0	0	0	0	1	0	0	0	1	1	1	1	0	0	0	1	1	0	1	1	2	0	0	2.622283470568008	18368.495197417236	0.3683349414950617	25.590186960795197	49869	0	1
7d4a464354e24b5b949b6a79534f5854	0.0978813460416917	0.4731946196064395	9847.472647767525	0.0003745957477387	0.0967740070655325	2032.6384052658595	38.75759995028669	0.2494308082606102	0.184345599034785	0.1353364520429694	0.0625649661633611	38.695034984123325	0.0556636581700031	0.4671368846590516	24.25146619760226	9847.472647767525	0.9999556816167564	0.1560011408994227	1.0000581145103766	5.8100834996495134e-05	5.810425333315032e-05	5.811109122649415e-05	5.811451037651718e-05	-2.90581e-05	5.811451037651718e-05	0.0009010164054307	5.811109122649415e-05	0.999970942744812	0.999970942744812	0.9999883770979248	0.9999806284965412	-2.54032e-06	4.935863942394412e-05	5.811451037651718e-05	1.0000290572551884	0.999883776107972	0.0009591309158068	2.90581100009692e-05	0.9999418854896234	2.000058114510377	0.0009010164054307	2.905640040075283e-05	3.358763286838579	8375.081503312873	0.185589148476807	35.79359679099078	45125.00004431936	2.215919162180793e-05	1.00006647904802
9da41d42e6d14a119845605aa8812d20	0.04656554685090802	0.3817416889680169	9.79846683762084	0	0.1996821327640055	14.424704630736256	1.3729542701956394	0.203651401303398	0.1314991089368906	0.150165560291804	0.0270918437979826	1.3458624263976569	0.0801768024931294	0.2788648594254708	2.7606139065120203	9.79846683762084	1	0.0362917165695499	1	0	0	0	0	1	0	0	0	1	1	1	1	0	0	0	1	1	0	1	1	2	0	0	3.683188287696817	12.587301587301589	0.099899218946838	20.34467120181406	126	0	1
b14bd72eb2d7475c8f5e5d82b5b4622c	0.10065792605032792	1.3508013409392303	14823551.244870722	0.0100509004360673	0.7228584911227989	12401.790373939371	3500.9999999999977	0.946619615618706	1.0409251308411918	0.253357322623886	0.0606975039446007	3500.939302496053	0.312949697817549	28.762010785146124	105.42796432106552	14823551.244870722	0.998661150303948	826.3571757081878	1.2155107881025755	76258.53419272977	533.6990589025506	4.15230431154488	3.47571412584097	0.0924004891939225	0.0409895595524247	0.0210661461077159	3.473980240302817	0.9987794632619408	0.9987057536883348	0.9998982715678578	0.9998063739483743	-0.2617	0.0794424974408858	0.0003681561954701	1.0229144550216185	0.9969900744496768	0.022782757669245	0.5950587235708302	0.9984938046877894	2.045828910043236	0.0212416585422696	1.9070046093464623	3.862566323569695	2039.986773815503	0.1138449005979967	42.20154404351986	17895.009152296447	1.3137694757710423	2.345945644288186
1c860a1ab3394f7fb12625416f6a30c1	0.0890348646707156	1.5500302905637062	8222.12359140306	0	0.9519798584993449	6.40558558844285	6.198563018798253	0.7028764661702558	0.5203796419123773	0.489223795767487	0.0335778736720548	6.164985145126198	0.3906119081816525	0.949707443891194	1.4009358049743597	8222.12359140306	1	0.4079089022863584	1	0	0	0	0	1	0	0	0	1	1	1	1	0	0	0	1	1	0	1	1	2	0	0	3.321677547237804	1776.73519087319	0.194902938884729	33.953574628102785	9116	0	1
22a0e585e3d34721a755e80aa8daf66b	0.15535732322466722	0.675152588092971	20553.386050891942	0	0.1774431610702919	22.008043673315207	5.913881383296431	0.3449083389479492	0.1998582670564682	0.2261535492172306	0.0892251743586755	5.824656208937755	0.0901859493875216	0.473029172289346	3.613371994875388	20553.386050891942	1	0.1047948355609104	1	0	0	0	0	1	0	0	0	1	1	1	1	0	0	0	1	1	0	1	1	2	0	0	2.65665185276104	31886.51628636126	0.3471359114958333	28.923278684181152	91856	0	1
876ea9feb54e403a93ea87edbd0e4c2e	0.08165240109577307	1.792216088231666	2250.015779126521	0	0.8431263688935416	22.046256186454805	10.958049594500872	0.7110653170107301	0.5841565780022866	0.406081303222008	0.0394676378165284	10.918581956684344	0.3764895158127063	1.070613294733525	2.881174369892812	2250.015779126521	1	0.6405989418046037	1	0	0	0	0	1	0	0	0	1	1	1	1	0	0	0	1	1	0	1	1	2	0	0	4.40109995399233	105.0886398369842	0.0535347120921977	35.66739961835994	1963	0	1
0ff14b8680c94103a788b398449593d7	0.05821716399518452	0.692540340415023	1101.1714538020951	0	0.1892237936146052	35.21824172453877	6.4365184289452095	0.2979848502010112	0.286776805423466	0.115601037533519	0.0331639964354429	6.403354432509767	0.1035753889129095	0.5975445470160723	4.7358781824052	1101.1714538020951	1	0.268264514719324	1	0	0	0	0	1	0	0	0	1	1	1	1	0	0	0	1	1	0	1	1	2	0	0	3.640632312156935	468.8132295719845	0.1520146658793723	20.94666333580624	3084	0	1
2a5f22ac25bd4f9f97da5fc5ff5e1ac0	0.07005987486014055	1.2494197245927634	55516.06278711266	0.0011826813407229	0.3872892049368501	5550.652421019462	111.58107472780571	0.4305520604352734	0.4329483846632366	0.1400682826769126	0.0245800009960376	111.55649472680967	0.2346669084917365	0.9905008019900956	51.65128059399446	55516.06278711266	0.9998586291448192	0.7957167619979634	1.00034995928755	0.0147294807245162	0.0038740641004981	0.0010762823528514	0.001047419424974	0.0139314160997689	0.0003390916320473	0.0022967271715988	0.0010473041559449	0.999905863596027	0.9998951074046502	0.9999720545177808	0.999957025671635	-0.0200722	0.0020244978471256	7.859732312229606e-05	1.0001713570919408	0.9997065172322708	0.0024471039647215	0.0314726289564586	0.9998532457587104	2.0003427141838817	0.002300349723433	0.0005309254444563	3.211171502150588	12380.472201604638	0.2187903757396641	39.15065992343434	56578.00038878874	0.0004771245281611	1.0007952497084085
475e8c302ee441779256676fd699f0e1	0.05262992508859938	5.042213675818165	323249.62751337874	0.2183146691725334	0.9518280919539156	110.70838903260764	197.5372919985108	2.805171022765987	4.122981843184322	0.1667280754602629	0.0294827010956632	197.50780929741515	0.6936648499376245	11.663954004861145	9.113926346538376	323249.62751337874	0.9503717732884398	128.1788385605503	1.1487141428731138	11.365078156005536	2.005976406393082	0.4417665040323507	0.4083765385997221	0.0421920901465088	0.1265259220741956	0.4576746747532887	0.3920412236824732	0.9620685076885264	0.9584151772384192	0.995203010886703	0.9883717740210826	-0.0340371	0.1231342954057573	0.0394047097260998	1.0678507009179634	0.8762133690654933	0.5485238872099466	0.1438703320500266	0.9356596261589698	2.135701401835927	0.4732416206092348	0.2125357606580182	4.461258770657047	138.5942760942761	0.0583309242821027	36.577897380085936	2258.083333333333	0.1553198582344205	1.257996632996633
568376663b8c47599d701bf778936ed1	0.05882707402968563	0.2998998588005727	4777.701112974481	0	0.0669680031014999	367.4389057675696	18.06184359417648	0.1855064864326546	0.1607657661599619	0.0876323060713728	0.0354881101949121	18.02635548398157	0.0365132970670713	0.4841806162323684	14.245480400879217	4777.701112974481	1	0.2000182126265674	1	0	0	0	0	1	0	0	0	1	1	1	1	0	0	0	1	1	0	1	1	2	0	0	3.32624296388688	3593.8263002944063	0.1763408390723457	42.11586210383479	20380	0	1
3b541fc2973d44b397fed5fd0b59fbff	0.05701299587878429	0.3278860114906939	159117.98669592294	0.0013474985856919	0.070099080996622	26347.90726618909	282.0436952285577	0.2125304890688111	0.2042100973446872	0.0895778082893209	0.0227631001986347	282.02093212835905	0.0390302518949362	1.456513552001432	146.89842764447593	159117.98669592294	0.999840019198151	2.07626	1.0003098281231853	0.198731930025817	0.0192919935896559	0.0019985172306467	0.0018355958529343	0.0499800163213167	0.0002604862989518	0.0013526972963187	0.0018355118027382	0.999948527874598	0.999944792982438	0.9999919538256976	0.9999856325233474	-0.0427572	0.0033672198854183	5.107824728790334e-05	1.000134537816226	0.9998360606358204	0.0014346713192385	0.1088202462358185	0.9999180259770792	2.0002690756324517	0.0013526972963187	0.0009585282708952	2.012456211589097	38499.80239984001	0.5132964788992735	20.21754231890173	74993.00063995733	0.0025597269583623	1.003199786680888
b3c4add9dade41e2a36a17561adcfe86	0.0046526206127030685	2.8192293162643463	262.2456936296228	0	1.1218754494266767	5.155145742606603	5.830988559942742	0.9465138527221048	1.128107011682283	0.1530871796934609	0.0018259894834561	5.829162570459285	0.6678938035916259	1.7564861099553708	1.7649230917892391	262.2456936296228	1	2.189354981071308	1	0	0	0	0	1	0	0	0	1	1	1	1	0	0	0	1	1	0	1	1	2	0	0	3.516184990806977	9.329411764705885	0.109757785467128	15.683598615916956	85	0	1
ee660b9a5f134ba08da92cbc4606d663	0.05012938177063889	0.9837675269022744	101.9128081074107	0	0.2887209031576353	12.812800217772695	3.642310086348741	0.3611401621624834	0.3325526980688124	0.1689524277931285	0.0241524192127207	3.61815766713602	0.1458811219915252	0.6346789923649981	2.909059160109691	101.9128081074107	1	0.2723952066227046	1	0	0	0	0	1	0	0	0	1	1	1	1	0	0	0	1	1	0	1	1	2	0	0	4.0304808308365	17.8300395256917	0.0704744645284256	18.705713259072944	253	0	1
066d05fe4822416291f5517ae6701673	0.06326289617497904	0.8958741964652097	17523.51231272703	0	0.2622659833643332	32.84819102919859	10.788776216350046	0.3445208768308361	0.3256963891445962	0.1338515098136686	0.0299868966551254	10.75878931969492	0.1425828349250901	0.6389331584449529	4.217633361518873	17523.51231272703	1	0.2895409463881552	1	0	0	0	0	1	0	0	0	1	1	1	1	0	0	0	1	1	0	1	1	2	0	0	2.6627644506300863	15264.660104834013	0.3556123495593247	26.767789493465088	42925	0	1
da6e33a38a7146ad9313097afc10bbb0	0.05044446449481862	1.2696721260278443	318.5828136061237	0	0.4845706342484195	9.205281774318054	3.77188733053938	0.4585168228712132	0.4374093875141808	0.1910098225299177	0.021204919858267	3.750682410681113	0.2284869982865616	0.779732305803714	2.4078840941868087	318.5828136061237	1	0.3977447918580649	1	0	0	0	0	1	0	0	0	1	1	1	1	0	0	0	1	1	0	1	1	2	0	0	4.071010394074706	37.725190839694655	0.0719946390070508	22.50626420371773	524	0	1
e2a7c0d4cbd1475e9e9acfe16d74807e	0.09565481942493202	1.3491781810435357	15409.85378338875	0	0.9019751947425324	7.490651778377066	7.08684893285514	0.6496538784486326	0.462925275774385	0.4853809474161831	0.0342151886761438	7.052633744178996	0.3662977055936807	0.8529145552784866	1.3067182709060698	15409.85378338875	1	0.3054130768225476	1	0	0	0	0	1	0	0	0	1	1	1	1	0	0	0	1	1	0	1	1	2	0	0	2.9471117673550298	6303.226124722655	0.2975605969278504	31.890146460743537	21183	0	1
0229184746784cfaa01ac041ad1ad23e	0.00508797071233657	2.156920328003431	388.6987546324042	0	0.7684081902062108	18.630044898695125	9.564171453281004	0.6712448649486074	0.8223829851550939	0.0906330006857075	0.001420360869662	9.56275109241134	0.4084876987091554	1.4340875731165157	3.410366546505048	388.6987546324042	1	1.6060374986473436	1	0	0	0	0	1	0	0	0	1	1	1	1	0	0	0	1	1	0	1	1	2	0	0	4.046991949161612	14.894179894179894	0.0788051846252904	24.96637832087568	189	0	1
18765c3429f440d3b79f85d1cc3fe47a	0.08740246786043952	1.697620335807586	37261.33174907083	0	0.7158868947490469	77.71428126295505	24.35588748249925	1.025124895973224	0.4759021721289017	1.060976716130484	0.0122231208775759	24.343664361621677	0.3234186266613363	1.2291787390775966	3.3126328625350423	37261.33174907083	1	0.459999320256277	1	0	0	0	0	1	0	0	0	1	1	1	1	0	0	0	1	1	0	1	1	2	0	0	2.177017107359098	11454.07979888087	0.4644424539324008	19.86889354074384	24662	0	1
8e6bfb42253a480f8427c2a9dc9f95a6	0.05352845432105451	1.2439914973794317	24375.756324814545	0.0003425770446005	0.445724084628773	89.04825429030596	25.41099380420534	0.4022720118892333	0.4168962890587619	0.1126745624285087	0.0337981934042581	25.37719561080108	0.2531806613665868	0.6999327590046597	4.09461841230343	24375.756324814545	0.9999598046506182	0.3280830955784634	1.0000142204406128	1.4219122685582854e-05	1.4219452148207303e-05	1.422011111938396e-05	1.4220440612627094e-05	0.3846082743127042	1.4220440612627094e-05	0.0002395002166607	1.422011111938396e-05	0.999992889779694	0.999992889779694	0.9999971559118777	0.999995259853129	0	1.2077789456230258e-05	1.4220440612627094e-05	1.000007110220306	0.9999715596130146	0.0002537206572731	7.110302680423607e-06	0.9999857795593872	2.000014220440612	0.0002395002166607	7.110137933002762e-06	2.8667377205221074	15155.920170431707	0.3046048751996082	26.094471248812297	49754.00004019616	2.0097674690919213e-05	1.000060294235871
f9e619f3a9be40b0b2177e1c48e0d415	0.05027424024836523	1.032388819771021	893.7077147777342	0	0.2994238263542701	22.189379325837766	6.073988548600648	0.3805779261379318	0.3966117806056644	0.1175572995938085	0.0219643381222688	6.052024210478379	0.1684382790044151	0.7559261670708919	3.8007265013679623	893.7077147777342	1	0.4265848121990407	1	0	0	0	0	1	0	0	0	1	1	1	1	0	0	0	1	1	0	1	1	2	0	0	3.7799881392164414	179.36700767263426	0.114684787514472	34.22562646764477	1564	0	1
6a0fa7e6c21e4509aa1fe6de2ec5ea09	0.028448306821192995	0.7988828257256153	92.27976393463436	0	0.2312910209897375	24.329440778322443	4.412435593328773	0.2882047645578755	0.3076276169685286	0.0868432039389118	0.0182969175572279	4.394138675771545	0.1233704446533155	0.601565812853959	4.066383648886773	92.27976393463436	1	0.278819440880784	1	0	0	0	0	1	0	0	0	1	1	1	1	0	0	0	1	1	0	1	1	2	0	0	3.426305801629478	27.29019607843137	0.1070203767781622	7.5035140330642065	255	0	1
be6d3458c8e347d0a8d489cd571855bc	0.04768917918872542	1.6094105916134014	5841.748770398901	0	0.789355729634802	24.628321862646573	13.698332483795884	0.5563307061410312	0.5922083687696196	0.1339998978245292	0.0244036433861956	13.673928840409689	0.3618262231705661	0.998526715569788	3.231612085836599	5841.748770398901	1	0.6875517471112099	1	0	0	0	0	1	0	0	0	1	1	1	1	0	0	0	1	1	0	1	1	2	0	0	3.284755042901596	1219.4464925755249	0.2081321885262886	34.721195986434466	5859	0	1
fd2c6d9f98404b5281f38de31a6028a5	0.0460748249149536	0.7266339128280236	18115.90881699274	0	0.1296790068407289	72.48376468819374	16.94821355968749	0.286264837120769	0.3232945210480979	0.0769921332638197	0.0168134283238059	16.93140013136368	0.0918272949077969	0.6856053658030039	6.1259025233856	18115.90881699274	1	0.3881071606460904	1	0	0	0	0	1	0	0	0	1	1	1	1	0	0	0	1	1	0	1	1	2	0	0	2.6396043633087904	13403.650856253244	0.3477854399650556	26.25635661424021	38540	0	1
39b76bc6501a415dbca99246c3c9b9cf	0.0646261864625793	1.4258744462027813	1800.5526168328183	0	0.5582497217697489	31.807434328813443	10.044944159208145	0.5450490577482947	0.5099660747745426	0.231544510368165	0.0305112305329419	10.0144329286752	0.2682591480147157	0.9802077124071968	4.210023725851608	1800.5526168328183	1	0.6637286841102455	1	0	0	0	0	1	0	0	0	1	1	1	1	0	0	0	1	1	0	1	1	2	0	0	4.3672022300702285	105.35112059765208	0.0562172468504013	31.77138372767148	1874	0	1
698fe2620f51438abda92047a1895853	0.05471436353157934	0.2119073994310336	1741.9533154981086	0	0.0468761554730576	172.3122052936455	8.942760108669987	0.1491965595051579	0.116991869428772	0.0814669517205551	0.031319643582334	8.911440465087653	0.0233531646786191	0.3636021669140829	10.611212863946896	1741.9533154981086	1	0.1099469224164404	1	0	0	0	0	1	0	0	0	1	1	1	1	0	0	0	1	1	0	1	1	2	0	0	2.886970408896508	3393.8060109289618	0.2575748338592108	30.36975067177024	13176	0	1
7492039006b54e7fb307c545836e5764	0.05322664638933888	0.9545946453454396	9210.65149624756	0	0.1206406461027803	88.54488205089787	18.73205638489986	0.3084665751642051	0.3445759341795334	0.0901441188605143	0.027919215788502	18.70413716911136	0.105378906922436	0.7069782829844592	6.452506338751816	9210.65149624756	1	0.4046666646181198	1	0	0	0	0	1	0	0	0	1	1	1	1	0	0	0	1	1	0	1	1	2	0	0	2.9313300566796627	5010.370631647493	0.2718890075780059	29.394482349105974	18428	0	1
0800407ca44543ccb326a3644e17fe4c	0.042905268767251065	0.3237392212421802	12155975.497726642	0.0047082428472935	0.0672448540494169	14761.80230605854	2385.9999999999995	0.36607542554778	0.5099387919902748	0.065973956343858	0.0355144129005911	2385.964485587099	0.0400564140564963	15.644630702349062	113.22825594842251	12155975.497726642	0.999436321609384	244.62045859569284	1.0182273517020222	1434.4299097098408	17.775483385166098	0.2624180701740735	0.2106957174251082	0.1443111023549727	0.0046156837962992	0.003531638857675	0.2106674146052945	0.9998213809346536	0.9998125734713992	0.9999842865232532	0.9999660491090002	-0.204859	0.0185652433516612	5.04251447492081e-05	1.0026438401538476	0.999572864662568	0.0037485494579436	0.346221451971204	0.9997864051210558	2.005287680307695	0.0035349545790019	0.1182784468997954	2.9376961617849524	14176.19908992067	0.285430658597847	25.969471760969853	49638.00434905166	0.3874350037706638	1.4021060685378328
541d1d403f5443a998470d7085f13aaa	0.06418142463898718	1.4827685794485637	933578.7943473076	0.0034522751922256	0.8689560819594406	18494.167500090505	671.4571195995654	0.5936884078564677	0.6007555640173927	0.1658473333978659	0.0291093065794323	671.428010292986	0.3695760487873624	4.159368958775835	129.80609867742746	933578.7943473076	0.9995553188143864	16.947884209604826	1.0029238542166017	18.35954215520872	0.6168890868218125	0.0234314825934178	0.0168779273945617	0.1627177852335579	0.001130223811935	0.0044125516489986	0.0168764595179813	0.9998184502042744	0.9998113475254622	0.9999856515367624	0.999971320094752	-0.112127	0.0162224957629344	0.0002365041013947	1.0006425071078886	0.9993801856100516	0.0047609322733375	0.3384484453073681	0.9996900303386588	2.001285014215777	0.0044527125739362	0.0100773524969949	2.9511411825519134	14457.982599188334	0.267923996056341	30.02309405082693	53939.00366918073	0.0251634075884837	1.0279821359079369
611ef04ea689496694ac9aedcd4251af	0.05508696874754242	1.1102066745299175	2280.711441203312	0.0041885970760116	0.224418685376039	632.025777053928	29.2507497064117	0.3662981139711589	0.3781747210192033	0.1317619267526564	0.0310194454738059	29.219730260937894	0.1499069769605085	0.8556696834222122	18.178232606264785	2280.711441203312	0.9993581515423996	0.5979962988290408	1.0008056382377255	0.0008020352039612	0.0008029333080853	0.0008047358859163	0.0008056382377258	0.2303661859294727	0.0008056382377258	0.0090945309383327	0.0008047358859163	0.999597180881137	0.999597180881137	0.9998388723524548	0.999731453920758	-4.73593e-05	0.0006844376555187	0.0008056382377258	1.000402819118863	0.9983900770522628	0.0099001691760583	0.000403044839758	0.9991943617622744	2.000805638237726	0.0090945309383327	0.0004025935309105	4.394804176237877	176.07158908507222	0.0565237846180007	42.16980601810223	3113.0006420545747	0.0003209242288002	1.0009630818619584
16bf38d076e84524bc50f243e971124a	0.11368281406724948	0.336042827700589	1461.9795859962217	0	0.0859293095882237	209.2884401608977	8.855452114718398	0.2204093618179564	0.1097243174709962	0.158490785562425	0.0721301964945311	8.783321918223868	0.0404145646035278	0.3492185358083157	11.117765660818614	1461.9795859962217	1	0.0733732989751051	1	0	0	0	0	1	0	0	0	1	1	1	1	0	0	0	1	1	0	1	1	2	0	0	3.4695952169689948	1930.1383049716385	0.1610058646122487	37.504614780501775	11988	0	1
c7236592cc7c4c7c99288e9ff14bfebe	0.12291162211330516	1.553743923637552	52639.2201718458	0.0040590031133241	0.6575514921834398	5265.185864096934	207.3458684717595	0.6925939270517083	0.5841281016496609	0.3436210906069683	0.0659745428752652	207.27989392888423	0.3022317438936099	2.741262680029072	68.01745070152569	52639.2201718458	0.9994291015747392	7.034834733131264	1.0042738462512428	1.926068548925016	0.2395218399736945	0.0301511108839044	0.0295568314066623	0.0091789172214081	0.0040819702798707	0.0109877903471564	0.0295374332323871	0.9993798813051628	0.9993356974073826	0.9997931675862536	0.9997419513753616	-0.0299042	0.0062381819077225	0.0004307914776012	1.0020601727370726	0.9982346804190532	0.0118710122883247	0.0388745816644937	0.9991167780588311	2.004120345474145	0.0109877903471564	0.0149269855726417	4.489721714326703	341.74461099214847	0.0487858117048034	35.20707772209205	7001.000856531049	0.0092774356646445	1.0118486795146324
d91ade31fba945458ea603014ef70b75	0.11267322960620872	0.9779458737733674	47472.55824463154	0.005577104379957	0.18836985884563	2267.868217265212	91.66799821459492	0.4047343931532084	0.3659421146917753	0.1732785254276662	0.0618428312205758	91.60615538337436	0.1194537331106954	1.363227581878171	40.25918104865164	47472.55824463154	0.9992172793983696	1.6945795109923096	1.0014889345569515	0.0265242402886391	0.0083523623211114	0.0030663880233994	0.0025335730527806	0.0934330571729156	0.0012421160347404	0.0097428677430094	0.0025319878447936	0.9995602343511734	0.9995080876844338	0.9998823841219712	0.9997907453068572	-0.0666251	0.0152860904025735	0.000432734450922	1.0006776345319592	0.9985038069075464	0.0108000255529223	0.1364495798284919	0.9992515696311652	2.0013552690639185	0.0100311554407904	0.001399990269045	3.689062324103295	3387.1253474261107	0.1325944547827798	35.22206497838221	25525.00540223136	0.001369688261164	1.0027011156782148
e66dd2965a504f09b056dbb9bf41b8e4	0.1072786609068018	2.8843377602524862	20005392.155152567	0.1795160800396577	0.5185475865646212	2957.273515242309	3681.999999999998	3.866695238569506	6.248412508659194	0.1848552415786999	0.0630966100766027	3681.9369033899216	0.3967849662213506	56.86348548158159	49.11981077210588	20005392.155152567	0.9654639601186754	3218.504649046064	1.4146826064180866	218913.548883622	1605.6215217014849	14.282246562742118	13.861216192591163	0.0143170243221454	0.2776622521367299	0.3786340195166274	13.783260459131824	0.971667437204042	0.9690458946753668	0.999597775959955	0.9985007469428412	-0.0507955	0.1281550006733985	0.0199895496182541	1.1442232162490296	0.9178340487710944	0.4331443115130832	0.2321831091931409	0.9579321584702176	2.28844643249806	0.3843681079194537	7.03586568883332	4.259042163438716	450.0353967997414	0.0727388713107712	35.25420300635579	5973.325521254243	5.064032158232892	6.28947793761112
54e66b5077074d709a4bafe27ee0dfb8	0.04639944182046413	1.506241881403492	4995.649936667818	0	1.0702765119097355	5.24736692825752	5.97946475265623	0.6737821451940699	0.5624237349323036	0.4526692045010231	0.0191974544514269	5.960267298204803	0.4508927488049707	0.9445843923900156	1.1531243432899172	4995.649936667818	1	0.4382572951644925	1	0	0	0	0	1	0	0	0	1	1	1	1	0	0	0	1	1	0	1	1	2	0	0	3.09976983481298	1412.7413823897125	0.252320304052458	31.34422984789753	5599	0	1
9919e7ee10bc4564919bb98cb6eaaee4	0.040377690996815215	0.359137255164343	478.0954731115045	0	0.0845032360868455	107.88464915449828	8.13289441344977	0.1773610164477461	0.1738262827334415	0.0675592512439963	0.0213078009088538	8.111586612540917	0.046383377557705	0.4226035395370593	7.948913804830353	478.0954731115045	1	0.1471368214738731	1	0	0	0	0	1	0	0	0	1	1	1	1	0	0	0	1	1	0	1	1	2	0	0	4.0122417615464485	252.36794919686216	0.0942726743357721	42.823647923504495	2677	0	1
1ce33c8132bf4c3290f26222c930eed5	0.049627543313514995	0.301918309398187	606422.4292866806	0.0018810970197136	0.0565427236279581	42893.23685455564	560.5110890850871	0.1795616046518008	0.1751061433051714	0.072181188014831	0.0217928222557904	560.4892962628313	0.0349433348137726	2.5146282820801567	201.48435686121573	606422.4292866806	0.9997706169848288	6.291113027172271	1.0016684723103546	12.00652375285084	0.500462219146524	0.0224674290090941	0.0207542246244338	0.0393223592933496	0.0011866248605992	0.0031841220660033	0.0207527950524556	0.9998675270218512	0.9998589505521226	0.9999783735481904	0.99996915065405	-0.0575252	0.0094834562323812	0.0001217533149429	1.000619893220487	0.9995859230602432	0.0034459301106414	0.1564223021671649	0.9997929363333083	2.0012397864409746	0.0032316907224603	0.010805413408382	2.5372902562104964	35678.56138558112	0.3720314632185055	25.82500837306501	95880.00171007904	0.0094572423659942	1.0106045755041606
fb3f9616a96a4232a880897f2ccc117a	0.051807592629644704	1.2902985040652353	59350.81250693281	0.0320093173876166	0.4293118127056345	644.997323589891	172.9055674767561	0.690941040339593	0.8598452054886433	0.1123220041281314	0.0348623650342169	172.87070511172186	0.2372990058073407	5.65032774339839	24.16672780283153	59350.81250693281	0.994630023429626	31.44880408659198	1.0116383435686849	1.2016391860328115	0.1914975713866186	0.0372957800143771	0.02993418748417	0.0820504149170438	0.0090281932203417	0.0430333999690144	0.0298148958154602	0.9974784849462288	0.997209102429193	0.9995520836318296	0.9991000985324708	-0.0782337	0.0367499054322233	0.0022848072654811	1.0048813664631455	0.992010529673542	0.0471902872146513	0.1485143308324278	0.995994480199536	2.0097627329262915	0.0431847674141882	0.0168074918746368	4.043234511526224	172.43625605164067	0.0927575341859282	35.44965234624688	1849.0172135556752	0.0338240813268743	1.0500268961807424
1df3679ca34e42adb62612c7ae0471f6	0.06466766991559657	1.2353834913234791	6311.530010465931	0	0.5732850232499799	11.334538851739453	7.252212847198934	0.4471929984311822	0.4112457854716587	0.1820140645971082	0.0290176677175823	7.223195179481352	0.2674589066396793	0.7008349667503162	2.200001249695786	6311.530010465931	1	0.2911880727740453	1	0	0	0	0	1	0	0	0	1	1	1	1	0	0	0	1	1	0	1	1	2	0	0	3.922246398028791	1331.582412451362	0.103625090463141	45.29364819452225	12850	0	1
29781923bfc047c7b363454d1d3acad7	0.03698251756198947	0.4623774065600439	87.9644101442324	0	0.1373936455037865	36.1720964684252	3.885679440289191	0.2121060282171416	0.203523891192715	0.0867645287110401	0.0207238285385705	3.864955611750621	0.0707029625972089	0.448142819456775	5.11082476734314	87.9644101442324	1	0.1558430194246167	1	0	0	0	0	1	0	0	0	1	1	1	1	0	0	0	1	1	0	1	1	2	0	0	2.5850718597476328	100.50228310502284	0.2294572673630658	14.932987218781928	438	0	1
9cadd1c31a5b408fbd4dcd47166cc1f8	0.05185311980152421	0.2591580255775794	2478.9270411184766	0	0.0635742846222163	79.62877797736509	6.392393496030416	0.1503830981726477	0.1136022611229019	0.0832341012863631	0.0269016103983646	6.365491885632052	0.032834160917601	0.2971474379188629	7.2435314112627	2478.9270411184766	1	0.0656815236457402	1	0	0	0	0	1	0	0	0	1	1	1	1	0	0	0	1	1	0	1	1	2	0	0	3.6762276152087097	3742.97357079252	0.1333205189952812	41.20742864021048	28075	0	1
a185dbf6970b4c0b91c2b205abad5f43	0.1082769361434406	1.545754844791538	74041.13015463394	0	0.816933027565208	4.0964533735587	6.608149148513259	0.9317825122299598	0.4409131297167479	1.0130852412552558	0.0146235805568915	6.593525567956367	0.3276781152547167	1.0838514336529463	0.2858090986490785	74041.13015463394	1	0.3065152801339717	1	0	0	0	0	1	0	0	0	1	1	1	1	0	0	0	1	1	0	1	1	2	0	0	1.966675311222836	32558.77181570096	0.5165763123643612	18.021952052393235	63028	0	1
0d5c33a23ed44513bf683deab731c63a	0.05786894178558809	1.105040505675524	7964906.588369861	0.0043908572577988	0.1854540899224235	42535.12359133461	2688.0000000000005	0.4383707306630864	0.5236208251516339	0.0999424054268612	0.0276017455027729	2687.972398254498	0.1546564861749245	12.448627112685063	199.76567974625505	7964906.588369861	0.9994553089456998	154.7761480931756	1.0124093730596802	4187.721168123215	38.62417193068063	0.3807899368390934	0.3523217356760006	0.0426034852300228	0.0050940961705081	0.005841797424343	0.3522946574785704	0.99972984988013	0.9997070760948692	0.99998321086539	0.9999690853387284	-0.103533	0.0215652453943432	0.0001585554505793	1.002642538231225	0.9992437367094578	0.006243876424212	0.3487541667013397	0.9996217879390166	2.00528507646245	0.0058569806816414	0.1832779181287735	2.4897345893651925	18888.544020078996	0.3675028507515807	24.63717917164602	51369.00451388213	0.2441069048632446	1.2511625192131837
315c85b3ff764e4a90f13577e26f1a48	0.061370848465685815	0.4010671347933813	4957.460697269526	0	0.0979517684902107	108.65164495069948	9.744683498481768	0.209600312756034	0.1778135159511113	0.1002364384725808	0.0296180492784172	9.715065449203353	0.0534246587165215	0.4502602062742945	8.187059379045023	4957.460697269526	1	0.158801962246743	1	0	0	0	0	1	0	0	0	1	1	1	1	0	0	0	1	1	0	1	1	2	0	0	3.004008931098951	5997.678607941766	0.2452737336090363	29.85239730955142	24453	0	1
bc7a66716bfa438c8ebaade2fc08eeb9	0.056718166718898774	1.8223138224310569	2091.819858987779	0	0.9636278274997024	7.640477455989184	5.936790824026617	0.7008593673747001	0.6215293835304134	0.3543681060383447	0.0256993067534437	5.9110915172731735	0.4216855460594603	1.0714895863155902	1.8879878910770072	2091.819858987779	1	0.65688608074589	1	0	0	0	0	1	0	0	0	1	1	1	1	0	0	0	1	1	0	1	1	2	0	0	4.189023042809871	125.86169045005488	0.0690788641328512	30.95484509971431	1822	0	1
24168c23b95e46018577b512d8143a2d	0.047566784721936727	0.3676043114171056	3746.731650288086	0.0037749329698006	0.1091567568791228	2144.0459734205174	53.09112224357778	0.2199455246962232	0.2097919268711999	0.0914574857602159	0.0250478594722162	53.06607438410556	0.0548003201804613	1.0344993904989082	41.8466726718994	3746.731650288086	0.9994288978192952	1.0218129551087147	1.0010140484470025	0.0080954122643669	0.0040498251729037	0.0020270350748626	0.0020280968940048	-0.000253578	0.0010140484470024	0.006269578800821	0.0020270350748626	0.9996619838509992	0.9995943806211988	0.999843992546615	0.9997971903105995	-2.73818e-05	0.00043068308169	0.0001267560558753	1.0005070242235012	0.998986349735176	0.0067766030243219	0.0002535784934186	0.9994929757764986	2.0010140484470025	0.006269578800821	0.0010137829922168	3.650401050752178	470.80519851471007	0.1344773489045158	32.34406148779787	3499.000571265353	0.0011422043614094	1.0022850614110257
6b8538d293be429fba73771d2e87adee	0.0655593541064348	1.3652315362036045	2430846.8101090565	0.0047945042159801	0.8658694416105415	33875.17491183011	1464.078250570872	0.6013004610586062	0.6232116985030388	0.1623566224195313	0.0284728278157666	1464.0497777430562	0.3502171432542655	7.520130577681794	175.82676474808116	2430846.8101090565	0.9993952320141009	56.19080166091543	1.008513159327263	642.5301353627112	11.008368380028973	0.202038824475079	0.1907942720396079	0.029348186565461	0.0055046873878066	0.0088791522659626	0.190763853585317	0.9995496360847316	0.99950539895344	0.9999696451471076	0.999936256766004	-0.0797277	0.0224074207852616	0.0001823602637212	1.0028469539808498	0.9988040733716226	0.009590291946325	0.2905610014607001	0.999401842378812	2.0056939079617	0.0089726250832062	0.0982082741286717	2.6291314248012974	15644.028615298716	0.3639500422319634	26.069339472884685	42958.0046528941	0.0862812525232403	1.0914526335380608
dacdb3b9d8664845bb14d3b5ab570120	0.06434772640075533	2.1053552640287614	7390.3755813161315	0.0043896424086546	1.0157429739391903	281.1152732896836	41.24335800548817	0.8263280099802579	0.7924433711637343	0.3235341852167092	0.0276648321369006	41.21569317335127	0.4600343167883487	1.5814465289616495	10.83259352961882	7390.3755813161315	0.9993234100910156	1.818155143886916	1.0000383656244003	3.828914174897378e-05	3.830823856350364e-05	3.834648942577376e-05	3.836562440053712e-05	0.923057735479786	3.836562440053712e-05	0.0004761834539831	3.834648942577376e-05	0.9999808171877996	0.9999808171877996	0.99999232687512	0.9999872114585332	-2.06398e-06	3.258882352522397e-05	3.836562440053712e-05	1.0000191828122005	0.9999232974536612	0.0005145490783836	1.918759713720362e-05	0.9999616343755996	2.0000383656244005	0.0004761834539831	1.9178028456577723e-05	4.5263316965784295	140.92419627749578	0.0476900833426381	47.14001345621434	2953.000676818951	0.0003382949544922	1.001015228426396
670099779ad34afdb461a94d961c591a	0.06299838855998306	1.1781630863122172	16473.53940849714	0	0.2637259246276169	15.437641809237835	7.032323822885813	0.368753635855358	0.3911153750419692	0.1036098474412146	0.0307254919813395	7.001598330904473	0.1936368616803297	0.6815337303334056	2.958803943341726	16473.53940849714	1	0.3285089816256211	1	0	0	0	0	1	0	0	0	1	1	1	1	0	0	0	1	1	0	1	1	2	0	0	2.6406710001799234	12226.562115829243	0.3447403743255299	25.66820049001637	35466	0	1
6baaafff21004c4890712c98bed54a58	0.06158968808880713	0.5638320100945762	2363.365387075043	0	0.1167877739738555	42.59779712655301	7.963734250242736	0.2661500938213668	0.2669138973165041	0.096540389464349	0.0381970803070251	7.925537169935711	0.0712915217003117	0.5975882559453931	5.40498254635604	2363.365387075043	1	0.2862758512027342	1	0	0	0	0	1	0	0	0	1	1	1	1	0	0	0	1	1	0	1	1	2	0	0	3.2041607404722843	1337.3221517074644	0.2020734590068698	32.082926944208594	6618	0	1
76e84562e8aa4bb79a2e0d3af562a2bc	0.053213679208211906	1.5502580490785904	992.8004040263728	0	0.9686184134688368	5.441953197456671	4.16475261830958	0.5687360675778218	0.5569376537205774	0.1802715169396658	0.0262114754879045	4.138541142821675	0.4029517742278943	0.8894245438172483	1.5417790591678764	992.8004040263728	1	0.4676153045806356	1	0	0	0	0	1	0	0	0	1	1	1	1	0	0	0	1	1	0	1	1	2	0	0	3.641540269347715	195.3776892430279	0.1556794336597831	39.30604657068935	1255	0	1
8c507ddda1ef482787ecd77584827b9d	0.05280181055699404	1.0135182030586734	187.78447445752585	0	0.3525725152226459	14.712940286386011	4.227774432874206	0.379345300902673	0.3619826691939803	0.1521620351648569	0.0296148648192859	4.19815956805492	0.1740945862577863	0.676765035526392	3.073904198683096	187.78447445752585	1	0.3141080559940991	1	0	0	0	0	1	0	0	0	1	1	1	1	0	0	0	1	1	0	1	1	2	0	0	4.356023886318904	23.23414634146341	0.0566686496133254	30.01389649018441	410	0	1
b0bd0f8d6ece458a8ab42bd7cad8bbf8	0.04170850926820938	0.52275464028048	737.6835950122307	0	0.1238728280162819	64.4333595187316	8.815935368514946	0.2555698843294961	0.2726748539078416	0.0844659255886633	0.0236698718526685	8.792265496662278	0.0741768424605561	0.6405310969919408	6.66226429882973	737.6835950122307	1	0.3449641204375069	1	0	0	0	0	1	0	0	0	1	1	1	1	0	0	0	1	1	0	1	1	2	0	0	2.763055612659012	540.1156840934372	0.3003980445458493	24.3887782865896	1798	0	1
d74e2eea2cfe4e0dbfa7df0a3026c38e	0.04300398768858676	0.4369304304900221	3943.869512546289	0	0.0777470162703232	70.44087152336006	10.74568476383504	0.2211230411418171	0.2389286568677657	0.0743291873622696	0.0224908499766665	10.723193913858374	0.0497945050545346	0.5664118462832901	6.712006255709999	3943.869512546289	1	0.2719269802862398	1	0	0	0	0	1	0	0	0	1	1	1	1	0	0	0	1	1	0	1	1	2	0	0	3.1199456213816417	2774.064670950948	0.225662138692829	30.505475392254954	12293	0	1
791b278b41c24217b9558b6512c1706b	0.06553865075219091	0.7160334296885994	118644.4128682434	0.0004785127187258	0.1777574693862992	28625.100842820844	222.05159211029272	0.3070159208104944	0.2984785678155709	0.1137254210010754	0.0290738038962817	222.0225183063964	0.1021397919652324	1.0184085169394903	137.22691526372287	118644.4128682434	0.999947550613674	0.9428971317437762	1.0000464710527668	0.0156364902424866	0.0019956235713179	0.0002667581603135	0.0002437230905081	0.5519828035694545	3.927101187035923e-05	0.000178695026388	0.000243718406845	0.9999931486399848	0.9999925695082692	0.9999981276023292	0.9999973418418424	-0.0353681	0.0013846633637637	4.793076233157768e-06	1.0000203555100249	0.9999802160513268	0.0001885871463936	0.0543966102885674	0.999990107879994	2.0000407110200498	0.000178695026388	0.0001276203127054	3.171841337995698	26975.03397031313	0.2358081190474424	30.91160735226626	114388.0001049006	0.0007867395722102	1.001031522632306
896b07377fcd4450a1cdda6a3c6c81bd	0.12146408162349186	1.7818619778588085	3633.059608672696	0	0.9812078646384266	3.5455798443241746	4.858000943910674	1.0035004607542657	0.5147688371784577	1.0757314475539197	0.0170944110749408	4.840906532835733	0.3848691718547367	1.1915194027676694	0.445989416494329	3633.059608672696	1	0.4127053124378004	1	0	0	0	0	1	0	0	0	1	1	1	1	0	0	0	1	1	0	1	1	2	0	0	3.4711513323961345	458.4263384134428	0.1791427660857533	32.62592347752097	2559	0	1
b41bf760f42d41d0bd0a351be5bdb932	0.07831655645330085	1.7905483771035715	32822.997578564784	0	1.0669191322955434	9.633120014163934	10.460970022128572	0.9505958103097653	0.565499981958186	0.9739987946529832	0.0228438253646801	10.438126196763893	0.4155812570226378	1.2078078871992255	1.4686046041311862	32822.997578564784	1	0.555167497802178	1	0	0	0	0	1	0	0	0	1	1	1	1	0	0	0	1	1	0	1	1	2	0	0	2.9686753338352645	6442.37	0.2863275377777777	30.180686506666667	22500	0	1
e1e172abbe5245209140dad71a85a212	0.08278628597578999	1.603601099586749	20115.32577944484	0.0019556485744426	1.0462420869880789	1211.2193383980202	54.16587291756256	0.7697722208272904	0.5587806016011867	0.6214818097037277	0.0234849497572483	54.14238796780531	0.432331111790687	1.1307270036661068	20.733209472365544	20115.32577944484	0.9997457815651184	0.6859942848623531	1.0001737702475313	0.0009169201346282	0.0004922678843738	0.0002799626114233	0.0002800029910201	0.153790395440568	0.0001737702475314	0.0018000153222283	0.0002799626114233	0.9999308203334822	0.9999237381505832	0.9999769027505976	0.9999618690752916	-5.46832e-06	0.0001024778975857	8.081659697875656e-05	1.0000868851237656	0.9997587161167688	0.0019206691980149	6.0331573275965926e-05	0.999879346124213	2.0001737702475317	0.0018000153222283	0.0001399914006108	3.815249929821211	1954.3176126612848	0.1242177342313154	41.47912652976213	15729.000381364012	0.0003177669836637	1.0006991673552406
f1fbc8443d7d4521a07cb582a6b89d07	0.05406413047263714	2.232911255040241	16317.889045659877	0	1.342942608301692	13.284961419632198	14.179630149129965	0.9905749987038928	0.7780495461696875	0.8017296122053442	0.0198811290310838	14.15974902009888	0.5632524961432287	1.4333085997773225	2.1415041547089904	16317.889045659877	1	1.0731347141384109	1	0	0	0	0	1	0	0	0	1	1	1	1	0	0	0	1	1	0	1	1	2	0	0	3.894914664268243	822.5168072516682	0.1035524118408244	34.6785261455198	7943	0	1
41aac299556541d4b3d7def6b95d2c0d	0.051691518053879816	0.3250088238153589	11572.055469719398	0.0003438614264689	0.0683714138847688	10201.467052325384	67.87651745862888	0.1692734775575651	0.150784030330481	0.0738932545915583	0.0438323954477756	67.8326850631811	0.0406084634916537	0.4832482357746994	72.07060606416587	11572.055469719398	0.9999596399887156	0.2048753471749279	1.0000629151376406	0.0005032530512933	0.0002516350311033	0.0001258260219352	0.0001258302752815	-1.57291e-05	6.291513764076931e-05	0.0005142775077431	0.0001258260219352	0.9999790282874532	0.9999748339449436	0.9999903207480552	0.9999874169724718	-1.3087e-06	2.671781292019964e-05	7.864392205096164e-06	1.0000314575688205	0.9999370864573642	0.0005457350765632	1.5729050248911878e-05	0.9999685424311796	2.000062915137641	0.0005142775077431	6.291407430419965e-05	3.247688330469935	11337.906907755332	0.2288036427210326	32.95664565372402	49551.00004036083	8.072002256873318e-05	1.00016144330313
b686f9e6d4a94105af8587127eb676ef	0.06115849899302601	1.03892269339206	728.3990941604814	0	0.2541584448024621	22.857809307585228	6.368010406623956	0.3756414686348823	0.3693919952129341	0.1404852854760516	0.0340951911710872	6.333915215452868	0.1535390182487996	0.7162102404767187	3.814399310170471	728.3990941604814	1	0.3718505956055479	1	0	0	0	0	1	0	0	0	1	1	1	1	0	0	0	1	1	0	1	1	2	0	0	4.41324990400056	76.04366197183099	0.0535518746280499	31.78432652251537	1420	0	1
e339f95dbd504e02b587898d66b10b81	0.05498215763805351	1.1524989133790806	18752.847450312096	0.0033222881610647	0.2257919748423057	2506.885021038945	76.76667147411248	0.3676460572777654	0.4132659974386171	0.0898245933019889	0.0250397816931124	76.74163169241938	0.1683826475204127	1.0426210114102463	37.16193523186392	18752.847450312096	0.9995363461340796	0.9518949500022392	1.0006164368129948	0.0108154314678287	0.0035029585659321	0.0012683227865141	0.0010918886028152	0.0834840626266292	0.0005362258435714	0.0047689484618586	0.0010915820103425	0.9998024359805696	0.9997874533541388	0.9999511833031434	0.9999087556024012	-0.0848076	0.0103502211833354	0.0002583800835732	1.0002861214519927	0.999297056422422	0.0051911745269494	0.1197291595385368	0.9996484434651716	2.0005722429039854	0.0048445338329271	0.0005900528473323	3.767695933952143	2248.3973682685064	0.1303343208085622	41.9650832502845	17243.001507159006	0.0006954908796275	1.001391223697177
2b7cb7ef4a0d4f73b6b0c7882d98d767	0.05597797126317615	1.7325544771586712	207.92122959821015	0	0.9006411195760671	5.240953249685777	3.59788709586304	0.6590068099218016	0.5635273073405559	0.3726151882187527	0.020139794329294	3.577747301533745	0.3840070364118624	0.9766100082677172	1.5484659139408674	207.92122959821015	1	0.5194771327253608	1	0	0	0	0	1	0	0	0	1	1	1	1	0	0	0	1	1	0	1	1	2	0	0	4.176530522457842	15.027522935779816	0.0689335914485312	27.021378671828973	218	0	1
842b7efc916b488b950b86ed9e5e9213	0.07791129856364057	0.2207689320793157	9766.02107238434	0.0006829800932172	0.0440083774953195	12502.67718822428	63.78904667582166	0.1578373856312242	0.0962034450506682	0.1010176066610852	0.0661057608837891	63.72294091493787	0.0224560932128966	0.4422648198198611	89.23620224078749	9766.02107238434	0.9999198886452892	0.1706855305473944	1.0000341350085942	0.000220815851629	0.0001141418895123	6.080554378275057e-05	6.080754210897108e-05	0.3846055116081155	3.413500859414729e-05	0.0003483239801371	6.080554378275057e-05	0.9999873779179554	0.9999855997490544	0.9999951502857976	0.999992799874527	0	1.7664971494773386e-05	1.0796541768676489e-05	1.000017067504297	0.9999584035316296	0.0003691227219736	1.039956017257623e-05	0.9999792012581634	2.0000341350085944	0.0003483239801371	3.040327147293041e-05	3.5773908777096546	7634.083738909251	0.1528987910614923	33.84702295284902	49925.00012017064	0.0001001385916809	1.0002203128442388
a6e4fd39c041437cbbe23c4cbed2205d	0.07959771245078973	1.6265646577643629	27812.27012787098	0	1.0261556404192849	7.140851729505023	8.379990129791544	0.7923013874668471	0.5520287554891267	0.6977239632160315	0.0284402553954623	8.351549874396081	0.4213396895273845	1.0469859845741234	1.3502777908225183	27812.27012787098	1	0.4684381633127556	1	0	0	0	0	1	0	0	0	1	1	1	1	0	0	0	1	1	0	1	1	2	0	0	3.147200812376444	6242.463660728362	0.2460375083055479	31.24971536263092	25372	0	1
a764e6f978f644fba7a522ad2b286606	0.07522917284506471	1.060434924393152	44529.63977454096	0	0.1892809164812291	60.3772643031375	16.854200940108207	0.3512392932312707	0.3516837737439131	0.1225651548350011	0.0334382416697074	16.8207626984385	0.1396610087603823	0.6842951565997001	5.157163788353882	44529.63977454096	1	0.3448908202362054	1	0	0	0	0	1	0	0	0	1	1	1	1	0	0	0	1	1	0	1	1	2	0	0	2.8880459619040604	24726.55903508034	0.2600168149562583	30.27155909533656	95096	0	1
2a780f5673ff43e2bef4877de575cbf5	0.042578423371109994	0.5703981714115338	329.4059667302647	0	0.1175087282169831	32.60354938583942	5.303139728647268	0.2364665859161026	0.240168706830548	0.0891236757044804	0.0230528738545711	5.280086854792697	0.0738829781997037	0.4987945943766372	4.612356180858726	329.4059667302647	1	0.1928796011245364	1	0	0	0	0	1	0	0	0	1	1	1	1	0	0	0	1	1	0	1	1	2	0	0	4.0323739240141245	124.66314199395772	0.0941564516570677	39.61380874581283	1324	0	1
8bd39dc310494983a5b3db2a25a43914	0.04217463581042741	0.1594659496755756	2861.6776953233275	0	0.0312804399792555	242.32205094197437	11.662571959435208	0.1148869143895068	0.0951661232940093	0.0585305641012108	0.0230408412018256	11.63953111823338	0.0168707069393939	0.3054544041057865	12.105103018297765	2861.6776953233275	1	0.0801033898896792	1	0	0	0	0	1	0	0	0	1	1	1	1	0	0	0	1	1	0	1	1	2	0	0	3.160648832536591	6568.275406736005	0.2141526329997719	37.80619394575083	30671	0	1
d4923624d79745e09e110a776ff77cbd	0.04581204173503486	2.1324663745672283	9724.97109260882	0.0031385648189961	0.9468095667327506	98.7495245403869	29.720805345232023	0.7344221048476985	0.8042540317516595	0.1754380138668648	0.0256732884921359	29.69513205673989	0.4510201637699386	1.502820625049766	6.720480674378211	9724.97109260882	0.9995356396814176	1.7190940029860453	1.0007778588526568	0.0007753436077893	0.0007759711074377	0.0007772292542304	0.0007778588526567	-0.000389087	0.0007778588526567	0.0091314342316787	0.0007772292542304	0.9996110705736716	0.9996110705736716	0.9998444282294688	0.999740713715781	-4.40844e-05	0.0006607861341121	0.0007778588526567	1.0003889294263284	0.9984452266923256	0.0099092930843352	0.0003890868915914	0.9992221411473432	2.000777858852657	0.0091314342316787	0.0003887720267217	3.9878909532364295	399.3037621922898	0.0927319466308151	47.01799992190549	4304.000464468184	0.0002321801592912	1.000696702275894
f508021270e2444d9c3a57da60a64563	0.027738145277834487	2.2287560719067887	1291.5147438328702	0	1.3597920474939391	11.20599413560774	7.793208982523731	0.8642481498552042	0.840244776655592	0.3684230110565834	0.0123850757761976	7.780823906747533	0.5797433850562482	1.4074270262075737	2.297422924140472	1291.5147438328702	1	1.2339259695713511	1	0	0	0	0	1	0	0	0	1	1	1	1	0	0	0	1	1	0	1	1	2	0	0	4.0331828623703885	61.61963190184049	0.0945086378862584	38.03059016146637	652	0	1
195cdf8eaa8c4bbcb21ffe28cec221cd	0.05879575129612899	1.3170627080863635	1249.369280957491	0	0.3113891722802375	19.35482265185323	6.559763858218196	0.4494343232027442	0.4832388653724696	0.1311959384071121	0.0279286406182003	6.531835217599996	0.2082067132199707	0.8886733819981286	3.522245158509835	1249.369280957491	1	0.5877491689992831	1	0	0	0	0	1	0	0	0	1	1	1	1	0	0	0	1	1	0	1	1	2	0	0	4.27266432027369	96.03539823008848	0.0607050557712316	27.834156702856568	1582	0	1
6f9b2b66123d4fecbe6a398f42c7eb78	0.0452908509169488	1.8455960337311068	6722.352979127354	0	1.117468356839378	24.75729846818296	14.815561921819375	0.7498251016202447	0.7108995543023021	0.2984041137501046	0.0182054929762674	14.79735642884311	0.4860187815045825	1.2407065084284203	3.202384093539528	6722.352979127354	1	0.9771149570368316	1	0	0	0	0	1	0	0	0	1	1	1	1	0	0	0	1	1	0	1	1	2	0	0	3.72667162947211	606.6784978245936	0.1389234022955332	35.66584521408744	4367	0	1
9d639b27c60d49c9bf31d1b4fcb0d255	0.04166487110286236	0.2850927146728083	3154.567532689496	0	0.0597823976110672	134.20477713354134	14.576055914949118	0.2007166415901252	0.2215066121212371	0.0674965961653649	0.0232473780735823	14.552808536875537	0.0339649449343358	0.6869920225170152	10.002513872126112	3154.567532689496	1	0.4316708687908004	1	0	0	0	0	1	0	0	0	1	1	1	1	0	0	0	1	1	0	1	1	2	0	0	3.878934422489409	715.0041891083184	0.1069724998665946	38.49148855704074	6684	0	1
3c276692b820484abb9af552c927956f	0.05556829989852986	1.369732254980599	2498.4116115075885	0	1.0153158226152317	5.284307999742279	6.209016107951626	0.5978127783854011	0.5178932775738205	0.3116350519945345	0.0298933399336017	6.179122768018025	0.4223328450183058	0.8432010064350941	1.091139449618461	2498.4116115075885	1	0.3536078192522825	1	0	0	0	0	1	0	0	0	1	1	1	1	0	0	0	1	1	0	1	1	2	0	0	3.41694418141495	620.9214570290268	0.1766993332467349	32.75937084251012	3514	0	1
bb56358ff4a0405fb083bec945d2a95e	0.05404687086102969	0.2348880165843254	821.9890654754948	0	0.0485069941474273	57.03399205126123	4.061433342913631	0.1505036468092606	0.1248399785211865	0.0740620161078768	0.0348528726697596	4.026580470243872	0.0269251452783062	0.3346455006424016	6.648238824008179	821.9890654754948	1	0.089336263397317	1	0	0	0	0	1	0	0	0	1	1	1	1	0	0	0	1	1	0	1	1	2	0	0	3.155628018794004	1513.1455040871936	0.2061506136358574	31.727305050895023	7340	0	1
51ff6ae8e4314a4f9d95be5f93218874	0.10055137780343781	1.7993970189829127	4746.749325088966	0.0041933866363192	1.0039575515196877	200.75314847909308	26.341655312196053	0.7955129703610019	0.6149450380409501	0.5026452130743457	0.0361944096550207	26.305460902541032	0.4269095001003387	1.2352308882082947	8.873469906509174	4746.749325088966	0.9993573265445526	0.8929544611712688	1.0006444238522718	0.0006426726863784	0.0006431096911094	0.0006439855886101	0.0006444238522718	-0.000322322	0.0006444238522718	0.0077355985627127	0.0006439855886101	0.999677788073864	0.999677788073864	0.9998711152295456	0.9997851920492428	-3.57829e-05	0.0005474162648513	0.0006444238522718	1.000322211926136	0.9987118096909487	0.0083800224149842	0.0003223215314299	0.9993555761477282	2.000644423852272	0.0077355985627127	0.0003221023602204	4.380250897426879	167.03214400514304	0.0536908209595445	33.004247120962404	3109.000642880103	0.0003213367277237	1.0009643201542913
a4f369b3d1784678bb5c574c0defc290	0.0884674326387401	1.083650315915612	26125449.37933572	0.0521844584616318	0.2143951914007453	7188.938226125381	3217	1.184650592420188	1.7344184753931706	0.1533049317202736	0.0426098600410231	3216.957390139959	0.1453063404679406	30.71640653083324	79.64480882554172	26125449.37933572	0.9914275667990592	942.0942331412932	1.1772349405952964	48591.13762179599	378.0948347742108	3.4554250532072293	2.9867306940755336	0.074220486779762	0.0534707609815982	0.0889509288706293	2.9838438489960595	0.994743998593666	0.9941995781809034	0.9998865596425056	0.9996899676271608	-0.12911	0.116094238113227	0.0038058015506405	1.0295927330120018	0.983783829378205	0.104236638824342	0.3501176806760542	0.9918555797772444	2.0591854660240028	0.0931949210848782	1.6105389368206906	2.936012562495612	7807.966341639581	0.2819778382679516	27.92624345716864	27452.629324665944	1.4735917103681435	2.529758035391838
e69d900ebe9846f4b86a0dd07cb16da5	0.08169915254840299	1.7272651596473536	89079.55978458199	0.0003003129148372	1.0455341154488766	51.81241801170296	28.891838799847225	0.9624634419335452	0.561103812030709	0.9968817898894796	0.0162551585664857	28.875583641280738	0.4075923369217776	1.2452248941034787	3.3059887529665835	89079.55978458199	0.9999651871192448	0.6242491598364526	1.0000287033532054	2.869971166510325e-05	2.8700621972044234e-05	2.870244277339302e-05	2.870335320531301e-05	-1.43519e-05	2.870335320531301e-05	0.0004723251643722	2.870244277339302e-05	0.9999856483233972	0.9999856483233972	0.9999942593293588	0.9999904322155984	-1.187e-06	2.437856177354933e-05	2.870335320531301e-05	1.000014351676603	0.9999425946592372	0.0005010285175772	1.4351904214341172e-05	0.9999712966467946	2.000028703353206	0.0004723251643722	1.4351448994676508e-05	2.6609556181399143	20545.723006492717	0.3576341277740729	24.07725884315004	57447.000034813485	1.740644037766763e-05	1.0000522202301172
11d0571d0f6a44e6a2fb8afe63cb67b2	0.04942296204382395	1.0440820474012371	500160.2956288472	0.0017147406894162	0.2051701909235683	13774.045205143517	430.08417539569984	0.3459341143506928	0.3881644132839569	0.0882080181465261	0.0426280787016846	430.04154731699816	0.1498811561164754	3.172411532868369	113.2180723091647	500160.2956288472	0.9997987927572723	9.944524522404636	1.0016560682703088	5.0772101471797	0.2487566444541576	0.0139308299176053	0.0109378431234804	0.2256622791164924	0.000815738845206	0.0013189856634208	0.0109369345658295	0.999932116752228	0.99992543383791	0.9999795259046302	0.9999734986687244	-0.0746869	0.0032625581872026	5.275520702441136e-06	1.0004537781560412	0.9998422623146672	0.0013978589794578	0.0769604941179319	0.9999211266839622	2.0009075563120824	0.0013189856634208	0.0062171682602714	3.313873171403256	10204.595549027104	0.2053362486473449	36.55626768013141	49687.00060365817	0.0141445857390484	1.01627864861058
3389b15af4d54906958348c041e06cf8	0.07833799846093763	0.5133744743517313	20464.595003052105	0.0009929760232401	0.1329452630767423	11241.882674839107	89.77372165735494	0.2458574695852569	0.1976275207523923	0.1205975627600255	0.0687376811505388	89.7049839762044	0.0715799272746374	0.6432616977601318	82.46863564017202	20464.595003052105	0.999878688215504	0.3533397164543815	1.0000714228942682	0.0013858834874677	0.0004420322013175	0.0001550217536307	0.000134319696793	0.4076772732279651	6.279342636112641e-05	0.000622666892513	0.0001343121149038	0.9999776878950888	0.9999757559138628	0.9999940818583132	0.9999895013595362	-0.0316301	0.0019480983946914	2.6996509538166956e-05	1.000033122606762	0.999923251303552	0.0006610429308693	0.0384781297343872	0.9999616239616432	2.000066245213524	0.000622666892513	7.233536260594914e-05	3.610029295114887	8061.382837616516	0.1629978130015268	38.770925355288846	49451.00028307419	0.0002224052107969	1.0004246112784845
4ec4e53c6f1744cb8db10351b0e43ddf	0.05440650960866651	2.1005676272722944	16498.463952153703	0.0016238786505306	1.0540056091987122	47.48477436448808	25.804951093604835	0.8054632512547065	0.7510659766824004	0.3559262216864792	0.0216615866689132	25.78328950693592	0.4646918087089652	1.3558277781592571	4.027226445511112	16498.463952153703	0.9997771836034792	1.1894979149064655	1.0000901032382792	9.004173936084309e-05	9.00571074055831e-05	9.008785953834913e-05	9.010323827908632e-05	0.4614934060743026	9.010323827908632e-05	0.0012590173773466	9.008785953834913e-05	0.9999549483808606	0.9999549483808606	0.9999819793523442	0.9999699655872404	-4.342e-06	7.65299080502465e-05	9.010323827908632e-05	1.0000450516191397	0.999819816591553	0.0013491206156256	4.505546415894583e-05	0.9999098967617208	2.000090103238279	0.0012590173773466	4.504777445435885e-05	4.322153875183041	540.4856824512535	0.0602212459555714	35.89461787540445	8973.000222841225	0.0001114081982604	1.00033426183844
e59450e1904a4fc395f97958838c20ab	0.05381383642593532	1.4996382892169215	58931.28980118209	0.0003443002782124	0.9990675490498484	139.60744763484183	31.17017543096185	0.8770323368121111	0.4849419665304422	0.9869084356070116	0.0342670286605751	31.13590840230128	0.3723914138321745	1.091291001363107	4.180416386984614	58931.28980118209	0.9999595837122524	0.4217303298419803	1.0000119567751953	1.1955712373336506e-05	1.1955978064042925e-05	1.1956509480912508e-05	1.1956775195256889e-05	0.4615324830844347	1.1956775195256889e-05	0.0002020795324376	1.1956509480912511e-05	0.9999940216124024	0.9999940216124024	0.9999976086449608	0.9999960144082682	0	1.0155195828712404e-05	1.1956775195256889e-05	1.0000059783875974	0.9999760868481812	0.0002140363076327	5.978454026827591e-06	0.9999880432248046	2.000011956775195	0.0002020795324376	5.978321169042349e-06	2.224878774357484	22483.655484601084	0.454362126841021	20.010888193495	49482.00004041711	2.020814387373172e-05	1.000060625656778
077048057f5a4169b2956ffcf7af4741	0.06000333863743497	1.3973490002087536	27787.049818460546	0.0005296505186261	1.0230318105434235	269.6124330074853	38.41094972286204	0.6208236051170123	0.5706128922494014	0.2215624920236378	0.0176292230035597	38.39332049985848	0.4516512781130988	0.9485527318109858	6.659675722795931	27787.049818460546	0.99993524154909	0.5143303363555998	1.000010699984028	1.069849540772806e-05	1.0698867530411462e-05	1.0699611853464336e-05	1.0699984027938904e-05	0.6923023422226332	1.0699984027938904e-05	0.0001739186214678	1.0699611853464336e-05	0.999994650007986	0.999994650007986	0.9999978600031943	0.9999964333386574	0	9.087805048911657e-06	1.0699984027938904e-05	1.000005349992014	0.9999786005902056	0.0001846186054956	5.350085059139333e-06	0.9999893000159722	2.000010699984028	0.0001739186214678	5.34989897035081e-06	2.573212816725072	10962.271379075866	0.3549613502274995	27.6287671600262	30881.00006476055	3.237922545497727e-05	1.0000971408218111
943092de0de340cf938fdbd12386d951	0.055707428629349215	0.2517979495298891	4933.376109410991	0	0.0450262467399339	89.10046369297542	8.455823051424359	0.1630565384323359	0.142613008419898	0.0774364483299312	0.0314891337217094	8.424333917702649	0.0264959338179464	0.3910932517790618	7.870674128523974	4933.376109410991	1	0.1263664968615848	1	0	0	0	0	1	0	0	0	1	1	1	1	0	0	0	1	1	0	1	1	2	0	0	2.7925403101209425	9278.62268245799	0.2876735500235006	27.730445373625606	32254	0	1
3f7590be1cb745daaba5d3712c3dbc4d	0.11737599642967356	1.675093219403128	38670.44057226589	0	0.7617249509564895	4.643087965227945	5.830236383016231	1.0369008327226814	0.4587719959865828	1.1154331539222977	0.0248968540723336	5.805339528943897	0.3219400300308835	1.1985608805005905	0.3970148415012078	38670.44057226589	1	0.3613848473653611	1	0	0	0	0	1	0	0	0	1	1	1	1	0	0	0	1	1	0	1	1	2	0	0	2.570274797507607	9942.967606523274	0.3693661579747863	23.058359893380505	26919	0	1
48e208579e4c4699b4ccc52b095bdab6	0.07627681572431619	0.4858159492559792	34831.93238740604	0.0013362628727308	0.0566329599734657	7872.383904991067	92.9364607512594	0.2342657931282882	0.2212606141751473	0.0975965029292279	0.0662811895953236	92.87017956166407	0.0454968819644647	0.838811260428275	75.5590914750346	34831.93238740604	0.999838409138462	0.6487238687912454	1.0003491814794798	0.0067402837486276	0.0023947631791489	0.0008840239956146	0.0008841474705695	-6.90405e-05	0.0003491814794797	0.0024189195198077	0.0008840239956146	0.9998961693053324	0.9998789058593692	0.9999621079085664	0.9999458929376992	-6.75966e-06	0.0001319067931328	5.487301979175337e-05	1.0001745907397397	0.9996894244364596	0.0025742218175129	7.765725755465696e-05	0.999844697702294	2.00034918147948	0.0024189195198077	0.000442042866546	3.069504044176353	12508.159034440963	0.2526645598311476	28.41054365661724	49497.00044439956	0.0004645664842265	1.0008281991718009
fc1dbe311c454faa9f9e161b04e57fbf	0.05599818928495402	0.6098141009343399	31.81255549430456	0	0.1296182188423907	16.188026154210522	2.6213490579677625	0.2491249917645822	0.2290378729934137	0.1101891900935053	0.028627240424147	2.5927218175436155	0.080736828721584	0.4530367463149566	3.378692271664671	31.81255549430456	1	0.1431790319899392	1	0	0	0	0	1	0	0	0	1	1	1	1	0	0	0	1	1	0	1	1	2	0	0	4.203319651854887	9.438709677419356	0.060894901144641	25.889531737773154	155	0	1
3e9c3800d97c4f9787d52b4750ebf7d9	0.0667104595507101	1.464523395674407	6371.711206854763	0	0.8746831123483535	8.489805113881838	7.688435686524237	0.598624425923943	0.5131423087164786	0.3118810222861979	0.0284397603591756	7.659995926165061	0.3635130913849081	0.8838721160135404	1.8177973576824933	6371.711206854763	1	0.4228787141534831	1	0	0	0	0	1	0	0	0	1	1	1	1	0	0	0	1	1	0	1	1	2	0	0	4.180238075858393	624.7265816576753	0.0765971777412549	46.267528774959885	8156	0	1
ab3d53e14e5d4956938faa89d3a04b8e	0.0865022418896656	1.516371237031101	5380.420431533312	0	0.933393061109218	7.13678653332226	5.785644019643943	0.8709720967177275	0.4787568882095176	0.9485538344662356	0.0245635421446081	5.761080477499335	0.3632674328272487	1.0635098850014306	1.0238975295394266	5380.420431533312	1	0.3724608822348819	1	0	0	0	0	1	0	0	0	1	1	1	1	0	0	0	1	1	0	1	1	2	0	0	3.2086516926925084	1085.010931259197	0.2280872254066001	32.916265725528284	4757	0	1
b496c07c69c1411293af135f3423384c	0.05701682879247327	0.4695337665526369	1577.4910582664918	0	0.1208733877426489	48.3565312009728	7.598705931824853	0.2225183661740408	0.1984670059235433	0.0975556630934551	0.0328383023400983	7.565867629484754	0.0663279175735513	0.438154029056391	5.346235345665103	1577.4910582664918	1	0.1424645298935842	1	0	0	0	0	1	0	0	0	1	1	1	1	0	0	0	1	1	0	1	1	2	0	0	4.031943328952903	793.0676645977851	0.0965154757938158	34.2562928537143	8217	0	1
ef96a5023d3341f2961110766e3027eb	0.0764622854032738	0.8758288993640263	169.25335174248025	0	0.3310823399556262	18.27	3.810005246498645	0.3888511763833585	0.2977692321681103	0.2332885594508131	0.0365629245865884	3.7734423219120568	0.1515825670488454	0.6146524710268925	3.408977813210985	169.25335174248025	1	0.2265924227647431	1	0	0	0	0	1	0	0	0	1	1	1	1	0	0	0	1	1	0	1	1	2	0	0	3.963912313985224	36.3438	0.0811244419642857	22.643813775510203	448	0	1
095b0434f84042e6a97a6d404ec911ed	0.09733819089735753	0.91868885267651	17014.60048878434	0.00034324645739	0.2639301373770982	4756.141039790888	58.60228610393895	0.3483318434135649	0.269542622409649	0.1824176942319053	0.0662811895953236	58.53600491434363	0.1426659270864251	0.5853980233102566	40.3276435723342	17014.60048878434	0.999959718837502	0.2213557725596634	1.000100219921381	0.0008015980011464	0.0004008191692633	0.000200429756379	0.0002004398427623	-2.50556e-05	0.0001002199213811	0.0007879343767295	0.000200429756379	0.9999665933595396	0.9999599120314476	0.9999845815505568	0.9999799560157238	-2.16147e-06	4.256001106567676e-05	1.2527490172643828e-05	1.0000501099606909	0.9998997838610124	0.0008380443374198	2.505561075993756e-05	0.9999498900393092	2.0001002199213813	0.0007879343767295	0.0001002173997853	3.357631125302916	10850.64632426989	0.2185427255643482	38.01561769688931	49648.00004028197	8.056232499601947e-05	1.000161127895267
6031bb1e0da14618b019ad84cfe55d45	0.06017304437873311	1.619852859919794	2526.23311995562	0	0.9279474646036874	8.233735657366386	6.472117989585925	0.6592338227645255	0.5717043965719947	0.3326335216526064	0.0278642111642601	6.444253778421665	0.3978812611647168	0.9876130735234562	1.8846043178136933	2526.23311995562	1	0.5407903499177179	1	0	0	0	0	1	0	0	0	1	1	1	1	0	0	0	1	1	0	1	1	2	0	0	4.193569275724605	189.14208494208492	0.073027832023971	38.011278305332354	2590	0	1
2e5da6f5d63c480cb63c557c6e659527	0.06003329630212555	0.2823799260450939	150559.55001379785	0.0050087783962637	0.0588322740094193	10044.14016291284	374.2604170661591	0.2123661290849165	0.2095609876238467	0.0864604554876734	0.0356363715048301	374.2247806946542	0.0324404927515095	3.613908646544467	97.74502562099792	150559.55001379785	0.999306203018472	13.015236332786348	1.0019247038795878	3.156233662143231	0.2136226444204217	0.015057218085264	0.0126498233201807	0.164567194809791	0.0012181930502913	0.0040435853865842	0.0126475177069191	0.9998120571770822	0.9997996535748026	0.9999678704513294	0.9999492727740588	-0.143753	0.0142061079928254	0.0001788190551368	1.0006610916934744	0.9994146274660856	0.0043363397787912	0.1983690653605606	0.9997072456077924	2.001322183386949	0.0040435853865842	0.0069267603513612	2.855442095822484	2967.22692574601	0.2573930365844907	32.72176172091149	11520.001908396947	0.0179535639261808	1.0212526023594726
801d8dc4d7ba478084b514dbb428021e	0.0607215685608817	0.5818853220995447	1642527.053992241	0.0020734605633824	0.0923899317921402	32645.17247358045	857.7169270360015	0.2759433135527437	0.294773165668475	0.0917929177516099	0.03046632665648	857.686460709345	0.0651268343272051	3.765521371411763	170.57750206761438	1642527.053992241	0.9997583072643133	14.103006486264253	1.0013914514677096	13.669086091410692	0.4400685645162112	0.0161477831011527	0.0136950198338185	0.0486017655387352	0.0007298770216048	0.0017144598530021	0.0136943304743136	0.999930003843078	0.9999254760437136	0.9999923813080914	0.9999859022491544	-0.0546089	0.0055112204865159	5.112462170751515e-05	1.0003890321311253	0.9997978268776296	0.0018155527833758	0.1370019784784696	0.9998989070696244	2.0007780642622515	0.0017144598530021	0.0074607007337428	2.109795273801092	52793.37718942343	0.4557399987001445	23.07962853204527	115813.00207180531	0.0213989671606222	1.0234545627195897
5bdf6e3b1fef4fb5afb96ad2fbdf0a47	0.08046338251438752	1.2433057035732575	13485.323921747648	0	0.7214370846989521	9.537266486511552	6.653545655536616	0.4582305744037136	0.4438226686965652	0.1430718630937882	0.0517834019314131	6.6017622536052025	0.3102342572373208	0.7213371955497059	1.9912058708923517	13485.323921747648	1	0.3103520903651572	1	0	0	0	0	1	0	0	0	1	1	1	1	0	0	0	1	1	0	1	1	2	0	0	3.2108392958762604	5891.078867152834	0.2273055857990058	38.877626467254345	25917	0	1
a71c5e63aa1946d29d578c8f809b1dbd	0.013895550083622192	2.3276103350758404	2670.4247214733928	0	0.6840557270489742	26.05116824634181	14.975095677485244	0.7312838971895119	0.9170910368807104	0.0967051374011899	0.0051853694203313	14.969910308064913	0.3951438363148061	1.670452770098569	4.026582509612767	2670.4247214733928	1	2.2556363188413013	1	0	0	0	0	1	0	0	0	1	1	1	1	0	0	0	1	1	0	1	1	2	0	0	4.447585392863046	47.80459770114943	0.0499525576814518	35.47263577292763	957	0	1
a9ac43f421e0469081fbc114773d6586	0.07749942330366917	0.2721860443298747	4044.1747661901672	0	0.0627159121735163	79.08769774383644	5.888567547253555	0.1682815163031513	0.1042810726745222	0.1053932632273764	0.0659307964854785	5.822636750768076	0.0319559305063003	0.2862438606450857	7.137358982024984	4044.1747661901672	1	0.0536168790277154	1	0	0	0	0	1	0	0	0	1	1	1	1	0	0	0	1	1	0	1	1	2	0	0	3.7863574539014055	6344.6980023501765	0.1285444710553542	33.56802550633681	49358	0	1
9227352910f440c6a54702bdf767e949	0.11248744259823523	1.54345868735371	7225.955752288444	0	0.9179894773535108	3.9118322200930784	4.516953562082903	0.898364624175051	0.463649422690962	0.9777463079397266	0.0232475175427382	4.493706044540165	0.3536143546631601	1.0652367025489482	0.455974499351882	7225.955752288444	1	0.3276702344881757	1	0	0	0	0	1	0	0	0	1	1	1	1	0	0	0	1	1	0	1	1	2	0	0	2.9744304300432014	1866.0009422110552	0.2930277861512335	30.20628069682584	6368	0	1
b7c12b89647844fdaee28caf78ce67d5	0.07121419353380183	0.5632761175864496	10593.804781777437	0	0.1317995508983916	45.61425973248432	8.452124373385447	0.265959826633218	0.2324333642777629	0.1224802319171401	0.0321242754200652	8.420000097965382	0.0746222790832387	0.5195842162226432	5.365792769208294	10593.804781777437	1	0.199233128364927	1	0	0	0	0	1	0	0	0	1	1	1	1	0	0	0	1	1	0	1	1	2	0	0	2.9516118309349357	10790.148492647995	0.274971292593155	28.017908719094123	39241	0	1
e54a36267ab3427d843b2979b0d84bf4	0.07395641102987936	1.3295533507355766	37837.147794804725	0	0.698821475753016	9.943549191876084	7.73859021427177	0.4889467010504784	0.4557368691339626	0.1810361840350349	0.0189765677774546	7.719613646494316	0.3098526207151013	0.7616267068679594	2.054169870860545	37837.147794804725	1	0.3410063641463865	1	0	0	0	0	1	0	0	0	1	1	1	1	0	0	0	1	1	0	1	1	2	0	0	2.1464139701096348	31265.79192984608	0.4793308384412534	19.716982774657183	65228	0	1
18008b2cf33e4a119704aa8d69ced2c1	0.07203099319082157	0.8186482120983889	15580.01903977288	0	0.1174062927331001	50.39309711259752	14.182415883051538	0.2824894433385399	0.2805596463578295	0.1010821828311674	0.0650861691685372	14.117329713883	0.0903464487951864	0.5605372183298793	4.880318062523823	15580.01903977288	1	0.2344016875352807	1	0	0	0	0	1	0	0	0	1	1	1	1	0	0	0	1	1	0	1	1	2	0	0	2.760721327717964	16558.972855241398	0.333944517711479	28.12709653630605	49586	0	1
dea14add9a6b4aac92314018740883bb	0.04854395650368704	2.5079942620767817	5664.259688829937	0	1.050534514515742	31.48298526271941	15.988582726834451	0.899628439020329	0.9537691540210752	0.2670729374415944	0.0243143144430236	15.964268412391428	0.4963084268967055	1.7899069228104083	4.348834681444029	5664.259688829937	1	2.394435464030471	1	0	0	0	0	1	0	0	0	1	1	1	1	0	0	0	1	1	0	1	1	2	0	0	4.501647156166111	82.70135746606334	0.0467767858970946	37.321767316394016	1768	0	1
edd3c02746f64374a40fda22cc4ef4b4	0.09572161949044211	0.2353281372228408	2153.781364404548	0	0.0445129287102944	1916.2308503893944	20.789923158618517	0.168304057520583	0.083680428901962	0.1193688404417332	0.0658913570632647	20.72403180155525	0.0224196299054957	0.3475660233397521	34.84484184123492	2153.781364404548	1	0.0924758848023174	1	0	0	0	0	1	0	0	0	1	1	1	1	0	0	0	1	1	0	1	1	2	0	0	2.9740628276262124	4270.640922093219	0.2395333962697413	31.304316691444946	17829	0	1
8bbda4d381b347a5a1e7bdb64a7cfd33	0.048486781160707926	0.2715613071350033	1033973.761030103	0.0014577178420761	0.0455308037248792	21293.9204678876	1011.2418699059642	0.2032118304165596	0.2247965895517402	0.0681435482988161	0.0274693143365489	1011.2144005916276	0.0293121112888915	6.895171883434196	145.25925657476978	1033973.761030103	0.9998160877270296	47.50210025408023	1.000922694768399	54.21685081114934	1.3561288728277792	0.0341163598971153	0.0341185464171852	0.538447394037883	0.0009226947683987	0.0007220486031179	0.0341163598971153	0.9999604876622418	0.9999562149917994	0.999989536283684	0.9999878260903118	-2.01378e-06	3.9334043023698766e-05	2.8052755705374697e-06	1.0004613473841997	0.9999073840676204	0.000768359674984	2.315676815268023e-05	0.9999536889281336	2.000922694768399	0.0007220486031179	0.0170587265785751	3.2561743253712905	4465.95208754828	0.2053500132218264	32.6499769763975	21744.00027588744	0.0739799053102758	1.0779382012139047
0086fb27037648fda3258dd4fabbb668	0.04095567912679723	1.596032855353858	13022.143630571758	0	1.0832784988252944	4.895168783855976	5.947843335447697	0.6916605856940717	0.5828292420153262	0.446609424958805	0.0194467708401643	5.9283965646075325	0.4502893809435813	0.9839660144103702	1.2309408105440434	13022.143630571758	1	0.4897947517119627	1	0	0	0	0	1	0	0	0	1	1	1	1	0	0	0	1	1	0	1	1	2	0	0	2.842828026001665	4152.755390334572	0.3087550476085184	27.81946073713741	13450	0	1
8d5135e2fbca454c96a4015259e74952	0.10576723477483078	1.3246977120338022	57156.986990736055	0	0.9096856601758246	16.513501668405898	16.739355852512055	0.7309002650042961	0.4490913195419098	0.7938449590081601	0.0242933575528606	16.715062494959195	0.3730781926916092	0.8934787295803525	0.8677917373144378	57156.986990736055	1	0.2640890428291705	1	0	0	0	0	1	0	0	0	1	1	1	1	0	0	0	1	1	0	1	1	2	0	0	2.445188455574941	28102.94754043409	0.3925102312974397	21.984380648754776	71598	0	1
a309475c3de64eaabf965f76e5fb67fd	0.059723861839409385	1.4074422281385828	11504.125159573328	0	0.9956361443770296	7.364579799732718	8.105638172744692	0.6210621589642639	0.5188831564202754	0.35522817360873	0.0232200613075729	8.08241811143712	0.411259412898013	0.8735708597873105	1.378800544509807	11504.125159573328	1	0.3774078417721881	1	0	0	0	0	1	0	0	0	1	1	1	1	0	0	0	1	1	0	1	1	2	0	0	3.4232722023168534	2753.50679933665	0.1826538507022653	35.105466480752675	15075	0	1
d05fcc3d13cb40059deb62fda284de0e	0.043123971189950185	0.2798247062776078	1409.5936511548932	0	0.0671283006710123	137.33960757211497	8.425402843693574	0.1545603320302707	0.1384037326901284	0.0690495516575787	0.0230708069492899	8.402332036744284	0.0362726151492491	0.3720749406463333	9.38555618321688	1409.5936511548932	1	0.1145508652196648	1	0	0	0	0	1	0	0	0	1	1	1	1	0	0	0	1	1	0	1	1	2	0	0	3.438632926812468	1659.5761147122373	0.1629911721383065	32.60206222781518	10182	0	1
30fc832d6e644cbe9d72d9c6a022f11d	0.06767989714674436	0.4782015686969426	36642.635610130565	0.0005899617591541	0.1018419193563324	2721.7196618882444	54.707909621129936	0.2361242341658588	0.211813324267928	0.1031666006276179	0.0330907374624665	54.67481888366747	0.0601659729836663	0.559232689905441	31.40232331028785	36642.635610130565	0.9999317225546456	0.2569865474984616	1.0000261508671804	0.0003574059006371	0.0001193836699159	4.540288725541078e-05	2.3568542737076996e-05	0.7538419114316384	1.5232920327526142e-05	0.0001876540476179	2.3567768359974475e-05	0.9999937728102376	0.9999932171020772	0.9999980278667604	0.9999966085510384	-0.0521105	0.0022202181126005	7.939250719169148e-06	1.000010345946877	0.9999765055963972	0.0002138849605204	0.0622357286423268	0.999988252519199	2.000020691893754	0.0002028198513978	1.7242857498121943e-05	2.275552118869947	50250.88447160439	0.4288862338187221	22.600153347763445	117158.00020483758	8.534636962624565e-05	1.0001877677824624
dfc32fb67135479c967854b42e8602b1	0.07193794519785209	1.2658432926594991	38603.752493718486	0.0002902481615322	0.3873746504849744	997.617093698062	59.61954933457836	0.4340118129755242	0.4319625019963895	0.1427125293576547	0.0329076982315757	59.58664163634678	0.2286072083279033	0.8046313015545021	13.97780427134247	38603.752493718486	0.9999664581481638	0.4590652776389907	1.0000262501038049	0.0002099848561104	0.000104994424751	5.2499209185620655e-05	5.2500207609718014e-05	0.3076857451039544	2.6250103804859007e-05	0.0002247957412208	5.2499209185620655e-05	0.9999912499653985	0.999989499958478	0.9999959615224916	0.999994749979239	0	1.1147431124355886e-05	3.281262975607376e-06	1.0000131250519024	0.9999737502706042	0.0002379207931231	6.56258835316249e-06	0.9999868749480976	2.0000262501038044	0.0002247957412208	2.6249854198834664e-05	2.435678265853807	23116.827021769022	0.3876970955920072	25.05789917226293	59624.00003354241	6.708370367241193e-05	1.000134169657532
05b77dbc365e42f2ba2e1158e1c3632f	0.05088096180982139	0.3229344413279497	1814.747452108606	0	0.0776743412115991	91.73871607924058	8.74004064768367	0.1914783529905401	0.1767419447573706	0.0838355207089156	0.0268315964744988	8.713209051209171	0.0413618698535058	0.4714727532882105	7.914975128085926	1814.747452108606	1	0.1856225974291959	1	0	0	0	0	1	0	0	0	1	1	1	1	0	0	0	1	1	0	1	1	2	0	0	4.0484825290581865	729.8535031847134	0.0893990082293867	44.16322403227708	8164	0	1
08f888f6ca58449eb3564357834a39a2	0.06248034930958069	1.0648965126198828	173.1202707597879	0	0.3909669065058597	36.44876441371898	6.271569217015957	0.3907254904932554	0.3594615789000982	0.1676755362877741	0.0316827942627562	6.239886422753201	0.1831156971691018	0.7022963367516453	4.575908726463205	173.1202707597879	1	0.3405537356935854	1	0	0	0	0	1	0	0	0	1	1	1	1	0	0	0	1	1	0	1	1	2	0	0	2.6344849953151663	83.18233618233619	0.2369867127701885	4.40783759872079	351	0	1
74ac2cf92565449c948f31d14c376fbf	0.05371738178437911	1.71707081687265	1567.1737734928065	0	1.1126558593766451	20.60773966413658	10.074170086561956	0.7788557542351668	0.6420389083148725	0.503828207489358	0.0214890633211858	10.052681023240767	0.4621712633242534	1.1688986811723194	2.856692274285408	1567.1737734928065	1	0.7597078409411571	1	0	0	0	0	1	0	0	0	1	1	1	1	0	0	0	1	1	0	1	1	2	0	0	3.725771461202134	151.0662598081953	0.1317055447325155	40.31045698227969	1147	0	1
5472c18c4c4f41f086a8ecec402b405f	0.06499206936378074	0.8840593259935825	13996.226214401257	0	0.1755771119577508	29.31549651792809	11.49849892885127	0.3142811622731352	0.3071055450883911	0.1183464748152644	0.0322684026117829	11.466230526239489	0.1134861192165567	0.5972823996998726	3.920279971758864	13996.226214401257	1	0.2579736160314856	1	0	0	0	0	1	0	0	0	1	1	1	1	0	0	0	1	1	0	1	1	2	0	0	2.618410107701169	12572.796701756177	0.3204648306720407	25.513255561014446	39233	0	1
7c9549089d464dbe8cfd4f3c4a18dd1f	0.06622000349214976	1.7151676870313364	3189.576822206162	0	0.8555879975002223	10.922037369051957	7.327237526649696	0.6620651773810384	0.587622901093408	0.3200473852678957	0.0226395948293295	7.304597931820366	0.3742767151295397	1.0357837154617089	2.298858785086298	3189.576822206162	1	0.6345176061150758	1	0	0	0	0	1	0	0	0	1	1	1	1	0	0	0	1	1	0	1	1	2	0	0	4.169676276020012	212.1725529767911	0.0713664826696236	31.63416685815347	2973	0	1
addb401ed9ed4ee69e3279654c91b4d2	0.06554044111030882	0.2924357278081829	1217.2266473072932	0	0.077302366243357	117.13293531478789	7.08297621645452	0.1729029964144476	0.1185603479676794	0.1034597464324855	0.0368082399886637	7.046167976465856	0.0380132016463033	0.3258073064194648	8.5578887233455	1217.2266473072932	1	0.0762549547472125	1	0	0	0	0	1	0	0	0	1	1	1	1	0	0	0	1	1	0	1	1	2	0	0	2.828192582245496	2914.2964158018663	0.2541463692161739	28.749745788889246	11467	0	1
ab43cd8ad6534df59953a9c788e468cb	0.06322276132052486	0.4776859045286791	1066.7792827978292	0	0.099551594922633	171.14934366162606	12.116192377322372	0.2264092444764153	0.2029318615085963	0.099348839701822	0.0369908606688738	12.079201516653498	0.0590651837099707	0.4611673184578481	8.366519367592174	1066.7792827978292	1	0.161414149629221	1	0	0	0	0	1	0	0	0	1	1	1	1	0	0	0	1	1	0	1	1	2	0	0	3.5159598236087977	726.6905901116428	0.1448745195597374	50.11956507914705	5016	0	1
bedde1dbcfc14961b017232f186edf56	0.026607484504598114	2.279729891183388	2789836.346969123	0.2437651330411555	0.5031495299556846	135.421282407474	978.1310600832004	8.76602887383448	15.774063459217643	0.1365252131046904	0.0165446795979265	978.1145154036026	0.3069005843402342	70.20711845872613	11.037010762663188	2789836.346969123	0.9512292574510856	4852.196220060703	2.892311675715696	28690.065199041543	769.2550597366868	23.07876387704645	19.51896550528288	0.0860557499717777	0.7390383537767099	0.4634557277923302	18.957885844582705	0.9560617827963952	0.9521805972240756	0.992564115836642	0.9884026584356812	-0.197679	0.3008238395890668	0.0074999454040117	1.4141719058691615	0.8970026655262751	0.5267203466638302	0.5349065035926761	0.9469914733661392	2.8283438117383235	0.4719821492316519	10.649432345582332	4.335324417886064	33.38162544169612	0.0589781368227846	27.31027981370725	538.3957597173145	7.520333628837917	9.229681978798586
c24ec896fa5f44f7a0aa4167ca873135	0.056795987559295553	0.2835663723764692	41951.30656728928	0.0011953415512379	0.0651568958893838	25978.548885797398	180.85370084330523	0.1720175926969173	0.1417886677519022	0.0862001089232111	0.0306413017387223	180.8230595415665	0.0350159513534594	1.019687561248047	147.19633315514938	41951.30656728928	0.9998512986588808	1.010172670366747	1.000531384779688	0.145944059774364	0.0207862391648079	0.0030366690690641	0.0029795611957883	0.0105140565196985	0.0005129424212788	0.0023914276450418	0.0029792965548367	0.9998982413424818	0.9998919911284756	0.9999728951999696	0.9999613101740226	-0.0199033	0.0021027720766431	0.0001010157425108	1.0002585203615737	0.9996818230003548	0.002550532276437	0.0272710859807709	0.9998408953686042	2.0005170407231474	0.0023914276450418	0.0015040575662131	2.73052430910804	12766.063523929908	0.3164067594599328	30.848701969973767	40341.000346989866	0.0012639847427514	1.001710164324485
6fe8202a508244aa863bf6b7b32c3135	0.07200625325701414	1.137337870805582	19855.80113065177	0	0.2982314742555615	68.26056946175763	21.32691908007941	0.3694547217063564	0.3576672532005354	0.1309018828502163	0.0534814739844697	21.27343760609494	0.1914697755955511	0.6332118069945882	3.8779210721685455	19855.80113065177	1	0.2644604011262302	1	0	0	0	0	1	0	0	0	1	1	1	1	0	0	0	1	1	0	1	1	2	0	0	3.44622291990806	9879.327295490802	0.1994977342034854	39.11536921926958	49521	0	1
766db2f42c4843688584d86f0a9a8816	0.08454324821247133	0.3798995029803234	5156.180279404682	0	0.085340870070113	80.1075624585784	10.088114391750084	0.2144433731483214	0.1531806696881724	0.121813242888533	0.0461562229027252	10.041958168847358	0.0456254142412436	0.3869918709285308	6.6869882929923845	5156.180279404682	1	0.1037767478775344	1	0	0	0	0	1	0	0	0	1	1	1	1	0	0	0	1	1	0	1	1	2	0	0	3.5714673721658663	5005.068372592872	0.1453736202792085	41.09960292175202	34429	0	1
fb31b1a391e84a739006f1f373770ee0	0.05549164094132605	1.785112053262345	30920.7349300436	0.0018425133346901	1.1702033917316397	827.4204516791405	63.46555014992568	0.824695561481323	0.6642283483016038	0.6264394915824915	0.0266767315010972	63.43887341842458	0.4938133579877488	1.356576887934205	17.333352182849396	30920.7349300436	0.9997619543566448	1.1601780837502584	1.0004218201645532	0.0023881752740016	0.0012645690834626	0.0007028552953363	0.0007030336075887	-0.000126562	0.0004218201645532	0.0040036314944736	0.0007028552953363	0.999835958824896	0.9998172112620268	0.9999426757212274	0.9999086056310134	-1.33152e-05	0.000238857528085	0.0001757584018971	1.0002109100822767	0.9994376721762914	0.0042848449375084	0.0001406265367876	0.9997187865569644	2.000421820164553	0.0040036314944736	0.0003514722257312	2.9351531461131755	5032.827282466373	0.2995373933142705	30.63854641130589	16798.000357100344	0.0002975517408333	1.0006546839661945
303b466bd2e0405bb7d14484817378d2	0.06329760604689892	1.6607372694220484	2373.697466411895	0	1.0408685496718166	8.58745756759479	6.951538359196844	0.7974766490152454	0.5681728291406359	0.6815943972001358	0.0260448910922074	6.925493468104636	0.4198593660239901	1.080547825755144	1.650408560796922	2373.697466411895	1	0.5316145980195842	1	0	0	0	0	1	0	0	0	1	1	1	1	0	0	0	1	1	0	1	1	2	0	0	4.279538869288103	132.90555828824398	0.0653741063887083	40.83994997446221	2033	0	1
702075495a1249e5bc0998b17b7dbe3e	0.08418002951920847	1.631640594006465	23927.541685426862	0.0008844319240392	0.9942172866264302	214.8278576120367	31.15713208277083	0.9211385404510448	0.5146391243960327	0.9881298901156228	0.0199069161137581	31.13722516665707	0.3860825359906945	1.1668133083180448	6.448355953822187	23927.541685426862	0.9998862084664586	0.5129570857638194	1.0000859120634744	8.587974052723187e-05	8.58878191882987e-05	8.590398149212314e-05	8.591206347440889e-05	-4.29581e-05	8.591206347440889e-05	0.0012788238548409	8.590398149212314e-05	0.9999570439682628	0.9999570439682628	0.9999828175873052	0.9999713626455082	-3.90441e-06	7.296870000214468e-05	8.591206347440889e-05	1.0000429560317372	0.9998281879960244	0.001364735918315	4.295805233634672e-05	0.9999140879365256	2.000085912063474	0.0012788238548409	4.295401124163301e-05	2.934701901734577	5145.2150782361305	0.2927576146933787	26.94026585837166	17573.000113798007	5.6895766770738696e-05	1.0001706970128024
7d81c373a4ba4f4590ac0767e49f2eb5	0.047170405608336546	0.4689837065603094	4051.753283886526	0	0.1142264865481492	65.65575269355527	9.423129328490802	0.2206031016126837	0.2152344413686216	0.0850927436354439	0.0223325283227227	9.40079680016808	0.0641955878108496	0.4915062780981349	6.331109735956206	4051.753283886526	1	0.192912692968745	1	0	0	0	0	1	0	0	0	1	1	1	1	0	0	0	1	1	0	1	1	2	0	0	3.5142244642332554	2938.814929644646	0.1752214959244363	35.63969272035224	16772	0	1
b2e60bd220764312b0638cc7131c8d86	0.053850007092324875	1.3815803051727271	247.7120323636597	0	0.632897041639045	5.49733987737453	3.333003025518296	0.4931355562046706	0.4715252909422071	0.1916333051629558	0.0340602376771902	3.298942787841106	0.3151014677508739	0.7772873913115103	1.6732211659744096	247.7120323636597	1	0.360993011898563	1	0	0	0	0	1	0	0	0	1	1	1	1	0	0	0	1	1	0	1	1	2	0	0	3.6967878827361353	44.32682926829269	0.1081142177275431	22.89342058298632	410	0	1
4d671016ec70470b979e5c3191b57988	0.03840879329785322	0.1109245862134901	69.64509536275311	0	0.0242800892875021	140.492638300108	2.011122492467851	0.0738677747405485	0.0371849915156721	0.053051713340221	0.0267292114260621	1.9843932810417888	0.0119681943963839	0.1158073456151689	9.451786331867767	69.64509536275311	1	0.0079548931533107	1	0	0	0	0	1	0	0	0	1	1	1	1	0	0	0	1	1	0	1	1	2	0	0	2.7860467308965484	1345.7429231658002	0.2591455657935297	30.95330665727157	5193	0	1
986fd0c7b3a345feadd9bb4669492c86	0.042432563100867925	1.3390721240995218	11754.116408448112	0	0.3845439777353793	21.318347338592734	11.924077936330674	0.4228422123412325	0.4825275765955061	0.0939480669890855	0.0181367230702664	11.905941213260409	0.2559450701677958	0.8214306779600586	3.283303832896268	11754.116408448112	1	0.4959528221562935	1	0	0	0	0	1	0	0	0	1	1	1	1	0	0	0	1	1	0	1	1	2	0	0	3.0117228825206075	4580.522388059701	0.2629461761228301	30.98939704023379	17420	0	1
9de6ee61c32040c39935d46371712cbb	0.05039329017077438	1.3360361101631395	1385.8610927100103	0	0.3893885819284828	41.49921923008412	11.694218603868263	0.4649365384455318	0.4575548387414604	0.1803363935431157	0.0265096492664957	11.66770895460177	0.2183508499636135	0.8636484468690592	4.37514716498707	1385.8610927100103	1	0.5297226549976247	1	0	0	0	0	1	0	0	0	1	1	1	1	0	0	0	1	1	0	1	1	2	0	0	4.36969401275577	101.81377825618944	0.0547975125167865	28.121282766403912	1858	0	1
003bb1767d31472abf8e0718a4c59e8d	0.08196406915205917	1.6736542617250103	12324.838201561774	0	1.026012239690724	5.857530849558761	7.656181862834232	0.8745037066775183	0.5334172619541465	0.9065609343207676	0.0282909306757476	7.627890932158484	0.411552688813704	1.0935673726130444	0.9183302889636412	12324.838201561774	1	0.4311328654510777	1	0	0	0	0	1	0	0	0	1	1	1	1	0	0	0	1	1	0	1	1	2	0	0	3.4874520771514765	1787.5684067533475	0.1734492923300356	29.78095957471977	10306	0	1
92f719820b694a2db073f88d3f698133	0.05352623934075069	0.6030152334538957	23432.963572991324	0	0.1580443701383523	47.41564514352133	13.21269549220328	0.2602767632214727	0.250396067534432	0.1003441821605782	0.0235378402137308	13.189157651989548	0.0874999489591112	0.5316660914828211	5.172966948236996	23432.963572991324	1	0.2149248393595729	1	0	0	0	0	1	0	0	0	1	1	1	1	0	0	0	1	1	0	1	1	2	0	0	2.919167803065463	24290.786342416675	0.2930166388305851	29.30210195683935	82899	0	1
c8116e9b872d43b7a1697606941e97d1	0.07973360814137817	1.5266006242321402	24431.335964108708	0	1.0205264803400698	3.532645747288879	4.645187107042551	0.8181461850225094	0.5133547635444188	0.9037860978962966	0.0275210589687797	4.617666048073772	0.4134657223123124	1.017676245792786	0.590566246748606	24431.335964108708	1	0.3663017611840129	1	0	0	0	0	1	0	0	0	1	1	1	1	0	0	0	1	1	0	1	1	2	0	0	3.487020147479834	4152.703009749894	0.1760365837113138	35.94429925815125	23590	0	1
decd2c58ace7422183136a83fd6b9798	0.06002888753894978	1.5369495179886428	573.5967685395169	0	0.747631954030306	10.34471897007355	5.686851641959222	0.5957888707831756	0.5367215255601251	0.2692680844366963	0.0242705740084823	5.66258106795074	0.3299602196562818	0.9444910818204902	2.3042423304249517	573.5967685395169	1	0.5370990250893485	1	0	0	0	0	1	0	0	0	1	1	1	1	0	0	0	1	1	0	1	1	2	0	0	4.3391956655722765	37.93312597200622	0.0589939750731045	28.223152069541836	643	0	1
73095dbb5fe14944a550c8ebdcbdc1a2	0.04801920421071193	1.188615597980819	32430.50079299978	0	0.1565487815689622	62.026418884202286	23.12841688155666	0.3699858199889279	0.4442529302567101	0.0826531552966221	0.0233264690141848	23.105090412542477	0.1522907264606956	0.8619650925500477	5.457135715866887	32430.50079299978	1	0.6060943137819329	1	0	0	0	0	1	0	0	0	1	1	1	1	0	0	0	1	1	0	1	1	2	0	0	3.0157439613416948	10974.923663772366	0.2514358556615814	30.83780377517809	43649	0	1
84813ea3b91a42bba8babc3ea5923198	0.04699317414760694	0.2389066242854693	45345.13566581249	0.0026114236346099	0.0552926040316656	7672.4397445078575	190.8636890164584	0.1870686259799045	0.1945897555773697	0.0695373301822982	0.0262282896174912	190.8374607268409	0.029572439694834	1.9918711272598832	82.98698589951864	45345.13566581249	0.9996500590585626	3.932555916785548	1.0003393436842056	0.0793856954859535	0.0119434931356803	0.0019071933216628	0.0019075044649566	0.6153524748916787	0.0003393436842055	0.00102452880935	0.0019071933216628	0.9999429601230844	0.999933775831232	0.9999814177638894	0.9999745413221168	-3.30006e-06	6.009977668527131e-05	4.980723907532304e-06	1.000169671842103	0.99985850061943	0.0010952874939736	3.538274001963903e-05	0.9999292413153764	2.000339343684206	0.00102452880935	0.0009536744466548	4.057784553442604	1031.8698923790355	0.0902852298870448	38.54998803762376	11425.000524980313	0.005074044127055	1.0068247440720972
cb67bd2d961043cba58592d02a20f9d7	0.03491662417465301	2.2267739276520677	5671.797779536735	0	1.1193122500926551	13.440866297002374	11.572503113026256	0.8130165452548692	0.8174430090265608	0.2915222164304212	0.0155399694034553	11.5569631436228	0.4933835179313884	1.418697732945651	2.6686598164908486	5671.797779536735	1	1.351707354606967	1	0	0	0	0	1	0	0	0	1	1	1	1	0	0	0	1	1	0	1	1	2	0	0	3.427742580302397	537.2370475514549	0.1906448004086071	33.08998927607729	2818	0	1
9ef8fa67d2524a8da5e0339ad306bcc2	0.1321195295241985	1.2990769377560902	93965.5246448201	0.0004209835792391	0.8811647875650328	1428.1521151342215	64.7764158903402	0.643815757671972	0.4470925497387757	0.458164458239056	0.0593100889872228	64.71710580135299	0.3631535815329306	0.8625705604865463	16.047878574064548	93965.5246448201	0.9999524923064091	0.3295292419913392	1.0000205010344312	0.0001030087591219	5.586148208862092e-05	3.2288192307306106e-05	3.228876677895946e-05	0.1538394112248511	2.0501034431065382e-05	0.0002606821957819	3.2288192307306106e-05	0.9999917141048424	0.999990928256019	0.9999973151725076	0.9999954641280095	0	1.240620173042874e-05	1.0186768626658066e-05	1.0000102505172153	0.9999707860402468	0.0002752893640386	7.303656464878988e-06	0.9999853928317428	2.0000205010344305	0.0002606821957819	1.614423977156639e-05	3.2915281036732766	27621.7984448861	0.2187120303174847	36.56278042858014	126287.00011085332	4.7507568198367545e-05	1.0001108533331222
b017fd131a594f118b3e8ac942f5160f	0.08843163467058088	0.6744434460382714	22386.20243586148	0	0.195087861176624	56.83341300919732	15.40414579142586	0.3021127081532147	0.2418921114185828	0.1488935539176537	0.0455648441524922	15.358580947273367	0.1017946815042055	0.5157661449767464	5.016303416307354	22386.20243586148	1	0.1747426278765048	1	0	0	0	0	1	0	0	0	1	1	1	1	0	0	0	1	1	0	1	1	2	0	0	3.236077973603795	18163.80057988925	0.2158400144959152	37.016648267177054	84154	0	1
dc6a80bcb39346f4a87c16560ee20d71	0.03018210529434621	1.1509774706689186	2349.7258348117457	0.0106483483728803	0.3293071197624103	270.81826333388784	32.55204117418727	0.4885520573695068	0.5757176228478658	0.119600885251197	0.0143560381690855	32.53768513601819	0.1814631896498714	1.473652094044156	13.100857645557284	2349.7258348117457	0.9981532795090902	1.932967381520748	1.0019585108441258	0.0019428736068142	0.0019467628808658	0.0019545895035479	0.0019585108441258	-0.000980237	0.0019585108441258	0.0204106721887237	0.0019545895035479	0.9990207445779372	0.9990207445779372	0.9996082978311748	0.999347163051958	-0.000123854	0.0016642381264315	0.0019585108441258	1.000979255422063	0.9960888603226152	0.0223691830328492	0.0009802367619133	0.998041489155874	2.001958510844126	0.0204106721887237	0.0009782750869184	4.409068841151883	57.1460258780037	0.0528151810332751	35.168275357812774	1080.0018484288355	0.0009233602454549	1.002772643253235
f63a24c7a42046b09acac13c197a0ff9	0.08589285129038919	1.6030869448683944	18168.89117351405	0	0.99245470589592	6.238597692378024	6.604323062029894	0.8862092877036587	0.500581881771028	0.9521508472585816	0.0263975928672452	6.577925469162649	0.3828389469513731	1.086079344297456	0.8837630740055903	18168.89117351405	1	0.3942014404973661	1	0	0	0	0	1	0	0	0	1	1	1	1	0	0	0	1	1	0	1	1	2	0	0	2.8836965004086115	4748.975978705447	0.3083150021882391	28.9991788112887	15403	0	1
0ccd9f4fff574725b875db5484913619	0.1026367735124955	1.1477604989994663	20386.63393080085	0	0.6708892679676293	8.491878177696076	8.879990424506158	0.4665011107008883	0.3675994151926285	0.2352673289320283	0.0662811895953236	8.813709234910833	0.2781658677570542	0.6392622636463922	1.3981201434178696	20386.63393080085	1	0.191032955437147	1	0	0	0	0	1	0	0	0	1	1	1	1	0	0	0	1	1	0	1	1	2	0	0	2.6697436690061798	17536.634413775133	0.3515271396110235	26.267515745606723	49887	0	1
1cd0ffc7bac948cd8baaa40231f00eac	0.032388558006975744	1.4522769617446336	56856.65385537686	0.0003437027097534	0.7527840652115347	1265.2972511022465	54.2301401487575	0.886774960466492	0.4361339573734026	1.0144547291754502	0.0253767618852398	54.20476338687226	0.3315616635905729	1.07089316546416	14.386298289048831	56856.65385537686	0.9999596603400798	0.3604423413275004	1.0000299427992234	0.0002395216653814	0.0001197634236012	5.9884302879452765e-05	5.988559844689886e-05	0.3076848219115281	2.994279922344943e-05	0.0002536051279605	5.9884302879452765e-05	0.9999900190669256	0.9999880228803106	0.999995393415504	0.9999940114401552	0	1.2715593075668025e-05	3.742849902931179e-06	1.0000149713996118	0.9999700576866144	0.000268576527572	7.485780779578135e-06	0.9999850286003884	2.000029942799224	0.0002536051279605	2.9942475331587905e-05	1.7954121438989474	27911.84658517891	0.5629885551086956	14.989196554610128	49576.00004034047	8.067931984051001e-05	1.0001613618943883
54b4098a4ead4c4aa9a1c9d3a30a2de3	0.04744819559254904	1.4342686089634964	57494.28120982296	0.0009856366199335	1.0082740500374752	1965.8204883820672	62.66718352688014	0.8101631393957652	0.4748424645249418	0.9217896427656554	0.0188529959487139	62.64833053093143	0.3815157949741575	1.0738208499474635	26.211859229186448	57494.28120982296	0.999879671101273	0.4967269053462909	1.0000529500849356	0.0003233340449676	0.0001513392176004	8.023379900904837e-05	6.700094349760836e-05	0.4285562486525537	4.63314803691588e-05	0.0005831881830851	6.699715935307922e-05	0.9999802791703368	0.999978901206128	0.9999942538808716	0.999989450603064	-0.0348685	0.0019926090218109	2.8245700131765424e-05	1.0000248203913262	0.999928009373778	0.0006237433096401	0.0444274115276382	0.9999640032511948	2.0000496407826525	0.0005877465608356	3.680868562666417e-05	2.416060214485127	19976.711397685565	0.4006480294756536	22.52235952917885	49855.00028078057	0.0001203280942604	1.0002807805699845
5adfa4dd43424ee0ad1dd7ddd7ba9bf8	0.08042892710022134	0.2714656401345667	3481.5352243013954	0	0.0536659237918938	86.33237623266045	6.358991674014379	0.164429461613722	0.0993396042289708	0.1045586322179348	0.0662811895953236	6.292710484419056	0.029114019079981	0.2650049799930321	6.768825116553124	3481.5352243013954	1	0.0431905915745288	1	0	0	0	0	1	0	0	0	1	1	1	1	0	0	0	1	1	0	1	1	2	0	0	3.3342549697920867	10088.792758446798	0.2035056532213171	31.049749621556305	49575	0	1
663ac20c82384858976acbe224c0807f	0.031128868208732584	1.828477357988964	2799.2768560738887	0	1.1475166184278311	12.211585016620235	8.581467272520689	0.7701431622279514	0.6492849916577895	0.5042470405260959	0.0138522712564056	8.567615001264283	0.4814136824797863	1.1344707320477916	2.0495550841567303	2799.2768560738887	1	0.6939033515465837	1	0	0	0	0	1	0	0	0	1	1	1	1	0	0	0	1	1	0	1	1	2	0	0	4.075459864813319	177.07080459770114	0.0814118641828511	34.47270836305985	2175	0	1
b9802729f18d47f6b9f68a4c53ae14d2	0.04201235847856446	0.39024456068272	3327.684841434131	0	0.1052987598053779	89.38946585639053	8.435622829317873	0.1901725627634465	0.1749995618986745	0.0819381304049746	0.0196254754560083	8.415997353861865	0.0555648679743949	0.4234304716259895	7.471454122251924	3327.684841434131	1	0.1431277606733909	1	0	0	0	0	1	0	0	0	1	1	1	1	0	0	0	1	1	0	1	1	2	0	0	3.659414948947102	2689.420797413793	0.1449041377916914	39.40868566996136	18560	0	1
c0c2fe5f2d8545aabd013d765056149d	0.04861225334402567	1.503180772712229	13504.412025355106	0	1.0431326216217358	4.627538046422351	5.571547304083748	0.7567315660726854	0.518704175697885	0.7922290000345557	0.0247887960116749	5.546758508072073	0.4162648360896627	0.9788950085842713	0.8499152125689806	13504.412025355106	1	0.3855927747403812	1	0	0	0	0	1	0	0	0	1	1	1	1	0	0	0	1	1	0	1	1	2	0	0	2.448701301642719	5797.669836088839	0.4113864923074461	24.11832791173336	14093	0	1
d7751cce683d42c98124000ae5edc0a0	0.05019049139951747	1.0801626048060475	13362.72318935434	0	0.2945056761592619	32.40243604446894	12.739182290785326	0.3646387587455717	0.384388563916087	0.1065308602666908	0.0249195430965359	12.71426274768879	0.1776720600605833	0.7125458154867562	4.0651022784704045	13362.72318935434	1	0.3747601147881751	1	0	0	0	0	1	0	0	0	1	1	1	1	0	0	0	1	1	0	1	1	2	0	0	3.909612688884886	2701.3313955697404	0.1026380711869653	35.59314042466408	26319	0	1
1074c3b260db42c6a6098807a5d27966	0.05872106072071635	0.2286559122809046	5861.019185798501	0	0.0395442956964372	90.45090584807542	6.160907334796874	0.1436564431669004	0.1082528357484114	0.0790571921911663	0.034479295154906	6.126428039641968	0.0230330955977117	0.2936766870629173	7.724662950708831	5861.019185798501	1	0.0656088228608857	1	0	0	0	0	1	0	0	0	1	1	1	1	0	0	0	1	1	0	1	1	2	0	0	2.971545829313876	17638.081919449065	0.2595476833799176	33.322410494254626	67957	0	1
d62b8b15c0044c169250f662bf327c12	0.06705163249723736	1.3820053116357855	21411.179318974653	0.0025598784976634	1.0046529030059563	2830.924637020036	69.39789922870129	0.7247894574407995	0.4924040438121621	0.8059848129182521	0.0256386280888974	69.37226060061239	0.4070839936960009	1.1086544869652222	38.21491479384994	21411.179318974653	0.9996556144474132	0.7037950138507915	1.0002013166637034	0.0009533733083246	0.0005209061475072	0.0003047024691219	0.0002857427637942	0.0512188730102067	0.0001870646114077	0.0020389214896749	0.0002857020799038	0.9999229140530274	0.9999163355095348	0.9999759800998846	0.9999581677547676	-0.0437901	0.0031549007090243	0.0001007212280695	1.0000982829898026	0.9997150781598132	0.0022499289635495	0.0513461680359056	0.9998575237806868	2.0001965659796053	0.0021122034283354	0.000147611308229	2.304567870524324	7648.134213547646	0.4390432958408523	22.660883856791287	17414.00080367394	0.0003443789618541	1.0008036739380024
fb6b87086f074318a4633423dcb4b1ea	0.03659320570171519	0.5230124678438864	510.17744497756905	0	0.08534934316663	57.85817510858956	7.69378620860937	0.2084313714848609	0.2356200749336805	0.0575027103486779	0.0245397769623137	7.669246431647056	0.0619767046608724	0.4928911040640813	5.6777530688915725	510.17744497756905	1	0.199498003846449	1	0	0	0	0	1	0	0	0	1	1	1	1	0	0	0	1	1	0	1	1	2	0	0	3.5727785720129117	312.9695238095238	0.1490331065759637	35.589193650793646	2100	0	1
06fc78e34707416ab55230c942ab2ae3	0.07902356269580925	1.8514447494148336	31657.2640601684	0	1.105683624701129	29.99853389144328	18.49101137698215	0.9702079815277924	0.5958313412496109	0.9914814034029842	0.0314578434332721	18.45955353354888	0.4357002081274368	1.268693134161415	2.649265032587898	31657.2640601684	1	0.668278741248081	1	0	0	0	0	1	0	0	0	1	1	1	1	0	0	0	1	1	0	1	1	2	0	0	3.0206166505508487	5505.970408785845	0.279945617692996	31.857192327350305	19668	0	1
828ef709530440e0a317fd600d053435	0.06427038917615549	1.0142927831414694	11905.410435488007	0.0012304646137903	0.2519734575467468	159.57614029766694	25.496064135040093	0.4148048911947456	0.4254141462702655	0.1447283849434484	0.0327996214010934	25.463264513639	0.1491041223494166	0.9876505142731198	9.397215930148798	11905.410435488007	0.9998361461587276	0.8033904405848734	1.0001825689391144	0.0001823870944066	0.0001824325259203	0.0001825234601375	0.0001825689391142	0.2306779349284459	0.0001825689391142	0.0024552199177496	0.0001825234601375	0.9999087155304428	0.9999087155304428	0.9999634862121772	0.999939143686962	-9.12053e-06	0.0001550694348374	0.0001825689391142	1.000091284469557	0.9996349303402364	0.0026377888568637	9.129584078487912e-05	0.9998174310608856	2.000182568939114	0.0024552199177496	9.127309981294784e-05	4.4606787588828265	625.0775092175338	0.0512148717097528	37.0089573097573	12203.000163867267	8.192692063631653e-05	1.00024580090127
904444f2bb9148409415b9dbcbd52cf5	0.07455803280090689	1.1754662075216804	37552.63754796526	0.0006890970930017	0.1763201389479463	4321.777817502867	95.17984732442092	0.3699514374959059	0.3979383041295955	0.1067991464350085	0.0662811895953236	95.1135661348256	0.1643067905655551	0.8714832255396032	39.770696948785485	37552.63754796526	0.9999191044867418	0.6226189462916237	1.0000839661904095	0.0010151698463046	0.0003704924668831	0.0001556023334634	0.0001556108892738	-2.60555e-05	8.396619040963996e-05	0.0009577079058735	0.0001556023334634	0.9999669724921532	0.9999651813746816	0.9999928693274224	0.9999852537533142	-2.55949e-06	5.1031981443971625e-05	4.94705946602084e-05	1.000041983095205	0.9998798359376908	0.0010177925299946	3.0043269766779434e-05	0.9999399153758785	2.00008396619041	0.0009577079058735	7.780330568431575e-05	3.73855268539791	6528.3870361007175	0.1320333104682115	33.54945887417888	49441.00012134695	0.0002022383741152	1.0003640408534735
94e3f1ad24f54c1fa140ac3c0593a379	0.09106072166921717	0.7123534647140624	31550.35131855015	0.0029440566170928	0.1746616403157697	3281.424692972319	81.02135496371714	0.3333015151604701	0.2974123298070746	0.1419726053587545	0.0448750802263373	80.97647988349081	0.098995999375984	1.0078951536835543	45.93089948915849	31550.35131855015	0.999613677953866	0.9047627408105304	1.0005436501967675	0.0077003648196129	0.0028520419007239	0.0011489594337066	0.00112454326158	0.0101305019743173	0.0005312965488899	0.0045169224833279	0.001124258585834	0.9998139522351804	0.999793676396824	0.9999492173049286	0.9999113128443604	-0.0146125	0.0026139617089136	0.000194237354354	1.0002687366864145	0.9993765799693772	0.0048387136901106	0.0273418704980198	0.9996882310374968	2.000537473372829	0.0045184365000723	0.0005683756738216	2.971936471518233	8816.824715049263	0.2838825653631677	32.043068819605814	31046.001609891173	0.0006438527985593	1.0012879129370855
cc96624f93d34e79b0b56968a78a05e7	0.10413986848127112	1.488463956225121	15192.172821933294	0	0.8805776958186059	34.27763751680626	16.465937688251568	0.6325424244980423	0.5210117951281954	0.3215280717292714	0.0482833691853232	16.417654319066244	0.3680401440929755	0.9357238330866784	3.1816832881665302	15192.172821933294	1	0.4754691730165643	1	0	0	0	0	1	0	0	0	1	1	1	1	0	0	0	1	1	0	1	1	2	0	0	3.2003039877081463	4048.8797763817647	0.2333513789626975	32.409843749261455	17351	0	1
ee8e3012a00549999f31d4a93385430d	0.04470881522052759	0.979626049713123	126.3347325229626	0	0.3092912572253458	14.086607981466845	4.251702233716619	0.3743510646532527	0.3806857961838016	0.1289917658645136	0.0306651348593158	4.221037098857304	0.1694638886549659	0.7108719505592062	3.087536061779444	126.3347325229626	1	0.3652002104848267	1	0	0	0	0	1	0	0	0	1	1	1	1	0	0	0	1	1	0	1	1	2	0	0	4.178908591264219	15.752	0.063008	23.5594	250	0	1
58e74e6a7737433baaecd6d4a685b764	0.06185690944362206	0.1547103733850154	475.47641647436217	0	0.0285799857271163	111.09892791280964	3.4718880743756366	0.1131112272359259	0.059792152875496	0.0788505380316379	0.0360799270840596	3.435808147291577	0.0143549147772899	0.1962700919583923	9.03073426906288	475.47641647436217	1	0.0257277992705384	1	0	0	0	0	1	0	0	0	1	1	1	1	0	0	0	1	1	0	1	1	2	0	0	2.568194018575249	4103.376569715629	0.3324456428514646	26.370001535087223	12343	0	1
a0d6eeaa27bf451eb3027658d44e8f7b	0.0642264759520753	1.2461996876527333	4326.964308057341	0	0.4675611660764428	12.653254376929477	6.972968176776859	0.4294286089169115	0.4173715925928604	0.1494421114245955	0.0394077615767934	6.933560415200065	0.2481251910724517	0.7175868551522493	2.5387141126517214	4326.964308057341	1	0.3305219645309814	1	0	0	0	0	1	0	0	0	1	1	1	1	0	0	0	1	1	0	1	1	2	0	0	3.3002679457173603	1640.9778650481971	0.1952847631855524	33.02742180688969	8403	0	1
fcf23916403645eb9971963d6cfb3cb4	0.049104643849903075	1.422773509451395	449.4893399006613	0	0.6196473616783879	19.37053163512473	6.816770536168009	0.5171882624902038	0.4830402449904608	0.2052738888238713	0.0243386060753088	6.792431930092699	0.3001833087404974	0.857707273742927	3.049362070737763	449.4893399006613	1	0.4681780685738882	1	0	0	0	0	1	0	0	0	1	1	1	1	0	0	0	1	1	0	1	1	2	0	0	4.126135763056134	38.86252045826514	0.0636047798007612	20.17398431912483	611	0	1
011bb467b091439ab2aff9713a61db73	0.031704206520751135	0.7905846610376237	63.97814479427366	0	0.1615082349193465	11.034756219147797	2.326740746611237	0.2507998301550028	0.2536480946582555	0.0953858246823158	0.0198887831491121	2.3068519634621247	0.1074467216089539	0.4610335953709988	2.751784362017317	63.97814479427366	1	0.1496514212549315	1	0	0	0	0	1	0	0	0	1	1	1	1	0	0	0	1	1	0	1	1	2	0	0	3.62080729939894	28.21594684385382	0.0937406871888831	10.124303263760886	301	0	1
1aee8673c8ff4b6cbbe34937aadde6e6	0.04127721913845775	0.2048525893899634	658.7811938464614	0	0.0474146733470298	159.44518447045522	7.700503505998832	0.1308678793706936	0.1101681450380955	0.0653289245466177	0.0224782755076518	7.678025230491181	0.0250173495793719	0.3237045964980011	10.243180064557274	658.7811938464614	1	0.0876582639429513	1	0	0	0	0	1	0	0	0	1	1	1	1	0	0	0	1	1	0	1	1	2	0	0	3.3012174725710097	1178.052966438683	0.1873791898264168	36.55376465265504	6287	0	1
209c5de7283e456f88273c7896d43905	0.046027463989774406	1.1272032507524703	15273.199530305275	0.0022378026070866	0.2789453216999495	1272.360742687992	53.24576970837821	0.3617143978048857	0.3926220785809337	0.1005983426095686	0.0203814538684828	53.22538825450973	0.1852462191979824	0.8692168564986154	24.03922892308255	15273.199530305275	0.9997032249594378	0.6247006380419834	1.0005072163660844	0.0025417312353717	0.0013287993619135	0.0007653374796134	0.0007274894696698	0.0254793343171803	0.0004881677492519	0.0050661740463454	0.0007272485007818	0.9997958030787768	0.999779848297416	0.9999382966708984	0.999889924148708	-0.0194403	0.0031534398264116	0.0002787612438863	1.000248846028834	0.999263160781824	0.005450134661525	0.0273693478847476	0.9996314931109568	2.0004976920576683	0.0050816277724827	0.0003732067373208	3.297237401566071	4078.250358644571	0.2017437723791526	32.54394537475539	20209.000692555037	0.0002967701463533	1.000692555033391
004c7ba49240479b98f6875a3e2ef27a	0.042608458022701454	1.0417919382480374	12986.333053786848	0	0.2340068586034787	38.00793945955236	11.961942000931764	0.3449140043437965	0.3820856057914131	0.091593277209297	0.0179208844743376	11.944021116457426	0.1554704211050899	0.7263899304991921	4.5273194646241866	12986.333053786848	1	0.4086766607381486	1	0	0	0	0	1	0	0	0	1	1	1	1	0	0	0	1	1	0	1	1	2	0	0	2.4699049565927007	9139.689338534048	0.3713509401322138	24.55059260169645	24612	0	1
b52646044b634b98a753568d660ca24d	0.03237560813509168	0.2668164798463352	10520.197921444304	0.0037969009933294	0.0636091006284872	4347.870989510827	88.21996379125514	0.17168826922518	0.1883464307180448	0.0549949596171187	0.0206782482148028	88.19928554304033	0.0360463572217279	1.1808162827598496	59.93425098632792	10520.197921444304	0.9994699529792748	1.364850231841252	1.000385666471614	0.0081408223871207	0.0025606216903393	0.0008729702523318	0.0007437115908455	0.3495731770477552	0.00033171565318	0.0026696567746478	0.0007435125050379	0.9998865408459252	0.9998753417671764	0.9999676565882532	0.9999455309453325	-0.0465994	0.004827895683158	0.0001248549802912	1.0001766479902767	0.9996184995572772	0.0028604437273767	0.0544782351589533	0.9998092130472708	2.000353295980553	0.0026696567746478	0.0004041704607943	2.8829612493869567	1831.749635520212	0.2427766249861116	29.441077519859853	7541.000795228628	0.0013250999854638	1.0023856858846918
2f3ea30c87dc4606b44742cbad82f2f3	0.06866418593332452	1.5502699205778323	14715.993489849005	0.0010309242719236	1.016585240005767	146.4853295743464	25.366116904125622	0.7576869739348072	0.5177951287025189	0.7222408802741503	0.0057706724693546	25.36034623165627	0.4117305020370183	0.9957795681317588	4.506422955325725	14715.993489849005	0.999865247271869	0.4174873978381868	1.000054309158491	5.429206649499564e-05	5.42963386508034e-05	5.4304884986046286e-05	5.430915849096568e-05	0.307665152044644	5.430915849096568e-05	0.0008188918816813	5.4304884986046286e-05	0.9999728454207546	0.9999728454207546	0.9999891381683018	0.9999818969471698	-2.43671e-06	4.6126856379054176e-05	5.430915849096568e-05	1.0000271545792454	0.9998913880932754	0.000873201040172	2.7155647663699208e-05	0.9999456908415087	2.000054309158491	0.0008188918816813	2.7153510869252997e-05	2.9696709287149488	4165.366956404555	0.2806661920628364	28.155365001214207	14839.000134761807	6.737636406547727e-05	1.0002021427127552
3cdeee48a797470695092cbd0983604f	0.03361855166495495	0.7695950019416659	125.82781529044384	0	0.2291631333596554	26.978109260464663	4.5893055737936495	0.2856506558668895	0.2773593913995683	0.1225672971163195	0.0161349865441197	4.57317058724953	0.1181160795037601	0.5466977420087299	4.089597777756791	125.82781529044384	1	0.2172821239202597	1	0	0	0	0	1	0	0	0	1	1	1	1	0	0	0	1	1	0	1	1	2	0	0	3.235787205747471	72.82422802850357	0.1729791639631913	15.607088653302563	421	0	1
5b39c171b5e94366aa197bcecb499176	0.06710303182761929	1.4193482985675794	20809.6349298638	0	0.9171639199609836	5.998187085873941	6.538628063367569	0.7226356255912265	0.4709918565108667	0.6952118282624433	0.0076522730374846	6.530975790330085	0.3677963577391987	0.921802407590034	1.0359231923000043	20809.6349298638	1	0.3275174312651597	1	0	0	0	0	1	0	0	0	1	1	1	1	0	0	0	1	1	0	1	1	2	0	0	3.09256873151419	5706.329930583912	0.2330065304444226	33.47401302620832	24490	0	1
7f574921de8b4c2987d397fd595f8fe1	0.0443404911288282	0.3287882232931628	14155.745899972484	0	0.0688261572105634	61.577696953002985	8.04320047538621	0.1671006596988773	0.1556307647043012	0.0710586099491281	0.0061975854922111	8.037002889893998	0.0406073662050383	0.3685735656062682	6.282171589256616	14155.745899972484	1	0.1079238427919181	1	0	0	0	0	1	0	0	0	1	1	1	1	0	0	0	1	1	0	1	1	2	0	0	2.394892663889641	39454.29060304787	0.3786254904134953	25.096116975268245	104204	0	1
890a1cecef914c13b67f557745242d0c	0.05640627127556564	1.1576136813180138	26604.364399280406	0.0008022541136187	0.427003781291331	4157.355947073227	77.11416638317469	0.4002689997845294	0.3876164685901486	0.1434571609329738	0.0087488352278695	77.10541754794683	0.223151511404492	0.7970937526638112	41.40392524811205	26604.364399280406	0.9999044764714836	0.4751431783471694	1.000042909366892	0.0008347207933253	0.0002865483402073	0.0001038228668749	0.0001038272486806	0.5384522671647642	4.290936689220096e-05	0.0003758977184056	0.0001038228668749	0.9999861600517774	0.9999846371047328	0.9999956125490927	0.9999931586375296	0	1.9197797125799496e-05	1.3578534919962574e-05	1.0000214546834458	0.9999547946382052	0.0003985011247013	1.1301989883892072e-05	0.999977396593704	2.000042909366892	0.0003758977184056	5.191252888891666e-05	2.6359961790647737	13518.82165118334	0.3228529518110319	27.95889480086245	41869.000143290425	0.000238808250954	1.0004298712774342
d7b0bc0f809d48949d0c55c860fd2e99	0.04751940686106558	1.0973351692897384	72196.62260616837	0	0.1298496910029783	75.70898984802527	24.873661857897275	0.3548070155554526	0.4298152205763447	0.0799412771658558	0.0219134214197821	24.851748436477493	0.1332691755875051	0.8745763885524053	6.277827655081232	72196.62260616837	1	0.6389958411260005	1	0	0	0	0	1	0	0	0	1	1	1	1	0	0	0	1	1	0	1	1	2	0	0	1.5777404357280382	58693.49813007872	0.6218256166510793	14.40700731084091	94389	0	1
1a1e75dc66264584ad4a0ce98bd976ad	0.053430022006065905	0.3602954984213805	553.4834923926318	0	0.0774440066587042	83.47695304489368	8.003440514821724	0.2052084852514572	0.1929394734577185	0.0882080181465261	0.031517616067092	7.971922898754632	0.0448575156412057	0.5229342439677728	7.864155344088027	553.4834923926318	1	0.2313497010949486	1	0	0	0	0	1	0	0	0	1	1	1	1	0	0	0	1	1	0	1	1	2	0	0	3.292842529282021	398.2312252964427	0.1967545579527879	27.937645487353343	2024	0	1
3f62864f12cb410889ff0079c225ea4b	0.1318767932230436	1.6918164576755443	7383.939763373994	0	0.8132926435187404	3.836006852534579	4.651547167535855	0.9835714123127806	0.4666510231351252	1.021886779783958	0.0193798610827693	4.632167306453086	0.3347745787790973	1.1512708097403743	0.4871461736927516	7383.939763373994	1	0.3580117542412994	1	0	0	0	0	1	0	0	0	1	1	1	1	0	0	0	1	1	0	1	1	2	0	0	2.6330713636374035	2004.6736672051693	0.3598409023882911	25.492305091361363	5571	0	1
bba4549bced443339538d2e70537f501	0.07457794936201552	1.059839410400373	6149.675520267628	0	0.2153100823651836	17.352357502720473	6.264189740852848	0.3442031300497812	0.332648779072546	0.1268752013849881	0.0378567227590128	6.226333018093834	0.1511566182167633	0.6118900787800409	3.178043529628479	6149.675520267628	1	0.255933673773378	1	0	0	0	0	1	0	0	0	1	1	1	1	0	0	0	1	1	0	1	1	2	0	0	3.0065102103098544	4177.655951293759	0.2543473942949016	30.73987935197348	16425	0	1
749670c4a6f04fbf86dd628fdda135aa	0.09177258846996118	1.5198587811824231	864.6742997208036	0	0.5996456668808939	10.286113045730652	4.9104492001696105	0.5857928527736513	0.4847224012317409	0.312807697337947	0.0401081948352741	4.870341005334336	0.282056751917336	0.899788936820587	2.389566390265479	864.6742997208036	1	0.4664668644640297	1	0	0	0	0	1	0	0	0	1	1	1	1	0	0	0	1	1	0	1	1	2	0	0	3.9933772164746215	79.92134831460675	0.0748327231410175	20.89586752514413	1068	0	1
c236f81d2de4438ea7568b2aa5ccce2a	0.06459611094088914	0.2909418036422332	1232.8662497047558	0	0.075410887511888	146.1635416212023	7.542549859153024	0.1703444372866139	0.1195850475505867	0.0994978528554629	0.037304695390123	7.5052451637629	0.0377695396381483	0.3389201712562579	9.665961327848953	1232.8662497047558	1	0.085849655169878	1	0	0	0	0	1	0	0	0	1	1	1	1	0	0	0	1	1	0	1	1	2	0	0	4.024534453194341	970.0893506009504	0.0903838023479875	43.198148768935	10733	0	1
ea4c9c24012148d0a09bc1110d83f8c0	0.1265325518764732	1.3560838896671084	46665.13633508136	0	0.9097984901681682	3.859234626129976	5.400569226905934	0.6964102771631225	0.464188005446172	0.608221335275426	0.0650596574062389	5.335509569499696	0.3792897210266034	0.8779461680552307	0.8024647427813615	46665.13633508136	1	0.2858021998644462	1	0	0	0	0	1	0	0	0	1	1	1	1	0	0	0	1	1	0	1	1	2	0	0	3.343842873307799	12674.6017310297	0.2093522138520316	35.68164333424125	60542	0	1
37a95fe344254851bd24623090e063cc	0.059976728914598786	0.468069061954892	4314.398841532965	0	0.1274766123426642	86.31701596951086	10.04152183081511	0.2281375897879742	0.1958437163842459	0.1068441857819911	0.0301191799353315	10.01140265087978	0.066752933811494	0.4717058266296673	7.269065224073989	4314.398841532965	1	0.1704596270021117	1	0	0	0	0	1	0	0	0	1	1	1	1	0	0	0	1	1	0	1	1	2	0	0	3.0482358636912394	5232.126663228469	0.2698363415796012	32.450633480516245	19390	0	1
664f25d4dcb34c0ab15f30ebf382d532	0.057061461066770305	1.0666073237209268	9007784.060104825	0.0112026323374822	0.1950261813726249	3348.843174842614	2694.999999999999	1.2800856466298018	1.992598139442156	0.1046743690038399	0.023067795552713	2694.9769322044463	0.1391225126683268	42.91510227045757	56.27742037625503	9007784.060104825	0.9983651787248672	1840.0673836211251	1.1962058016163222	79175.77453923272	736.9994356168819	7.359553558845276	6.921626713633954	0.0300743807197147	0.0828114694084201	0.0242770567793057	6.914678093447885	0.9983440744618464	0.9982857279009624	0.99966331692368	0.9995528422596244	-0.0449035	0.0178413389303045	0.000454286315334	1.0424547622255331	0.9961151376923943	0.0262216343312087	0.1161582438421463	0.9980554224480958	2.084909524451067	0.0242770567793057	3.5702950681198065	3.075957286236149	1161.0470251482311	0.2373843846142366	31.07701346729381	4883.004089143325	2.888208832741873	3.9580862809241455
bbfee03d2c8e449888293dcb632eb580	0.07098669918141765	0.5325084714920829	407.4133494939212	0	0.1695318701803985	119.203804169609	9.332030973456094	0.2843237266698251	0.2257686927385962	0.1541230943681446	0.0302075899675136	9.30182338348858	0.0818946308873901	0.5628557969222856	8.474262933341512	407.4133494939212	1	0.2359666665816037	1	0	0	0	0	1	0	0	0	1	1	1	1	0	0	0	1	1	0	1	1	2	0	0	3.4256463895106397	139.92379471228617	0.1088054391230841	7.63154101231349	1286	0	1
085775034a3d4ed7926ab66c5f1718c7	0.07170836498092609	0.7249713253539471	8848.186376958764	0	0.1212927719022912	61.08452438196549	14.75976507717972	0.2904784485144386	0.2793378005195632	0.1166404638558214	0.036882579112054	14.722882498067666	0.0818846674539786	0.5942409748173919	5.532764966139828	8848.186376958764	1	0.2687446071005687	1	0	0	0	0	1	0	0	0	1	1	1	1	0	0	0	1	1	0	1	1	2	0	0	2.40877019691596	9966.902302749731	0.3977691783832753	22.432697364284884	25057	0	1
ff1b3680e0e34150a8bb9d5f2b3a41f8	0.07341663588264023	0.3062918622829744	2307.214047771176	0	0.0719811831032206	132.5714540549204	8.940129578002875	0.1938066722440188	0.1439836063890911	0.1071861187816237	0.0409575780165434	8.899171999986331	0.0376674980353827	0.4124754316264054	9.306161966131572	2307.214047771176	1	0.1325749554890888	1	0	0	0	0	1	0	0	0	1	1	1	1	0	0	0	1	1	0	1	1	2	0	0	3.062709311410731	3165.8242754959074	0.2334506507997867	29.6894906790496	13561	0	1
1a2e1879fe4a40e8bd20236753ec3b27	0.057210652481875984	1.1187328637442835	4368.229561229472	0.0164729916051862	0.3549289692761541	201.25120356403457	36.35784923361327	0.562944999381246	0.6131488018799606	0.1823824281246094	0.0294563585560494	36.32839287505722	0.1815859121714367	1.8253719851671348	12.204416211523846	4368.229561229472	0.9969535485980564	3.0150758119046563	1.0049971673996896	0.0058985711496451	0.0053075575172935	0.0050493666198737	0.0047640671665893	0.0360732696567904	0.0047640671665893	0.0432968651413586	0.0047395081281971	0.9976179664167052	0.9976179664167052	0.999047186566682	0.998411977611137	-0.0276991	0.0132862566012429	0.0047640671665893	1.0024597336609946	0.9903537749785714	0.0489459619829435	0.0406940925346245	0.9951582327557104	2.004919467321989	0.0441818948163544	0.0024533584466157	4.491000545613126	63.967200610221205	0.0487926778110001	36.39153766085362	1307.006102212052	0.0015232257009718	1.0045766590389016
7136bb04997b45be9f2211bc53441124	0.04510144115494659	2.888055595572785	36005.2419664139	0.0399764130308942	1.3801665901362594	351.84585959743947	116.75869680989344	1.298974888505919	1.4877946522545331	0.2744932515801241	0.0237464812022323	116.7349503286912	0.6351232559573334	4.5899910168183045	16.141201392361054	36005.2419664139	0.992994784435548	19.380681773503767	1.015913470146195	0.3787506419890966	0.1102262164964366	0.0366977175416887	0.033393221795431	0.0451825870950617	0.0144538476826416	0.0811390737564687	0.033177404335627	0.9951091290743624	0.9945866966763408	0.9989893729499943	0.9979797429127858	-0.0415996	0.0387969234327631	0.0050661905659626	1.007514664340431	0.9837754682454662	0.0900736307439314	0.1194211934474955	0.991847583893918	2.0150293286808614	0.0816611149193185	0.0175227348342799	4.172451102880921	130.48390871854886	0.0763510290921877	39.04004031936388	1697.0280866003511	0.0186750966640999	1.0327677004095963
fab490609a4840de90ccc8847c1bf6e3	0.07065105026543946	0.3538083627230668	720802.2505783364	0.0037896396145732	0.0960801882269032	9739.623136834534	497.2681841537502	0.2537941481133153	0.2317871128101367	0.1145865047313196	0.0382560198419102	497.2299281339083	0.0476479746882153	4.152300339546851	95.66979107584292	720802.2505783364	0.9995216695747358	17.177186640184335	1.0066115848986212	18.922938189998103	1.0220601134879792	0.0611299877077781	0.0520707695280336	0.0786832290875152	0.0040176466875933	0.0077864288920772	0.0520543873789517	0.999596256176057	0.9995621982858528	0.9999160998215804	0.9998745417118128	-0.127	0.030015343949632	0.0001697757101146	1.0021710165785882	0.9989353814194776	0.0084340335248189	0.3840161484016953	0.99946753219673	2.0043420331571755	0.0078885834907243	0.0283001893089529	3.304440840820213	8767.820695593933	0.2097263717072653	32.271553288097095	41786.0029182414	0.0239645466682696	1.0276036932497727
4306e7c387ff4da49d320dc0c68e6da1	0.08449661120927682	1.5271732704282497	8825.019007198212	0	0.9483429948142924	6.583466385977091	7.229416028850933	0.8677326017447773	0.4718092312107673	0.9579080943921292	0.0147332987688866	7.214682730082046	0.3626929964551604	1.048269649244344	0.7272140893853859	8825.019007198212	1	0.3459093893960996	1	0	0	0	0	1	0	0	0	1	1	1	1	0	0	0	1	1	0	1	1	2	0	0	2.957572122332825	2309.2863902378285	0.2875465558757101	26.78806720831389	8031	0	1
7aa76d9b44514d7ab65b7ec2c985b386	0.006058732729239401	0.3626675986963223	971825.3889411794	0.0331943153007877	0.0704663261080421	2651.500974652642	757.9810914585033	0.6565700013670063	1.1096163463090891	0.0211557201645732	0.0006835269993164	757.980407931504	0.0473948092142139	12.633425783451528	48.98984175333283	971825.3889411794	0.994101184971238	159.17236285928283	1.0400014850908263	459.1356131945491	15.469276043351178	0.5855007371659556	0.5514703855315397	0.0323127172318948	0.030485989753852	0.064339696120137	0.5505320285940404	0.9961142836801794	0.9959425806551184	0.9996490756170616	0.9993413451394488	-0.0207134	0.0242476726524614	0.0043882729654347	1.0156246533307378	0.9873808589992724	0.0713936576235965	0.0797750758666122	0.993665269967672	2.031249306661475	0.0651175898415908	0.2842427806743738	3.301641481547787	1276.0862210543603	0.2095723798742585	29.576861327328857	6053.082115289867	0.2371362265012918	1.263918541632452
d5ad62722e4f4e2cbc67a90b78e6b3a9	0.01245316583358377	0.1272458874747383	958.9115992805624	0.0201894012911455	0.0453345237389612	410.376395906178	29.1343196373352	0.1712084177430824	0.2387755202068909	0.0359328715404568	0.003652929858287	29.130666707476912	0.0215844752490234	1.360581013240968	19.38289557210601	958.9115992805624	0.9961464498144036	1.821868371285729	1.0031478690315243	0.0030515205756637	0.0030750913590087	0.0031234709816227	0.0031478690315244	0.5368814782844156	0.0031478690315244	0.0268651314488979	0.0031234709816227	0.9984260654842376	0.9984260654842376	0.999370426193695	0.9989507103228252	-0.000239723	0.002678722499161	0.0031478690315244	1.0015739345157624	0.9937408590118036	0.0300130004804221	0.0015800601771228	0.9968521309684756	2.0031478690315248	0.0268651314488979	0.0015678350032867	3.2730470564340486	63.5984555984556	0.1227769413097598	5.746261981783218	516.003861003861	0.0019267750927982	1.005791505791506
1e54313ad475488e98098b0fab37f810	0.06792247919262938	1.2500809826996977	13272.30901990506	0	0.3085773681143304	84.14197445455926	20.299382658986183	0.4141677309213743	0.4237861824938595	0.1330485503706998	0.0326594687341153	20.266723190252065	0.2007110749943764	0.7969884996513166	5.649062626041028	13272.30901990506	1	0.4636557592398965	1	0	0	0	0	1	0	0	0	1	1	1	1	0	0	0	1	1	0	1	1	2	0	0	3.845701691713153	2365.301124670974	0.1131993838081346	42.21488620188191	20895	0	1
514094d0a48c4328bc7f4eff8abdc2fe	0.06682215757538766	0.5091212330725918	33250.16418993195	0	0.1224593800674348	94.73505989236064	16.732027897576444	0.2451339501835829	0.2205029289841152	0.1047077827991224	0.0341133112301868	16.697914586346258	0.0691714895056387	0.5176178643736734	7.191434571520463	33250.16418993195	1	0.2078375999861551	1	0	0	0	0	1	0	0	0	1	1	1	1	0	0	0	1	1	0	1	1	2	0	0	2.1537126272299654	57255.61912474517	0.4613630762422959	23.450200533009465	124101	0	1
eb8d7b1c38bb41848e9b8fec5b18ec6f	0.054675052687697165	2.1198395460241426	10409.146478617136	0	1.0643943185701434	11.603852400787174	9.893514457420094	0.7760904194550283	0.7571135998750902	0.29560151616587	0.0265542245333068	9.866960232886788	0.4778402656738067	1.293428888542649	2.414028999743448	10409.146478617136	1	1.0706419505467903	1	0	0	0	0	1	0	0	0	1	1	1	1	0	0	0	1	1	0	1	1	2	0	0	4.303026093267265	369.6374156219865	0.0594081349440672	36.38942808365211	6222	0	1
4972e86f7a0f4081bd5ef67d96ab8088	0.29529419280731206	1.541057044393324	64971.25064341075	0.0003460609839767	0.4769561208157863	401.7181783679452	33.871904722561666	1.0264571861825953	0.3486292111160232	1.049225280467757	0.0036439069705674	33.8682608155911	0.2127969833952208	1.1490484560337104	7.352697722979022	64971.25064341075	0.9999593578541116	0.2666979992475624	1.0000244835734526	2.448104737664343e-05	2.448167885161725e-05	2.4482941907174144e-05	2.4483573452554677e-05	-1.22419e-05	2.4483573452554677e-05	0.0004095760782843	2.4482941907174144e-05	0.9999877582132736	0.9999877582132736	0.9999951032853096	0.9999918388088492	0	2.079454986353077e-05	2.4483573452554677e-05	1.0000122417867263	0.999951033800413	0.0004340596517365	1.224194461459657e-05	0.9999755164265476	2.0000244835734526	0.0004095760782843	1.2241628839932204e-05	2.464676890239112	19565.76303115284	0.3976053776982429	21.00164733706163	49207.000040642975	2.0321072944260052e-05	1.0000609644577212
8ba87509d39643a7ab33445aa3c0ff93	0.08280815754166393	0.9508921567701664	11774.71350597212	0	0.1881733826317211	9.92023354858242	4.688402206674266	0.301058137212409	0.2697422383871403	0.1225798416049624	0.0173376949665333	4.6710645117077325	0.1346642235460701	0.4862705244336829	2.400195729288709	11774.71350597212	1	0.1458230209512033	1	0	0	0	0	1	0	0	0	1	1	1	1	0	0	0	1	1	0	1	1	2	0	0	3.4383128394266214	9393.85396417383	0.1886467580563464	32.91242050843205	49796	0	1
ccbbfb406aa64ba0b373e357d3dab4f6	0.03147602701147883	0.2188113755579983	4569.842736727167	0	0.0526686571610285	118.92721189156693	9.788003193039524	0.124324198004961	0.1167974528017164	0.0524912766564079	0.0045445178756962	9.783458675163828	0.029029042494419	0.3036949448626714	8.241628778432048	4569.842736727167	1	0.0767741133255642	1	0	0	0	0	1	0	0	0	1	1	1	1	0	0	0	1	1	0	1	1	2	0	0	2.8012509040831803	15384.562363768468	0.3104981505563992	27.860561689671076	49548	0	1
ce28d78ac0744635b78d411a69988b76	0.03517019806859288	1.576081518305414	80433.76082539579	0	1.13683462294504	4.236631399059171	7.36185107393282	0.8579657904766639	0.5068898762909958	0.9439175231292392	0.0022406884822266	7.359610385450593	0.3975372074958143	1.0635849203967769	0.4788191944032705	80433.76082539579	1	0.395107585267171	1	0	0	0	0	1	0	0	0	1	1	1	1	0	0	0	1	1	0	1	1	2	0	0	1.5411728953144128	44429.55473672367	0.6248530987950561	14.657813491657304	71104	0	1
5e48cb99332243bf851609afd7126211	0.046834117573349265	1.01905581416507	4696.762422013062	0	0.1713554313194583	89.29306045191812	16.91723362986701	0.322836228453576	0.3639552696104738	0.0856835436160799	0.0237375219717997	16.89349610789521	0.1329848301001773	0.7153220482000706	6.269466691801626	4696.762422013062	1	0.4074624022390146	1	0	0	0	0	1	0	0	0	1	1	1	1	0	0	0	1	1	0	1	1	2	0	0	3.645970671526981	1236.760540363874	0.1347380477572583	35.04236633587699	9179	0	1
fbec1a4017f24186add690a6c7ddc96d	0.057608202003104535	0.1723913771821384	103.96666243531922	0	0.0453984464985439	1105.8240788622968	6.693671984399538	0.1112849854841816	0.0522693857502928	0.0833249472753665	0.0372950770897422	6.656376907309796	0.0209130171484162	0.1925907845337003	27.613631744728007	103.96666243531922	1	0.0247068622930916	1	0	0	0	0	1	0	0	0	1	1	1	1	0	0	0	1	1	0	1	1	2	0	0	3.652214140806191	367.7477702461648	0.1311979201734444	36.97655116727415	2803	0	1
664c04b929ce49d39fe9cfb826568dd8	0.05648022135038296	0.2279997277958406	7350.06270637245	0.0003438677783147	0.0476709951465084	10989.419471411384	54.74420088188191	0.1422995373354423	0.1048634293937362	0.0791736618440686	0.0481298306365033	54.69607105124541	0.0256728162972855	0.3851367206041592	75.73269413120356	7350.06270637245	0.999959639174234	0.1280811352318453	1.000032917821815	0.0002633173711435	0.000131661835804	6.583406836183755e-05	6.583564362967649e-05	0.3076840781383986	3.2917821814838244e-05	0.0002764811805791	6.583406836183755e-05	0.9999890273927284	0.999986832871274	0.9999949357197208	0.9999934164356372	0	1.3978984055082384e-05	4.1147277268547805e-06	1.0000164589109075	0.9999670827689106	0.0002929400914863	8.22955390897954e-06	0.9999835410890924	2.000032917821815	0.0002764811805791	3.291742799787851e-05	2.5248087848808805	15292.942121407814	0.3086241144940227	25.71797563840725	49550.00004036164	8.072165153211589e-05	1.0001614465611883
a852ae9003fc4d0e8cfd66be4e786c1b	0.06740675049820903	0.7996696054868548	7677277.111355253	0.0013697754975973	0.1555135686022781	49413.65289487099	2765.000000000001	0.3440680129547045	0.3637449782200244	0.1122706935779987	0.0531361764690832	2764.946863823532	0.1016548353154583	12.419074977428906	221.903286076416	7677277.111355253	0.9998392912749262	154.1150404974622	1.0063226016939015	6192.364246935873	56.13584536157186	0.5098723767249627	0.5043169218049486	0.0049262706596349	0.0048915457487395	0.0027107472699651	0.5042918187538917	0.9998742260883524	0.9998618174953692	0.9999792587235112	0.999976551917716	-0.0790327	0.0075508987414512	5.377677027010043e-05	1.0024636830354725	0.999660888995854	0.0028875669175514	0.1154527014799301	0.9998304280341788	2.004927366070945	0.0027179949517315	0.2535473246324778	2.6526251880063683	15607.01257608936	0.313538633828663	25.748212987494995	49769.00040179199	0.2435005121536227	1.2482070032344257
def6070cb9b149fbb12b8db6e284d2fd	0.06388657783309455	1.639037495490979	10957.640335248929	0	1.0403224277494894	9.970826376914257	7.589697849061693	0.7796687118195903	0.5620683213595803	0.6642245646187617	0.0229719021250019	7.566725946936691	0.4223664482217737	1.0591456703922555	1.7332119433928386	10957.640335248929	1	0.5139062509202408	1	0	0	0	0	1	0	0	0	1	1	1	1	0	0	0	1	1	0	1	1	2	0	0	2.54426148058196	3623.453316953317	0.3709514042745001	23.6385589995848	9768	0	1
4bd9b93d23ff46019ab198168eb7814a	0.058974402140051785	1.572083198932632	269324.031127765	0.0006308388200344	1.031151890567563	29207.19042210924	280.38682266471704	0.911054506073811	0.5083840094475968	1	0.0175939922579966	280.36922867245903	0.3822006731037374	1.5249944824566593	140.2481152857068	269324.031127765	0.9999309216349443	1.4955878584858588	1.000120048007178	0.0853290977784074	0.0085371537949753	0.0009223480973944	0.0009223707980348	0.1538372569069093	0.0001200480071782	0.000450807789967	0.0009223480973944	0.999981663969896	0.999979595943352	0.9999959598724928	0.9999936795370168	0	2.1143024776404263e-05	8.146975870418887e-06	1.0000600240035893	0.9999502131159678	0.0004757017089424	1.2447167615709996e-05	0.9999751060810238	2.0001200480071786	0.000450807789967	0.0004611797238573	1.6989934911490403	67349.11854103343	0.5815584289602914	16.07466309605904	115800.00017269964	0.0015542606786119	1.001934235976789
54b97bad2a8d425abfd7d62a9fdc4387	0.07607493124420693	0.2678921192062273	5093.121534968314	0	0.0503100229819435	111.16462404145012	7.534446665309322	0.1688181727002409	0.1151257568210991	0.0991608344114292	0.0662811895953236	7.468165475713999	0.0279469135687797	0.3199984397884678	8.222674563030482	5093.121534968314	1	0.0738994260332052	1	0	0	0	0	1	0	0	0	1	1	1	1	0	0	0	1	1	0	1	1	2	0	0	3.4011045997755294	9063.874421971128	0.1822323861428109	36.088119706973416	49738	0	1
ae69103d71314b20b1cbb31c09cb283b	0.12600138180420997	1.1896915271361812	44458.26736508347	0	0.6298027360464666	7.902601639943387	8.284197842994688	0.4827268339613821	0.3903910582928276	0.2195730475449704	0.0613002677531405	8.222897575241548	0.2770769822173301	0.6842323870356107	1.7684635833800748	44458.26736508347	1	0.2351487632420702	1	0	0	0	0	1	0	0	0	1	1	1	1	0	0	0	1	1	0	1	1	2	0	0	2.565049875305098	32440.03008603532	0.3416142425420469	28.001997545348782	94961	0	1
095536252d564d13983499bddd58716a	0.08085637138104938	0.614070972524448	62539.05864792245	0.0010351203077479	0.1373779393709991	27661.695506692104	209.11628640829355	0.26667600599188	0.2235940840127797	0.1252065197855847	0.0662811895953236	209.05000521869823	0.080042736265504	1.1255191877823163	151.11201572938197	62539.05864792245	0.9998784687058913	1.195677349894384	1.0004315431051003	0.177846271318145	0.022501737807783	0.0029294796735773	0.00292967687056	-3.19492e-05	0.0004315431051003	0.0016321231286719	0.0029294796735773	0.9999286940534886	0.999922518621648	0.9999790373819946	0.9999717410785872	-4.34869e-06	8.683290064634964e-05	4.7642356794594014e-05	1.0002157715525504	0.9997955429269556	0.0017343583225492	5.112035798596299e-05	0.9998977648061218	2.0004315431051003	0.0016321231286719	0.0014647891360343	3.542870671606753	8616.680116674768	0.1745397852186592	35.22234222225059	49362.000243072434	0.0014988876019035	1.001985091557284
85010ae469c94eec880ef11071712401	0.17975580857547283	1.3541022126492386	89840.63854378034	0.0028624833069713	0.5953798930958781	2580.4741079141904	67.17299154914305	0.9126569184042072	0.3629609419937463	1.004901305536619	0.0382493030632078	67.13474224607984	0.2545342409799571	1.1739580726570675	37.9280805818556	89840.63854378034	0.999601222771561	0.5452349056456326	1.0002366003566348	0.0010808413746702	0.0005026929672123	0.000296063673973	0.0002104723491254	0.101345950452579	0.0001823557146263	0.0023897950350949	0.0002104311503294	0.9999135082484366	0.9999116338061366	0.9999802504559104	0.9999558169030685	-0.0818401	0.0089854323912824	0.0001577536594396	1.0001075938892705	0.9996381206746722	0.0027663924792163	0.1098564314799808	0.9998190339802696	2.000215187778541	0.0025913959952457	0.0001266340057746	2.1925212839561588	29083.633797631464	0.4461501165495408	21.57508591394712	65162.00451003252	0.0002914117390393	1.0007516720868872
d1b945adfcb04d72a23d743936f88f95	0.0918851171697403	1.3707554265997568	33382.99385659891	0.0014839245322419	0.9513937326279212	1449.8212990335717	49.244544719387015	0.8029812512830168	0.458553777969823	0.9430160287196	0.0453881929039301	49.19915652648309	0.3733420496807468	1.0591936446142407	23.76083054516324	33382.99385659891	0.999798380323969	0.4771122868791593	1.0002259404029266	0.0002630572616558	0.0002401453655592	0.0002287622314596	0.0002173254318298	0.0255323507881881	0.0002173254318298	0.0029562346221915	0.0002172777473982	0.9998913372840852	0.9998913372840852	0.999956534913634	0.99992755818939	-0.0187431	0.0023427478424514	0.0002173254318298	1.0001115343729472	0.999559678420957	0.0032199421913235	0.025738212352163	0.999779802911138	2.000223068745894	0.003002616759494	0.0001115219158223	1.9871149604004112	15146.72960075279	0.5090311063567949	21.20677517555926	29750.000604920016	0.0001008098380155	1.0003024600080657
ff78211cd7e94ec89d197e4e49bc75ad	0.09244833887292056	0.4302409044129917	204.71749019596612	0	0.1040593171997239	127.9857239312645	5.495516813642102	0.2201434571749596	0.1342018617837722	0.1435509438582809	0.0582420730613464	5.437274740580756	0.0533974576765498	0.3477354724054321	8.483783450856993	204.71749019596612	1	0.0724568170320857	1	0	0	0	0	1	0	0	0	1	1	1	1	0	0	0	1	1	0	1	1	2	0	0	3.803011677601363	214.60189013585352	0.1267583521180469	32.94160486405752	1693	0	1
6c9cf53d2ea64a1883d04e9314df7796	0.05635496155000699	0.9170792862318248	1140.085045383657	0	0.3120886327076198	17.187910313090242	4.9116987069929285	0.3705128698722525	0.3379349003856076	0.1643597962533897	0.0286544688883353	4.883044238104593	0.1533602866057695	0.6584014069649348	3.3562568735630927	1140.085045383657	1	0.2962126259524327	1	0	0	0	0	1	0	0	0	1	1	1	1	0	0	0	1	1	0	1	1	2	0	0	4.208746903162111	182.18250950570345	0.0692709161618644	32.47746186875623	2630	0	1
aa8d0e16c62f49668706d0c17f5594b6	0.05229489276023973	1.5637412312129804	9616.15138905769	0	1.0339182632460209	15.10094792102894	10.834938045807403	0.6586793613489474	0.6043432627111622	0.2750863341073161	0.0216732300418581	10.813264815765546	0.442469187794241	1.0174024730401918	2.3404727281966067	9616.15138905769	1	0.6012492910812411	1	0	0	0	0	1	0	0	0	1	1	1	1	0	0	0	1	1	0	1	1	2	0	0	3.47570407489681	1640.6092572658772	0.1765994894796423	33.91834459776534	9290	0	1
ada5c7436f864e9eaa5173aee1289918	0.04730853193242893	0.2111008860385283	98.01200694037708	0	0.0529016818793587	40.69080128474136	2.218902709873401	0.1188360596289554	0.0798183164072721	0.0720233503244405	0.0247572347462719	2.194145475127129	0.0267599150547654	0.1985188489533869	5.339754714997643	98.01200694037708	1	0.025287724321641	1	0	0	0	0	1	0	0	0	1	1	1	1	0	0	0	1	1	0	1	1	2	0	0	4.011966848304018	227.18737434660235	0.0913499695804593	34.72735603505741	2487	0	1
39359f5b097e4a4fb61c8b1f4c7cd204	0.058680067825206725	0.5902362678466546	21089.80164702905	0	0.0917658267301232	49.3077155336728	11.934305682508077	0.2681796420296412	0.2865613556312499	0.0884543310033223	0.0326230711578868	11.901682611350187	0.066176984880767	0.635960162552802	5.6292196016961125	21089.80164702905	1	0.3325250079550399	1	0	0	0	0	1	0	0	0	1	1	1	1	0	0	0	1	1	0	1	1	2	0	0	2.8318235096027595	16425.232620577237	0.314991516359713	31.438219816051152	52145	0	1
a434d97b98374409aed928b740e2f90c	0.04136080607814797	2.3185430323890843	608.5343106531631	0	1.3442221874120373	5.4073652325739525	5.574325890789395	0.8527035445295105	0.8131249431574058	0.324679743247634	0.0281767549724278	5.546149135816967	0.5761529702504766	1.3319731638411094	1.54847307423664	608.5343106531631	1	1.047049174339704	1	0	0	0	0	1	0	0	0	1	1	1	1	0	0	0	1	1	0	1	1	2	0	0	3.78921969767356	37.6997084548105	0.1099116864571734	24.849271987012216	343	0	1
b0acfb9b75c74d3aaeb34f18db7c86a1	0.04863016118846999	2.035074034443533	507.4216216883868	0	0.8295348320743262	11.094465504318975	7.570465525134114	0.6849599392758413	0.7273509951094009	0.1836497718074596	0.0252689128033692	7.545196612330745	0.4437252379362827	1.2057902587532627	2.4015432505980265	507.4216216883868	1	0.984760029691496	1	0	0	0	0	1	0	0	0	1	1	1	1	0	0	0	1	1	0	1	1	2	0	0	4.299855115844618	19.87679083094556	0.0569535553895288	37.91881840050574	349	0	1
17b33e5007cb4dfc933ba7876dd2bf87	0.06642595186108669	1.4743196135976844	4480.271570129822	0	0.8169848806660222	6.518220055521804	5.176487799556696	0.5622293859586432	0.5039014683802322	0.2562651822746998	0.036476440773886	5.14001135878281	0.3501360585310892	0.849867612579623	1.7029925390017202	4480.271570129822	1	0.4061730764763551	1	0	0	0	0	1	0	0	0	1	1	1	1	0	0	0	1	1	0	1	1	2	0	0	4.157779345077388	499.9908108979526	0.0806046769140662	45.819072376065535	6203	0	1
da3cc8bbb23549218fd514cb87ce8912	0.06392985899051747	1.6036808902544608	16202.06285473787	0	1.1194974172249352	3.380233948866595	5.98105851146818	0.8128337178555499	0.5520305493522703	0.919577907266845	0.0385497178685306	5.942508793599649	0.4561315226054316	1.0335931692045028	0.5439506369637374	16202.06285473787	1	0.4076161865433319	1	0	0	0	0	1	0	0	0	1	1	1	1	0	0	0	1	1	0	1	1	2	0	0	2.626904928982505	5646.542661215878	0.3723158816573834	26.63554726002132	15166	0	1
ecf62698fbe347b387e058d391c2adac	0.05303359181720545	0.5797516857921348	703.3040640840663	0	0.1803837304618011	112.13674038394709	9.981314655692875	0.2531967497110144	0.2263876643568732	0.1131724722596323	0.0333552625932593	9.947959393099616	0.0913259520256821	0.4945983224304138	7.18400379106771	703.3040640840663	1	0.1805189064867575	1	0	0	0	0	1	0	0	0	1	1	1	1	0	0	0	1	1	0	1	1	2	0	0	4.151432470631792	207.21078260869567	0.0720733156899811	28.929519062381853	2875	0	1
ad5dd362b3db4f94a07a1b8676bb4bcc	0.04566650655359954	1.3834055407740748	16369838.248167723	0.0238843686051818	0.3973575346678382	21757.881113215022	2323.8386097527887	0.726756480666245	0.9484705024135992	0.0916694615759343	0.0037094700434757	2323.8349002827454	0.2555429275298237	11.511933671548736	131.3199154618171	16369838.248167723	0.9963290347781716	131.99644187594714	1.0256013176610763	2648.0402553617846	31.22980686109793	0.4766048194882652	0.441494802931637	0.0384004692539627	0.0157972930903944	0.044906055475551	0.4412435894938787	0.997637064160858	0.9974303446364516	0.9999647297341192	0.9998620726701491	-0.0638473	0.0526701549127613	0.0022153749004731	1.008376769833597	0.9923840602349424	0.0506476689657805	0.2024533598125265	0.9961836258066634	2.016753539667194	0.0460989280621166	0.2295249056049755	2.688125689287407	42287.90867287874	0.3423484587718784	26.39321090310288	123069.55136290408	0.2006274384035479	1.2156278587793363
fea706a1582c4f628b8ea9b4b17f1111	0.043512597360737634	1.6574245414764517	416195.84560227575	0.0082956356583956	1.1452387750898387	11188.860726172245	483.0127219501652	0.8862673440029845	0.6998788888767697	0.7997817030856096	0.0048555967532124	483.007866353412	0.4776864266662202	3.7343958760038425	93.23253582045912	416195.84560227575	0.9988611489660008	13.160242753668404	1.0060488952780184	13.57960920629971	0.715185049723276	0.0444999785283899	0.0380745386836362	0.0782707077087425	0.0041508523276216	0.0154602456191605	0.0380571157763201	0.9992439963929636	0.9991599282359022	0.9999378191167924	0.999849486519932	-0.0599673	0.0265353198544496	0.0005294731393623	1.002218802118042	0.997720690598384	0.0167895986262194	0.2601188691751862	0.998859617880302	2.0044376042360845	0.0156086962021212	0.0206436293030065	2.46297120220421	12105.266653263638	0.4056181025755139	26.598701385523988	29810.01212974132	0.0182240776282749	1.022249028280391
8d6cd91bee714566b23d54ca08e0fceb	0.0892723536575866	1.1232708709035597	1062.2350783226616	0	0.4518490281792721	22.168691550882254	6.993681068040455	0.4429443036520188	0.3627217964008553	0.2210411263885014	0.052052681165788	6.941628386874666	0.2160270220290131	0.6749102851003576	3.0462342580112303	1062.2350783226616	1	0.2593042367964739	1	0	0	0	0	1	0	0	0	1	1	1	1	0	0	0	1	1	0	1	1	2	0	0	4.120803226064971	175.2075471698113	0.0751318812906566	26.05888540082203	2332	0	1
b78c8f1d897e4457b40db7b574db6b61	0.06290404126765389	0.7561872996971813	20014705.06230151	0.0087792463366136	0.1105233140825214	14425.598140213277	2781.0000000000005	0.5502222955880137	0.7493732859802907	0.096482801706199	0.0539263291851508	2780.946073670815	0.0821832296090874	20.05453484313637	114.46821870299316	20014705.06230151	0.9988750721276568	401.8816232000087	1.0665641171719196	17644.699113533632	150.30371297572512	1.4760850575134048	1.2916712649592488	0.0665384400421197	0.0192684228472361	0.0161620189005733	1.2912970416561895	0.999166299459784	0.999097527576282	0.9999375609657992	0.9998861077367464	-0.0851571	0.0360356416931681	0.0003581956823861	1.0101784463076884	0.9977866451536256	0.0174015022905051	0.3887226323170686	0.9988926659174316	2.0203568926153768	0.0162480757683512	0.6919390806181634	2.2749240463622296	22569.55717874008	0.453522700266052	21.94204138371273	49709.01796443283	0.6322207614005457	1.651401587461067
7fbbcddea05449aeac0f88b5a320822f	0.0642011605616945	0.3950986309279679	5362.06965531816	0	0.0859029169778324	80.19813529404145	9.818714214957968	0.2087144051108695	0.1760439765679883	0.1011192841092209	0.0282035409234623	9.790510674034506	0.0486994578069284	0.4307271795878437	6.955949227460662	5362.06965531816	1	0.1419642003349143	1	0	0	0	0	1	0	0	0	1	1	1	1	0	0	0	1	1	0	1	1	2	0	0	2.2676966109800607	12458.475814822505	0.4310592974473221	23.52159277521679	28902	0	1
e9a30f06eabe4899bb4b01ec43436236	0.07794227730977428	0.9723479038838576	25478.43004712026	0.0007279125766018	0.2167412486394948	7594.883260721401	89.5744859756032	0.3366483043544006	0.3113889176956314	0.1358012542099904	0.0286422512147501	89.54584372438845	0.137098949919991	0.7396538976600072	60.28822471297601	25478.43004712026	0.9999141124054788	0.4337558074989473	1.0000374206595972	0.0005822143068303	0.0002050518532423	7.933049723835517e-05	7.93330228499822e-05	0.2307585478566528	3.742065959722902e-05	0.0003944658362651	7.933049723835517e-05	0.999986528715608	0.9999854809065264	0.9999965167595006	0.9999937133641732	0	1.9916638788942176e-05	1.724063284590342e-05	1.0000187103297986	0.9999531013177212	0.0004179157081111	1.172513244095511e-05	0.9999765501281538	2.000037420659597	0.0003944658362651	3.9665880022084346e-05	2.17155383575059	21481.50503532241	0.4612635553310517	21.06163997295939	46567.00012883554	0.0002147185252314	1.000386506624294
30286786f90d4bbfa959caa7a4928a37	0.002567010274269621	0.0650112476806412	11.183176463875569	0	0.0152945636516531	56.97717954052763	1.8168730552007093	0.047384205130063	0.0646967931134432	0.0086850149963747	0.0008741258741258	1.815998929326584	0.008669047725011	0.166997666475219	6.661919882306587	11.183176463875569	1	0.0256429577123606	1	0	0	0	0	1	0	0	0	1	1	1	1	0	0	0	1	1	0	1	1	2	0	0	3.669058782877397	49.24937655860349	0.1228164003955199	29.729118600008704	401	0	1
344a2557393147f39d007d28bfda43de	0.052763365619828695	0.67607217823934	7644.825352854358	0	0.1127586081397985	67.0434936164125	12.774762313034415	0.2642980787666057	0.2769386621709743	0.0896387364944117	0.0268780317286056	12.74788428130581	0.0790885964040254	0.5868100129514985	5.917662720175136	7644.825352854358	1	0.2744925168604188	1	0	0	0	0	1	0	0	0	1	1	1	1	0	0	0	1	1	0	1	1	2	0	0	2.828374169743458	6572.842169271655	0.29606063552415	26.67349450160424	22201	0	1
7e1116b36ce944f4be324a03d30f6581	0.06515666816979651	1.7844085384087185	5377.625795376436	0	0.9341487426818472	8.532266392488426	7.681366482544977	0.9736061868972564	0.5309560294513672	0.986387300900497	0.0183379194950633	7.663028563049914	0.3736519376181105	1.206064581963153	1.2856144159032468	5377.625795376436	1	0.5066827687013395	1	0	0	0	0	1	0	0	0	1	1	1	1	0	0	0	1	1	0	1	1	2	0	0	2.9774245890542903	1003.7368136326752	0.2715003553239586	27.864242176635628	3697	0	1
f923d9b2c8ee442f84817529c4ea7c71	0.05688575432880468	1.845021580406604	743.4945226132565	0	0.7552979753669853	25.461492109184825	10.116882750365052	0.701992616957507	0.6739284790463683	0.2766593874390137	0.0295921985108626	10.08729055185419	0.361831363652489	1.2699552681527866	3.8053871749386072	743.4945226132565	1	1.1199927488461672	1	0	0	0	0	1	0	0	0	1	1	1	1	0	0	0	1	1	0	1	1	2	0	0	4.1532133751997575	28.42733188720173	0.0616644943323248	20.39572559888199	461	0	1
a43585f49a634a6c9608266c3897ec01	0.051987504539517386	0.2173022968491558	5722.658022421188	0	0.0345138414397457	85.88970302155118	8.639010942153341	0.1446011105995958	0.1259052543892951	0.0693761163582808	0.0417091580825175	8.597301784070824	0.0209903858306062	0.3399758340543193	7.557729929621557	5722.658022421188	1	0.0946740865542935	1	0	0	0	0	1	0	0	0	1	1	1	1	0	0	0	1	1	0	1	1	2	0	0	2.5133763964906306	19171.741168629196	0.3872218530958614	21.77777798700582	49511	0	1
d327893fce71495889011c763ffc9b92	0.06354092753810255	1.4596939232085255	5236.820859499791	0	0.8563445345676798	12.675571388795174	9.931867699819437	0.551060202828464	0.5233104079816139	0.1869155150527836	0.0316225505745042	9.900245149244933	0.3647989221287397	0.8654323977378695	2.14149211168198	5236.820859499791	1	0.44530588791297	1	0	0	0	0	1	0	0	0	1	1	1	1	0	0	0	1	1	0	1	1	2	0	0	3.4191398011007674	1228.8441075514877	0.1757500153820777	32.353702613382275	6992	0	1
2471d41e79894d0c98baa18a5efd41d7	0.07166386421520499	1.5956000877244634	31870.340691031117	0.0013968266526336	1.063476259173343	1970.2185228920132	67.64237523018467	0.8228232522877621	0.5432752453267324	0.8305211515878784	0.0209881514500021	67.62138707873467	0.4256893347581115	1.182476743025731	27.98415696313672	31870.340691031117	0.9998245190733432	0.7212131432913306	1.0001403046932469	0.0009565075924287	0.0004506851647408	0.0002313468007055	0.0002015243502642	0.1281668641750694	0.0001253826608659	0.0013531450470731	0.0002015049069476	0.9999499989511332	0.9999449228385068	0.999983361796792	0.9999724614192534	-0.0470407	0.0029787200398154	5.875868264255495e-05	1.000066421838528	0.9998253879039248	0.0014479178794299	0.0544330248505295	0.9999126881838332	2.000132843677056	0.0013606060632635	0.0001082177877424	2.593982542125735	8505.569209845127	0.3731658495961535	24.471903382649423	22789.000263238715	0.000219348271045	1.0004826043083404
36f614c6619f4feca7cad849f05abf5e	0.07130587584594367	1.2896366491179558	17085.7240108243	0	0.708426569672683	8.293131153904259	7.435785758428649	0.5155726720973104	0.4263461033881945	0.280325862813054	0.0298234153737659	7.405962343054883	0.3008291864725917	0.7469034477131842	1.773828583633964	17085.7240108243	1	0.2920495799922805	1	0	0	0	0	1	0	0	0	1	1	1	1	0	0	0	1	1	0	1	1	2	0	0	3.2973794318351626	6513.618082084436	0.2126756810031813	34.625653012581665	30627	0	1
53075e592eed45d79c90d1070c823d6c	0.05995620364667468	2.640639092592868	894.350103612604	0	1.3816360363911089	4.753212049788274	5.632659411481901	1.1898291516399573	0.7846867762831666	1.0742234821438732	0.0189648377079792	5.613694573773922	0.5401214682273031	1.5783617821511782	1.222414505236019	894.350103612604	1	1.0755325052631826	1	0	0	0	0	1	0	0	0	1	1	1	1	0	0	0	1	1	0	1	1	2	0	0	4.2991222723735145	20.676880222841227	0.0575957666374407	31.8600879881441	359	0	1
b90ca84bbf634a81b6732cd88eeaefc2	0.0632404062787909	0.9971460968727068	9803.035985306067	0	0.3503958072500167	18.798601592856585	7.499813907227111	0.3717511278204204	0.3380312661123044	0.156927217916282	0.0313081845761184	7.468505722650993	0.1774618992420649	0.6293633815236727	3.1894994546844453	9803.035985306067	1	0.2578993649671574	1	0	0	0	0	1	0	0	0	1	1	1	1	0	0	0	1	1	0	1	1	2	0	0	3.856299154255743	2779.451250555578	0.1123055982284366	37.12970169591552	24749	0	1
1d4628d61da24d788134bb820a6a247a	0.046541013470733736	1.7997160098663982	4186.3639833442985	0	1.1893814680177288	25.32029817385976	12.367247000119212	0.8648280045653147	0.6691617061611869	0.7379444939897366	0.0181459496612039	12.349101050458009	0.4906780895090569	1.2650264987591389	3.062341746604383	4186.3639833442985	1	0.8523645650823811	1	0	0	0	0	1	0	0	0	1	1	1	1	0	0	0	1	1	0	1	1	2	0	0	3.3090014284766003	561.4426605504588	0.2146187540330499	33.215028196279775	2616	0	1
79db7521eccd48399b39167a4c9e61d3	0.06851334334633224	1.7358483895590575	10898.56210318409	0	1.06513444718106	15.85270924522532	11.046745452214823	0.7697313004048244	0.6354622690189395	0.4788940191654736	0.0303864845527458	11.016358967662075	0.4626192831102663	1.1393269926107616	2.439192176730187	10898.56210318409	1	0.7055797212685806	1	0	0	0	0	1	0	0	0	1	1	1	1	0	0	0	1	1	0	1	1	2	0	0	3.769163751009625	1125.8420676512626	0.1340926712304981	37.89526773905585	8396	0	1
b8a7fca427094663ba48712991ad165b	0.062024642655888015	0.3046598406646011	738.155039699441	0	0.0857989468427965	136.0450588852592	6.098227232146575	0.1674304795418969	0.1123968509039939	0.1020043567185426	0.0329977074527309	6.065229524693844	0.041919352756273	0.3020270616743117	9.060793415195006	738.155039699441	1	0.0631873805039889	1	0	0	0	0	1	0	0	0	1	1	1	1	0	0	0	1	1	0	1	1	2	0	0	4.027602678265011	732.659169550173	0.0905411727076338	36.32185135401606	8092	0	1
ee857e41743b4d68b34ba474a6d220cc	0.07038669730224013	1.3074131981183512	828.2034377026971	0	0.4458083205421193	29.49572707588746	8.977089897791698	0.5304194774995323	0.49496016874938	0.2207992853623002	0.0374552194231017	8.939634678368597	0.221984679083418	0.9917734288075648	4.267548055394998	828.2034377026971	1	0.702269711977837	1	0	0	0	0	1	0	0	0	1	1	1	1	0	0	0	1	1	0	1	1	2	0	0	4.321568943079453	48.38717339667458	0.0574669517775232	26.21382750040905	842	0	1
0809f1d9061649d7bc57cc5366c81dd9	0.03354539484220834	2.063194514589503	2186.720876802541	0	0.9261347718344872	14.780166425458363	10.018660177797166	0.7444817066953627	0.7580953461600299	0.2699516256656256	0.0145212881083822	10.004138889688784	0.4249904614851928	1.3499138481160384	2.9528651878237664	2186.720876802541	1	1.2680143857314106	1	0	0	0	0	1	0	0	0	1	1	1	1	0	0	0	1	1	0	1	1	2	0	0	4.050874060665574	99.43166666666669	0.0828597222222222	34.87378888888889	1200	0	1
2c556c8cf8ef49c592468925e0bc2512	0.061235721517744895	0.926852427801863	276391.5235010276	0.0006603824874121	0.1234139488186103	70390.20871387114	464.5866920305395	0.3150319546325478	0.340765023577081	0.0991655211646442	0.0268656061322096	464.5598264244073	0.1026570797892543	1.6079611021081126	240.95668684802496	276391.5235010276	0.9999251649295292	2.4862937734531325	1.0001176153486182	0.3832106138506647	0.0203769054161112	0.0011137269748385	0.0009485475843359	0.5631839985627173	7.172737633974912e-05	0.000246912299956	0.0009485323735553	0.9999903019255628	0.9999890898766116	0.9999985219415948	0.9999976367757748	-0.0564525	0.002803442799924	5.050574836178827e-06	1.000038158086784	0.9999719335558892	0.000260945827283	0.0988083840971014	0.9999859664726728	2.000076316173568	0.000246912299956	0.0005155686397936	2.5999832556785245	35922.955733917064	0.3360457603337455	26.692771485013115	106891.00020580174	0.0031150436524538	1.0035454026698098
741f2372fb9e41099d1e0b6784729414	0.05554732802451892	0.2572363793487168	5147.503373878872	0	0.059545212011941	136.92045335868903	8.859297715371437	0.1517828257466108	0.117148439846623	0.080023628935706	0.0455175198191862	8.81378019555225	0.0320057414877584	0.3215633257962026	9.130838864384394	5147.503373878872	1	0.0803649463054887	1	0	0	0	0	1	0	0	0	1	1	1	1	0	0	0	1	1	0	1	1	2	0	0	2.867560905824218	14627.461742431851	0.2938362375691901	25.894306126138527	49781	0	1
286d965010c045c7b7d646852b1cd469	0.057889599139411316	1.3113546622330745	7881.38264002302	0.0012558819013289	0.4213481251773452	218.8928380541509	27.58889380706336	0.4411049470397258	0.4461524959776252	0.1431834789938488	0.0273862368861004	27.56150757017726	0.2366845619748215	0.8127268058088398	7.41919164523268	7881.38264002302	0.9998323975541814	0.4659512865773203	1.0001582654142218	0.0001581629504324	0.0001581885557603	0.0001582397919023	0.0001582654142217	-7.91391e-05	0.0001582654142217	0.0022239444099234	0.0001582397919023	0.9999208672928892	0.9999208672928892	0.9999683469171556	0.9999472448619262	-7.58685e-06	0.0001344237039676	0.0001582654142217	1.0000791327071108	0.9996835076050358	0.0023822098241448	7.913911322159282e-05	0.9998417345857782	2.0001582654142216	0.0022239444099234	7.912630153102906e-05	3.948636439919084	1204.0266510224606	0.1009073626401659	39.053260772941854	11930.000167616494	8.380122290925818e-05	1.0002514247401944
cdc07126e1964a3f88040b50bddf9310	0.050265018227024214	0.5049936114367954	1174.6865210721353	0	0.1255691744875178	493.1893254204006	20.83945195318501	0.2433820626361914	0.2380852982438218	0.0939645857547288	0.0272348777701199	20.81221707541489	0.0694364575101147	0.6576519466016767	16.765905657378568	1174.6865210721353	1	0.3732712544559277	1	0	0	0	0	1	0	0	0	1	1	1	1	0	0	0	1	1	0	1	1	2	0	0	3.961152156821072	256.5014727540501	0.094440895712095	46.280999412199776	2716	0	1
dfa170cbb40e48e09b15dda6f5112e7e	0.09534823616983737	1.572701076625464	36438.50059943732	0	0.9581795514493502	5.510284777112282	8.9632013006237	0.8769659305111595	0.4903886362920192	0.9519109743058688	0.0200024865830093	8.94319881404069	0.3770559900307441	1.0659351141530966	0.740588794358481	36438.50059943732	1	0.3671484243072713	1	0	0	0	0	1	0	0	0	1	1	1	1	0	0	0	1	1	0	1	1	2	0	0	2.3761114329206805	13194.195198004363	0.4114186217026618	22.50962289869302	32070	0	1
6eb15b008f7547f8978731e0bd2b3ea0	0.05594057957171236	0.3131761239787568	48020.4848940021	0.0001534019039181	0.0791185655284227	47879.67185953753	167.44191756463306	0.1789632334936269	0.1486336703283942	0.0875074828722137	0.0239558376961074	167.41796172693694	0.0414018575601286	0.6343293336087743	177.12457918686428	48020.4848940021	0.9999832417214116	0.3703458645340572	1.000119876500041	0.0258912455699736	0.004315294192253	0.0007192445662064	0.0007192590002461	-9.98981e-06	0.000119876500041	0.0003406600435313	0.0007192445662064	0.9999828747857084	0.9999805605675608	0.999991538129409	0.999990778730766	0	1.6969021237552603e-05	0	1.0000599382500206	0.9999600417680712	0.0003606394602044	9.989808573898492e-06	0.9999800205833266	2.000119876500041	0.0003406600435313	0.0003596258916131	2.894669596040568	34843.0240650897	0.2919569984422186	29.67521015208288	119341.00001675842	0.000301649014592	1.000402202056258
fdeb400541434a499bce09e8a4541335	0.060536654153738705	1.3754216726382755	180504.2998417231	0.0079968042760548	0.8021232257366223	6211.938436184156	249.95484446549364	0.5771104301189676	0.5914256314904334	0.1694639591615907	0.0281361273197778	249.92670833817385	0.3379594539175025	2.278558415636525	65.37622755575781	180504.2998417231	0.9988499503057426	4.858772004915932	1.0031725560997249	0.676076282684677	0.0862320984755701	0.0130024499994427	0.0123912426923787	0.0255745506010163	0.0029137462323857	0.0170442078683325	0.0123826706475627	0.9991907777573624	0.9991197691659608	0.99991416023217	0.9997858630874712	-0.0362983	0.0218772422786873	0.0008734077413998	1.001508732697282	0.9972799525232664	0.0187629947868095	0.1102461135006869	0.9986388621154092	2.0030174653945645	0.0173421495376433	0.0063484231729553	3.048654505558507	8776.622515603878	0.2524411803032725	31.11086700985439	34727.01622227975	0.005204556544548	1.0076796962636982
001d2716a0654096bab6ec2d752e8e84	0.053192392848786914	0.4940910315925922	50.46620277900352	0	0.1259355500606396	26.09765196414439	2.8101295626649856	0.2219455040883013	0.1920510599718403	0.1087335296133411	0.0352049044347317	2.774924658230254	0.0752946947121658	0.3916538185872729	4.097312455269507	50.46620277900352	1	0.1041329068289822	1	0	0	0	0	1	0	0	0	1	1	1	1	0	0	0	1	1	0	1	1	2	0	0	3.815628564149881	29.206686930091184	0.0887741244075719	25.10067349710368	329	0	1
66d7a8f4f2914159b6e3c0f06a3350f1	0.06369455309404745	1.0963538988923316	2994.8058469657008	0	0.34825080139185	12.83751160421976	5.46568157962626	0.3963929512934134	0.3590166626938675	0.1738445439380085	0.0221076892430441	5.443573890383216	0.1844888157146388	0.6590482344559296	2.729627421466222	2994.8058469657008	1	0.2772172035043755	1	0	0	0	0	1	0	0	0	1	1	1	1	0	0	0	1	1	0	1	1	2	0	0	4.443813028865424	363.9032632342277	0.0527778481848046	40.59752026802115	6895	0	1
94b7ab8fd061417ba81ad83db22d9813	0.07447177139644993	1.469306307937634	29943.603025719494	0	1.020221013304967	5.1699223658699	6.276251312567907	0.7105190174224224	0.5215355686014704	0.6724583585883706	0.0266371890173933	6.249614123550513	0.425354420716886	0.9386601726352376	0.9926445949207716	29943.603025719494	1	0.3762456455726892	1	0	0	0	0	1	0	0	0	1	1	1	1	0	0	0	1	1	0	1	1	2	0	0	2.709084822031172	11397.513344122406	0.335368937593715	29.33188252985024	33985	0	1
3ade5593249a458893a27341c853081a	0.08872548870133841	0.4081910071660297	15099.57724304735	0	0.0885004264395213	57.99814886099429	8.10397380107129	0.2164607298976524	0.1506302171306108	0.1240052535466452	0.0529110687951864	8.051062732276103	0.0491923543005427	0.3663339609880307	5.86890986996237	15099.57724304735	1	0.0873453233853556	1	0	0	0	0	1	0	0	0	1	1	1	1	0	0	0	1	1	0	1	1	2	0	0	3.020669574220209	28468.92395680576	0.2530233653895548	37.07496600429575	112515	0	1
8236ac414897450fa99f725605e58c5c	0.059212548176097425	0.669454269966965	28217.70773097784	0	0.1203021153732152	26.06693361764435	7.978588426448517	0.2511150022091575	0.245588366773414	0.0937853572711166	0.0248810761684912	7.953707350280025	0.0814747500840924	0.4896081645648297	4.0295078594285485	28217.70773097784	1	0.1766574104740362	1	0	0	0	0	1	0	0	0	1	1	1	1	0	0	0	1	1	0	1	1	2	0	0	2.05391789404899	55974.01315912431	0.4755125870475165	21.5739398501926	117713	0	1
0f5ab09a459c41b49ac17ec049ebf701	0.06738376763395598	1.0751192175612818	1003886.8280481218	0.0031556940072052	0.2359817018576044	12596.994989582505	662.2624292131038	0.4082902158225168	0.4378403915866151	0.1202841182655137	0.0286660013291132	662.2337632117747	0.1582200199165513	5.269436812471689	108.63434084141832	1003886.8280481218	0.9996128119778862	27.60026342029539	1.0055234048857824	40.02079737758972	1.2209234402165328	0.0426265391836084	0.0282003685784122	0.1373512382712388	0.0015927908461402	0.0026776827084498	0.0281971016019505	0.9998655870017448	0.9998519491153928	0.9999765275289672	0.9999627749467508	-0.195575	0.015508132106914	3.1250488257295306e-05	1.0009578684451674	0.9996637066185096	0.0028803846253317	0.2711066748934634	0.9998318362030688	2.001915736890334	0.0027144462899073	0.0177067269405051	1.9932568284141128	18153.764949936383	0.5021232768140838	19.048886520729496	36140.00160424849	0.0417058062694313	1.0460253360623997
153e4f0c6805454fbbc6a5d84c565358	0.04705842111063006	0.7743458267052201	31022.466026271144	0.0042915749240952	0.0921258214925767	1795.7665138622226	74.9136793392674	0.2894760520359811	0.3446214075384725	0.0701466874453356	0.0249852477588782	74.88869409150853	0.0849937259345283	1.160975979653884	34.623487054446194	31022.466026271144	0.999391867186074	1.264068840630958	1.0004640981606192	0.0040391862719004	0.0016328987461124	0.0007727496692956	0.000629331359992	0.084436177006436	0.0003849677485839	0.0037060916820172	0.0006291545066632	0.999848243394276	0.9998319524868488	0.9999483451845274	0.9999159762434244	-0.0882989	0.0091794452265183	0.0001711495886019	1.000214094477894	0.9994456183569166	0.0041976362457215	0.1462530565983606	0.9997227527541326	2.000428188955788	0.0039145551352684	0.0003505202573219	2.0339794106474174	10783.958289885297	0.468541809605722	20.96604444608753	23002.00321515468	0.0006949798051957	1.0015641293013555
872edffe1bcc4017a655f35e97c842be	0.028794553605583605	0.933572610024474	96638.63431273574	0.002552129619907	0.1057466424290137	24679.29722562873	255.88990015687588	0.2546683628146188	0.3165485687903627	0.0485865952389286	0.0026776968855636	255.8872224599903	0.1088492091816863	1.39444556957332	138.36843221438124	96638.63431273574	0.999678095941062	1.8796224714839824	1.0002424866685726	0.0765756627963195	0.0080225559061687	0.0010125150206463	0.0008732090428555	0.1789412040038165	0.0001909577457953	0.001301369459699	0.0008731399976593	0.9999484435333282	0.9999418512214392	0.9999951624245712	0.999987082428646	-0.0566614	0.0064208378812608	4.091182558249096e-05	1.0001038194484004	0.9998364737068924	0.0013969806204325	0.1051019608386709	0.9999182306642538	2.000207638896801	0.0013118521983587	0.0004714310158754	2.4429750355376205	20046.42948550273	0.4033567976317979	22.696648291415908	49683.00169017485	0.0024948240683608	1.0033803497052254
9432d0edec81407bbf00f03582b12f24	0.03576547826926739	2.1481590417035408	5470.156737478745	0	1.2394171645285774	19.065606881654244	14.810580435002713	0.8602340523371717	0.768824714899423	0.4574589647901482	0.0060277974150711	14.80455263758764	0.5315294007543495	1.3528103824654207	2.668316528590147	5470.156737478745	1	1.0900933061058062	1	0	0	0	0	1	0	0	0	1	1	1	1	0	0	0	1	1	0	1	1	2	0	0	4.280236580956347	206.58849113415857	0.0691162566524451	42.912965024762926	2989	0	1
e8032a23446846b9bb70cc2bfb48d49f	0.03335326356988503	0.4574589647901482	931.0249736866672	0	0.0960842378511636	54.38793742823757	7.655863817923422	0.1964473855521943	0.2123410110944258	0.0605930876589876	0.0112216673763542	7.644642150547068	0.059900081167707	0.4628452427645858	5.744090429190013	931.0249736866672	1	0.1756341434595159	1	0	0	0	0	1	0	0	0	1	1	1	1	0	0	0	1	1	0	1	1	2	0	0	3.2620386600849924	822.2807179015186	0.1892040308102896	33.22692929097409	4346	0	1
055b9402fa70403b8f4731ccd7bc23b5	0.0799939028289023	0.3459122463601193	5859.217127183551	0	0.0743116854382868	532.4023579858575	18.6501595351959	0.1924300189869012	0.1337426149385809	0.1103391838043758	0.0687376811505388	18.581421854045363	0.040893908803701	0.3440743466885176	12.850666187682863	5859.217127183551	1	0.081357843841831	1	0	0	0	0	1	0	0	0	1	1	1	1	0	0	0	1	1	0	1	1	2	0	0	3.932582896997915	5747.400549583771	0.116127870152424	46.25342708296312	49492	0	1
8e85b642c9a547f99c5e340f529423ac	0.04845005142536524	0.9207059408891884	101.19019441481078	0	0.2470547834640874	14.216901995942306	3.4092774226074485	0.3272617631691938	0.3370091269271094	0.103292776559265	0.0364821728595474	3.372795249747901	0.1268890781446666	0.6439828503431669	3.234881273849364	101.19019441481078	1	0.3076136499035003	1	0	0	0	0	1	0	0	0	1	1	1	1	0	0	0	1	1	0	1	1	2	0	0	2.910733424621468	36.9344262295082	0.1513705993012631	4.184157484547164	244	0	1
9406163a74bc47929d1c934dcffcee05	0.11714626930742744	1.3029729845778246	28244.913856958043	0.0007613666372827	0.7963211229750278	1036.2081352611945	45.62425743049914	0.5660525971786988	0.439811823049093	0.3022280467378875	0.0590303309140221	45.56522709958512	0.326226385742139	0.8254127850330253	15.89254288314804	28244.913856958043	0.9999035191396152	0.3608907229232248	1.0000302673674757	3.0260871946820568e-05	3.0262495596820804e-05	3.026574345411001e-05	3.0267367475641635e-05	0.3846002505256299	3.0267367475641635e-05	0.0004747696552037	3.026574345411001e-05	0.9999848663162622	0.9999848663162622	0.9999939465265048	0.999989910877508	-1.30936e-06	2.5707075636859944e-05	3.0267367475641635e-05	1.0000151336837375	0.999939467701081	0.0005050370226791	1.5134089754690284e-05	0.9999697326325244	2.0000302673674755	0.0004747696552037	1.5133277732437914e-05	3.5785936118859283	7014.381431362616	0.1691965513993443	39.97230525106613	41453.00019297103	4.824043019236529e-05	1.000144728272668
3e14fe29407c47349db9e6a1dda66e20	0.04007103839594922	1.2711129044920784	2307.055458332877	0	0.2514676131964487	23.80125862119128	9.883993100878875	0.4192197894025817	0.4919679568953482	0.0971183951617318	0.0195046223675063	9.864488478511367	0.1787859229320285	0.9247153025570234	3.904443172925303	2307.055458332877	1	0.6793531589563822	1	0	0	0	0	1	0	0	0	1	1	1	1	0	0	0	1	1	0	1	1	2	0	0	4.391742540745002	147.22905856189772	0.0545697029510369	41.79121892998191	2698	0	1
8ea2f5416ca54306bf7e1cc58d401828	0.03542954035061263	0.3583558349240165	10474.9692202174	0.0010093856084222	0.0710117740747503	414.5322529987239	36.66168357948978	0.2230696918481601	0.2654410783935657	0.0597752448232899	0.016382588796194	36.64530099069359	0.0438287038275737	0.8303920752463343	14.91397874262947	10474.9692202174	0.9998683517646568	0.6397909112106805	1.000118165857364	0.0001181055059124	0.0001181205885776	0.0001181507663824	0.0001181658573642	-5.90867e-05	0.0001181658573642	0.0017056326616963	0.0001181507663824	0.999940917071318	0.999940917071318	0.9999763668285272	0.9999606113808788	-5.52685e-06	0.0001003640395658	0.0001181658573642	1.000059082928682	0.9997636909217444	0.0018237985190602	5.908670168726059e-05	0.999881834142636	2.000118165857364	0.0017056326616963	5.907915593666069e-05	3.707148587487568	2108.326969916398	0.1387878987503388	37.07225154592534	15189.0001316569	6.582411767157814e-05	1.0001974853531697
dd7ca5975f294294a562e5844f1fe07b	0.042936201366716505	1.968094625613677	7121.75798269404	0	0.6875208070183535	20.59133139175904	12.448446333126558	0.6596386384171309	0.715434102118293	0.1825788588752668	0.0202209020260875	12.42822543110047	0.3603487495438183	1.2786440733710298	3.4183550415515587	7121.75798269404	1	1.1998075330740534	1	0	0	0	0	1	0	0	0	1	1	1	1	0	0	0	1	1	0	1	1	2	0	0	4.129915690688596	331.2323232323232	0.0760404782443349	33.3218530155044	4356	0	1
29c6f8d3e6e04c51acfdd7432f951345	0.06306183213688511	0.5668381446984365	9582.131832128149	0.0006353416109399	0.1501044970694896	512.7825799829933	30.907888787700298	0.2673511115638358	0.2473212140026776	0.1100264147377602	0.0303577771900155	30.87753101051028	0.0826375422078324	0.6155161950014284	14.207600843436593	9582.131832128149	0.9999209267387468	0.3073835694546178	1.0001001936647032	0.000100153222342	0.0001001633303641	0.0001001835525719	0.0001001936647032	-5.00994e-05	0.0001001936647032	0.0014750654356547	0.0001001835525719	0.9999499031676484	0.9999499031676484	0.9999799612670592	0.9999666021117656	-4.59749e-06	8.509880694343655e-05	0.0001001936647032	1.0000500968323516	0.9997996278387906	0.0015752591003576	5.009936051265852e-05	0.9998998063352968	2.000100193664703	0.0014750654356547	5.0094304318782906e-05	3.4552164830782237	4693.081923137751	0.1855559830435612	34.764019438159195	25290.000079076388	3.953663062652636e-05	1.0001186145816858
b6e2bfc450d240ae8d4be5e6f1d69167	0.06358790258615607	1.1677443288677538	30340.110860839035	0.0005003559618533	0.2155168369586809	732.4435686010032	59.91009228637012	0.4034039660619452	0.4448311425426352	0.1128030155482021	0.0326241026691612	59.87746818370096	0.1564510978595087	0.9607317059793504	15.037852537712078	30340.110860839035	0.9999391579460286	0.7602706510394863	1.000148268592576	0.0011857954204081	0.0005929418669699	0.0002965151001616	0.0002965371851518	-3.70685e-05	0.0001482685925759	0.0011237835376913	0.0002965151001616	0.9999505771358078	0.9999406925629696	0.9999771894472962	0.9999703462814848	-3.30969e-06	6.296504135463299e-05	1.8533574071993532e-05	1.000074134296288	0.9998517396892952	0.001197917833979	3.706852850724988e-05	0.999925865703712	2.000148268592576	0.0011237835376913	0.0001482630713283	3.1114554496927918	8160.214140123513	0.2482496468048892	32.227832320495	32869.00006084391	0.0001216841079428	1.0002433756198472
dc8889f55f634d74bd975c5c59b770af	0.039739560793036595	0.7596246605062966	428181.3854170903	0.0031811322825951	0.107776840437492	12564.160854336316	297.80317982432075	0.2954288824567408	0.3551466680170282	0.0709790094333955	0.0081921083026586	297.7949877160181	0.0867787097660712	2.01067235565292	100.28524267979752	428181.3854170903	0.9996034928652052	3.955525097197224	1.0008798094421218	0.3738117710025452	0.0384622331458118	0.0045303071660145	0.0040130253578665	0.0534388541447867	0.0007192267387427	0.0037873496198461	0.0040124833967162	0.999840861472952	0.9998236474993238	0.9999804233713634	0.9999574061202712	-0.0449643	0.0084342749814639	0.0001240547768507	1.0003751706584785	0.9995108581861044	0.0040388921093164	0.1183097422337658	0.9997553945269406	2.0007503413169565	0.0037942866362589	0.0021358331309702	1.7929803292204034	58991.38543318982	0.5569849066507083	17.171522123929932	105870.0051363396	0.0047770362580153	1.006212704887076
ee6f565334d4424a89f36fc43e79d050	0.05279439128077063	0.8646018691854661	10683.69398899522	0.0007063660220509	0.1227985287625175	1055.6723631130026	42.56414972129412	0.2816464272409754	0.3018752980817273	0.0898144308451855	0.0265781615636703	42.537571559730445	0.1003313162035474	0.688911328014432	20.589007942754403	10683.69398899522	0.9999111584934236	0.3952741078890023	1.000066338236142	6.631911085729513e-05	6.63238912434829e-05	6.633345425979081e-05	6.633823614196486e-05	-3.31703e-05	6.633823614196486e-05	0.0010125758084508	6.633345425979081e-05	0.9999668308819292	0.9999668308819292	0.9999867323527716	0.9999778872546192	-2.94435e-06	5.6343520612686607e-05	6.633823614196486e-05	1.000033169118071	0.9998673307005396	0.0010789140445924	3.3170313588065945e-05	0.999933661763858	2.000066338236142	0.0010125758084508	3.316792260043892e-05	2.723973216643832	7521.467327084536	0.3341240872055678	26.82873989032447	22509.00008884545	4.442075328831829e-05	1.0001332681800008
410e6979f19640ef89409fae55ee4715	0.006543278866320831	3.0966220419438084	15718.200105747404	0.0048145928811145	1.7046078366483477	108.61005244672582	45.30309462105979	1.376787686209525	1.1582437169890394	1.052720548111837	0.0015261278885583	45.30156849317123	0.7087540543220784	2.4294939588085254	6.904213683545136	15718.200105747404	0.9992492493551144	4.006896562988943	1.0001318662477705	0.0001316399278277	0.0001316964469589	0.0001318096312658	0.0001318662477705	0.6922417450266364	0.0001318662477705	0.0016653722800923	0.0001318096312658	0.9999340668761147	0.9999340668761147	0.999973626750446	0.9999560445840766	-6.98077e-06	0.0001120088987738	0.0001318662477705	1.0000659331238853	0.999736352429216	0.0017972385278628	6.594728105594738e-05	0.9998681337522296	2.0001318662477705	0.0016653722800923	6.591896975912153e-05	3.393273895359881	492.1941419451746	0.1848269402723149	34.06444554089511	2661.00075103267	0.0003753753224427	1.0011265490048815
5ec216e098e545398110307b1b176960	0.07464990892681161	1.202478539136486	22081.378683981893	0	0.3628364242048839	41.90828978097087	18.24811517246029	0.4305100133384628	0.4066410562519753	0.1683881939339089	0.0318610743150558	18.216254098145235	0.2024320484728325	0.7633875262715523	4.101666006846743	22081.378683981893	1	0.3974216436823164	1	0	0	0	0	1	0	0	0	1	1	1	1	0	0	0	1	1	0	1	1	2	0	0	3.3271792802716096	7240.910110580349	0.1910984167897482	32.7568152965332	37891	0	1
d7e8a10b93ef43f59357225ce99116f2	0.07533687852335785	2.134739141381952	11109.012594868404	0	1.206659648532759	8.525993496650035	9.093202407975248	1.0354546475958493	0.6791605652138505	0.9759681092976844	0.0231826598869505	9.070019748088296	0.4830019557508749	1.377209841699451	1.6353838867289705	11109.012594868404	1	0.8245406208459822	1	0	0	0	0	1	0	0	0	1	1	1	1	0	0	0	1	1	0	1	1	2	0	0	3.94285104522774	619.0058050196346	0.1056864956495876	38.7077578188182	5857	0	1
dd9b3d1bf4814d298074bab67a4f9c71	0.08415405310334126	1.8258631937118928	45875.54753492475	0.0010842481060577	1.068773759242731	210.2387374809016	39.73580146425712	0.972103358404995	0.5846845629943435	0.9730050185455202	0.0173664613144345	39.71843500294269	0.4215387049149585	1.2783167587340043	6.1762984394559295	45875.54753492475	0.9998575295633388	0.6891087962379403	1.0000507593858825	5.07436879204287e-05	5.074761162714685e-05	5.075546092169593e-05	5.075938588251479e-05	0.3076669270180872	5.075938588251479e-05	0.0007681844695805	5.075546092169593e-05	0.9999746203070587	0.9999746203070587	0.9999898481228237	0.9999830802047058	-2.27046e-06	4.3111881811410256e-05	5.075938588251479e-05	1.0000253796929417	0.9998984871156762	0.0008189438554628	2.5380674220490616e-05	0.9999492406141176	2.000050759385883	0.0007681844695805	2.537871170105268e-05	2.807106284175155	8864.535085844554	0.3157560406726705	28.50530199172523	28070.000284961174	7.123521833058986e-05	1.00021372088053
e73ea439bd6d4c40a3e4e00cde15a872	0.06803817419674323	0.4550578759217047	17033.250438661034	0.0002835929373597	0.1160711300450888	1309.467569106081	43.85490111691853	0.2372674704076117	0.2019077043542598	0.1126389004337956	0.0226736747063236	43.83222744221221	0.0615606136423066	0.5277598303613485	19.802677830823185	17033.250438661034	0.9999672962145456	0.2222345860294125	1.0000103639191835	1.0363116799526398e-05	1.0363317385749734e-05	1.0363718581619588e-05	1.0363919183458452e-05	0.461533279528719	1.0363919183458452e-05	0.0001772600280674	1.0363718581619588e-05	0.999994818040408	0.999994818040408	0.9999979272161632	0.9999965453602724	0	8.802334056767667e-06	1.0363919183458452e-05	1.000005181959592	0.9999792724625358	0.0001876239472507	5.182009742565139e-06	0.9999896360808164	2.000010363919184	0.0001772600280674	5.181909441269511e-06	2.9488596784481222	16866.68335677143	0.2758067069492008	30.546186654066304	61152.00003270432	1.6351892727211297e-05	1.000049056480361
221ace2665bd4833bbe30e275496b023	0.12178720410097099	1.4743280049754124	3616.7494947689415	0	0.9320933142166308	127.30476875903766	16.67469637442224	0.7632797252155001	0.4961681553652831	0.6705295060653299	0.0694685697316688	16.60522780469057	0.3756508752952157	1.0476868798018495	6.834535164195884	3616.7494947689415	1	0.515051859183886	1	0	0	0	0	1	0	0	0	1	1	1	1	0	0	0	1	1	0	1	1	2	0	0	4.397938167391851	176.71593323216996	0.0536315427108254	34.687504541990094	3295	0	1
69d3571786d341138dc5ab58427c64a4	0.05501562460759443	1.3887150011440588	9980.850128623491	0.0015443839561714	0.8266922473882053	1123.848890772388	46.97007026250925	0.6240119101569405	0.4936274285195529	0.3958920860927193	0.0190620853965686	46.95100817711268	0.3386750376503739	1.0255894479451724	21.139470453972223	9980.850128623491	0.9997892518463868	0.6624428517187699	1.0000830033272423	8.296341752487322e-05	8.297339194690891e-05	8.299334800858214e-05	8.300332724249783e-05	0.3076508035337277	8.300332724249783e-05	0.0012007725018594	8.299334800858217e-05	0.9999584983363788	0.9999584983363788	0.9999833993345514	0.9999723322242524	-3.87152e-06	7.049865231982644e-05	8.300332724249783e-05	1.0000415016636213	0.999834008314366	0.0012837758291017	4.150415857996355e-05	0.9999169966727576	2.0000830033272425	0.0012007725018594	4.149916881277e-05	2.4100230001949456	3580.9355042681	0.3773775428673306	24.65617812554777	9487.000210770366	0.0001053740768065	1.0003161555485298
7eb48650e42840c5b25c061287b219e5	0.06801360969798863	1.1700593310507923	182563.4726838249	0.0084584622429097	0.6228008797852538	4375.214621552617	256.0135755057459	0.5774388062865851	0.4493811290938228	0.3713348007190449	0.0271545142996653	255.98642099144624	0.2569064481277194	2.963612941767985	61.280476277958456	182563.4726838249	0.9988457886777722	8.449566093609013	1.0028767560732712	1.075744054380492	0.1095704907471126	0.0131272631142585	0.0098931727092903	0.1328787187582125	0.0017919618519823	0.0076458893405154	0.0098893712844016	0.9996400650515798	0.9995994329687372	0.9999416700231852	0.9998881660279612	-0.243724	0.0377459650172431	0.0002280165163732	1.0010334831792054	0.9989078388828332	0.008601229528394	0.4266671763668151	0.9994537330810308	2.002066966358411	0.0079951595306285	0.0057551089558872	2.727133540330376	6490.277783123256	0.3122427491159076	25.864244893754908	20762.008563456173	0.0113980144452711	1.0153468680842874
df1d65f04fa644ab9f534746e8c5f450	0.041560488601070165	0.9553531729018694	2566.263246441998	0	0.2730987645848485	27.232289202351005	8.617053885671334	0.3538869343038584	0.3590471177305069	0.126979945184375	0.0158573514350866	8.601196534236248	0.1517197346442186	0.6953206779772066	4.02716252123251	2566.263246441998	1	0.358234882951699	1	0	0	0	0	1	0	0	0	1	1	1	1	0	0	0	1	1	0	1	1	2	0	0	4.080682907169951	503.17822155237377	0.0947961984838684	42.70445997538799	5308	0	1
ab984f41a0da4ee08cfcdaca720eefb1	0.062402899242743316	0.3270638882570945	296391.5570160052	0.0018160391770858	0.0755219113146024	32928.9998668604	472.5505931506552	0.2194445421475929	0.2018987199716992	0.0979662276282822	0.0323150380366146	472.5182781126185	0.0406094128856987	2.3055960256015053	167.9515404415855	296391.5570160052	0.999784794539494	5.267617126191094	1.001620545151573	4.733148676991918	0.264714596509207	0.0163439490583651	0.0153306433430154	0.032352130224869	0.0013298592911858	0.0037150235384921	0.0153288636803025	0.999824905556602	0.9998030592731144	0.9999744502180664	0.99995397461428	-0.0402553	0.0061377496790507	6.213434166639145e-05	1.0006833754804865	0.9995299146762096	0.0039500969593042	0.0929479137535936	0.999764926579186	2.001366750960973	0.0037150235384921	0.0079186481003451	2.270793459408336	25155.18275732195	0.4511573929250488	23.592066316629285	55745.00078913858	0.0070660054733435	1.0082859551267105
b0381b782f52442885458769e160e96e	0.04017179080430723	0.8315756087392265	327.4616179045905	0	0.205741490032601	34.336956464843084	10.172745260237775	0.4732653011567629	0.5993942811632759	0.0870810289257986	0.0228791723917808	10.149866087845997	0.1289434480072022	1.4087639497404905	5.356913535310131	327.4616179045905	1	1.760635820809426	1	0	0	0	0	1	0	0	0	1	1	1	1	0	0	0	1	1	0	1	1	2	0	0	3.829314748488831	15.254545454545454	0.0924517906336088	20.07676767676768	165	0	1
0bad3e78ceaa4e4295087ef0423005bc	0.07115238521759921	1.130076000018435	583.0873833409705	0	0.4417954151064694	6.380842527145907	3.265464873274251	0.4274506674013903	0.3472704595476632	0.2260176886786787	0.0178890362552338	3.247575837019017	0.2121732314160215	0.6317448558252915	1.8484328846445464	583.0873833409705	1	0.2163874897998243	1	0	0	0	0	1	0	0	0	1	1	1	1	0	0	0	1	1	0	1	1	2	0	0	3.5656720390331014	221.26420260095824	0.1514470928137975	33.88625832212473	1461	0	1
af28eba4bde74e61ba27c64a68873db0	0.08904370530115428	1.344103752649502	85800.88034311029	0.0013414323635979	0.8595810054657356	13193.401886800237	161.93839946696644	0.722035885694683	0.4365438377644319	0.7310084501352186	0.0061751876225254	161.93222427934393	0.3439162096644323	1.2979914303101714	98.26871216878884	85800.88034311029	0.9998429201154394	1.1634459329277391	1.000197170412989	0.0317229446559429	0.0044821644157671	0.0007272691653495	0.0005200136343878	0.5298999582479158	0.0001259123519208	0.0006988922976305	0.0005199811707851	0.999971132734076	0.9999670044348437	0.999992846529337	0.9999883727006248	-0.0747241	0.0029400811435994	1.413608867060694e-05	1.000072673184288	0.9999171264920068	0.0007435699403084	0.0769421390045103	0.9999585613600974	2.000145346368576	0.0007021313004063	0.0003118206999343	2.424784481870339	20641.600506607498	0.4053174250713275	21.741531543734347	50919.00039271899	0.0011191839598746	1.001629783808196
d1ef3c76026f4b128045b6737720253e	0.05135674776713959	1.6065181902801795	26037.58279128733	0	0.8622859887938128	23.36490226409928	15.548698541288422	0.9100143370656772	0.4794902412325258	0.9529332408075256	0.0047226972127989	15.543975844075623	0.3477300960739778	1.1088380326517997	1.6437279548273682	26037.58279128733	1	0.4013956889900293	1	0	0	0	0	1	0	0	0	1	1	1	1	0	0	0	1	1	0	1	1	2	0	0	2.087756825563902	10280.718657033574	0.4854662443704762	19.80354702514807	21177	0	1
9091cac136304bae8b8cbcefd4a6609b	0.05648740527894549	0.3344332360974487	24096.21426884261	0.0001413538170313	0.079509082477446	5588.273843849848	63.72347371772437	0.1846508997105169	0.1559463377708187	0.0891571196937659	0.0223433932023466	63.701130324522026	0.042934857917635	0.4298338811699284	39.336270522151466	24096.21426884261	0.9999846651638536	0.1506612106377007	1.000009974383838	7.979208674055171e-05	3.989641635677867e-05	1.994858117544652e-05	1.9948767675734192e-05	0.4615359679308456	9.974383837867096e-06	9.05479166991004e-05	1.994858117544652e-05	0.9999966752053874	0.999996010246465	0.9999984654794094	0.9999980051232326	0	4.235719156733445e-06	1.246797979733387e-06	1.0000049871919188	0.9999900256860996	9.553510861786148e-05	2.493607615691517e-06	0.9999950128080812	2.000009974383838	9.05479166991004e-05	9.974337212795176e-06	3.159133127794366	30995.014215502106	0.237653554377762	35.159987058068495	130419.00001533495	3.0669672292748456e-05	1.0000613398149072
93f86a118b604133a51b28d76f1bb315	0.05921223246582302	1.3503031630351985	7563.524510311071	0	0.5040130496646804	35.23088540609749	13.946672050116204	0.4635961111367777	0.4557730315769439	0.1616073554521992	0.0294679896495424	13.91720406046666	0.2605966291437897	0.805644109492714	3.6563426911684505	7563.524510311071	1	0.4341410768991645	1	0	0	0	0	1	0	0	0	1	1	1	1	0	0	0	1	1	0	1	1	2	0	0	4.034788765390905	1076.3678880974855	0.0923683075686506	45.2416651066261	11653	0	1
a65a06eb317e43e3ae143b76198a8996	0.06043640012102887	0.655679039252323	284.81071634440843	0	0.2017244707439246	15.88213287504142	2.792497913119169	0.2711004709251149	0.218208797352284	0.1449340442506168	0.0334651978322578	2.7590327152869114	0.0988340721548572	0.4412208226229454	3.23107561543213	284.81071634440843	1	0.1211803489802495	1	0	0	0	0	1	0	0	0	1	1	1	1	0	0	0	1	1	0	1	1	2	0	0	4.153937391161693	95.59056732740945	0.0653387336482634	24.509843863371223	1463	0	1
88e61ad5fc044fe1a960c633cc4e01b6	0.03993277889679229	1.6816293141165812	9495.788347297968	0	0.9920958329456052	8.612428084453281	8.456847740194041	0.5819937168279584	0.6072454960814452	0.1450003962818353	0.0204117539697538	8.436435986224287	0.4250575029052698	0.9570133999556298	1.860903976423926	9495.788347297968	1	0.5771579612674126	1	0	0	0	0	1	0	0	0	1	1	1	1	0	0	0	1	1	0	1	1	2	0	0	2.5775519570043155	3784.882523148148	0.3650542557048754	27.53083974997857	10368	0	1
fa12db2ddfdd4a2ab0b4eaaa6bb6f5bf	0.047351072693733724	0.3292682709693126	6984.274046933474	0	0.0486493555362786	60.70224297644047	8.739104696721196	0.1881870010160553	0.1987225975787926	0.0667114136619004	0.0146322504824576	8.724472446238739	0.0340674885712507	0.4786337187470889	6.346991141156129	6984.274046933474	1	0.1936758893702506	1	0	0	0	0	1	0	0	0	1	1	1	1	0	0	0	1	1	0	1	1	2	0	0	2.5129624298204023	11216.97848263194	0.3679266074927655	26.208340309224084	30487	0	1
41cfc5d348684f378e21171ff5d0aab0	0.0485855793531844	0.1644694016872865	439.58139965401534	0	0.0371357376166313	2651.8590405443306	13.858035906306636	0.1022414450236594	0.0601491034672594	0.067009705146128	0.0317578832934469	13.82627802301319	0.0187208175392037	0.2231330466629352	40.69111556159815	439.58139965401534	1	0.0393350434325576	1	0	0	0	0	1	0	0	0	1	1	1	1	0	0	0	1	1	0	1	1	2	0	0	3.5593555759657325	1288.6570393022992	0.1459573042589533	38.46768761513367	8829	0	1
4d3229840c77455997880696eeb96e0b	0.11356086244332683	1	32693.33268330021	0	0.3983784761024881	12.258182258890708	6.608075321297548	0.4332432196327574	0.2883619384337256	0.2934357035917878	0.0409838608687017	6.567091460428847	0.1797195162983245	0.5867057886197746	2.265702745649626	32693.33268330021	1	0.156523995042194	1	0	0	0	0	1	0	0	0	1	1	1	1	0	0	0	1	1	0	1	1	2	0	0	1.8748956166509363	51299.732429956726	0.5401279512930154	17.44714190765633	94977	0	1
89e7ce6828cb481ea4ca5c7f6877bcb1	0.04952394276425873	0.3546103843442055	1841.5996147946869	0	0.0757159784783565	396.92215907552605	19.04251487320165	0.1970605971167602	0.1935379146089256	0.0765171527449879	0.0275556320986735	19.01495924110297	0.0449862758834263	0.5168844517457502	13.56868299311026	1841.5996147946869	1	0.2283366575204906	1	0	0	0	0	1	0	0	0	1	1	1	1	0	0	0	1	1	0	1	1	2	0	0	3.5223731902471003	1047.5251704627883	0.1519694139652964	43.60888067713207	6893	0	1
f685e6ca24a246f9831ca8a5cf03e0a9	0.12022186038087992	1.5621824394168156	7437.387064252758	0	0.8804010398658777	4.952192411111878	5.955620364603182	0.8341704719209937	0.4700986497557609	0.823528182053794	0.0234802129728451	5.932140151630337	0.3561092189266193	1.01424072155091	0.8293719147252371	7437.387064252758	1	0.3328438650272169	1	0	0	0	0	1	0	0	0	1	1	1	1	0	0	0	1	1	0	1	1	2	0	0	2.590192028516329	2499.426002766252	0.3457020750714041	26.94697864476622	7230	0	1
1d7e3324fcde4427bfdef13a2aef6218	0.14010685352048088	1.2381029700086044	64384.39095736144	0	0.7947672325106923	7.174126689541583	10.851420249225306	0.5721308321356349	0.4068917469644831	0.3487059973555792	0.0739743189852621	10.777445930240043	0.3229391504711742	0.742716783189277	1.193758173771708	64384.39095736144	1	0.2242945309508133	1	0	0	0	0	1	0	0	0	1	1	1	1	0	0	0	1	1	0	1	1	2	0	0	2.887736523213996	33879.80430442866	0.2902730905046279	30.08536604774141	116717	0	1
207c8dc20b614f65ac7eab8d396e116a	0.11326227635566877	1.3578743032234672	46964.59059361072	0	0.8420856027790207	3.045956147777244	6.04309876072578	0.8425372453915464	0.4110969065045886	0.9870115631862764	0.0687376811505388	5.974361079575241	0.327059853804847	0.9729727045326532	-0.0667483	46964.59059361072	1	0.2368068738936113	1	0	0	0	0	1	0	0	0	1	1	1	1	0	0	0	1	1	0	1	1	2	0	0	2.5897062098621864	18450.507518645438	0.3719110566145018	22.01855463707424	49610	0	1
303dc6194f974bcba768f30a97846340	0.05008304168753217	0.6723425053373462	24798.844976139437	0	0.1386472545839884	31.59581905612868	8.91714911605959	0.2550327356965536	0.2628443096526688	0.0834554056391801	0.0248697266436012	8.89227938941599	0.0890101952751264	0.5262858980800877	4.375554330115485	24798.844976139437	1	0.2119351502410963	1	0	0	0	0	1	0	0	0	1	1	1	1	0	0	0	1	1	0	1	1	2	0	0	2.940383889834197	24425.96014921706	0.2728121177342357	31.06059576818528	89534	0	1
6efdf92ace7f45f4b22f86220154d583	0.04324844028737097	1.516956820094023	5718.204957543172	0	1.0681323961602431	4.183980222336865	4.67788567485604	0.6731998386854515	0.5569669742957218	0.451341921099314	0.0177866299218542	4.660099044934186	0.4477169468467193	0.936639956947751	1.017696589951022	5718.204957543172	1	0.4240963861449668	1	0	0	0	0	1	0	0	0	1	1	1	1	0	0	0	1	1	0	1	1	2	0	0	3.110608705393366	1577.0908254065664	0.2419593165705073	30.924787599303684	6518	0	1
1074b1183f07413f92070ed1b8414320	0.043108532991089646	1.6608188756461328	3096.8199513362038	0	0.8819529162558434	8.616566465494214	6.578689550621728	0.5515522695048399	0.6157986299022576	0.0979508464917531	0.0251308805550446	6.553558670066684	0.4011680502964992	0.9697551904823284	2.0838641268339257	3096.8199513362038	1	0.6362152234714773	1	0	0	0	0	1	0	0	0	1	1	1	1	0	0	0	1	1	0	1	1	2	0	0	3.210122468625746	664.0440327968417	0.2016532137251265	32.07758481328908	3293	0	1
5c42561a719f4a7f8de087e9ab82fcfb	0.040936434974180175	0.3044919537973138	2931.0841843787307	0	0.0473245580063543	147.82058369106446	13.220805995859896	0.1848032300254295	0.2038768066351247	0.0611114394965317	0.0254578083244824	13.195348187535414	0.0324708164663684	0.5450038568026337	9.430403746347546	2931.0841843787307	1	0.2628769701019139	1	0	0	0	0	1	0	0	0	1	1	1	1	0	0	0	1	1	0	1	1	2	0	0	2.713229230817414	3133.600932306445	0.3175517766828582	25.90287592738128	9868	0	1
b8687cd654ed46bf9851513229513bd7	0.06590341129419265	0.3627010892764437	4252.196425606224	0	0.0775754495205499	83.082770209242	9.110942270242775	0.2130493118465259	0.188293402855889	0.0973446928839166	0.0396792752559119	9.071262994986864	0.0438119261082872	0.4871354936845952	7.465915662999666	4252.196425606224	1	0.191910979929056	1	0	0	0	0	1	0	0	0	1	1	1	1	0	0	0	1	1	0	1	1	2	0	0	3.7074219526021417	2206.3940510073107	0.1231315392046046	44.32057524107662	17919	0	1
ce4ed416f92e4253a177cb8e72c708da	0.07747563732328877	0.3699943707718435	12907.120013600754	0	0.1020180768867537	115.81951711553434	9.306027335370272	0.2089037262680353	0.1462797407492385	0.1212866371196306	0.0399639239375843	9.266063411432688	0.0502767134325919	0.3917615779805264	8.500138972540455	12907.120013600754	1	0.1098363671331218	1	0	0	0	0	1	0	0	0	1	1	1	1	0	0	0	1	1	0	1	1	2	0	0	2.508814275500867	32869.614640062784	0.39084894575451	29.60734465485606	84098	0	1
b052356698354a9b9a13d0e65db67cfd	0.07785572766361398	1.4513246232114485	13230.256597514655	0	0.9672228923995712	27.700202501587214	16.153136224519148	0.6137768372868264	0.5266985345282379	0.2959063679789766	0.0296446990375775	16.12349152548157	0.399374495301647	0.8946928806966554	2.416700767081202	13230.256597514655	1	0.4237533447794603	1	0	0	0	0	1	0	0	0	1	1	1	1	0	0	0	1	1	0	1	1	2	0	0	3.0258205175881474	4619.489835430784	0.2794947867516205	30.897376867698004	16528	0	1
e1f4c7ce813a44d3a15481d0cce01acc	0.05559770164132041	0.6404349979356652	202.3729406807521	0	0.1876868912812133	34.163062682866034	4.70311216002647	0.2740433085561023	0.2536272084167297	0.1146708747202544	0.040643825683735	4.662468334342735	0.0929855449206504	0.5597059996170812	5.036632996964868	202.3729406807521	1	0.238171071042981	1	0	0	0	0	1	0	0	0	1	1	1	1	0	0	0	1	1	0	1	1	2	0	0	3.895242567450056	52.22600619195047	0.0808452108234527	19.75136347516031	646	0	1
0fd805ccb3b444519cfe87a5f6f83ee7	0.048537451960675895	1.261359057537475	611.6254472326677	0	0.4523417901156111	12.405879132793888	4.814764704488356	0.456939453878854	0.4532718612866611	0.1649696415384466	0.0296929815074183	4.785071722980938	0.226498882613412	0.8198267354019718	2.8032119625295477	611.6254472326677	1	0.4633222115687494	1	0	0	0	0	1	0	0	0	1	1	1	1	0	0	0	1	1	0	1	1	2	0	0	4.484440323032071	43.71648351648352	0.0480400917763555	36.84496558386668	910	0	1
32ba7453a5a04098bb45bf7396497349	0.04936626480285994	0.3653230487467181	2468.4682851267457	0	0.0682922408761078	65.35262644874184	8.123434226594114	0.1890930352754	0.1844646242627189	0.074173556991986	0.0257827944052514	8.097651432188862	0.0431771898606983	0.4438343500260961	6.5600822832826005	2468.4682851267457	1	0.1612327542734234	1	0	0	0	0	1	0	0	0	1	1	1	1	0	0	0	1	1	0	1	1	2	0	0	2.554246869628318	3632.837842151464	0.2899080553947382	28.053014762316916	12531	0	1
cf03ba924fad40f0828ff3d9894d8890	0.05334105019208235	0.7180798537939995	5151.854724732809	0	0.13048202991786	37.46908635137056	10.772840310781362	0.262661056255791	0.2711257158770577	0.0877959612621701	0.0287227201318937	10.744117590649468	0.0905170882015454	0.5364821647674457	4.436316330390692	5151.854724732809	1	0.2188222826401568	1	0	0	0	0	1	0	0	0	1	1	1	1	0	0	0	1	1	0	1	1	2	0	0	2.9621278759166927	4182.125027932961	0.2336382697169252	28.995791966542868	17900	0	1
3d2a0286f4a44ba4ae1585d1a35d5a2c	0.06597997218628712	1.5983940036267532	49139.63245613988	0.0004431750965271	0.9768125703696257	296.3878455071461	40.73901210155921	0.9060382696043614	0.5100170988683647	0.9940432975587092	0.0215875564530686	40.71742454510614	0.3822704921833068	1.1440365445614251	6.322217682563563	49139.63245613988	0.9999467320087738	0.4879142693043811	1.0000591280991986	5.911409932705697e-05	5.91175987763551e-05	5.9124598919569706e-05	5.91280991986257e-05	-2.95649e-05	5.91280991986257e-05	0.0009157514819585	5.912459891956971e-05	0.9999704359504006	0.9999704359504006	0.9999881743801604	0.9999802906336004	-2.58701e-06	5.021952164214334e-05	5.91280991986257e-05	1.0000295640495993	0.9998817490520212	0.0009748795811568	2.9564924694796835e-05	0.9999408719008014	2.0000591280991986	0.0009157514819585	2.956317452954885e-05	2.1686755333780834	17863.390038620324	0.4757861243473251	22.04826540268693	37543.00005326941	2.663399561313036e-05	1.000079904115062
6653a3a2749d44c694159eccab67063c	0.06749522927587763	0.5925820552822689	35739.193715007044	0.0008646702853727	0.1745032865221599	16511.11575309997	126.98218499349422	0.2740999209339975	0.2362180808363138	0.1266603794821065	0.0317125983742642	126.95047239511996	0.0898085085650092	0.7712524748039826	100.22785392931456	35739.193715007044	0.9999001414663669	0.5196996132352443	1.0001457020703812	0.014147505391885	0.0026420056379087	0.0005261406726675	0.0004311963137163	0.1443912115197146	0.0001108147114446	0.0006794849798244	0.0004311803873524	0.9999732436842949	0.9999699889106468	0.9999923579049392	0.9999884535588656	-0.147332	0.0057337255763599	1.8110852738908167e-05	1.0000609805609788	0.999919963980526	0.0007222542844868	0.1857239205529006	0.999959980747244	2.0001219611219585	0.0006822350317316	0.0002393342465959	3.168004528483828	14285.200123162958	0.2377577704702321	31.71067930479293	60077.00019972371	0.0004992915601226	1.0007656075761864
682f90a8514d49c397c2b46ec8f62132	0.06243839872638404	1.8200602945728632	2272.147624698297	0	1.0656079713432902	6.871513690453652	5.578487560285409	0.7782879684149681	0.6261987742010596	0.5067193607553039	0.023474576370717	5.5550129839146924	0.4501901745346693	1.116413136393788	1.644993504971914	2272.147624698297	1	0.6406461293331173	1	0	0	0	0	1	0	0	0	1	1	1	1	0	0	0	1	1	0	1	1	2	0	0	3.8468432558665615	204.92978606692265	0.1124134865973245	36.31520803387206	1823	0	1
b9d0e52b00494f828dd52944bbdf4272	0.0755098908110278	1.282798749558829	28093.59929486302	0	0.4766213242032936	36.22661807295838	15.479032321505066	0.4532950434040556	0.431191735775873	0.1647183901202777	0.0339582818600217	15.445074039645045	0.2522867105138908	0.7619174702635512	3.589847247790928	28093.59929486302	1	0.3750418351181248	1	0	0	0	0	1	0	0	0	1	1	1	1	0	0	0	1	1	0	1	1	2	0	0	3.433657312442887	8556.20415754019	0.1768029953618256	34.63326635915571	48394	0	1
e3be3d7cf7a04bbea02c9192f4845039	0.10009791541873482	1.4002071660499475	100535.26278302875	0.0009725286178624	0.8691799725744773	6087.408665467359	98.17899949892136	0.874746610776653	0.4468825828353635	1.0027404979228949	0.0301882427026106	98.14881125621876	0.3401048033155581	1.1977132846906096	55.217995860490674	100535.26278302875	0.9998858541146	0.6693354792591274	1.0001225542200134	0.0040664686043683	0.0010422411931377	0.0003067113057812	0.0002372622708638	0.3028666649057461	9.361096153498646e-05	0.0007171567646543	0.0002372499248511	0.99997196217649	0.9999675596501656	0.9999898932814882	0.99998547484437	-0.0582843	0.0024641480175035	1.6783771273198044e-05	1.0000525941324632	0.9999127231696076	0.0007821712744465	0.0769431273889179	0.9999563600522676	2.0001051882649263	0.0007396890570538	0.0001359933941612	2.2180538516640635	31835.05305138193	0.4542478639810215	22.292676484693786	70075.00031391351	0.0003281658066515	1.0005850206184097
5c464932c9aa4100b65530494c494da6	0.03894506919212942	1.1034682407047698	50895.84319561008	0	0.3097888609303829	32.871501709808975	20.430717104935717	0.3540214971780577	0.3866487753848153	0.0934780429480002	0.0142961275205152	20.4164209774152	0.191543724752206	0.681901067520742	3.635315885692101	50895.84319561008	1	0.339657845421734	1	0	0	0	0	1	0	0	0	1	1	1	1	0	0	0	1	1	0	1	1	2	0	0	2.611293380654402	37588.11794693759	0.3434084741534277	27.80311778153974	109456	0	1
7757717d67db41d3ae632ac0b113d2fb	0.039313545828368476	1.896989814146924	76407.49678464083	0	0.93794058729471	30.529315354769217	23.72423436927972	1.0437849963875576	0.5823286712390563	1.0175749201808355	0.0054419736807622	23.718792395598957	0.3952429555903283	1.3360751340724304	2.632386859440611	76407.49678464083	1	0.6956096452028894	1	0	0	0	0	1	0	0	0	1	1	1	1	0	0	0	1	1	0	1	1	2	0	0	1.9106120806958555	20894.99341167675	0.4881665633641743	19.65657029207784	42803	0	1
78a7cda2417f48cb82b7f677a264b26a	0.13904363009255968	1.5426252526674875	65569.24137602143	0	0.5346249313526231	22.23885071998192	12.888688930496894	1.0083328251556731	0.394225588846413	1.062653433936309	0.0157881058234314	12.872900824673463	0.2547380623247271	1.1524638534021736	1.5265822808915142	65569.24137602143	1	0.3114378471121651	1	0	0	0	0	1	0	0	0	1	1	1	1	0	0	0	1	1	0	1	1	2	0	0	2.5758384955063103	18444.20912331875	0.3736065695049171	23.00217867112052	49368	0	1
f1ee470dd0cb4f64a8542cbcb7ea37c5	0.0351694441669861	0.3842542817952489	7827.144089474827	0	0.0724585408393896	144.89485466006818	18.00141630655992	0.1801232995477196	0.1918470247286774	0.0600192190174255	0.0169843186832847	17.984431987876636	0.0470364794557483	0.4444888505073875	7.745161723037337	7827.144089474827	1	0.1651259351854211	1	0	0	0	0	1	0	0	0	1	1	1	1	0	0	0	1	1	0	1	1	2	0	0	2.81442558985891	10703.268924956456	0.2701685873477663	29.35423067954825	39617	0	1
0721198953fb4f679986581ad00281f8	0.003958855718094532	0.1301657979590771	105.96128824206744	0	0.0299165230833355	122.24240765808932	4.975429493119048	0.081616552406535	0.1114137166287998	0.0115601091881204	0.0012144520401654	4.974215041078883	0.0186771486413947	0.3070368198706594	9.4208674922088	105.96128824206744	1	0.087610347129559	1	0	0	0	0	1	0	0	0	1	1	1	1	0	0	0	1	1	0	1	1	2	0	0	3.761286240900336	130.5409252669039	0.1161396132267828	36.92731538354377	1124	0	1
387901ac720e4be29ed8afbc961d780a	0.1199450753828629	1.422773271417753	7819.366576799014	0	0.9022688061991038	2.7105375360483017	3.4836480211598144	0.7921549279325368	0.4516440290995128	0.8653730120181501	0.0496126390743283	3.434035382085486	0.3648726781668411	0.94962293209394	0.355190864248215	7819.366576799014	1	0.2742742833108889	1	0	0	0	0	1	0	0	0	1	1	1	1	0	0	0	1	1	0	1	1	2	0	0	3.0930345931655507	2296.107138738323	0.2648030375664079	31.572667291612568	8671	0	1
6f2e5220c296457c8a68e7bb750ae4fd	0.12364804747004123	1.0654652290843	27938.999920036	0.0002459099460834	0.2818538603208088	7859.77548685168	75.95204901155167	0.3873894330215637	0.2989147487305688	0.1936106858569198	0.0600393753377341	75.89200963621393	0.1725453912298953	0.6253797639021512	52.168931450675146	27938.999920036	0.9999720036955176	0.2410292762815416	1.0000618917234945	0.001670926136867	0.0005569879113123	0.0001856709926224	0.0001856751704839	-1.03154e-05	6.189172349464178e-05	0.0003496106715159	0.0001856709926224	0.9999845270691264	0.9999814324829516	0.9999925729931808	0.9999911583252152	0	1.752207648574738e-05	2.2922860553571027e-06	1.0000309458617471	0.9999587395473136	0.0003702412460138	1.0315403301993036e-05	0.9999793694255016	2.0000618917234947	0.0003496106715159	9.283654077659068e-05	2.625273804706423	25292.58069347817	0.3540543512952415	23.82068914709001	71435.00002799669	0.0001259833701704	1.0002099752229237
99c159fc9acf49a6bb21e775e8963c10	0.061685667790571885	0.3533110490731845	59.221417881930186	0	0.1209811101894456	27.751434886459645	2.138911429963488	0.190078102474954	0.1286253102055182	0.1175566225841702	0.0324183093270883	2.1064931206364	0.0570201548685462	0.2981963243750097	4.376699238097737	59.221417881930186	1	0.0527913628302869	1	0	0	0	0	1	0	0	0	1	1	1	1	0	0	0	1	1	0	1	1	2	0	0	4.211211294944792	41.84384384384384	0.0628285943601258	30.65562860157455	666	0	1
a096b57eb46a41a19870beb1f91f2fda	0.06264594039305278	1.079373031387624	221407.65694624677	0.0015003303646445	0.1940573691119488	40561.19052414142	427.3267677727429	0.3416648032445836	0.3628463728795157	0.1026200594566053	0.0303223660402824	427.2964454067026	0.1646194473897512	1.98761266691101	189.0682306797386	221407.65694624677	0.9998215789554628	3.833869275888936	1.00048068524435	1.2742810863644596	0.073601641181236	0.0044932015870995	0.0040535667783367	0.0786985058001124	0.0003496569695366	0.0013395956910697	0.0040534069323455	0.9999468066318548	0.9999419109146582	0.9999928179963964	0.9999874105919112	-0.135811	0.0091204768784208	4.161675573228345e-05	1.0001853660422104	0.9998358407309084	0.0014543520789143	0.1976371130481604	0.9999179161411764	2.000370732084421	0.0013707476405685	0.002136692091359	2.1240049023065475	26373.942009849405	0.4705934981416281	21.42259899935571	56034.00057097994	0.005549012348297	1.0064413674969668
0044d2b94b9644e5bee228ee4bfc247d	0.039494960279983234	0.2223626418587555	269.90181526532484	0	0.0583043733426966	67.2731736777928	3.52164870887755	0.1189861663752458	0.089343717131879	0.0656955783903537	0.0208728183195538	3.500775890557996	0.0293338772907362	0.2207033004021382	6.558910183122745	269.90181526532484	1	0.0345522390197187	1	0	0	0	0	1	0	0	0	1	1	1	1	0	0	0	1	1	0	1	1	2	0	0	3.3890924979917005	1100.2633098718643	0.1985676430015997	36.151346717897376	5541	0	1
6975942bca8c4b818663f1058b464590	0.05826631597189046	1.2720814382159216	3862.651577652022	0	0.5018186607673161	12.42670924044418	5.7244417170792055	0.4759392111664622	0.4379418389692073	0.2086155188072961	0.0261761315950357	5.69826558548417	0.2417340958164122	0.7944508912265074	2.68273815985839	3862.651577652022	1	0.4046340858448375	1	0	0	0	0	1	0	0	0	1	1	1	1	0	0	0	1	1	0	1	1	2	0	0	4.261798157314407	378.63594771241833	0.0618686189072578	31.49288083643044	6120	0	1
07056023e7e540df922495e68e6b9eb6	0.048572164762903436	0.1988463242148049	2610.9355159738834	0	0.0464351001613133	1121.9056378535	19.540742193410807	0.1247313219702111	0.0914574903799144	0.069783739943591	0.0233159462865897	19.517426247124217	0.0239961148631254	0.2942269191841713	21.973619656593485	2610.9355159738834	1	0.0710115772921723	1	0	0	0	0	1	0	0	0	1	1	1	1	0	0	0	1	1	0	1	1	2	0	0	2.744831871988768	9186.393700265253	0.3045886505392988	28.565050517487634	30160	0	1
599e8b692d4143a5bd22e74fa3d7d583	0.030998884519789296	0.3648819427507037	260051.19288499255	0.0144214981020496	0.0735161016118892	3659.206502395671	278.141108976488	0.3133976242752975	0.4291778631410181	0.0569627504095393	0.0143361005434164	278.1267728759446	0.0442442241060143	3.74974951229731	54.79523105033134	260051.19288499255	0.9978387442563004	13.962403334072514	1.0078953635355852	4.367899591916008	0.3906593396603529	0.0403685090703358	0.0336873672612167	0.0885157468723557	0.0056770610071032	0.0246118197231608	0.0336549847036699	0.998724577687115	0.9985790251752308	0.9998482622302804	0.9996660536197702	-0.104189	0.0493393259987086	0.0009898091889969	1.003107702064067	0.9960131239179616	0.0273329234282426	0.2501073171504021	0.9980043085504142	2.0062154041281346	0.0251311214040716	0.0185139690828881	2.666486655850537	5583.323655041903	0.3018828686154043	29.55758424586085	18455.027575020275	0.0191842004308976	1.0255744795890782
968f10063d9e402db7d0fbaeec3d195d	0.04389687440599758	1.5831226084245942	123644.15496618128	0.014483933463784	0.701939745990108	4006.1250502334574	267.5636044668119	0.6655721664755476	0.7077783813769074	0.1970018403231374	0.0194188265321169	267.5441856402798	0.3314370889657581	3.3829416547943607	54.4386975212758	123644.15496618128	0.99778022825613	11.00130793095585	1.0069138612555748	2.647017042215309	0.2809762471344675	0.0340828768222061	0.030531784752145	0.0544024478451857	0.0053350885733762	0.0240018008624904	0.0305028059717437	0.998751218467029	0.9986148170665778	0.9998424432983044	0.9996616446619144	-0.140076	0.0552506209075785	0.0010526627636611	1.0030084728412834	0.9959119901335712	0.0276407177757441	0.32109764671106	0.9979535893062276	2.0060169456825663	0.0253403499355504	0.0161536653935878	4.086298558364499	897.2776749352092	0.0830505067507598	35.6980447339358	10780.01758607923	0.0128584004498176	1.0182339874120696
ebb1f3fb68b146039d88b5d354ce3dee	0.027870174390254573	1.9924769948991756	4883753.772396981	0.0686554773974918	1.064014301276426	2524.7344241546957	1920.4448187871756	1.9165881943435088	2.592441051253687	0.2749525950627928	0.0094847848809713	1920.4353340022944	0.4712698207459919	34.37511638199327	48.12003992220976	4883753.772396981	0.9879477960288356	1177.975315968885	1.241095837359156	24729.7838378237	320.8860626955614	4.548797249549057	3.979253198985077	0.0656924368401148	0.0892536451757267	0.1240679968043007	3.971027656191362	0.991843605750683	0.9909283408285268	0.9996092432843756	0.9992100269998924	-0.110322	0.1188120443687109	0.0052089829719502	1.0481607289273975	0.9757166010353244	0.1399726478411287	0.4377500404402176	0.987773903275531	2.0963214578547955	0.126869509588713	2.132012612133533	3.3358342569426336	760.5731913864021	0.1840244837615296	33.34458893379923	4083.188240987176	1.8348463082309951	2.9223324461650133
39c5b5fad7b244d49e4f94f8e45f0c5d	0.042149406882772085	1.61190384988074	23886.14292811569	0	1.0718817185908067	8.957892983983259	10.881672794975486	0.7330849196254744	0.577052536818633	0.5966714034028399	0.0157550204048233	10.865917774570663	0.4420857895252385	1.029222732742628	1.598494727010878	23886.14292811569	1	0.521885934211915	1	0	0	0	0	1	0	0	0	1	1	1	1	0	0	0	1	1	0	1	1	2	0	0	2.394598021256498	9359.565346578562	0.4150767371758642	22.05386837903457	22549	0	1
52e5b2178fb242bb9edc7e468c4467fd	0.02341650217169131	0.9743970810423914	154.49141824317445	0	0.2189871960484232	19.293606610929203	4.806234324803903	0.3152009343973761	0.361493251247816	0.0819574791552044	0.0133893083302515	4.792845016473652	0.1325799551939249	0.687350580355846	3.6624801706876857	154.49141824317445	1	0.3730991912705392	1	0	0	0	0	1	0	0	0	1	1	1	1	0	0	0	1	1	0	1	1	2	0	0	3.873264738803068	25.287461773700304	0.0773316873813465	14.021453487828374	327	0	1
df0687927b86489e98c85c89d34a3ac4	0.03929426784505119	1.1347435661829766	3330.405953966403	0	0.2407229990285271	32.69430003297635	10.610130530405002	0.3650390376941446	0.4181325954110568	0.0871625570602317	0.0196061215797747	10.590524408825226	0.168725352640034	0.7815750076973293	4.270774321129267	3330.405953966403	1	0.4776059936164134	1	0	0	0	0	1	0	0	0	1	1	1	1	0	0	0	1	1	0	1	1	2	0	0	3.826687959168332	619.6863536316948	0.1136622071958354	48.759164352511	5452	0	1
fca38406549e4f3d9c7a05a66dae74a2	0.05293106044409669	0.2884240066348308	8333.31969459828	0	0.0573796516723769	122.55858072539314	11.060303485916275	0.1843108280896988	0.1734350273005654	0.0802714892442585	0.0280070484840988	11.032296437432176	0.0325081437620408	0.4881798333675995	9.054630065029128	8333.31969459828	1	0.2043490683557067	1	0	0	0	0	1	0	0	0	1	1	1	1	0	0	0	1	1	0	1	1	2	0	0	3.265643760034559	6844.857008036149	0.1957519091725383	35.80795022543916	34967	0	1
07ef4cb6abe9438cb3f6fa68c6c083ce	0.01230778761399976	0.1858611362542165	29.903531696440535	0	0.0495202303187215	15.372997609353057	0.9198327822367512	0.0741585008467477	0.0738678566562064	0.0272236028375906	0.0084945067114655	0.9113382755252856	0.0272304260154045	0.1439554382050274	3.339369218754806	29.903531696440535	1	0.0152236849409643	1	0	0	0	0	1	0	0	0	1	1	1	1	0	0	0	1	1	0	1	1	2	0	0	3.951993149551277	146.75744975744976	0.101703014384927	40.51297035080819	1443	0	1
f5ec4d07545b460f9d333103b2fd49c5	0.023325185629488602	1.1528678112381836	42314.55705407076	0.0035252525309223	0.9369376801150564	4360.34501627625	93.53319556587238	0.4565448135700358	0.4470492035225836	0.1624862201829053	0.0122131577380508	93.52098240813432	0.3706708730912822	1.1895433063256204	57.27911203825087	42314.55705407076	0.9995319090109216	1.2065801108263905	1.0004920043266727	0.0123832741749389	0.0033514290101366	0.0010305405883813	0.0006078619503406	0.2797539497398085	0.0003061816191167	0.0027915799430868	0.0006077408801142	0.999889065047319	0.999877077223564	0.9999716316873998	0.9999478912074088	-0.270553	0.0209363339393151	0.0001189398690457	1.0001931444699732	0.9996183492245608	0.003090173122314	0.3434960499983231	0.9998091491787032	2.0003862889399464	0.0028888171094334	0.0004096006346804	2.6949934102004445	10448.412185660782	0.3493984813289453	26.535701720984235	29890.0022070626	0.0009695809450952	1.001839218833601
5244496abd684865b65aee8d1db6c88a	0.1052980800812371	0.8690129024096218	4962.728771826971	0	0.2847816413377287	411.9881683401279	22.305915385653933	0.3851211124063779	0.2965490018046981	0.2066781135347889	0.0643446515837117	22.24157073407022	0.1376559150658138	0.6779044731063206	13.13695101953408	4962.728771826971	1	0.3112362034364321	1	0	0	0	0	1	0	0	0	1	1	1	1	0	0	0	1	1	0	1	1	2	0	0	4.451168811466401	556.7849800907492	0.0515589387990322	41.92275256801025	10799	0	1
a553a3921a3a4f88a4f7b0611be062e0	0.09190155683966143	1.4767709824137305	169210812.10455975	0.3049376964487464	0.261324372707176	300.3429092512621	3375.999999999998	11.136335017803413	20.652031806536588	0.1423751678822928	0.0504635336631487	3375.9495364663358	0.2139119915535211	111.37174704133112	15.67745080188348	169210812.10455975	0.9471223330607478	12279.648081409492	7.185791043266186	446179.0065963312	4538.690031495053	56.939298488822445	37.35556597013351	0.2091450600372188	0.7940447633480463	0.5186779724191589	36.71082524609123	0.9614341269367844	0.9583472473839492	0.9983992433872484	0.9955388250525548	-0.27655	0.4264408593472488	0.0129059187386496	1.5125828194562376	0.9026583601773136	0.640772095653226	0.6362262954391437	0.9500307333546606	3.0251656389124757	0.5466657890300709	23.57371611473896	3.793568691930599	2015.3121243219468	0.1477284946724781	42.7420180023484	12920.64286761472	19.276399661858186	21.26755607682158
04093a3032f7404390805ba5913ec1f8	0.03389736683777057	0.2022985990995424	1997.8921160454536	0.0049029128976927	0.041191513804582	337.6864616528076	25.527490811568644	0.2016421666071245	0.2538363388502396	0.0539253902103498	0.0203959881543691	25.507094823414278	0.0227813817970351	0.8750824559616492	14.49460640442612	1997.8921160454536	0.9992337165876706	0.7251097413778566	1.0006970837580829	0.0006951189334909	0.000695609262085	0.0006965920252499	0.0006970837580826	-0.000348665	0.0006970837580826	0.0083093666602409	0.0006965920252499	0.9996514581209588	0.9996514581209588	0.9998605832483834	0.999767638747306	-3.89377e-05	0.0005921528219647	0.0006970837580826	1.0003485418790414	0.9986065700830836	0.0090064504183233	0.0003486648561714	0.9993029162419172	2.000697083758083	0.0083093666602409	0.0003484189458331	2.6992687343104462	775.3150632426217	0.297169437808594	26.67975479518446	2607.0007665772328	0.0003831417061646	1.0011498658489844
40f2fd452d2b48ba904498e8fa6c0134	0.06470974772507442	1.275610184863851	7319.809040313604	0	0.2315566313094407	25.797337733312457	9.949188488733842	0.406480613719165	0.443258352932873	0.1155559483974162	0.0350665465693956	9.914121942164446	0.1873868931149811	0.8104557800748369	3.816570143751736	7319.809040313604	1	0.4916120821272034	1	0	0	0	0	1	0	0	0	1	1	1	1	0	0	0	1	1	0	1	1	2	0	0	3.226758864255029	2395.662060301508	0.2149732645640261	32.51579479800809	11144	0	1
648ec2a945574716804b29cd036d1268	0.04701377452773235	1.6522716861222253	48375.58582031872	0.0004565179386027	1.1649533297077097	385.935746120992	48.451786137101074	0.8478139494833945	0.5917021991051195	0.9118937130050138	0.0153328041654592	48.43645333293561	0.4678269356369731	1.1536943932730683	7.506617401766147	48375.58582031872	0.999944973312098	0.6122222601310816	1.0000210703170245	2.1067748261004983e-05	2.106839040283231e-05	2.10696748041039e-05	2.107031702434312e-05	0.3076817723732382	2.107031702434312e-05	0.000346512302542	2.10696748041039e-05	0.999989464841488	0.999989464841488	0.999995785936595	0.999992976560992	0	1.7895607516536532e-05	2.107031702434312e-05	1.0000105351585122	0.9999578603292816	0.0003675826195661	1.0535319069508595e-05	0.9999789296829756	2.0000210703170245	0.000346512302542	1.0534997957111752e-05	2.3139314180636554	15974.000687852524	0.4395102679282576	22.346330571457354	36343.0000550282	2.7513343950998023e-05	1.0000825423029305
76d3c378aef0488fa1ebaa0aafa902e2	0.039804708302306535	1.389516896234361	9264.14841141003	0	0.7923203518787156	10.748536852791837	9.527812613883068	0.4830022855402705	0.5079740394359195	0.123505640981791	0.0154129254344413	9.512399688448626	0.3449190970708302	0.810115472819027	2.1091784073459223	9264.14841141003	1	0.4229958714636705	1	0	0	0	0	1	0	0	0	1	1	1	1	0	0	0	1	1	0	1	1	2	0	0	2.5372326503669957	5386.867809577784	0.3816143248496588	23.72878576175816	14116	0	1
2a769fc75cfb4ecdbbf2dde8c8f3c920	0.0768129877467064	0.914727863769602	8334.033491598319	0	0.1551454811276727	22.570955404242195	8.809126026729793	0.3065905239435748	0.2919931437524999	0.1174538695874858	0.0402005280281941	8.768925498701599	0.1104448665708534	0.5618461796285621	3.596728798890492	8334.033491598319	1	0.2216733801912146	1	0	0	0	0	1	0	0	0	1	1	1	1	0	0	0	1	1	0	1	1	2	0	0	3.637207524086751	3815.448543615772	0.1445190918380278	36.912157517175935	26401	0	1
335b79553a3f4a5e893372456ea9fd87	0.12670384890577097	0.5391410726916882	55744.34683219143	0.0006974010879894	0.144646444071942	21930.64791601413	125.9568900708806	0.2892126387394912	0.1682612120354371	0.1921224615197611	0.0543805127414861	125.9025095581391	0.0711845179455417	0.6680443391882943	125.31713162554448	55744.34683219143	0.9999199433840276	0.3626392887148655	1.0001308098158346	0.0085351619016792	0.0016887545008763	0.0003841854620662	0.0002826473185248	0.1174255092810163	9.126428058715288e-05	0.0005981516047806	0.000282636730146	0.9999756712491756	0.999971135148328	0.999994239658543	0.9999897826716678	-0.11716	0.0050003847536941	7.413678447153411e-06	1.0000527109307238	0.9999293811496732	0.0006484022021933	0.1563739386202793	0.999964689669163	2.000105421861448	0.0006138791061869	0.0001667081951477	2.829343752734615	37464.60500528389	0.2999375941115372	33.60593786356505	124898.00028821212	0.0003682584850057	1.00059243603292
8894774db7c046da91ba50c53a9e8e01	0.06593000014818362	1.4457055544564208	27077.574286567717	0.0006190958246261	0.994708732920972	197.72931427117612	27.83909007233632	0.8130777820684916	0.4861284356115151	0.9442120348649824	0.0233895849861026	27.815700487350217	0.3936231004041967	1.0200807257545184	5.491768178245556	27077.574286567717	0.9999231449103853	0.379469207362447	1.0000259052122558	2.590084680280233e-05	2.5901938051010456e-05	2.5904120823551035e-05	2.5905212255844e-05	0.3846024317363929	2.5905212255844e-05	0.0004139136866805	2.5904120823551035e-05	0.9999870473938722	0.9999870473938722	0.9999948189575488	0.999991364929248	-1.10067e-06	2.200208798494686e-05	2.5905212255844e-05	1.0000129526061277	0.9999481912126368	0.0004398188989361	1.2952878991618728e-05	0.999974094787744	2.0000259052122558	0.0004139136866805	1.2952333269848756e-05	2.1686997120879936	12476.157174698332	0.4794465135154228	20.18104146293245	26020.000076858043	3.8427544807409225e-05	1.0001152870647914
8e250662599e4333aef337b79984b59e	0.09826846106774302	1.585966463449858	18865.38114424089	0	0.7252146736531307	11.011946388379211	8.839493321088659	0.9743246831495476	0.4486866873679829	1.039485845791983	0.0155871644861374	8.823906156602522	0.313764256824332	1.150279782765664	1.204172122709632	18865.38114424089	1	0.3738349904449565	1	0	0	0	0	1	0	0	0	1	1	1	1	0	0	0	1	1	0	1	1	2	0	0	2.7675921192080253	4659.307195960163	0.3267854675242083	25.841104144902665	14258	0	1
adad1cba18c3409382dec83f7e7dccd0	0.0695475855990684	1.3795793467724533	32233.319825497823	0.0029883171853692	0.7360918774555569	4463.944703069215	107.03655385299528	0.5438204533295854	0.4934586494124528	0.2312535900190578	0.0308823363257409	107.00567151666952	0.3207049381001046	1.4821025732787958	59.49098286040887	32233.319825497823	0.9995911785517528	1.900887352260032	1.0005107382096727	0.0297054951314115	0.0072058935476488	0.0017898115681118	0.0016560851884433	0.1130563463875644	0.0004604890576269	0.0022843476674666	0.0016558284180812	0.9998905713130692	0.9998758404139296	0.9999584752172962	0.9999455088102996	-0.07693	0.0046071394558439	6.0478044047715256e-05	1.000238619387488	0.9996852345966584	0.0024417502630519	0.0769975952926539	0.9998425974044144	2.000477238774976	0.0022843476674666	0.0008614741891387	3.956042011154344	1458.211939484803	0.0993738544013086	45.20402294051656	14668.00095406842	0.0022484993888994	1.0034755349597928
368b55db97c14a0195e9107bbbf1d148	0.19803754284838584	1.349153680902094	57243.32324206639	0.0018253410730999	0.6931239434567658	1820.151088201467	50.11945986687984	0.8687665153211533	0.3693164080880397	0.9610261592769752	0.0662811895953236	50.05317867728452	0.2775711270689271	1.0736517453441976	28.90673864652084	57243.32324206639	0.999758377102134	0.3979728121373824	1.0001200173429703	0.0004381561557819	0.0002543687872642	0.0001624904881839	0.0001486040529709	0.1076505284694121	0.0001095899230273	0.0013806473324845	0.0001485891462647	0.9999517073934768	0.9999491064514806	0.999986940246854	0.9999745532257404	-0.036833	0.0027201911720669	7.545255932667839e-05	1.0000582707681616	0.9998128974596564	0.0015259132983908	0.0513227491150582	0.9999064413352968	2.000116541536323	0.0014310427121888	7.777363528872117e-05	2.7061223070892995	16868.3148472583	0.3396829345588574	24.04917425766176	49647.00124851487	0.0001812161596186	1.0004631587426247
4f2255d9e23f41abb6b278c8fb6984a0	0.03587307358576121	1.4890491816854086	80259.395824882	0	1.109755558963977	4.665938153837963	9.86795119833771	0.7656656150792557	0.521459870713508	0.8499541024048669	0.017872189655301	9.850079008682409	0.4286447043813989	0.9827066946999412	0.6377978938771849	80259.395824882	1	0.3794686136933883	1	0	0	0	0	1	0	0	0	1	1	1	1	0	0	0	1	1	0	1	1	2	0	0	1.8505010525362613	45812.18622531856	0.551230146257548	18.50233724309112	83109	0	1
943fe26d76ac4c0e910b166958dc3b62	0.10236512122255786	1.0827534624977049	29050.198523444808	0.0015891010127958	0.447313870230176	3430.043191036596	60.01688249312161	0.4340605105391525	0.3266887105939108	0.2467626187722973	0.0662811895953236	59.95060130352629	0.2103636096674448	0.767293955571281	43.39908433480448	29050.198523444808	0.9997973526157584	0.400331487446713	1.000211605324801	0.0018201571541159	0.000730664254412	0.0003395419945638	0.0002443612596347	0.1199961941756867	0.0001620861592564	0.0018501790769115	0.0002443347473345	0.9999326694371016	0.9999271844304096	0.9999793611863618	0.9999635922152048	-0.100975	0.00913251828172	9.00954464255244e-05	1.0000939004168108	0.9997506255396538	0.0020557696746948	0.1489477519611047	0.9998753029656936	2.000187800833622	0.0019295587258406	0.0001459758135496	2.8841054660386245	14467.21145856555	0.2931968355909765	29.799592899611586	49333.00077011937	0.0002229091654609	1.0005066574792778
5f601d32662f41c78eea19f329e1886e	0.04070646104579492	1.324782380063274	7259.297028358626	0	0.4764003233572136	9.222011906021022	7.013972500694852	0.4154085918916985	0.4515790759947721	0.1065043940782587	0.0177525827905501	6.996219917904302	0.2685737531518202	0.7331620706708146	2.2093166245131526	7259.297028358626	1	0.3649623236528727	1	0	0	0	0	1	0	0	0	1	1	1	1	0	0	0	1	1	0	1	1	2	0	0	3.069706492375044	3529.074194742688	0.2613161195662856	30.371125074550392	13505	0	1
ada566f60ad346b78be2bd70df8641e7	0.03357190181146674	0.1005570652206015	769.2108956364873	0	0.0261902721892091	576.5649572946272	7.756338932848013	0.0743785211658353	0.0444459897267155	0.0494355484247394	0.0194324945474017	7.736906438300611	0.0120689230373573	0.189950000412267	20.250851906117187	769.2108956364873	1	0.0305488382458036	1	0	0	0	0	1	0	0	0	1	1	1	1	0	0	0	1	1	0	1	1	2	0	0	2.501544126484191	7823.027768657066	0.3669509718400049	24.158970561042825	21319	0	1
1c1774ab248b4af8b19ecf6e816d9132	0.07192534338177989	1.3448554048346115	42085.238108281774	0.0008796326166661	0.7018524400452548	7071.915244034492	114.501053658275	0.5569327628155096	0.4591810694903644	0.3078152164792739	0.0198970626001775	114.48115659567485	0.3004757848430196	1.0543391304955596	58.87309330557022	42085.238108281774	0.9998943489918592	0.8014568997968159	1.0001054350349872	0.0052764342883156	0.0012692185827532	0.0003223723466309	0.0002871964157167	0.2649410519554158	9.223841859961632e-05	0.000693181751475	0.0002871826273524	0.9999737065058216	0.999971238221227	0.9999925432808368	0.9999882678112364	-0.0472306	0.0023246287616723	2.6244039138910257e-05	1.0000483186453646	0.99991520480506	0.0007355809527626	0.0544119763374957	0.999957600798712	2.000096637290729	0.000693181751475	0.0001523921905869	3.0341296100709085	9080.694709316149	0.2398556409127591	32.824039447361265	37855.00015848279	0.0004490171334434	1.000713172561346
26e388379a41478abb5ce004f280bc1b	0.011329142193529252	1.2793641852902815	706.262303479263	0	0.313646162746949	28.78336108765738	11.374697218428016	0.4778355162183617	0.624287783014561	0.0575994640939394	0.0065804654770508	11.368116752950966	0.1894664765946634	1.2350726873960722	4.415580077313933	706.262303479263	1	1.2970777625920875	1	0	0	0	0	1	0	0	0	1	1	1	1	0	0	0	1	1	0	1	1	2	0	0	3.5570179872331265	58.3304535637149	0.125983701001544	28.509551287732837	463	0	1
aae94e3da0734e9bbe83b9d6909554ed	0.05594261432886752	1.9958494042007584	12278.733785776822	0	1.0399008127313645	66.9489254863364	24.463700341633377	0.9381515031259968	0.685477618324482	0.6939237543292968	0.0108055195448348	24.452894822088545	0.430491152117032	1.4166809546933228	4.985573517201988	12278.733785776822	1	1.1268566845732173	1	0	0	0	0	1	0	0	0	1	1	1	1	0	0	0	1	1	0	1	1	2	0	0	2.702587088886653	2091.3998038574696	0.3418437077243331	26.132371414913905	6118	0	1
aff2ab91f07f47c8841006eb2db25060	0.050265991152117294	1.0034511333735625	44740.56350723676	0	0.3575047165189112	35.62935269383009	14.490146952591052	0.3727199095837907	0.3509881660704636	0.1524261952257914	0.0145924583474843	14.475554494243568	0.1793720614983397	0.6606345051568597	3.962194553295349	44740.56350723676	1	0.2975178184036997	1	0	0	0	0	1	0	0	0	1	1	1	1	0	0	0	1	1	0	1	1	2	0	0	2.651161394555836	36065.12084321013	0.3518102176622489	29.269279232679285	102513	0	1
b8e8f99f12794f53ab037c67a925c29d	0.10153546470887749	1.5265773351335576	280350.88775315793	0.0031312864120785	0.7382697901454831	23863.398505993595	403.836692588513	0.9450011597291008	0.4482603914546877	0.992540734777322	0.0216346511644367	403.81505793734857	0.3099089163953484	2.385125369920412	138.03473448568946	280350.88775315793	0.9995942192548988	4.795795838348637	1.0011508530994284	1.9872668886061016	0.1187570703581421	0.0079326753893386	0.0064156627820826	0.1153659244574501	0.0007008614908454	0.0027589454689684	0.0064151468091754	0.9998798655846436	0.9998665859641552	0.9999862768140216	0.9999715658323522	-0.0905723	0.0096773816671237	7.881880579773688e-05	1.000385722098908	0.9996441803502142	0.0029649236543794	0.2069645342511232	0.9998220708816234	2.000771444197816	0.0027887641844105	0.0035870845428553	2.5641645370205466	18375.31967695461	0.3728682388132263	22.73726045348161	49261.00271910067	0.0065131028293102	1.0080152594306122
30448265b5d941c583e72f49c46d98c5	0.05982902077878228	0.8953363373372721	27268.44092837144	0	0.1705461742757599	33.861118656363786	13.754101141230109	0.2906695595970689	0.2894010447685188	0.1021879569713803	0.0315454934646202	13.722555647765487	0.1162385834397919	0.5469342769760379	3.9192336071643736	27268.44092837144	1	0.2146483104549473	1	0	0	0	0	1	0	0	0	1	1	1	1	0	0	0	1	1	0	1	1	2	0	0	2.3556449846697984	36015.3263819564	0.395091176563033	25.90933673263622	91157	0	1
332329fab80447918cbf508bd09a9511	0.055614101909841104	1.369344899389202	37631.233631168194	0	1.0106788315429809	4.2061992635849705	7.875832655483519	0.7001307167773924	0.5067240256662914	0.7074536228471834	0.0205865561156813	7.855246099367838	0.4209954295547997	0.909828448307184	0.7334272174978302	37631.233631168194	1	0.3376047847738331	1	0	0	0	0	1	0	0	0	1	1	1	1	0	0	0	1	1	0	1	1	2	0	0	1.9732229153029637	23137.16726792785	0.5089566051018004	19.75646929495605	45460	0	1
bed1c3124e504adca20282ecdeab64cd	0.060592058240277656	1.3912572379923431	72139.98978578665	0.0037817897123972	0.9984586384551208	10579.749893046004	193.92080254596132	0.6724171441446329	0.526009652352815	0.4802529268213682	0.0197541237840204	193.90104842217733	0.4051857151715071	1.6397196780639187	86.7471409484159	72139.98978578665	0.9994783210668422	2.236535806890417	1.000360100136518	0.0397567647324419	0.0061152419796553	0.0011283510513504	0.0010371009399038	0.1512226840858752	0.0003053304261608	0.0026088003151752	0.0010369583593466	0.9998992004853562	0.9998935949536136	0.999989255001426	0.9999717128764424	-0.167877	0.0100813534740801	0.0001420113715192	1.0001686243508572	0.9996223763172152	0.0029267857976758	0.1890856337064521	0.9998111586624616	2.0003372487017144	0.0027372036614767	0.0005413629978135	2.446000529149968	10419.64656553986	0.3883435789027565	28.20859851337576	26817.002832544444	0.0021614063962192	1.0032052476612874
b7391a9c92d5496c91f18cfe5797e72d	0.10796437301793949	1.008979651569464	17449638.78673987	0.025016509542936	0.1587520981413864	26577.20035938241	3672.9999999999977	0.7398970720129096	0.9520880299511594	0.1636109732206933	0.0543632824124636	3672.945636717585	0.1143345365056152	19.92412227142596	149.53886340144885	17449638.78673987	0.9963640052266178	396.4232006095588	1.0573006348641285	26629.936763935548	184.1536335059676	1.4948355406052771	1.3788163579297357	0.0406007145811489	0.0264633459907148	0.0476876643269786	1.3781117069540512	0.9973835260350744	0.9971157618366429	0.999961402597948	0.999856882336503	-0.0803963	0.0617292601454326	0.001576057976525	1.0140490263753852	0.99243616357028	0.0530377069006238	0.3446745585552094	0.9962102871755344	2.0280980527507704	0.0485378620419815	0.718412974633753	2.754773357915853	14012.925063129876	0.3187871115665281	27.974497755506448	43797.17257774643	0.6182238915856326	1.643128511954865
d2316b5a6e31447fb63083226d809cab	0.11189484990762943	0.2558190113141237	3702.345811658465	0	0.0510097548614915	2118.0933726315398	23.573884110793067	0.1884116952556764	0.081161783486042	0.143720101562803	0.0738376960689438	23.500046414724125	0.0243207794779923	0.3234204910076501	31.096293532292755	3702.345811658465	1	0.0691018470945115	1	0	0	0	0	1	0	0	0	1	1	1	1	0	0	0	1	1	0	1	1	2	0	0	2.6416189785189044	11960.71707868343	0.3379210927725224	27.52442527245988	35395	0	1
f6d6b36a3137452e9c47a341a70c3902	0.1181662572797211	1.3419363247317582	756.1293318774647	0	0.478893187647642	8.824870546571637	4.18008624203446	0.5432682968754068	0.4094130627084018	0.3142159269154601	0.0745007328523349	4.105585509182125	0.2322410031258659	0.7928028982514281	2.2465956710556534	756.1293318774647	1	0.3333959930859592	1	0	0	0	0	1	0	0	0	1	1	1	1	0	0	0	1	1	0	1	1	2	0	0	4.371034609867851	68.1554447215295	0.0566545675158183	33.57449269594095	1203	0	1
272ab1012c6b447f8156a7c5435b51c1	0.03607019195519439	1.554240558396862	981.1275644302503	0	0.722746328103036	4.770935515733273	3.779759157531892	0.5333130454213596	0.5047868433122534	0.2196132521482941	0.0153719968724922	3.7643871606594	0.3430946176535653	0.8321043904497087	1.525523888071311	981.1275644302503	1	0.4079749121890761	1	0	0	0	0	1	0	0	0	1	1	1	1	0	0	0	1	1	0	1	1	2	0	0	4.063932362399261	109.03528581510233	0.0769479786980256	23.861130769679004	1417	0	1
2d2335cea1894b5b903255bd226aa242	0.0548113794855096	1.0699404905540315	21208.07585312491	0	0.2534616875705301	31.608454727232527	14.137200471246905	0.3449503431221047	0.3560976593536528	0.1094308079441685	0.0242784371115416	14.112922034135362	0.1657012029197845	0.6450245979221311	3.716474760295544	21208.07585312491	1	0.2970659927045491	1	0	0	0	0	1	0	0	0	1	1	1	1	0	0	0	1	1	0	1	1	2	0	0	2.8903654208255465	14465.75246203947	0.2837868808027518	29.265180248657288	50974	0	1
54aa661e5ce74934bc89fb6282c8650c	0.07174676760941025	1.5199899063018805	51363.80237643144	0	1.003390704005238	6.294682438768312	10.911659046191827	0.8610895486638259	0.4968576955596028	0.9840249877079098	0.0165714257704513	10.895087620421377	0.391765459032154	1.0532546804244738	0.687855112929462	51363.80237643144	1	0.3678702110179889	1	0	0	0	0	1	0	0	0	1	1	1	1	0	0	0	1	1	0	1	1	2	0	0	2.610999344067955	17259.862918727456	0.3727751650877401	25.40517198460088	46301	0	1
9bc9781390894313836ff01fab0e784d	0.00551077911833502	0.0610815816021357	83.7638881806506	0	0.017314654276039	128.95352271714344	6.121040585899431	0.0714396283438951	0.1005838507621617	0.0120266969508921	0.0031207873347993	6.117919798564632	0.0093006591804399	0.4239703209019329	10.703121498676404	83.7638881806506	1	0.1746472125077741	1	0	0	0	0	1	0	0	0	1	1	1	1	0	0	0	1	1	0	1	1	2	0	0	3.2709743842558123	85.22317596566523	0.1828823518576507	21.56282119766436	466	0	1
d51dfbc4192c45a2aa61271834c81fcf	0.06391416930448274	1.5953218206247963	13141.905017599389	0	1.0630193792525373	5.196460217912239	6.557394848436692	0.7463546661182549	0.5640091768118383	0.6365380013460146	0.0218027981868461	6.5355920502498455	0.448796951395283	1.0038228194480383	1.088647547265012	13141.905017599389	1	0.4506149652081167	1	0	0	0	0	1	0	0	0	1	1	1	1	0	0	0	1	1	0	1	1	2	0	0	3.276495702392863	2903.7537187547923	0.222646351691059	32.13659049840298	13042	0	1
7b92db174ffc469eab3ed68594423705	0.062001447882169526	1.5148945201775654	9868.985081754185	0	0.6711900258093447	20.40089356906991	12.87756244809014	0.5745519769473526	0.5174070284314053	0.2674130668140598	0.0201816317069207	12.857380816383218	0.3114929332685155	0.9292490587891352	2.915683784213237	9868.985081754185	1	0.5333938390463827	1	0	0	0	0	1	0	0	0	1	1	1	1	0	0	0	1	1	0	1	1	2	0	0	4.450826843604848	584.5702161168956	0.0511479758611335	37.86463038041183	11429	0	1
ba4b56d6ba3d4cf8b71754d7a36dfd98	0.04780691442660487	0.6900731236157845	3557.761496076246	0	0.1435376957012642	52.1241170709644	9.8979574504602	0.2624491914914488	0.267760156525672	0.0927419806454185	0.0185846844052422	9.879372766054956	0.0899819163584805	0.5494675488537988	5.276650744773036	3557.761496076246	1	0.2330350091288865	1	0	0	0	0	1	0	0	0	1	1	1	1	0	0	0	1	1	0	1	1	2	0	0	3.144038486051514	2481.603699932112	0.2105909453438655	31.448382032963565	11784	0	1
09f590f82d0d4106a8634db9d9279f06	0.0626885280605134	0.5436351237323878	11316.516176816887	0.0006128376748779	0.1151809522146201	7515.2025250803235	72.48267438131681	0.2423408059800129	0.2265281965661238	0.0989463229218095	0.0326609387291046	72.4500134425877	0.0693586354137203	0.6557872052620618	64.92918641921194	11316.516176816887	0.9999239977200414	0.3713277923423834	1.0000661621582123	0.000529181205994	0.0002646051084406	0.0001323170620874	0.0001323243164248	0.3845988436224229	6.61621582124328e-05	0.0005164176154228	0.0001323170620874	0.9999779459472624	0.9999735351367148	0.9999898212064288	0.9999867675683576	-1.43685e-06	2.8096861972801485e-05	8.2702697765541e-06	1.0000330810791065	0.9999338405621642	0.0005494986945288	1.6540992961702856e-05	0.9999669189208936	2.0000661621582125	0.0005164176154228	6.616034462806859e-05	3.039617047173801	5850.329710420308	0.2223276472759865	36.20667690239905	26312.00007600517	0.0001520045599172	1.0003040206734055
8edabc0aa87c4244b11c3d38937380be	0.045976626226557946	1.831530739023491	11175.03014944323	0	1.0578108077220016	11.894123740671937	11.396219625492051	0.6919386338255263	0.6565668705925807	0.2798026113494834	0.0251028417088271	11.371116783783226	0.453946556109546	1.0977772386414288	2.172126910235616	11175.03014944323	1	0.7263357926988652	1	0	0	0	0	1	0	0	0	1	1	1	1	0	0	0	1	1	0	1	1	2	0	0	4.213298209468938	622.3037851827887	0.0671092187191619	34.995286336390286	9273	0	1
edded99f6b584a17aea82cd8007f42f2	0.08000374248811318	0.7774211044604424	17081.974225332036	0.0003420861926402	0.1243979035975589	9551.66515894152	76.79185074024775	0.2714282129620717	0.2435662282871121	0.1150258340094376	0.0662811895953236	76.72556955065242	0.0892353027422699	0.5854720367583605	66.8251190659672	17081.974225332036	0.9999598675629736	0.2691042310341992	1.0000322605855496	0.0008709542085963	0.0002903248692354	9.67794898675758e-05	9.678175664881756e-05	0.5384561616343133	3.226058554960585e-05	0.0001809629585019	9.67794898675758e-05	0.9999919348536126	0.9999903218243352	0.999996128729734	0.9999953913449215	0	9.133252122734276e-06	1.194836501837254e-06	1.0000161302927748	0.9999784933207636	0.0001917164870183	5.376827225052393e-06	0.9999892464714836	2.0000322605855496	0.0001809629585019	4.8390311629098336e-05	2.843631956973907	14606.92330537384	0.2931115966082161	29.785203167810863	49832.00004013324	0.0001805959666173	1.000300999317735
334440b33b6f4fe58d8b597abe6d75e2	0.05278302382720842	1.00912968000772	9096.468115935277	0	0.2440467078635999	25.99273328978239	9.381507795922577	0.3456088959248631	0.3597978246506766	0.1088772079531134	0.0253573916178829	9.356150404304694	0.148484150641111	0.677769267880708	3.81815528499008	9096.468115935277	1	0.3399256715411481	1	0	0	0	0	1	0	0	0	1	1	1	1	0	0	0	1	1	0	1	1	2	0	0	4.241041589816672	1350.989092010908	0.0682248809216699	38.11855688659411	19802	0	1
5e3a6bd8a12c4bc688e7c6f3ef4a6d89	0.02956854150633583	0.2125901405605642	572.0867303847647	0	0.0488508387447497	109.98468667856922	6.287009528531253	0.1273584525635823	0.1294063824253917	0.0469486141329554	0.0177972227962109	6.269212305735042	0.0276346472564843	0.3648360386928285	9.002628652313655	572.0867303847647	1	0.1168851596896848	1	0	0	0	0	1	0	0	0	1	1	1	1	0	0	0	1	1	0	1	1	2	0	0	3.04404440229798	1022.91949744067	0.237998952405926	31.123243011726863	4298	0	1
665c718c58a74de28c20e1b01e7e295e	0.05391428939861354	1.395476687547642	90892.7822015868	0.0016482252443575	0.6870134411857963	8706.320331745726	157.45337806788743	0.4946750118327956	0.5134686292366538	0.1321719224717293	0.0188438618079272	157.4345342060795	0.3179231438354004	1.1428307554412471	65.19893452555714	90892.7822015868	0.9997988443824776	1.0613587682506354	1.00016219615194	0.0172714347061554	0.0028507933853129	0.0005431789002794	0.0004848359627407	0.0329449986309902	0.000142737965151	0.0011591689261511	0.00048480649332	0.9999576322711868	0.9999539835325528	0.9999932439193724	0.9999856765650166	-0.0206755	0.0018049101083063	4.691473582076606e-05	1.000073801255924	0.999858501218913	0.0012299223228943	0.0544245998368579	0.9999292466032558	2.000147602511848	0.0011591689261511	0.000257003715755	2.55474831750816	24507.30465707758	0.3521518637948871	26.600681414845347	69579.00097710977	0.000761524390617	1.001192648685931
0628bd9b53204b41b2b52606ba5a5617	0.10018240196050424	0.8722671006704992	1748.8228162760408	0	0.2648145735233865	47.02840081581508	8.404296735180031	0.373397736466536	0.2854694234912125	0.2027138241212571	0.0557929726376386	8.348503762542393	0.1332457432592853	0.6040448568469522	4.839398801469395	1748.8228162760408	1	0.2254443194849222	1	0	0	0	0	1	0	0	0	1	1	1	1	0	0	0	1	1	0	1	1	2	0	0	4.547573134189365	225.99853953682447	0.047151792100318	44.5271792802016	4793	0	1
aadc53b9af004ac9a101ec756f454462	0.07126229769720267	1.9678082762830376	52177.97487207794	0.0239980688872149	0.8187940000006744	690.9929460650246	178.0373699499688	0.9913794361613336	1.1462403358854438	0.2265467028523298	0.038675208753728	177.99869474121508	0.3925142697425099	5.899874766712755	24.849250790106847	52177.97487207794	0.9960026720059316	33.82568907645032	1.0249634954221618	6.53859215916578	0.9110150677998844	0.1358199756436077	0.1267800230289285	0.0355789231691515	0.0218899873542031	0.0533052810224307	0.1262806920014343	0.996265477622023	0.9958378516355968	0.9987838850343996	0.998376879167758	-0.0338606	0.0156009582797665	0.0016080760520683	1.0112864945735414	0.989973214046904	0.0583338962800812	0.0567916140128206	0.9949713847423486	2.022572989147083	0.0533052810224307	0.065649999668134	4.381344395543582	84.50100066711141	0.0563715814990736	37.073057822404174	1493.0080053368913	0.043965267483192	1.0600400266844563
c55dd57361274fc9b6fe444e1ccd7a49	0.09482582848865427	0.4686769093050008	26329.20831103921	0.0012990224343517	0.1267540257255685	6363.236350053799	71.6520061106789	0.2548264497053649	0.1766929790007285	0.1493037096329954	0.057142008131729	71.59486410254716	0.0633696843993257	0.653812502991168	62.43299878991298	26329.20831103921	0.9998376539047168	0.3625342695981353	1.0002821254655043	0.0015049471051079	0.0007892359377274	0.0004451759834255	0.0004273950576028	0.0208924746267821	0.00027178826577	0.0028585294797007	0.00042732054774	0.9998900403324203	0.9998796665462982	0.9999644423461704	0.9999398332731492	-0.0220412	0.0033353089997675	0.0001356323229162	1.0001388304384056	0.9996092624347156	0.0030826645837484	0.0414246498164109	0.9998046071077982	2.000277660876812	0.0028835972594388	0.0002181427602571	3.237084098625268	13983.012891075285	0.2270227605584284	32.02067430334641	61583.00061695323	0.0001785788069269	1.0004058902797397
ccca020d7d9a4d70b77dddaaae1df55d	0.06741439512869436	30.436568580740868	42195060.94421351	0.9799617435789216	1.947476045494755	66.48159044809883	2966.9999999999995	54.469738153124894	95.60404049132856	0.3241972483721715	0.044974896574446	2966.955025103425	2.223123191879543	285.6837498373145	7.547774308946541	42195060.94421351	0.7925616093441926	78648.25254663928	29.18113127408281	3702566.72019327	35597.12563361845	424.5308688829074	383.4307478684208	0.0558255689888042	5.862447283767308	1.9953858578330967	348.0441826754702	0.7862245424023419	0.7695208059485691	0.9824915397307136	0.96665947115543	-0.223594	0.6574413506838125	0.0574635358591286	4.330241537404512	0.5431592411099916	2.3752017964866705	0.7753901832010449	0.7347670637829637	8.660483074809026	2.055477050433048	201.990404187832	4.655565428309135	31.321083172147	0.0605823659035725	29.74487539704215	409.75435203094776	124.05078398287996	133.56866537717602
291b0fbf208f465f98cf8a7a2a51680d	0.05459023165057729	1.4195493874980183	71.25617593211021	0	0.59863862167634	19.57219299653626	5.826045075812214	0.6321359818747594	0.5753214152740808	0.3081049762947237	0.0254758511926667	5.800569224619547	0.3253286097845659	1.0989685143167185	3.5593582115284086	71.25617593211021	1	0.8081358958787289	1	0	0	0	0	1	0	0	0	1	1	1	1	0	0	0	1	1	0	1	1	2	0	0	3.518237017389506	5.88135593220339	0.0996839988509049	15.51738006320023	59	0	1
57a532c6b1de47d184b8c2fcb4b8fb4c	0.09741043211128203	0.5831820328854928	46375.422189559606	0.0007667114681706	0.1212643976868885	5940.153847670831	83.41326123633635	0.2940036966628521	0.239509430516581	0.1468395451320898	0.0466014703582518	83.3666597659781	0.0700343697183599	0.7304224055277749	56.86103607413994	46375.422189559606	0.9999079690202	0.447078716845559	1.0001924946389698	0.0030982431232313	0.0011608171433152	0.0004565376842603	0.0004399842690884	0.0180606461596941	0.000184199927885	0.0012739893646868	0.0004399496037341	0.9999445653918148	0.9999334784701778	0.999980148318945	0.9999710044028124	-0.0206034	0.001538491208948	1.672821388817331e-05	1.0000941736417135	0.9998375965106528	0.0013724292957946	0.0384985082545345	0.9999187939327248	2.0001883472834274	0.0012922600674058	0.0002241304883371	2.636637378193037	29636.696930652062	0.3409495298266539	25.28549505583285	86916.00029911187	0.0002415796345254	1.000448667801758
bb48d85a6504429cb61db95f04232dc4	0.021478768146650663	5.029373962823172	1866.253362559027	0	2.756176858185712	9.902791410354569	15.486205186110324	1.84241505784886	1.815548071622194	0.7945925242113222	0.0044164555412403	15.481788730569082	1.2187015560401708	3.062377769119794	2.234570858942122	1866.253362559027	1	5.983664355410913	1	0	0	0	0	1	0	0	0	1	1	1	1	0	0	0	1	1	0	1	1	2	0	0	4.238514846991772	12.21608040201005	0.061387338703568	33.855256180399486	199	0	1
689328f9a72d4434957df49aed9d2da6	0.07266899189922563	1.2827842055866274	38026.01771363501	0.0023960225104083	0.5189342711576886	6147.327740181915	133.10224810433783	0.4614113579384258	0.4619018411781851	0.1434316289302972	0.0344261394409226	133.06782196489692	0.2694177563317772	1.3905718954705892	67.07812381874848	38026.01771363501	0.9996949204282332	1.7207897552380855	1.0005588120567723	0.036031393601082	0.0079179271693486	0.0018995145342785	0.0018031840860461	0.0212887127611821	0.0005249890958138	0.0030606597164991	0.0018028884292657	0.9998647652445632	0.9998474375622858	0.9999651989143729	0.9999430466417402	-0.0348422	0.0034306754295853	9.252842548065127e-05	1.0002673263994726	0.999593721894682	0.0032638237498188	0.0544875240513744	0.9997968359666792	2.0005346527989447	0.0030606597164991	0.0009256746550811	3.1240550402750946	4732.180676328502	0.2406397496226037	30.85718964793524	19659.000610221206	0.0017796023903821	1.002695143656242
70a033ad1f704213886ac33056f5c47a	0.040463441437449184	1.6493632369539373	1510.2108282876306	0	0.4190504728780185	31.076619547688274	12.420161883231367	0.6076584524204305	0.7014426739010318	0.1563574873874984	0.0189701196245028	12.401191763606864	0.2479366472090373	1.4305090478186773	4.685247864113705	1510.2108282876306	1	1.677107341093106	1	0	0	0	0	1	0	0	0	1	1	1	1	0	0	0	1	1	0	1	1	2	0	0	3.834214832435349	67.13550135501355	0.0909695140311836	16.906838228273884	738	0	1
e89a41607ffe4186ae2ccd63b792bd7f	0.07023967753486912	1.6923801925484432	209744.5762155149	0.0051863847642625	1.0272667733935856	9777.620489747062	401.6695572869701	0.9767238100349562	0.5760742187321612	0.970825976007002	0.0282187168219449	401.6413385701482	0.3906057729816655	3.827937719303173	93.46667438755188	209744.5762155149	0.999301539442054	13.699117781774786	1.0049206690565031	11.828156657633407	0.7319414669598865	0.048214214686889	0.0447459847083021	0.0386937834794588	0.0039043960488496	0.0106390098927003	0.0447306076557779	0.9994669129575288	0.99941844793534	0.9999105536840984	0.9998551178131092	-0.0720526	0.0163443047942373	0.0003548320177486	1.0020247523301673	0.9984543331297407	0.0114310810534483	0.142863080995698	0.9992268240052712	2.0040495046603346	0.0106579050587207	0.0232400498487977	2.742939733903504	4901.456476177169	0.3424239539036726	28.4932625799966	14304.002235573564	0.0200472499967738	1.023543384099483
0c7707b0022d49829ead9ff354360729	0.06875971522290145	2.1213251271622844	8356114.272584611	0.036591699565612	1.0298071461105551	15689.552158244693	2425.0000000000005	1.5437118436953725	1.2570833583516636	1.0260441754599614	0.0157789162504901	2424.98422108375	0.4177971501207044	16.61208902385886	114.1595202422351	8356114.272584611	0.9939358414376432	273.5784554802466	1.0592522187934863	7668.518416905121	80.72352174173196	1.0076940591025858	0.8835217246399524	0.0667816386391304	0.0254359361893817	0.0655108680850267	0.88286921138191	0.996330257655116	0.9960283337217184	0.9999426436711742	0.9997943334407684	-0.107856	0.0859812316419416	0.0036341557895236	1.0140063875457108	0.9879791727926284	0.0749221807865725	0.4043971760435403	0.9939684172430264	2.0280127750914216	0.0678487609867918	0.4728039459356345	2.340909120329183	13169.437978863936	0.4349219940179635	22.731430488492254	30096.37727873184	0.4259290043259826	1.451453104359313
282e1636779643baabe9d7cc2375bb7b	0.04601128812339839	0.2256036170057212	1649.4066897033715	0	0.0499093602176752	144.4043530421292	11.688382789675044	0.1686798284025764	0.1633041765357381	0.0719241392537359	0.023504504007497	11.664878285667548	0.0267102554408071	0.4941779320266414	9.883677702406372	1649.4066897033715	1	0.2157589439922052	1	0	0	0	0	1	0	0	0	1	1	1	1	0	0	0	1	1	0	1	1	2	0	0	2.590050508750751	1945.5990524133847	0.2880661907630122	28.242055662471024	6754	0	1
bcc4bcd2849b4a61b313abe6ea074bd2	0.04513254744213524	1.5885067640579875	389160.4035234872	0.0082654436468394	0.5468874894363766	11130.204878752776	454.4876926996572	0.6131589981454209	0.7083400037695435	0.1299253927877937	0.0171540575989042	454.4705386420582	0.3007993333101876	3.345844078551385	89.77665181665766	389160.4035234872	0.9988497849293124	10.81870864097067	1.0040793944200788	7.267374901594969	0.4427135514777732	0.0318476885815811	0.030485039993117	0.0226165343416738	0.0035857366716287	0.014784133353624	0.0304721144482421	0.9992945422334036	0.9992237968908037	0.999945070363328	0.999861853105248	-0.0579677	0.0235628128394337	0.0005828207084793	1.0018676187500437	0.9977940444060353	0.0162085372949837	0.1895710796592053	0.998896330752577	2.0037352375000874	0.0150137245217259	0.0155831821436745	2.651018526350405	12006.675402007882	0.3453866295201185	26.993499906574545	34723.015073497685	0.0139198700232707	1.0173747950407042
1f4e758399c848fd96e0f8b82d9214a8	0.17027125022388517	1.4646774317355389	62873.60690628158	0	0.458750841172499	73.46692553394175	18.99964520558333	0.990955002954275	0.3630229954513871	1.0544347759732382	0.0662811895953236	18.93336401598801	0.2299439980456291	1.1281486229773223	3.244617683490618	62873.60690628158	1	0.2907274976455218	1	0	0	0	0	1	0	0	0	1	1	1	1	0	0	0	1	1	0	1	1	2	0	0	2.611996362650298	18080.39118641323	0.3659924128340161	22.78694928478737	49401	0	1
807672453df349a9a343eaadd8245dc4	0.10053926808126297	0.3706469774498654	12801.622731555934	0.0001795915266138	0.0776775088650063	905.3196229210994	27.595977147525147	0.2149732471421188	0.1327173924179586	0.1348423418933177	0.0627980386257456	27.5331791088994	0.0420571011102662	0.3567888242369611	14.354860523614192	12801.622731555934	0.9999801123651388	0.0810847681135666	1.0000032404575172	3.2403209899729477e-06	3.240355120902271e-06	3.2404233849183807e-06	3.2404575172860173e-06	0.6923060720704005	3.2404575172860173e-06	5.825533097933388e-05	3.2404233849183807e-06	0.9999983797712412	0.9999983797712412	0.9999993519084964	0.9999989198474944	0	2.7521877231369294e-06	3.2404575172860173e-06	1.0000016202287587	0.999993519136164	6.149578849652134e-05	1.6202372916953755e-06	0.9999967595424828	2.000003240457517	5.825533097933388e-05	1.6202202255510995e-06	2.7687035007698317	30207.36685096058	0.3003795279718446	31.767867922660912	100562.00001988784	9.9438174305287e-06	1.000029831748936
97c0f40e15b447aaa95f44d8b83c9f8c	0.07832536275899427	0.8529839070513362	18553.06094332448	0.0003437788747197	0.1515300608141517	7385.819919424521	74.58547984201847	0.2918639169550082	0.2679177106000096	0.1181150535702416	0.0662811895953236	74.51919865242314	0.1049961799869206	0.6118089829983292	55.45445544443049	18553.06094332448	0.9999596505739872	0.2891256856571298	1.0000257910611037	0.0002063086139694	0.0001031567911916	5.158087998317029e-05	5.158212220693406e-05	0.4615320136955458	2.579106110346703e-05	0.0002164947460547	5.158087998317029e-05	0.999991402979632	0.9999896835755588	0.9999960321444455	0.9999948417877794	0	1.0952509949591209e-05	3.223882637933379e-06	1.0000128955305518	0.9999742094047304	0.0002293902766062	6.4478429156609765e-06	0.9999871044694484	2.000025791061104	0.0002164947460547	2.579075054752608e-05	3.173935433632589	12016.75511439293	0.2424394769477652	33.57374338841909	49564.00004035024	8.069885202598218e-05	1.0001614009603357
b4aeb5e23b48412f81553fd20306bc67	0.04685481121994232	2.5694505067999684	1506.6348203452571	0	1.4188204687084414	10.673567777654526	9.46401688128152	1.025593618748515	0.9082928130052692	0.5828329877065095	0.0236417547572759	9.440375126524245	0.6161923129069692	1.6117215150188264	2.265123490254092	1506.6348203452571	1	1.545803971156907	1	0	0	0	0	1	0	0	0	1	1	1	1	0	0	0	1	1	0	1	1	2	0	0	4.482422296709391	28.186206896551724	0.0485969084423305	42.52674197384066	580	0	1
8103875a64274fc0881efb251c2188cd	0.06469214427191317	0.8963661114132253	18641.55749537253	0.0003675028750615	0.2479368165809689	169.60074364800354	27.19107478645583	0.3406624029861148	0.3194152624812156	0.1370984850139226	0.0217908510043585	27.16928393545147	0.1382451110776915	0.6360406344736638	6.64953041370292	18641.55749537253	0.9999565981641227	0.2884968158933867	1.0000071614899744	7.160823121341293e-06	7.16098982493371e-06	7.161323255410394e-06	7.161489974530802e-06	0.6923041115210248	7.161489974530802e-06	0.0001205521479086	7.161323255410394e-06	0.9999964192550128	0.9999964192550128	0.999998567702005	0.9999976128366752	0	6.082439357274308e-06	7.161489974530802e-06	1.0000035807449872	0.9999856772701295	0.000127713637883	3.5807866674592245e-06	0.9999928385100256	2.0000071614899744	0.0001205521479086	3.5807033074852987e-06	2.998516796636109	11052.524739583334	0.2398551375777633	33.077956541084944	46078.000043402775	2.1700917938609183e-05	1.0000651041666666
dc4bce127b4942b08873443a3e0adca9	0.07997670409867869	1.3147873749556056	30014.349300437232	0.0038767932796643	0.5746471698127253	2601.502424387409	86.80277627347611	0.5061795111565092	0.4654798616345347	0.2022477658944319	0.0272810630058861	86.77549521047023	0.2714991888249713	1.2581209526204942	42.02043930182562	30014.349300437232	0.9994727295925488	1.3266506339080577	1.0003620227307943	0.0061302351336145	0.002277490881707	0.0008825674773534	0.0008827462984578	0.1537703995679783	0.0003620227307944	0.0023320463328154	0.0008825674773534	0.9998910027185796	0.999871060991369	0.9999610171116342	0.9999432645429764	-7.48119e-06	0.000136539859081	4.591406137009767e-05	1.0001810113653973	0.9996785420730068	0.0024927999889791	8.038657928209076e-05	0.9998392463438358	2.0003620227307946	0.0023320463328154	0.0004413284439528	3.805128642141126	2277.931125408712	0.1201313746128421	41.37567504790695	18952.00189853391	0.0011599370474999	1.002214956228246
ebd851349ac64c2ba3356da949947b16	0.6948997437120968	1.49117655463023	145830.9078712339	0.000443493998748	0.3280372121528148	16453.379971889906	128.02903188361267	1.103784517590534	0.2787958551990084	1.091525203412847	0.028191874382778	128.0008400092299	0.1433275920664906	1.350531418027472	103.76627641895888	145830.9078712339	0.9999499721720384	0.6055948498067264	1.000070790107452	0.0070775019647965	0.0015084112353256	0.0003249161128121	0.0003249227186767	0.1538383992332601	7.079010745214575e-05	0.0002749698732485	0.0003249161128121	0.999987234054805	0.9999851387156412	0.9999943439524464	0.9999933006464264	0	1.3257447796061328e-05	0	1.0000353950537262	0.9999687816023508	0.0002905792856678	7.80478658624007e-06	0.9999843905875804	2.0000707901074524	0.0002749698732485	0.0001624597078722	1.907611336100386	42994.405608224726	0.5377392701831645	17.337813248546322	79950.00007504315	0.0005127821862255	1.0007379243064762
[truncated: 155 more rows]
[truncated: 1,826 more columns]
