# Supplementary material for: Machine learning and radiomics for predicting therapeutic efficacy in newly diagnosed sputum-negative pulmonary tuberculosis: a retrospective study
Source: PeerJ journal article supplement (doi:10.7717/peerj.20557), 2026-01-16
Supplement: Supplementary_material_6.xlsx [file Supplementary_material_6.xlsx]

## Sheet: Sheet1
Group	Sex	Age	ESR (mm/1h)	CRP (mg/L)	Serum globulin (g/L)	Sputum smear	Sputum culture	T-SPOT	Smoking	Alcohol consumption	Occupation	Treatment regimen	H	R/Rft	Z	E	Time from symptom onset to CT scan
Improvement	Male	24	2	0.29	26.5	-	-	+	0	0	Others	HRZE	0.3qd	0.45qd	0.5tid	0.75qd	3
Improvement	Male	64	26	6.6	30.6	-	-	+	0	0	Worker	HRZE	0.4qd	0.6qd	0.5tid	0.75qd	37.97
Improvement	Female	29	9	3.13	37.4	-	-	+	0	0	Student	HRZE	0.3qd	0.45qd	0.5tid	0.75qd	1
Improvement	Female	29	5	1.45	29.5	-	-	+	0	0	Employee	HRZE	0.3qd	0.45qd	0.5tid	0.75qd	37.97
Improvement	Female	35	25.11	1.79	34.4	-	-	+	0	0	Employee	HRZE	0.3qd	0.45qd	0.5tid	0.75qd	No symptoms
Improvement	Male	22	46	54.3	32.7	-	-	+	0	0	Farmer	HRZE	0.3qd	0.45qd	0.5tid	0.75qd	37.97
Improvement	Male	38	25.11	0.37	28.7	-	-	+	0	0	Worker	HRZE	0.3qd	0.6qd	0.5tid	0.75qd	210
Improvement	Female	40	19	3.47	28.7	-	-	+	0	0	Unemployed individual	HRZE	0.3qd	0.45qd	0.5tid	0.75qd	14
Improvement	Female	25	32	1.1	37.8	-	-	+	0	0	Unemployed individual	HRZE	0.3qd	0.45qd	0.5tid	0.75qd	37.97
Improvement	Male	58	25.11	26.34	31.16	-	-	+	1	1	Others	HRZE	0.3qd	0.45qd	0.5tid	0.75qd	60
Improvement	Female	41	25.11	3.3	30.7	-	-	+	0	0	Unemployed individual	HRZE	0.3qd	0.45qd	0.5tid	0.75qd	37.97
Improvement	Female	29	25.11	0.41	35.7	-	-	+	0	0	Worker	HRZE	0.3qd	0.45qd	0.5tid	0.75qd	5
Improvement	Female	32	25.11	0.6	32.8	-	-	+	0	0	Employee	HRZE	0.3qd	0.45qd	0.5tid	0.75qd	37.97
Improvement	Male	29	25.11	0.94	30.9	-	-	+	0	0	Employee	HRZE	0.3qd	0.45qd	0.5tid	0.75qd	37.97
Improvement	Male	21	25.11	25.58	36.1	-	-	+	0	0	Student	HRZE	0.3qd	0.45qd	0.5tid	0.75qd	37.97
Improvement	Male	27	25.11	16.3	31.7	-	-	+	0	0	Employee	HRZE	0.3qd	0.6qd	0.5tid	0.75qd	37.97
Improvement	Female	35	17	18.26	29.2	-	-	+	0	0	Worker	HRZE	0.3qd	0.45qd	0.5tid	0.75qd	37.97
Improvement	Female	29	6	0.23	31.2	-	-	+	0	0	Employee	HRZE	0.3qd	0.6qd	0.5tid	0.75qd	7
Improvement	Male	18	59	16.33	33.2	-	-	+	0	0	Student	HRZE	0.4qd	0.6qd	0.5tid	0.75qd	37.97
Improvement	Female	37	25.11	0.64	26.2	-	-	+	0	0	Worker	HRZE	0.3qd	0.6qd	0.5tid	0.75qd	30
Improvement	Female	27	25.11	20.29	30.8	-	-	+	0	0	Employee	HRZE	0.3qd	0.45qd	0.5tid	0.75qd	37.97
Improvement	Male	53	25.11	1.47	31.3	-	-	+	1	1	Unemployed individual	HRZE	0.3qd	0.45qd	0.5tid	0.75qd	37.97
Improvement	Male	30	25.11	4.02	30.5	-	-	+	1	1	Unemployed individual	HRZE	0.3qd	0.6qd	0.5tid	0.75qd	37.97
Improvement	Male	29	13	15.32	37.8	-	-	+	1	1	Others	HRZE	0.3qd	0.6qd	0.5tid	0.75qd	7
Improvement	Male	35	25.11	4.52	30	-	-	+	1	1	Worker	HRZE	0.3qd	0.6qd	0.5tid	0.75qd	14
Improvement	Female	20	18	0.87	38.6	-	-	+	0	0	Student	HRZE	0.3qd	0.45qd	0.5tid	0.75qd	150
Improvement	Female	33	25.11	2.04	31.1	-	-	+	0	0	Worker	HRZE	0.3qd	0.45qd	0.5tid	0.75qd	37.97
Improvement	Male	15	25.11	20.66	31.1	-	-	+	1	0	Student	HRZE	0.3qd	0.45qd	0.5tid	0.75qd	37.97
Improvement	Male	56	25.11	4.82	32	-	-	+	1	1	Worker	HRZE	0.3qd	0.45qd	0.5tid	0.75qd	20
Improvement	Male	36	25.11	2.75	23.6	-	-	+	1	1	Farmer	HRZE	0.3qd	0.45qd	0.5tid	0.75qd	37.97
Improvement	Male	39	21	23.26	35.9	-	-	+	0	0	Unemployed individual	HRZE	0.3qd	0.6qd	0.5tid	0.75qd	30
Improvement	Male	36	44	44.5	35.2	-	-	+	1	1	Others	HRZE	0.3qd	0.45qd	0.5tid	0.75qd	37.97
Improvement	Male	26	25.11	17.33	27.3	-	-	+	0	0	Worker	HRZE	0.3qd	0.45qd	0.5tid	0.75qd	37.97
Improvement	Female	30	25.11	0.7	36.5	-	-	+	0	0	Worker	HRZE	0.3qd	0.45qd	0.5tid	0.75qd	37.97
Improvement	Female	36	26	2.44	35.6	-	-	+	0	0	Employee	HRZE	0.4qd	0.6qd	0.5tid	0.75qd	37.97
Improvement	Female	26	26	11.54	32.1	-	-	+	0	0	Others	HRZE	0.3qd	0.45qd	0.5tid	0.75qd	37.97
Improvement	Male	65	25.11	35.3	34.8	-	-	+	1	1	Others	HRftZE	0.5qd	0.6biw	0.5tid	0.75qd	37.97
Improvement	Male	28	25.11	0.8	28.5	-	-	+	1	1	Worker	HRZE	0.3qd	0.45qd	0.5tid	0.75qd	37.97
Improvement	Female	28	18	3.48	23.4	-	-	+	0	0	Worker	Ethambutol Hydrochloride，Pyrazinamide，Rifampicin and Isoniazid Tablets Ⅱ	3.6qd				37.97
Improvement	Female	31	25.11	0.29	34.2	-	-	+	0	0	Worker	HRZE	0.3qd	0.45qd	0.5tid	0.75qd	37.97
Improvement	Female	50	31	33.24	33.6	-	-	+	0	0	Farmer	HRftE	0.3qd	0.6biw		0.75qd	37.97
Improvement	Male	27	25.11	58.62	30.5	-	-	+	1	1	Employee	HRZE	0.3qd	0.45qd	0.5tid	0.75qd	37.97
Improvement	Male	33	36	16	30.7	-	-	+	0	0	Others	HRZE	0.3qd	0.45qd	0.5tid	0.75qd	37.97
Improvement	Female	54	25.11	1.16	31	-	-	+	0	0	Employee	HRZE	0.4qd	0.6qd	0.5tid	0.75qd	37.97
Improvement	Female	29	25.11	0.33	33.6	-	-	+	0	0	Employee	HRZE	0.3qd	0.45qd	0.5tid	0.75qd	37.97
Improvement	Female	43	25.11	0.41	23.6	-	-	+	0	0	Worker	HRZE	0.3qd	0.6qd	0.5tid	0.75qd	30
Improvement	Male	31	25.11	0.21	32.7	-	-	+	1	1	Worker	HRZE	0.3qd	0.45qd	0.5tid	0.75qd	37.97
Improvement	Female	36	4	0.44	27	-	-	+	0	0	Worker	HRftZE	0.3qd	0.6biw	0.5tid	0.75qd	150
Improvement	Female	26	34	11.13	30.7	-	-	+	0	0	Worker	HRZE	0.3qd	0.45qd	0.5tid	0.75qd	37.97
Improvement	Male	37	25.11	26.34	31.16	-	-	+	1	1	Worker	HRZE	0.3qd	0.45qd	0.5tid	0.75qd	37.97
Improvement	Female	27	25.11	0.58	28.1	-	-	+	0	0	Worker	HRZE	0.3qd	0.45qd	0.5tid	0.75qd	150
Improvement	Female	27	25.11	2.43	28.7	-	-	+	0	0	Worker	HRZE	0.3qd	0.45qd	0.5tid	0.75qd	2
Improvement	Male	26	3	2.61	29.9	-	-	+	0	1	Unemployed individual	HRZE	0.3qd	0.45qd	0.5tid	0.75qd	3
Improvement	Female	34	25.11	3.24	39.4	-	-	+	0	0	Employee	HRZE	0.3qd	0.45qd	0.5tid	0.75qd	30
Improvement	Male	27	25.11	0.22	25.9	-	-	+	1	1	Employee	HRftZE	0.3qd	0.45biw	0.5tid	0.75qd	21
Improvement	Female	41	16	4.03	27.6	-	-	+	0	0	Worker	HRZE	0.3qd	0.45qd	0.5tid	0.75qd	37.97
Improvement	Male	23	3	9.82	30.5	-	-	+	0	0	Student	HRZ	0.3qd	0.45qd	0.5tid		14
Improvement	Female	27	6	0.69	29	-	-	+	0	0	Employee	HRZE	0.3qd	0.45qd	0.5tid	0.75qd	60
Improvement	Female	31	25.11	4.24	26.5	-	-	+	0	0	Worker	HRftZE	0.3qd	0.45biw	0.5tid	0.75qd	37.97
Improvement	Male	42	25.11	0.33	33.7	-	-	+	1	1	Farmer	HRZE	0.3qd	0.45qd	0.5tid	0.75qd	7
Improvement	Female	32	25.11	26.34	31.16	-	-	+	0	0	Employee	HRftZE	0.3qd	0.45biw	0.5tid	0.75qd	7
Improvement	Male	20	3	1.32	29.1	-	-	+	0	0	Student	HRZE	0.4qd	0.6qd	0.5tid	0.75qd	37.97
Improvement	Male	31	25.11	3.47	31	-	-	+	1	1	Worker	HRZE	0.3qd	0.45qd	0.5tid	0.75qd	30
Improvement	Female	34	25.11	0.44	32.4	-	-	+	0	0	Worker	HRZE	0.3qd	0.45qd	0.5tid	0.75qd	No symptoms
Improvement	Male	24	25.11	0.76	27.4	-	-	+	0	0	Student	HRZE	0.3qd	0.6qd	0.5tid	0.75qd	No symptoms
Improvement	Female	31	25.11	1.25	37.2	-	-	+	0	0	Worker	HRZE	0.3qd	0.45qd	0.5tid	0.75qd	3
Improvement	Female	27	25.11	11	33.3	-	-	+	0	0	Employee	Ethambutol Hydrochloride，Pyrazinamide，Rifampicin and Isoniazid Tablets Ⅱ	3.6qd				No symptoms
Improvement	Female	28	25.11	4.63	36.9	-	-	+	0	0	Worker	HRZE	0.3qd	0.6qd	0.5tid	0.75qd	7
Improvement	Male	26	25.11	26.34	31.16	-	-	+	1	1	Employee	HRZE	0.3qd	0.6qd	0.5tid	0.75qd	37.97
Improvement	Male	16	20	20.75	32.6	-	-	+	0	0	Farmer	HRZE	0.3qd	0.45qd	0.5tid	0.75qd	37.97
Improvement	Male	18	25.11	0.8	25	-	-	+	0	0	Farmer	HRZE	0.3qd	0.45qd	0.5tid	0.75qd	37.97
Improvement	Male	38	6	10.36	27.5	-	-	+	1	1	Worker	HRZE	0.3qd	0.45qd	0.5tid	0.75qd	37.97
Improvement	Male	43	25.11	0.42	21.8	-	-	+	1	1	Employee	Ethambutol Hydrochloride，Pyrazinamide，Rifampicin and Isoniazid Tablets Ⅱ	4.5qd				7
Improvement	Male	28	25.11	8.79	34.4	-	-	+	1	1	Worker	HRZE	0.3qd	0.6qd	0.5tid	0.75qd	30
Improvement	Male	23	43	2.75	24.5	-	-	+	0	0	Unemployed individual	HRZE	0.3qd	0.6qd	0.5tid	0.75qd	60
Improvement	Male	58	10	0.86	31.4	-	-	+	1	1	Employee	HRZE	0.3qd	0.6qd	0.5tid	0.75qd	10
Improvement	Male	64	83	40.98	34.7	-	-	+	1	1	Others	HRZE	0.3qd	0.45qd	0.5tid	0.75qd	37.97
Improvement	Female	32	13	4.28	27.8	-	-	+	0	0	Others	HRZE	0.3qd	0.6qd	0.5tid	0.75qd	14
Improvement	Male	41	82	64.68	36.8	-	-	+	0	0	Employee	HRZE	0.3qd	0.45qd	0.5tid	0.75qd	37.97
Improvement	Female	27	25.11	0.4	25.5	-	-	+	0	0	Worker	HRZE	0.3qd	0.6qd	0.5tid	0.75qd	37.97
Improvement	Male	14	25.11	0.13	36.3	-	-	+	0	0	Student	HRZE	0.3qd	0.45qd	0.5bid	0.5qd	No symptoms
Improvement	Male	31	65	28.42	31.5	-	-	+	1	1	Employee	HRZE	0.3qd	0.6qd	0.5tid	0.75qd	7
Improvement	Male	44	25.11	11.27	29.5	-	-	+	1	1	Worker	HRZE	0.3qd	0.45qd	0.5bid	0.5qd	37.97
Improvement	Male	25	25.11	7.5	38.3	-	-	+	0	0	Student	HRZE	0.3qd	0.45qd	0.5tid	0.75qd	37.97
Improvement	Female	56	25.11	3.51	26.2	-	-	+	0	0	Unemployed individual业	HRZE	0.3qd	0.6qd	0.5tid	0.75qd	No symptoms
Improvement	Male	49	25.11	7.32	33	-	-	+	0	1	Farmer	HRZE	0.3qd	0.45qd	0.5bid	0.5qd	No symptoms
Improvement	Male	27	25.11	5.09	29.3	-	-	+	0	0	Worker	HRZE	0.3qd	0.45qd	0.5bid	0.5qd	No symptoms
Improvement	Female	26	25.11	0.96	32.6	-	-	+	0	0	Worker	HRZE	0.3qd	0.45qd	0.5tid	0.75qd	37.97
Improvement	Male	36	25.11	7.84	30.9	-	-	+	1	1	Worker	HRZE	0.3qd	0.45qd	0.5bid	0.5qd	37.97
Improvement	Male	43	25.11	1.02	25.9	-	-	+	1	1	Worker	HRZE	0.3qd	0.45qd	0.5tid	0.75qd	37.97
Improvement	Female	31	25.11	9.38	29.6	-	-	+	0	0	Worker	HRZE	0.3qd	0.45qd	0.5tid	0.75qd	37.97
Improvement	Female	26	21	9.96	31.4	-	-	+	0	0	Others	HRZE	0.3qd	0.45qd	0.5tid	0.75qd	37.97
Improvement	Female	32	25.11	1.79	25.8	-	-	+	0	0	Employee	HRZE	0.3qd	0.45qd	0.5tid	0.75qd	37.97
Improvement	Male	37	25.11	111.61	35	-	-	+	1	1	Employee	HRZE	0.3qd	0.45qd	0.5tid	0.75qd	37.97
Improvement	Male	31	4	1.13	29.6	-	-	+	1	1	Employee	HRZE	0.3qd	0.45qd	0.5tid	0.75qd	37.97
Improvement	Female	30	25.11	5.66	31	-	-	+	0	0	Others	HRZE	0.3qd	0.45qd	0.5bid	0.5qd	7
Improvement	Female	26	25.11	0.2	23.6	-	-	+	0	0	Others	Ethambutol Hydrochloride，Pyrazinamide，Rifampicin and Isoniazid Tablets Ⅱ	2.7qd				7
Improvement	Female	50	25.11	1.5	27.7	-	-	+	0	0	Farmer	HRZE	0.3qd	0.45qd	0.5bid	0.5qd	7
Improvement	Female	25	33	176.06	29.7	-	-	+	0	0	Student	HRZE	0.3qd	0.45qd	0.5bid	0.5qd	No symptoms
Improvement	Male	38	25.11	17.16	39.8	-	-	+	1	0	Others	HRZE	0.3qd	0.45qd	0.5tid	0.75qd	37.97
Improvement	Male	29	25.11	9.85	33.8	-	-	+	1	1	Employee	HRZE	0.3qd	0.45qd	0.5tid	0.75qd	37.97
Improvement	Male	55	77	8.87	39.6	-	-	+	0	0	Farmer	HRZE	0.3qd	0.45qd	0.5bid	0.5qd	No symptoms
Improvement	Female	50	25.11	3.77	34.3	-	-	+	0	0	Unemployed individual	HRZE	0.3qd	0.45qd	0.5tid	0.75qd	37.97
Improvement	Male	32	25.11	1.26	29.9	-	-	+	0	0	Employee	HRE	0.3qd	0.45qd		0.5qd	No symptoms
Improvement	Male	22	19	19.18	36.3	-	-	+	0	0	Employee	HRZE	0.3qd	0.45qd	0.5tid	0.75qd	37.97
Improvement	Male	39	25.11	66.16	37.3	-	-	+	0	0	Employee	HRZE	0.3qd	0.45qd	0.5tid	0.75qd	37.97
Improvement	Male	30	25.11	2.34	34.1	-	-	+	1	1	Employee	HRZE	0.3qd	0.45qd	0.5tid	0.75qd	37.97
Improvement	Male	62	25.11	9.21	33.9	-	-	+	1	1	Others	HRZE	0.3qd	0.6qd	0.5tid	0.75qd	17
Improvement	Male	31	2	2.16	30.6	-	-	+	1	0	Employee	HRZE	0.3qd	0.6qd	0.5tid	0.75qd	37.97
Improvement	Male	28	6	0.26	26.8	-	-	+	0	0	Student	HRZE	0.3qd	0.45qd	0.5tid	0.75qd	37.97
Improvement	Female	36	25.11	34.1	54.07	-	-	+	0	0	Unemployed individual	HRZE	0.3qd	0.45qd	0.5bid	0.5qd	37.97
Improvement	Male	19	30	52.3	38.8	-	-	+	0	0	Student	HRftE	0.3qd	0.45biw		0.75qd	60
Improvement	Male	37	31	22.07	39.8	-	-	+	1	1	Employee	HRZE	0.3qd	0.6qd	0.5tid	0.75qd	60
Improvement	Male	39	25.11	39.68	38.1	-	-	+	1	1	Employee	HRZE	0.3qd	0.45qd	0.5bid	0.5qd	37.97
Improvement	Male	35	48	39.74	27.7	-	-	+	0	0	Employee	HRftE	0.3qd	0.45biw		0.75qd	11
Improvement	Female	18	25.11	2.02	32.3	-	-	+	0	0	Student	Ethambutol Hydrochloride，Pyrazinamide，Rifampicin and Isoniazid Tablets Ⅱ	3.6qd				No symptoms
Improvement	Male	15	25.11	0.73	30.3	-	-	+	0	0	Student	HRZE	0.3qd	0.45qd	0.5tid	0.75qd	37.97
Improvement	Male	29	25.11	6.84	28.5	-	-	+	1	0	Employee	HRZE	0.4qd	0.6qd	0.5tid	1.0qd	No symptoms
Improvement	Female	25	25.11	4.48	35.9	-	-	+	0	0	Employee	Ethambutol Hydrochloride，Pyrazinamide，Rifampicin and Isoniazid Tablets Ⅱ	3.6qd				No symptoms
Improvement	Male	20	25.11	17.94	30	-	-	+	0	0	Student	HRZE	0.3qd	0.45qd	0.5tid	0.75qd	120
Improvement	Male	26	25.11	5.17	23.8	-	-	+	1	1	Employee	HRZE	0.3qd	0.45qd	0.5tid	0.75qd	No symptoms
Improvement	Female	31	25.11	0.2	28.6	-	-	+	0	0	Employee	HRZE	0.3qd	0.45qd	0.5tid	0.75qd	7
Improvement	Female	27	4	0.77	23.3	-	-	+	0	0	Employee	HRZE	0.3qd	0.45qd	0.5tid	0.75qd	No symptoms
Improvement	Male	29	12	12.08	28.4	-	-	+	1	0	Employee	HRZE	0.3qd	0.45qd	0.5tid	0.75qd	60
Improvement	Male	29	25.11	18.65	29.6	-	-	+	1	1	Employee	HRZE	0.3qd	0.45qd	0.5tid	0.75qd	37.97
Improvement	Male	35	25.11	0.31	23.4	-	-	+	1	1	Employee	Ethambutol Hydrochloride，Pyrazinamide，Rifampicin and Isoniazid Tablets Ⅱ	4.5qd				30
Improvement	Male	43	84	63.75	39.9	-	-	+	0	0	Employee	HRZE	0.3qd	0.45qd	0.5tid	0.75qd	37.97
Improvement	Female	38	25.11	22.8	32.4	-	-	+	0	0	Employee	HRZE	0.3qd	0.45qd	0.5tid	0.75qd	0
Improvement	Male	28	25.11	7.5	30.3	-	-	+	1	1	Employee	HRZE	0.4qd	0.6qd	0.5tid	1.0qd	360
Improvement	Male	41	28	3.61	30.1	-	-	+	0	0	Farmer	HRZE	0.3qd	0.45qd	0.5tid	0.75qd	37.97
Improvement	Male	32	25.11	8.15	30.7	-	-	+	1	1	Employee	HRZE	0.3qd	0.45qd	0.5tid	0.75qd	37.97
Improvement	Female	36	9	0.3	32.2	-	-	+	0	0	Employee	HRZE	0.3qd	0.45qd	0.5tid	0.75qd	37.97
Improvement	Male	25	25.11	2.98	33.3	-	-	+	0	0	Student	HRZE	0.3qd	0.45qd	0.5tid	0.75qd	No symptoms
Improvement	Female	37	3	0.31	24.6	-	-	+	0	0	Farmer	HRZE	0.3qd	0.45qd	0.5tid	0.75qd	30
Improvement	Male	23	16	33.63	32.3	-	-	+	1	0	Student	HRZE	0.3qd	0.6qd	0.5tid	0.75qd	No symptoms
Improvement	Female	31	25.11	4.42	33.6	-	-	+	0	0	Employee	HRZE	0.3qd	0.45qd	0.5tid	0.75qd	37.97
Improvement	Male	70	10	5.36	29	-	-	+	0	1	Unemployed individual	HRftZ	0.3qd	0.45biw	0.5tid		No symptoms
Improvement	Female	27	25.11	1.02	34.2	-	-	+	0	1	Employee	HRftZ	0.3qd	0.45qd	0.5tid	0.75qd	No symptoms
Improvement	Male	29	25.11	24.5	1.26	-	-	+	1	1	Employee	HRZE	0.4qd	0.6qd	0.5tid	1.0qd	90
Improvement	Male	61	74	106.77	25.7	-	-	+	1	1	Farmer	HRZE	0.3qd	0.45qd	0.5tid	0.75qd	37.97
Improvement	Female	42	25.11	0.52	38.3	-	-	+	0	0	Employee	Ethambutol Hydrochloride，Pyrazinamide，Rifampicin and Isoniazid Tablets Ⅱ	2.7qd				No symptoms
Improvement	Female	25	25.11	0.46	29.7	-	-	+	0	0	Employee	HRZE	0.3qd	0.45qd	0.5tid	0.75qd	30
Improvement	Female	42	25.11	0.53	30.9	-	-	+	0	0	Employee	HRZE	0.3qd	0.45qd	0.5tid	0.75qd	37.97
Improvement	Female	35	25.11	2022	36.9	-	-	+	0	0	Employee	HRZE	0.3qd	0.6qd	0.5tid	0.75qd	37.97
Improvement	Male	19	2	0.24	28	-	-	+	0	0	Student	HRZE	0.4qd	0.45qd	0.5tid	0.75qd	37.97
Improvement	Male	40	25.11	0.29	23.2	-	-	+	1	1	Employee	HRZE	0.3qd	0.45qd	0.5tid	0.75qd	3
Improvement	Male	52	25.11	16.76	29.4	-	-	+	1	1	Unemployed individual	HRZE	0.3qd	0.45qd	0.5tid	0.75qd	37.97
Improvement	Male	28	25.11	1.08	30.2	-	-	+	1	1	Worker	HRZE	0.3qd	0.45qd	0.5tid	0.75qd	No symptoms
Improvement	Female	46	23	6.21	30.3	-	-	+	0	0	Worker	HRZE	0.3qd	0.45qd	0.5tid	0.75qd	37.97
Improvement	Female	40	27.16	0.14	36.4	-	-	+	0	0	Employee	HRftZE	0.3qd	0.6biw	0.5tid	0.75qd	7
Improvement	Male	33	27.16	48.06	36.6	-	-	+	0	0	Worker	Ethambutol Hydrochloride，Pyrazinamide，Rifampicin and Isoniazid Tablets Ⅱ	4.5qd				2
Improvement	Male	22	17	99.39	38.6	-	-	+	0	0	Employee	HRZE	0.4qd	0.6qd	0.5tid	0.75qd	37.97
Improvement	Male	43	27.16	1.02	32.8	-	-	+	1	1	Worker	HRZE	0.4qd	0.6qd	0.5tid	0.75qd	37.97
Improvement	Female	30	27.16	4.74	37.9	-	-	+	0	0	Employee	HRZE	0.4qd	0.6qd	0.5tid	0.75qd	40
Improvement	Female	29	27.16	0.9	30.5	-	-	+	0	0	Worker	HRZE	0.3qd	0.45qd	0.5tid	0.75qd	7
Improvement	Female	36	27.16	4.46	30.3	-	-	+	0	0	Worker	Ethambutol Hydrochloride，Pyrazinamide，Rifampicin and Isoniazid Tablets Ⅱ	3.6qd				No symptoms
Improvement	Male	38	27.16	0.37	28.3	-	-	+	1	1	Worker	HRZE	0.3qd	0.45qd	0.5tid	0.75qd	60
Improvement	Female	19	27.16	0.29	28.7	-	-	+	0	0	Student	HRftZ	0.3qd	0.45biw	0.5tid		37.97
Improvement	Male	33	27.16	1.07	32.6	-	-	+	1	1	Worker	HRZE	0.4qd	0.45qd	0.5tid	0.75qd	37.97
Improvement	Female	35	27.16	0.45	27.8	-	-	+	0	0	Worker	HRZE	0.3qd	0.45qd	0.5tid	0.75qd	45
Improvement	Female	20	27.16	1.81	29.5	-	-	+	0	0	Student	HRZE	0.3qd	0.45qd	0.5tid	0.75qd	30
Improvement	Female	44	78	62.9	26	-	-	+	0	0	Others	HRZE	0.3qd	0.45qd	0.5tid	0.75qd	7
Improvement	Female	63	5	1.32	20.4	-	-	+	0	0	Others	HRftE	0.3qd	0.45biw		0.75qd	37.97
Improvement	Male	31	27.16	4.29	31.1	-	-	+	1	1	Unemployed individual	HRZE	0.3qd	0.45qd	0.5tid	0.75qd	37.97
Improvement	Female	26	27.16	1.32	32.4	-	-	+	0	0	Employee	HRZE	0.3qd	0.6qd	0.5tid	0.75qd	30
Improvement	Male	28	27.16	4.27	33.6	-	-	+	1	1	Employee	Ethambutol Hydrochloride，Pyrazinamide，Rifampicin and Isoniazid Tablets Ⅱ	3.6qd				30
Improvement	Female	36	27.16	2.09	31.6	-	-	+	0	0	Unemployed individual	HRZE	0.3qd	0.45qd	0.5tid	0.75qd	2
Improvement	Male	23	27.16	35	35	-	-	+	1	1	Worker	HRZE	0.3qd	0.45qd	0.5tid	0.75qd	37.97
Improvement	Female	27	7	2.99	27.6	-	-	+	0	0	Student	Ethambutol Hydrochloride，Pyrazinamide，Rifampicin and Isoniazid Tablets Ⅱ	3.6qd				2
Improvement	Female	28	27.16	76.11	35.9	-	-	+	0	0	Student	HRZE	0.3qd	0.45qd	0.5tid	0.75qd	37.97
Progression	Female	29	27.16	8.34	32.7	-	-	+	0	0	Worker	HRftZ	0.3 qd	0.45biw	0.5tid		No symptoms
Progression	Female	30	27.16	0.48	30.43	-	-	+	0	0	Worker	Ethambutol Hydrochloride，Pyrazinamide，Rifampicin and Isoniazid Tablets Ⅱ	2.7qd				38.37
Progression	Male	38	27.16	17.22	33.6	-	-	+	1	1	Worker	HRZE	0.3qd	0.45qd	0.5tid	0.5qd	38.37
Progression	Female	23	27.16	55.13	41.1	-	-	+	0	0	Student	HRZE	0.3qd	0.45qd	0.5tid	0.5qd	38.37
Progression	Male	37	27.16	0.27	24.2	-	-	+	1	1	Employee	Ethambutol Hydrochloride，Pyrazinamide，Rifampicin and Isoniazid Tablets Ⅱ	3.6qd				No symptoms
Progression	Male	27	27.16	0.86	26.6	-	-	+	1	1	Worker	HRZE	0.4qd	0.6qd	0.5tid	1.0qd	38.37
Progression	Male	68	14	7.55	33.3	-	-	+	1	1	Unemployed individual	HRZE	0.4qd	0.6qd	0.5tid	0.75qd	60
Progression	Male	24	5	2.26	27.5	-	-	+	0	0	Employee	HRZE	0.4qd	0.6qd	0.5tid	0.75qd	180
Progression	Male	63	5	1.04	25.9	-	-	+	1	0	Others	HRZE	0.3qd	0.45qd	0.5tid	0.75qd	10
Progression	Male	51	85	156.53	32.5	-	-	+	1	1	Unemployed individual	HRZE	0.3qd	0.45qd	0.5tid	0.75qd	30
Progression	Female	26	27.16	28.94	38.9	-	-	+	0	0	Student	HRZE	0.3qd	0.45qd	0.5tid	0.75qd	3
Progression	Male	22	27.16	12.43	26.3	-	-	+	0	0	Unemployed individual	HRZE	0.3qd	0.45qd	0.5tid	0.75qd	90
Progression	Female	46	27.16	0.18	23.6	-	-	+	0	0	Worker	HRZ	0.3qd	0.45qd	0.5tid		No symptoms
Progression	Male	27	10	5.86	33.6	-	-	+	0	0	Others	HRZE	0.3qd	0.45qd	0.5tid	0.75qd	7
Progression	Male	30	27.16	0.94	28.3	-	-	+	1	1	Employee	Ethambutol Hydrochloride，Pyrazinamide，Rifampicin and Isoniazid Tablets Ⅱ	3.6qd				60
Progression	Male	80	27.16	6.63	31	-	-	+	1	1	Others	HRE	0.3qd	0.45qd		0.75qd	120
Progression	Female	22	27.16	0.79	30.4	-	-	+	0	0	Student	HRZE	0.3qd	0.45qd	0.5tid	0.75qd	7
Progression	Male	16	3	6.56	24.7	-	-	+	0	0	Student	HRZE	0.3qd	0.45qd	0.5tid	0.75qd	7
Progression	Male	41	27.16	0.67	31.6	-	-	+	0	0	Others	HRZE	0.3qd	0.45qd	0.5tid	0.75qd	7
Progression	Male	29	27.16	0.44	28.4	-	-	+	0	0	Worker	HRZE	0.3qd	0.45qd	0.5tid	0.75qd	90
Progression	Male	41	4	13.64	21.9	-	-	+	1	1	Worker	HRftZE	0.3qd	0.6qd	0.5tid	0.75qd	7
Progression	Female	33	27.16	10.94	35.3	-	-	+	0	0	Employee	HRZE	0.3qd	0.45qd	0.5tid	0.75qd	7
Progression	Female	42	41	5.34	34.9	-	-	+	0	0	Worker	HRE	0.3qd	0.45qd		0.75qd	30
Progression	Male	63	4	7.55	23.5	-	-	+	0	0	Worker	HRZE	0.3qd	0.45qd	0.5tid	0.75qd	60
Progression	Female	30	27.16	4.66	34.1	-	-	+	0	0	Employee	HRZE	0.3qd	0.45qd	0.5tid	0.75qd	60
Progression	Female	33	59	0.22	27.9	-	-	+	0	0	Worker	HRZE	0.3qd	0.45qd	0.5tid	0.75qd	30
Progression	Male	31	2	4.84	20.7	-	-	+	1	1	Employee	HRZE	0.3qd	0.45qd	0.5tid	0.75qd	No symptoms
Progression	Male	27	3	3.1	23.4	-	-	+	0	0	Others	HRftE	0.3qd	0.45qd		0.75qd	14
Progression	Female	31	27.16	0.28	32.4	-	-	+	0	0	Employee	HRZE	0.3qd	0.45qd	0.5tid	0.75qd	30
Progression	Female	27	27.16	16.73	35	-	-	+	0	0	Worker	Ethambutol Hydrochloride，Pyrazinamide，Rifampicin and Isoniazid Tablets Ⅱ	3.6qd				30
Progression	Female	23	27.16	1	27.7	-	-	+	0	0	Employee	HRE	0.3qd	0.45qd		0.75qd	1
Progression	Male	40	3	2.93	35.8	-	-	+	0	0	Employee	HRZE	0.3qd	0.45qd	0.5tid	0.75qd	4
Progression	Female	41	27.16	0.91	31.3	-	-	+	0	0	Worker	Ethambutol Hydrochloride，Pyrazinamide，Rifampicin and Isoniazid Tablets Ⅱ	2.7qd				7
Progression	Male	22	27.16	0.89	28.7	-	-	+	0	0	Student	HRZE	0.3qd	0.6qd	0.5tid	0.75qd	6
Progression	Male	27	27.16	0.64	29.7	-	-	+	0	0	Unemployed individual	HRZE	0.3qd	0.6qd	0.5tid	0.75qd	1
Progression	Female	34	27.16	0.31	28.3	-	-	+	0	0	Others	HRZE	0.3qd	0.45qd	0.5tid	0.75qd	360
Progression	Male	38	74	148.35	30.3	-	-	+	1	1	Unemployed individual	HRZE	0.3qd	0.45qd	0.5tid	0.75qd	60
Progression	Male	33	27.16	8.35	32	-	-	+	1	1	Farmer	HRftZE	0.3qd	0.6qd	0.5tid	0.75qd	30
Progression	Male	34	27.16	0.67	32.7	-	-	+	1	1	Worker	HRZE	0.3qd	0.45qd	0.5tid	0.75qd	2
Progression	Female	24	27.16	0.41	29.3	-	-	+	0	0	Unemployed individual	HRZE	0.3qd	0.45qd	0.5tid	0.75qd	6
Progression	Male	50	97	57.95	41.3	-	-	+	0	1	Worker	HRZE	0.3qd	0.6qd	0.5tid	0.75qd	30
Progression	Male	23	27.16	0.88	29	-	-	+	0	0	Student	HRZE	0.3qd	0.45qd	0.5tid	0.75qd	30
Progression	Female	32	27.16	0.08	26.8	-	-	+	0	0	Unemployed individual	HRZE	0.3qd	0.45qd	0.5tid	0.75qd	14
Progression	Female	28	27.16	0.77	29.8	-	-	+	0	0	Worker	HRZE	0.3qd	0.45qd	0.5tid	0.75qd	7
Progression	Male	27	27.16	0.72	26.8	-	-	+	1	1	Employee	HRZE	0.3qd	0.45qd	0.5tid	0.75qd	7
Progression	Male	30	27.16	1.96	33.7	-	-	+	0	0	Others	HRZE	0.3qd	0.45qd	0.5tid	0.75qd	7
Progression	Male	36	27.16	4.46	35.5	-	-	+	1	1	Worker	HRZE	0.3qd	0.45qd	0.5tid	0.75qd	120
Progression	Male	29	27.16	0.44	27.3	-	-	+	1	0	Employee	HRZE	0.3qd	0.45qd	0.5tid	0.75qd	No symptoms
Progression	Female	31	27.16	12.43	30.43	-	-	+	0	0	Worker	HRZE	0.3qd	0.45qd	0.5tid	0.75qd	30
Progression	Female	24	27.16	0.69	26.2	-	-	+	0	0	Student	Ethambutol Hydrochloride，Pyrazinamide，Rifampicin and Isoniazid Tablets Ⅱ	2.7qd				60
Progression	Female	35	27.16	5.96	32.5	-	-	+	0	0	Worker	Ethambutol Hydrochloride，Pyrazinamide，Rifampicin and Isoniazid Tablets Ⅱ	3.6qd				14
Progression	Male	34	27.16	0.23	25	-	-	+	1	1	Employee	HRZE	0.3qd	0.45qd	0.5tid	0.75qd	No symptoms
Progression	Female	47	27.16	1.79	31.9	-	-	+	0	0	Worker	HRZE	0.3qd	0.45qd	0.5tid	0.75qd	60
Progression	Male	77	27.16	0.64	26.1	-	-	+	0	0	Others	HRE	0.3qd	0.45qd		0.75qd	5
Progression	Male	25	27.16	38.23	31.2	-	-	+	0	0	Student	HRZE	0.3qd	0.45qd	0.5tid	0.75qd	4
Progression	Female	33	9	5.75	29.1	-	-	+	0	0	Worker	HRZE	0.3qd	0.45qd	0.5tid	0.75qd	7
Progression	Male	26	27.16	4.33	27.9	-	-	+	0	0	Student	HRftZE	0.3qd	0.45biw	0.5tid	0.75qd	15
Progression	Female	81	60	44.74	32.4	-	-	+	0	0	Farmer	HRZE	0.3qd	0.45qd	0.5tid	0.75qd	120
Progression	Male	59	27.16	0.21	20.4	-	-	+	1	1	Employee	HRZE	0.3qd	0.45qd	0.5tid	0.75qd	90
Progression	Female	30	39	21.12	31.6	-	-	+	0	0	Worker	HRZE	0.3qd	0.45qd	0.5tid	0.75qd	2
Progression	Male	45	6	2.1	21.5	-	-	+	1	1	Employee	HRZE	0.3qd	0.45qd	0.5tid	0.75qd	1
Progression	Female	32	27.16	0.43	27.2	-	-	+	0	0	Employee	Ethambutol Hydrochloride，Pyrazinamide，Rifampicin and Isoniazid Tablets Ⅱ	3.6qd				7
Progression	Female	27	27.16	2.05	33.7	-	-	+	0	0	Worker	HRZE	0.3qd	0.45qd	0.5tid	0.75qd	2
Progression	Male	36	27.16	4.45	29	-	-	+	0	0	Employee	Ethambutol Hydrochloride，Pyrazinamide，Rifampicin and Isoniazid Tablets Ⅱ	4.5qd				No symptoms
Progression	Male	26	27.16	1.53	29.7	-	-	+	0	0	Student	Ethambutol Hydrochloride，Pyrazinamide，Rifampicin and Isoniazid Tablets Ⅱ	4.5qd				No symptoms
Progression	Male	29	27.16	0.58	26.2	-	-	+	1	1	Worker	HRZE	0.3qd	0.45qd	0.5tid	0.75qd	No symptoms
Progression	Female	28	40	21.89	33.8	-	-	+	0	0	Employee	HRZE	0.3qd	0.45qd	0.5tid	0.75qd	2
Progression	Male	67	9	4.01	25.5	-	-	+	0	0	Farmer	HRZE	0.3qd	0.45qd	0.5tid	0.75qd	15
Progression	Female	34	27.16	0.57	30.4	-	-	+	0	0	Farmer	HRZE	0.3qd	0.6qd	0.5tid	0.75qd	14
Progression	Male	28	27.16	12.11	26.7	-	-	+	0	0	Worker	HRftE	0.3qd	0.6biw		0.75qd	180
Progression	Male	25	27.16	38.55	28.9	-	-	+	1	1	Worker	HRftE	0.3qd	0.6qd		0.75qd	No symptoms
Progression	Female	36	27.16	7.04	30.6	-	-	+	0	0	Employee	Ethambutol Hydrochloride，Pyrazinamide，Rifampicin and Isoniazid Tablets Ⅱ	3.6qd				7
Progression	Male	31	27.16	0.47	25.5	-	-	+	1	1	Worker	HRZE	0.3qd	0.6qd	0.5tid	0.75qd	No symptoms
Progression	Male	64	27.16	2.24	32.4	-	-	+	1	1	Unemployed individual	HRZE	0.3qd	0.45qd	0.5tid	0.75qd	210
Progression	Male	26	27.16	0.68	25.6	-	-	+	0	0	Unemployed individual	HRZE	0.3qd	0.45qd	0.5tid	0.75qd	7
Progression	Female	29	27.16	1.03	34.8	-	-	+	0	0	Unemployed individual	HRZE	0.3qd	0.45qd	0.5tid	0.75qd	38.37
Progression	Male	20	27.16	1.55	26	-	-	+	0	0	Student	HRZE	0.3qd	0.6qd	0.5tid	0.75qd	7
Progression	Female	24	27.16	4.84	29.2	-	-	+	0	0	Student	HRE	0.4qd	0.6qd		0.6qd	2
Progression	Female	32	27.16	0.25	32.5	-	-	+	0	0	Employee	HRftE	0.3qd	0.6biw		0.75qd	2
Progression	Male	35	27.16	53.02	39.6	-	-	+	1	1	Employee	HRZE	0.3qd	0.45qd	0.5tid	0.75qd	38.37
Progression	Female	28	27.16	2.6	31.9	-	-	+	0	0	Employee	HRZE	0.4qd	0.6qd	0.5tid	1.0qd	38.37
Progression	Male	84	27.16	0.27	34	-	-	+	1	1	Others	HRZE	0.3qd	0.45biw	0.5tid	0.75qd	38.37
Progression	Female	15	27.16	6.8	35.7	-	-	+	0	0	Student	HRZE	0.3qd	0.45qd	0.5tid	0.75qd	7
Progression	Male	24	27.16	39.7	34.9	-	-	+	1	1	Employee	HRZE	0.3qd	0.45qd	0.5tid	0.75qd	30
Progression	Male	25	27.16	7.75	42.4	-	-	+	0	0	Unemployed individual	HRZE	0.3qd	0.45qd	0.5tid	0.75qd	1
