# Supplementary material for: Machine learning and radiomics for predicting therapeutic efficacy in newly diagnosed sputum-negative pulmonary tuberculosis: a retrospective study
Source: PeerJ journal article supplement (doi:10.7717/peerj.20557), 2026-01-16
Supplement: Supplementary_material_7.docx [file Supplementary_material_7.docx]

STROBE Statement—checklist of items that should be included in reports of observational studies

|  | Item No. | Recommendation | Page  No. | Relevant text from manuscript |
| --- | --- | --- | --- | --- |
| **Title and abstract** | 1 | (*a*) Indicate the study’s design with a commonly used term in the title or the abstract | 1 | Machine Learning and Radiomics for Predicting Therapeutic efficacy in Newly Diagnosed sputum-negative pulmonary tuberculosis: a Retrospective study |
| (*b*) Provide in the abstract an informative and balanced summary of what was done and what was found | 3 | Machine learning models constructed using radiomic features extracted from various CT signs hold promise for predicting the therapeutic efficacy of newly diagnosed pulmonary tuberculosis patients after intensive therapy, thereby providing effective guidance for subsequent treatment. |
| Introduction | | | |  |
| Background/rationale | 2 | Explain the scientific background and rationale for the investigation being reported | 3-4 | Tuberculosis (TB) is a chronic infectious disease caused by Mycobacterium tuberculosis (MTB) and transmitted through the respiratory tract1, with nearly twice the number of deaths compared to AIDS2. The rise of drug-resistant strains makes TB control increasingly complex. Therefore, developing effective treatment strategies for newly diagnosed pulmonary TB patients is crucial for controlling the disease.  Effective treatment is crucial for preventing the spread of tuberculosis. When both sputum smear and culture are negative, but the bronchial alveolar lavage fluid（BALF）smear and culture for MTB are positive, traditional methods for evaluating treatment efficacy are subjective, invasive and time-consuming3. Utilizing emerging artificial intelligence techniques to predict treatment outcomes offers a novel approach for clinical practice. Radiomics transforms medical images into high-dimensional quantitative data, providing valuable insights into pathophysiology4，primarily applied to a variety of tumors. |
| Objectives | 3 | State specific objectives, including any prespecified hypotheses | 4 | The aim of this study is to predict whether newly diagnosed sputum-negative but BALF-positive pulmonary TB patients will experience disease progression or improvement after undergoing 2 months of the standard TB treatment regimen, based on the radiomic features of their initial CT scans. |
| Methods | | | |  |
| Study design | 4 | Present key elements of study design early in the paper | 5 | Two professional radiologists assessed the changes in lung lesions on CT images taken within 1 month before treatment and after 2 months of standard therapy, and in combination with the clinical evaluation by physicians, the patients were classified into progression and improvement groups. |
| Setting | 5 | Describe the setting, locations, and relevant dates, including periods of recruitment, exposure, follow-up, and data collection | 5 | Retrospective data were collected from Hospital 1 and Hospital 2 between 2020 and 2023, including chest CT scans and laboratory information from patients with newly diagnosed pulmonary tuberculosis. |
| Participants | 6 | (*a*) *Cohort study*—Give the eligibility criteria, and the sources and methods of selection of participants. Describe methods of follow-up  *Case-control study*—Give the eligibility criteria, and the sources and methods of case ascertainment and control selection. Give the rationale for the choice of cases and controls  *Cross-sectional study*—Give the eligibility criteria, and the sources and methods of selection of participants | 5 | (*a*) Patients were included based on: (1) negative sputum results but BALF-positive TB diagnosis, (2) drug-sensitive TB, (3) newly diagnosed status, and (4) availability of pre- and post-treatment CT scans. Exclusion criteria included irregular treatment, other pulmonary conditions (e.g., HIV), or poor image quality. A total of 255 patients were included: 178 in the training cohort from Hospital 1 and 77 in the test cohort from Hospital 2. Follow-up was conducted by comparing baseline and 2-month CT scans and clinical assessments. |
| (*b*)*Cohort study*—For matched studies, give matching criteria and number of exposed and unexposed  *Case-control study*—For matched studies, give matching criteria and the number of controls per case | - | - |
| Variables | 7 | Clearly define all outcomes, exposures, predictors, potential confounders, and effect modifiers. Give diagnostic criteria, if applicable | 5,6 | Two professional radiologists assessed the changes in lung lesions on CT images taken within 1 month before treatment and after 2 months of standard therapy, and in combination with the clinical evaluation by physicians, the patients were classified into progression and improvement groups.  "Progression" is only defined when symptoms, microbiology, and imaging all suggest clinical deterioration; otherwise, the condition is classified as "Improvement" |
| Data sources/ measurement | 8* | For each variable of interest, give sources of data and details of methods of assessment (measurement). Describe comparability of assessment methods if there is more than one group | 6,7 | CT images were acquired using standard chest CT protocols and reconstructed uniformly. ROI segmentation was performed by two radiologists using ITK-SNAP. Radiomic features were extracted following preprocessing and normalization. Clinical data were obtained from hospital records. Assessment methods were consistent across both centers. |
| Bias | 9 | Describe any efforts to address potential sources of bias | 7 | Two radiologists were blinded to the final therapeutic efficacy results during image interpretation and ROI delineation. Z-score normalization and uniform resampling were applied to reduce inter-scan variability. A standardized feature selection and modeling pipeline was used to avoid overfitting. |
| Study size | 10 | Explain how the study size was arrived at | 5 | According to the inclusion and exclusion criteria, a total of 178 patients were enrolled from Hospital 1 as the training cohort, of which 119 improved and 59 progressed. 77 patients were enrolled from Hospital 2 as the testing cohort, of which 51 improved and 26 progressed. |

Continued on next page

| Quantitative variables | 11 | Explain how quantitative variables were handled in the analyses. If applicable, describe which groupings were chosen and why | 8 | After standardizing the extracted radiomic features, Pearson analysis was performed to select features that were highly correlated between the improvement and progression groups. Features with a correlation coefficient greater than 0.8 were excluded. A least absolute shrinkage and selection operator (LASSO) logistic regression algorithm with ten-fold cross-validation was then applied to identify the most valuable features (those with non-zero coefficients) by selecting the optimal regularization parameter, alpha. |
| --- | --- | --- | --- | --- |
| Statistical methods | 12 | (*a*) Describe all statistical methods, including those used to control for confounding | 9 | The predictive performance of the models was quantified by the area under the receiver operating characteristic (ROC) curve (AUC) in both training and testing cohorts. Sensitivity, specificity, accuracy, and F1 score were calculated based on the confusion matrix. The DeLong test was used to compare the AUCs of the three models across both cohorts and to assess potential overfitting. Calibration curves were drawn to determine the accuracy of the model predictions. |
| (*b*) Describe any methods used to examine subgroups and interactions | 8,9 | Continuous variables are described as mean ± standard deviation, and the kappa test was used to assess the inter-reader agreement on key CT findings. The differences in continuous variables were analyzed using an independent two-sample t-test. |
| (*c*) Explain how missing data were addressed | 4 | Missing data were imputed using the median. |
| (*d*) *Cohort study*—If applicable, explain how loss to follow-up was addressed  *Case-control study*—If applicable, explain how matching of cases and controls was addressed  *Cross-sectional study*—If applicable, describe analytical methods taking account of sampling strategy | 4 | Missing data were imputed using the median. |
| (*e*) Describe any sensitivity analyses | 9 | Sensitivity, specificity, accuracy, and F1 score were calculated based on the confusion matrix. |
| Results | | | | |
| Participants | 13* | (a) Report numbers of individuals at each stage of study—eg numbers potentially eligible, examined for eligibility, confirmed eligible, included in the study, completing follow-up, and analysed | 5 | According to the inclusion and exclusion criteria, a total of 178 patients were enrolled from Hospital 1 as the training cohort, of which 119 improved and 59 progressed. 77 patients were enrolled from Hospital 2 as the testing cohort, of which 51 improved and 26 progressed. |
| (b) Give reasons for non-participation at each stage | - | - |
| (c) Consider use of a flow diagram | 5 | The patient recruitment flowchart is shown in Figure 1. |
| Descriptive data | 14* | (a) Give characteristics of study participants (eg demographic, clinical, social) and information on exposures and potential confounders | 9 | Table 1 summarizes the clinical information, clinical data, key CT findings and treatment regime of the patients. Except for the TIB sign, there were no significant differences in the clinical characteristics or major CT findings between the progression and improvement groups. The TIB sign was more common in the improvement group (P < 0.05). |
| (b) Indicate number of participants with missing data for each variable of interest | - | - |
| (c) *Cohort study*—Summarise follow-up time (eg, average and total amount) | 5 | Two professional radiologists assessed the changes in lung lesions on CT images taken within 1 month before treatment and after 2 months of standard therapy, and in combination with the clinical evaluation by physicians, the patients were classified into progression and improvement groups. |
| Outcome data | 15* | *Cohort study*—Report numbers of outcome events or summary measures over time | *5* | According to the inclusion and exclusion criteria, a total of 178 patients were enrolled from Hospital 1 as the training cohort, of which 119 improved and 59 progressed. 77 patients were enrolled from Hospital 2 as the testing cohort, of which 51 improved and 26 progressed. |
| *Case-control study—*Report numbers in each exposure category, or summary measures of exposure | *-* | *-* |
| *Cross-sectional study—*Report numbers of outcome events or summary measures | *-* | *-* |
| Main results | 16 | (*a*) Give unadjusted estimates and, if applicable, confounder-adjusted estimates and their precision (eg, 95% confidence interval). Make clear which confounders were adjusted for and why they were included | 10,11 | For the SVM model, the AUCs in the training and testing cohorts were 0.917 (95% CI, 0.895 to 0.938) and 0.808 (95% CI, 0.738 to 0.877), respectively. The F1 scores were 0.858 and 0.755 for the two cohorts. The RF model performed exceptionally well in the training cohort, with an AUC of 0.996 (95% CI, 0.993–0.999) and an F1 score of 0.982. This performance was confirmed in the testing cohort, where the AUC and F1 score were 0.824 (95% CI, 0.756–0.891) and 0.832, respectively. The LR model had AUCs and F1 scores of 0.927 (95% CI, 0.907 to 0.946) and 0.867 in the training cohort, and 0.808 (95% CI, 0.738 to 0.877) and 0.747 in the testing cohort. Thus, the RF model achieved the highest AUC among all models in both the training (0.996) and testing cohorts (0.824). Additionally, the RF model demonstrated better calibration in both the training and testing sets, indicating superior predictive performance and stronger generalization ability, as shown in Figure 6C-F. However, there were no significant differences between the models (P > 0.05). |
| (*b*) Report category boundaries when continuous variables were categorized | - | - |
| (*c*) If relevant, consider translating estimates of relative risk into absolute risk for a meaningful time period | - | - |

Continued on next page

| Other analyses | 17 | Report other analyses done—eg analyses of subgroups and interactions, and sensitivity analyses | 10,Table 3 | The performance of three models, both the training and testing cohorts, are shown in Figure 6 and Table 3. |
| --- | --- | --- | --- | --- |
| Discussion | | | | |
| Key results | 18 | Summarise key results with reference to study objectives | 11 | This study developed three machine learning models based on radiomics features extracted from different CT findings to effectively predict the therapeutic efficacy for this type of tuberculosis. By comparing the predictive performance of the RF, SVM, and LR models, we found that while there were no significant differences in overall performance, the RF model demonstrated the highest discriminative ability, outperforming the other two models. |
| Limitations | 19 | Discuss limitations of the study, taking into account sources of potential bias or imprecision. Discuss both direction and magnitude of any potential bias | 15 | This study has several limitations. First, the sample size is relatively small, and future studies will expand the sample to further validate the preliminary results. Second, this study did not include external validation. We fully recognize the importance of external validation and will prioritize the collection of larger external validation datasets in future research to further assess the actual performance of the model. Lastly, this study is retrospective in nature, and future research will focus on prospective studies to lay the groundwork for using this non-invasive and convenient technique in routine clinical practice. |
| Interpretation | 20 | Give a cautious overall interpretation of results considering objectives, limitations, multiplicity of analyses, results from similar studies, and other relevant evidence | 15 | The three models (RF, SVM, and LR) based on radiomic features extracted from five imaging signs demonstrated excellent performance in predicting the treatment efficacy of newly diagnosed sputum-negative but BALF-positive pulmonary tuberculosis after two months of intensive therapy. This can help patients avoid poor treatment outcomes, enable early adjustments to the treatment strategy, and prevent disease progression and transmission. |
| Generalisability | 21 | Discuss the generalisability (external validity) of the study results | 15 | We fully recognize the importance of external validation and will prioritize the collection of larger external validation datasets in future research to further assess the actual performance of the model. |
| Other information | |  | | |
| Funding | 22 | Give the source of funding and the role of the funders for the present study and, if applicable, for the original study on which the present article is based | 16 | This study was supported by the Beijing Research Ward Excellence Program (BRWEP2024W042160100), the Beijing Hospitals Authority Ascent Plan (DFL20221401), and the National Key Research and Development Program of China (2022YFC2304803). |

*Give information separately for cases and controls in case-control studies and, if applicable, for exposed and unexposed groups in cohort and cross-sectional studies.

**Note:** An Explanation and Elaboration article discusses each checklist item and gives methodological background and published examples of transparent reporting. The STROBE checklist is best used in conjunction with this article (freely available on the Web sites of PLoS Medicine at http://www.plosmedicine.org/, Annals of Internal Medicine at http://www.annals.org/, and Epidemiology at http://www.epidem.com/). Information on the STROBE Initiative is available at www.strobe-statement.org.
